# Supplementary material
Source: publisher site journal article supplement (https://www.dovepress.com/article/552065)
Supplement: Supplementary file 1 [file 552065%20Supplementary%20Material.docx]

Supplementary materials


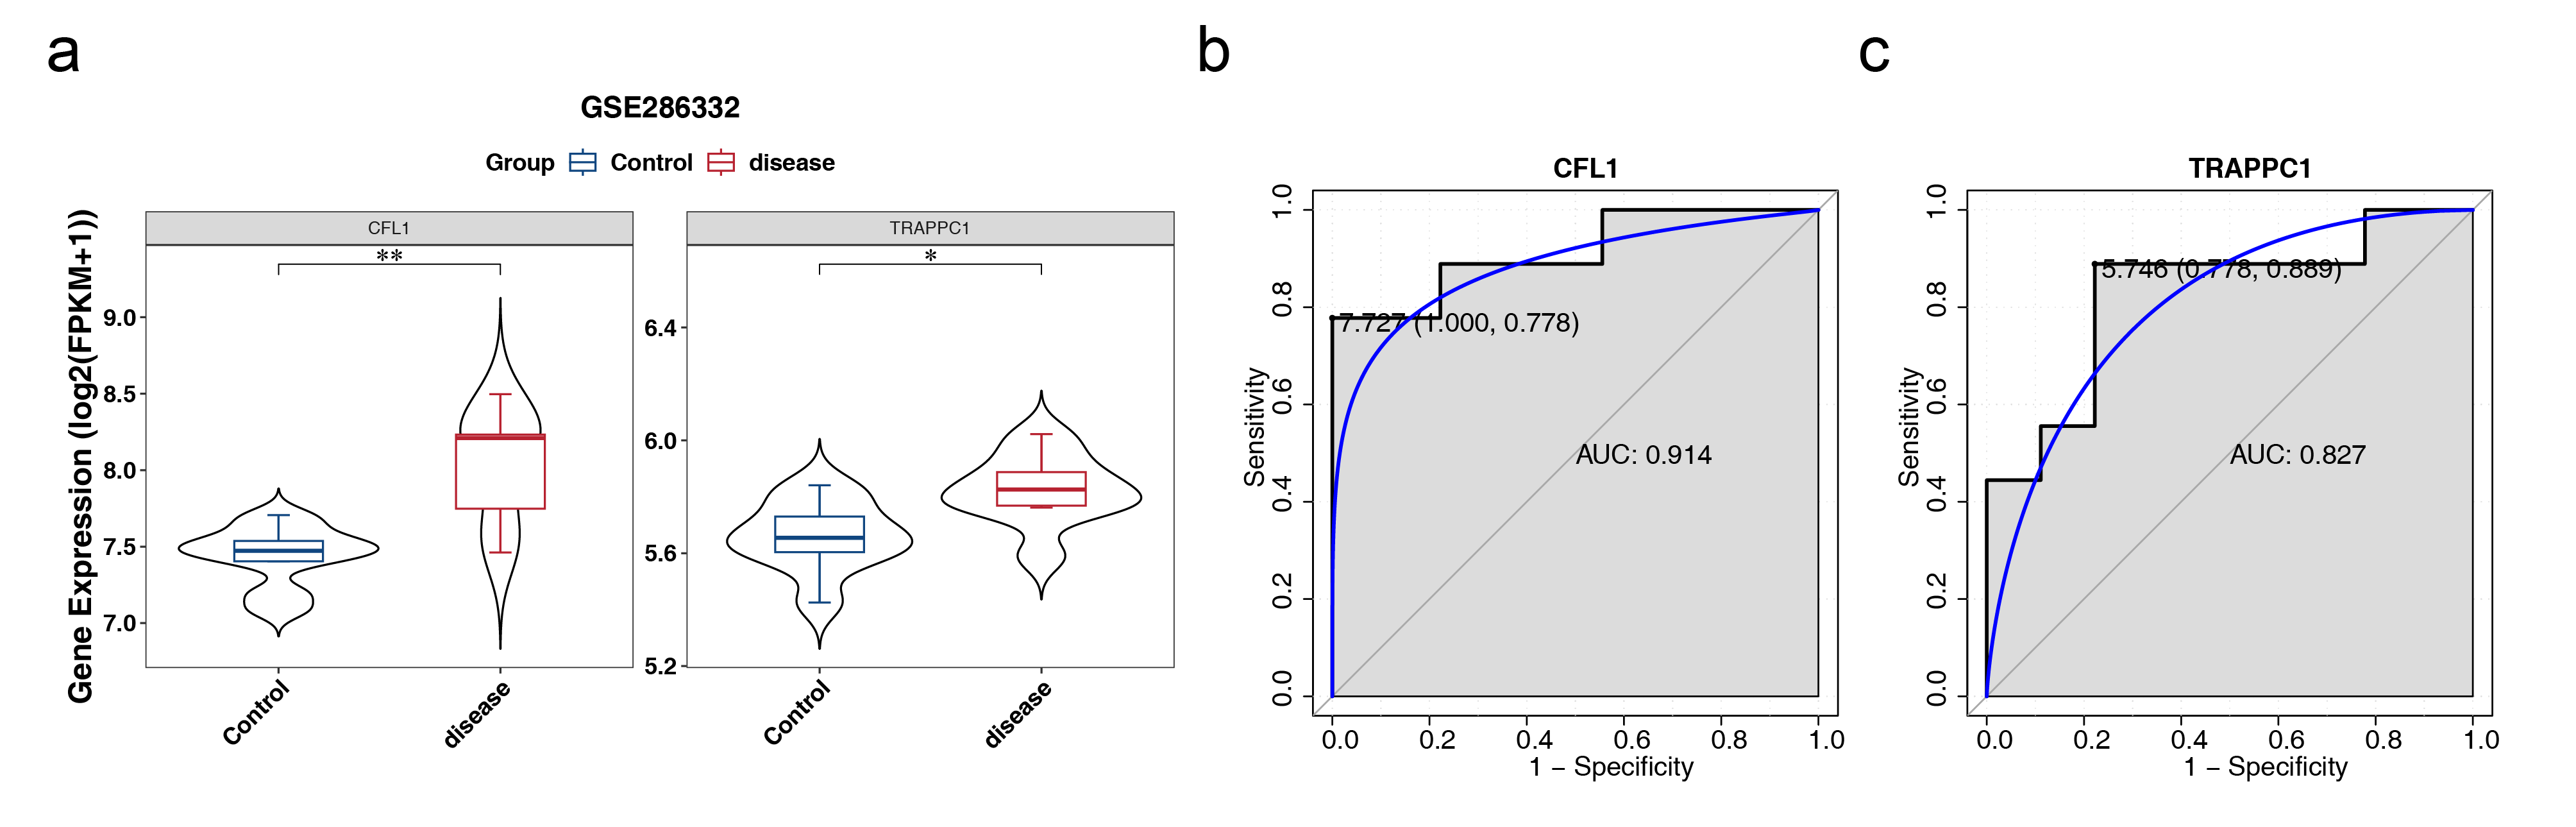


**Fig S1 (a)**The expression levels of biomarkers were verified in the external validation set. (b) ROC curve of CFL1. (c) ROC curve of TRAPPC1.

**Table S1** GSE138198 clinical information form.

| Sample_geo_accession | !Sample_source_name_ch1 | !Sample_organism_ch1 | !Sample_characteristics_ch1 |
| --- | --- | --- | --- |
| GSM4101749 | HT histology | Homo sapiens | gender: F |
| GSM4101750 | HT histology | Homo sapiens | gender: F |
| GSM4101751 | HT histology | Homo sapiens | gender: F |
| GSM4101752 | HT histology | Homo sapiens | gender: F |
| GSM4101753 | HT histology | Homo sapiens | gender: F |
| GSM4101754 | HT histology | Homo sapiens | gender: F |
| GSM4101755 | HT histology | Homo sapiens | gender: F |
| GSM4101756 | HT histology | Homo sapiens | gender: F |
| GSM4101757 | HT histology | Homo sapiens | gender: F |
| GSM4101758 | HT histology | Homo sapiens | gender: F |
| GSM4101759 | HT histology | Homo sapiens | gender: F |
| GSM4101760 | HT histology | Homo sapiens | gender: F |
| GSM4101761 | HT histology | Homo sapiens | gender: M |
| GSM4101762 | PTC histology (stage I) with HT in background | Homo sapiens | gender: F |
| GSM4101763 | PTC histology (stage I) with HT in background | Homo sapiens | gender: M |
| GSM4101764 | PTC histology (stage I) with HT in background | Homo sapiens | gender: F |
| GSM4101765 | PTC histology (stage I) with HT in background | Homo sapiens | gender: F |
| GSM4101766 | PTC histology (stage I) with HT in background | Homo sapiens | gender: M |
| GSM4101767 | PTC histology (stage I) with HT in background | Homo sapiens | gender: F |
| GSM4101768 | PTC histology (stage I) with HT in background | Homo sapiens | gender: F |
| GSM4101769 | PTC histology (stage I) with HT in background | Homo sapiens | gender: F |
| GSM4101770 | PTC histology (stage I) without HT in background | Homo sapiens | gender: M |
| GSM4101771 | PTC histology (stage I) without HT in background | Homo sapiens | gender: F |
| GSM4101772 | PTC histology (stage I) without HT in background | Homo sapiens | gender: F |
| GSM4101773 | PTC histology (stage I) without HT in background | Homo sapiens | gender: F |
| GSM4101774 | PTC histology (stage II) without HT in background | Homo sapiens | gender: M |
| GSM4101775 | PTC histology (stage I) without HT in background | Homo sapiens | gender: M |
| GSM4101776 | mPTC histology (stage I) | Homo sapiens | gender: F |
| GSM4101777 | mPTC histology (stage I) | Homo sapiens | gender: F |
| GSM4101778 | mPTC histology (stage I) | Homo sapiens | gender: F |
| GSM4101779 | mPTC histology (stage I) | Homo sapiens | gender: M |
| GSM4101780 | mPTC histology (stage I) | Homo sapiens | gender: F |
| GSM4101781 | mPTC histology (stage I) | Homo sapiens | gender: F |
| GSM4101782 | Thyroid, normal histology | Homo sapiens | gender: not available |
| GSM4101783 | Thyroid, normal histology | Homo sapiens | gender: not available |
| GSM4101784 | Thyroid, normal histology | Homo sapiens | gender: not available |

**Table S2** GSE165004 clinical information form.

|  | !Sample_organism_ch1 | !Sample_characteristics_ch1 | !Sample_characteristics_ch1 |  |  |
| --- | --- | --- | --- | --- | --- |
| GSM5024320 | Homo sapiens | subject status/group: Control | tissue: Endometrial tissue |  |  |
| GSM5024321 | Homo sapiens | subject status/group: Control | tissue: Endometrial tissue |  |  |
| GSM5024322 | Homo sapiens | subject status/group: Control | tissue: Endometrial tissue |  |  |
| GSM5024323 | Homo sapiens | subject status/group: Control | tissue: Endometrial tissue |  |  |
| GSM5024324 | Homo sapiens | subject status/group: Control | tissue: Endometrial tissue |  |  |
| GSM5024325 | Homo sapiens | subject status/group: Control | tissue: Endometrial tissue |  |  |
| GSM5024326 | Homo sapiens | subject status/group: Control | tissue: Endometrial tissue |  |  |
| GSM5024327 | Homo sapiens | subject status/group: Control | tissue: Endometrial tissue |  |  |
| GSM5024328 | Homo sapiens | subject status/group: Control | tissue: Endometrial tissue |  |  |
| GSM5024329 | Homo sapiens | subject status/group: Control | tissue: Endometrial tissue |  |  |
| GSM5024330 | Homo sapiens | subject status/group: Control | tissue: Endometrial tissue |  |  |
| GSM5024331 | Homo sapiens | subject status/group: Control | tissue: Endometrial tissue |  |  |
| GSM5024332 | Homo sapiens | subject status/group: Control | tissue: Endometrial tissue |  |  |
| GSM5024333 | Homo sapiens | subject status/group: Control | tissue: Endometrial tissue |  |  |
| GSM5024334 | Homo sapiens | subject status/group: Control | tissue: Endometrial tissue |  |  |
| GSM5024335 | Homo sapiens | subject status/group: Control | tissue: Endometrial tissue |  |  |
| GSM5024336 | Homo sapiens | subject status/group: Control | tissue: Endometrial tissue |  |  |
| GSM5024337 | Homo sapiens | subject status/group: Control | tissue: Endometrial tissue |  |  |
| GSM5024338 | Homo sapiens | subject status/group: Control | tissue: Endometrial tissue |  |  |
| GSM5024339 | Homo sapiens | subject status/group: Control | tissue: Endometrial tissue |  |  |
| GSM5024340 | Homo sapiens | subject status/group: Control | tissue: Endometrial tissue |  |  |
| GSM5024341 | Homo sapiens | subject status/group: Control | tissue: Endometrial tissue |  |  |
| GSM5024342 | Homo sapiens | subject status/group: Control | tissue: Endometrial tissue |  |  |
| GSM5024343 | Homo sapiens | subject status/group: Control | tissue: Endometrial tissue |  |  |
| GSM5024344 | Homo sapiens | subject status/group: patient with RPL | tissue: Endometrial tissue |  |  |
| GSM5024345 | Homo sapiens | subject status/group: patient with RPL | tissue: Endometrial tissue |  |  |
| GSM5024346 | Homo sapiens | subject status/group: patient with RPL | tissue: Endometrial tissue |  |  |
| GSM5024347 | Homo sapiens | subject status/group: patient with RPL | tissue: Endometrial tissue |  |  |
| GSM5024348 | Homo sapiens | subject status/group: patient with RPL | tissue: Endometrial tissue |  |  |
| GSM5024349 | Homo sapiens | subject status/group: patient with RPL | tissue: Endometrial tissue |  |  |
| GSM5024350 | Homo sapiens | subject status/group: patient with RPL | tissue: Endometrial tissue |  |  |
| GSM5024351 | Homo sapiens | subject status/group: patient with RPL | tissue: Endometrial tissue |  |  |
| GSM5024352 | Homo sapiens | subject status/group: patient with RPL | tissue: Endometrial tissue |  |  |
| GSM5024353 | Homo sapiens | subject status/group: patient with RPL | tissue: Endometrial tissue |  |  |
| GSM5024354 | Homo sapiens | subject status/group: patient with RPL | tissue: Endometrial tissue |  |  |
| GSM5024355 | Homo sapiens | subject status/group: patient with RPL | tissue: Endometrial tissue |  |  |
| GSM5024356 | Homo sapiens | subject status/group: patient with RPL | tissue: Endometrial tissue |  |  |
| GSM5024357 | Homo sapiens | subject status/group: patient with RPL | tissue: Endometrial tissue |  |  |
| GSM5024358 | Homo sapiens | subject status/group: patient with RPL | tissue: Endometrial tissue |  |  |
| GSM5024359 | Homo sapiens | subject status/group: patient with RPL | tissue: Endometrial tissue |  |  |
| GSM5024360 | Homo sapiens | subject status/group: patient with RPL | tissue: Endometrial tissue |  |  |
| GSM5024361 | Homo sapiens | subject status/group: patient with RPL | tissue: Endometrial tissue |  |  |
| GSM5024362 | Homo sapiens | subject status/group: patient with RPL | tissue: Endometrial tissue |  |  |
| GSM5024363 | Homo sapiens | subject status/group: patient with RPL | tissue: Endometrial tissue |  |  |
| GSM5024364 | Homo sapiens | subject status/group: patient with RPL | tissue: Endometrial tissue |  |  |
| GSM5024365 | Homo sapiens | subject status/group: patient with RPL | tissue: Endometrial tissue |  |  |
| GSM5024366 | Homo sapiens | subject status/group: patient with RPL | tissue: Endometrial tissue |  |  |
| GSM5024367 | Homo sapiens | subject status/group: patient with RPL | tissue: Endometrial tissue |  |  |
| GSM5024368 | Homo sapiens | subject status/group: patient with UIF | tissue: Endometrial tissue |  |  |
| GSM5024369 | Homo sapiens | subject status/group: patient with UIF | tissue: Endometrial tissue |  |  |
| GSM5024370 | Homo sapiens | subject status/group: patient with UIF | tissue: Endometrial tissue |  |  |
| GSM5024371 | Homo sapiens | subject status/group: patient with UIF | tissue: Endometrial tissue |  |  |
| GSM5024372 | Homo sapiens | subject status/group: patient with UIF | tissue: Endometrial tissue |  |  |
| GSM5024373 | Homo sapiens | subject status/group: patient with UIF | tissue: Endometrial tissue |  |  |
| GSM5024374 | Homo sapiens | subject status/group: patient with UIF | tissue: Endometrial tissue |  |  |
| GSM5024375 | Homo sapiens | subject status/group: patient with UIF | tissue: Endometrial tissue |  |  |
| GSM5024376 | Homo sapiens | subject status/group: patient with UIF | tissue: Endometrial tissue |  |  |
| GSM5024377 | Homo sapiens | subject status/group: patient with UIF | tissue: Endometrial tissue |  |  |
| GSM5024378 | Homo sapiens | subject status/group: patient with UIF | tissue: Endometrial tissue |  |  |
| GSM5024379 | Homo sapiens | subject status/group: patient with UIF | tissue: Endometrial tissue |  |  |
| GSM5024380 | Homo sapiens | subject status/group: patient with UIF | tissue: Endometrial tissue |  |  |
| GSM5024381 | Homo sapiens | subject status/group: patient with UIF | tissue: Endometrial tissue |  |  |
| GSM5024382 | Homo sapiens | subject status/group: patient with UIF | tissue: Endometrial tissue |  |  |
| GSM5024383 | Homo sapiens | subject status/group: patient with UIF | tissue: Endometrial tissue |  |  |
| GSM5024384 | Homo sapiens | subject status/group: patient with UIF | tissue: Endometrial tissue |  |  |
| GSM5024385 | Homo sapiens | subject status/group: patient with UIF | tissue: Endometrial tissue |  |  |
| GSM5024386 | Homo sapiens | subject status/group: patient with UIF | tissue: Endometrial tissue |  |  |
| GSM5024387 | Homo sapiens | subject status/group: patient with UIF | tissue: Endometrial tissue |  |  |
| GSM5024388 | Homo sapiens | subject status/group: patient with UIF | tissue: Endometrial tissue |  |  |
| GSM5024389 | Homo sapiens | subject status/group: patient with UIF | tissue: Endometrial tissue |  |  |
| GSM5024390 | Homo sapiens | subject status/group: patient with UIF | tissue: Endometrial tissue |  |  |
| GSM5024391 | Homo sapiens | subject status/group: patient with UIF | tissue: Endometrial tissue |  |  |

**Table S3** GSE26787 clinical information form.

|  | source_name_ch1 | organism_ch1 | characteristics_ch1 | characteristics_ch1.1 |  |
| --- | --- | --- | --- | --- | --- |
| GSM659103 | fertile | Homo sapiens | gender: female | tissue: endometrium |  |
| GSM659104 | fertile | Homo sapiens | gender: female | tissue: endometrium |  |
| GSM659105 | fertile | Homo sapiens | gender: female | tissue: endometrium |  |
| GSM659106 | fertile | Homo sapiens | gender: female | tissue: endometrium |  |
| GSM659107 | fertile | Homo sapiens | gender: female | tissue: endometrium |  |
| GSM659108 | implantation failure | Homo sapiens | gender: female | tissue: endometrium |  |
| GSM659109 | implantation failure | Homo sapiens | gender: female | tissue: endometrium |  |
| GSM659110 | implantation failure | Homo sapiens | gender: female | tissue: endometrium |  |
| GSM659111 | implantation failure | Homo sapiens | gender: female | tissue: endometrium |  |
| GSM659112 | implantation failure | Homo sapiens | gender: female | tissue: endometrium |  |
| GSM659113 | recurrent spontaneous abortion | Homo sapiens | gender: female | tissue: endometrium |  |
| GSM659114 | recurrent spontaneous abortion | Homo sapiens | gender: female | tissue: endometrium |  |
| GSM659115 | recurrent spontaneous abortion | Homo sapiens | gender: female | tissue: endometrium |  |
| GSM659116 | recurrent spontaneous abortion | Homo sapiens | gender: female | tissue: endometrium |  |
| GSM659117 | recurrent spontaneous abortion | Homo sapiens | gender: female | tissue: endometrium |  |

**Table S4** GSE286332 clinical information form.

| Sample_description | !Sample_geo_accession | !Sample_organism_ch1 | !Sample_characteristics_ch1 | !Sample_characteristics_ch1 | group |
| --- | --- | --- | --- | --- | --- |
| NG_10 | GSM8723683 | Homo sapiens | tissue: Thyroid | Sex: Female | Control |
| NG_11 | GSM8723684 | Homo sapiens | tissue: Thyroid | Sex: Female | Control |
| NG_12 | GSM8723685 | Homo sapiens | tissue: Thyroid | Sex: Male | Control |
| NG_16 | GSM8723686 | Homo sapiens | tissue: Thyroid | Sex: Male | Control |
| NG_18 | GSM8723687 | Homo sapiens | tissue: Thyroid | Sex: Female | Control |
| NG_21 | GSM8723688 | Homo sapiens | tissue: Thyroid | Sex: Female | Control |
| NG_22 | GSM8723689 | Homo sapiens | tissue: Thyroid | Sex: Female | Control |
| NG_32 | GSM8723690 | Homo sapiens | tissue: Thyroid | Sex: Female | Control |
| NG_35 | GSM8723691 | Homo sapiens | tissue: Thyroid | Sex: Female | Control |
| TH_1 | GSM8723692 | Homo sapiens | tissue: Thyroid | Sex: Female | disease |
| TH_2 | GSM8723693 | Homo sapiens | tissue: Thyroid | Sex: Female | disease |
| TH_4 | GSM8723694 | Homo sapiens | tissue: Thyroid | Sex: Female | disease |
| TH_8 | GSM8723695 | Homo sapiens | tissue: Thyroid | Sex: Female | disease |
| TH_9 | GSM8723696 | Homo sapiens | tissue: Thyroid | Sex: Female | disease |
| TH_14 | GSM8723697 | Homo sapiens | tissue: Thyroid | Sex: Female | disease |
| TH_20 | GSM8723698 | Homo sapiens | tissue: Thyroid | Sex: Female | disease |
| TH_29 | GSM8723699 | Homo sapiens | tissue: Thyroid | Sex: Female | disease |
| TH_31 | GSM8723700 | Homo sapiens | tissue: Thyroid | Sex: Female | disease |

**Table S5.** In the GSE138198 dataset, the differential expression analysis.

|  | logFC | AveExpr | t | P.Value | adj.P.Val | B | change |
| --- | --- | --- | --- | --- | --- | --- | --- |
| PTH | -7.227574615 | 3.754615625 | -26.9697469 | 1.01910510630856e-15 | 2.37522827127337e-11 | 23.3494596336528 | Down |
| MYL2 | -7.112907692 | 4.8953225 | -13.18409387 | 1.56693344469409e-10 | 7.30410355909701e-07 | 14.1149339085482 | Down |
| MYBPC1 | -6.775075128 | 4.721698125 | -11.24806684 | 1.91542827193907e-09 | 3.35639858277262e-06 | 11.8367136633233 | Down |
| CKM | -6.093784103 | 5.54262375 | -13.81678613 | 7.3789314903148e-11 | 5.73269187482556e-07 | 14.7831239718355 | Down |
| SLN | -6.060974359 | 4.847875 | -8.736752721 | 8.45872296462224e-08 | 3.14586337579081e-05 | 8.25764939309624 | Down |
| XIRP2 | -5.864895385 | 3.8911025 | -8.238202997 | 1.95585251915144e-07 | 5.03945164032395e-05 | 7.44953384584161 | Down |
| TTN | -5.761749231 | 6.22027875 | -8.998919436 | 5.51086710871473e-08 | 2.51846626868263e-05 | 8.66882577400686 | Down |
| KLHL41 | -5.723389744 | 5.4054125 | -8.881718319 | 6.66748626579508e-08 | 2.81420095068207e-05 | 8.48616600705155 | Down |
| MT-TN | 5.41116076923077 | 9.509208125 | 11.2109421113328 | 2.01611447886114e-09 | 3.35639858277262e-06 | 11.7892680975565 | Up |
| NEB | -5.260280256 | 6.091495625 | -7.987949769 | 3.01460304317074e-07 | 6.17012652135681e-05 | 7.0306566622797 | Down |
| ACTN2 | -5.248587949 | 4.653435625 | -8.971665059 | 5.75966368068584e-08 | 2.53283927180651e-05 | 8.62651518051239 | Down |
| IGKV3D-11 | 5.24687538461538 | 10.55022625 | 6.65906905894505 | 3.4466144218878e-06 | 0.000323912267463463 | 4.65387014856378 | Up |
| IGKV3D-20 | 5.24025256410256 | 10.43472188 | 7.36695305642016 | 9.13868476995567e-07 | 0.000130671979100219 | 5.9521260115821 | Up |
| CXCL10 | 5.2199582051282 | 7.591689375 | 7.77227590537242 | 4.40552400463954e-07 | 7.92626347694503e-05 | 6.66243646057223 | Up |
| MYH2 | -5.091433077 | 4.396910625 | -12.86589545 | 2.31463592951565e-10 | 8.50481051419764e-07 | 13.7654556236963 | Down |
| CXCL9 | 5.07855846153846 | 8.54881875 | 6.90727111470775 | 2.1472744166702e-06 | 0.000233862265557628 | 5.11742067147619 | Up |
| MYF6 | -5.025623333 | 4.421024375 | -7.258400525 | 1.11525564708749e-06 | 0.000151139698194456 | 5.75780975995924 | Down |
| SNORD29 | 4.95473461538462 | 8.737751875 | 6.07531136280284 | 1.08393991554647e-05 | 0.000686505098142434 | 3.52878483776153 | Up |
| SNORD13P3 | 4.89098102564102 | 11.63804875 | 13.8312565036034 | 7.25539564849289e-11 | 5.73269187482556e-07 | 14.7980041432167 | Up |
| NRAP | -4.664707436 | 4.608831875 | -8.424831967 | 1.42389370849184e-07 | 4.42559181951486e-05 | 7.75612155957295 | Down |
| SNORD13 | 4.62043025641025 | 11.83564625 | 12.4337199978199 | 3.98273252604728e-10 | 1.1603193373073e-06 | 13.2757091404067 | Up |
| IGHV4-59 | 4.59381384615385 | 11.09973375 | 6.74028381040281 | 2.94949818107093e-06 | 0.000290058878085317 | 4.80653651985258 | Up |
| SNORD45A | 4.59067 | 8.874869375 | 8.51231236030337 | 1.22889575493641e-07 | 4.0340666704652e-05 | 7.89814475151203 | Up |
| SNORA16A | 4.58369384615385 | 9.86717125 | 7.07666632429164 | 1.56214956764084e-06 | 0.000191737164572444 | 5.42862136185749 | Up |
| IGKV1D-43 | 4.58269538461539 | 9.87655 | 7.33560087068119 | 9.67816718332827e-07 | 0.000137542099110873 | 5.89618109659061 | Up |
| SNORA71D | 4.58062487179487 | 9.952604375 | 7.92940687578036 | 3.33959234870158e-07 | 6.54083015724266e-05 | 6.93137066694547 | Up |
| IGHV1OR15-1 | 4.5562558974359 | 8.02055125 | 5.08999813730383 | 8.28124004415966e-05 | 0.00245653504298625 | 1.52796054722126 | Up |
| LYZ | 4.55471435897436 | 10.30988875 | 7.79431067926412 | 4.23684081012854e-07 | 7.76598901022434e-05 | 6.70036518069382 | Up |
| MYOT | -4.544521795 | 3.984609375 | -6.433425862 | 5.33795328096266e-06 | 0.000430490232247048 | 4.22471182373835 | Down |
| MYH1 | -4.543078462 | 3.47991875 | -8.302544838 | 1.75223115688672e-07 | 4.8046178321834e-05 | 7.55578824344012 | Down |
| IGKC | 4.52686692307692 | 10.75439938 | 7.70469631407142 | 4.96789787926408e-07 | 8.45314912523827e-05 | 6.54567108595167 | Up |
| IGKV1OR2-3 | 4.51492666666667 | 9.34199125 | 6.85856234746588 | 2.35466979355345e-06 | 0.000247208508461037 | 5.02715880269686 | Up |
| FOSB | 4.48031076923077 | 9.2127625 | 6.1828746795935 | 8.74629518296512e-06 | 0.00058409713991223 | 3.73969216619881 | Up |
| SNORA38B | 4.47048282051282 | 9.489570625 | 4.56955918116502 | 0.000253083531912297 | 0.00494435698095549 | 0.43018144610945 | Up |
| IGKV1D-33 | 4.41197923076923 | 10.58041313 | 6.39115761203418 | 5.79823323707236e-06 | 0.000450464740188152 | 4.14350972597248 | Up |
| TRIM63 | -4.410997436 | 4.32431125 | -8.714639431 | 8.77337793051027e-08 | 3.14586337579081e-05 | 8.22253796425985 | Down |
| SNORA22 | 4.35173076923077 | 9.20380125 | 7.58030203535753 | 6.20724851853244e-07 | 9.90906446722161e-05 | 6.32900168495665 | Up |
| ASB5 | -4.328873077 | 4.054950625 | -8.488163641 | 1.27976458582611e-07 | 4.14270461136795e-05 | 7.85904665009584 | Down |
| RNU4ATAC | 4.32603076923077 | 9.49739 | 6.4022541890544 | 5.67355567459611e-06 | 0.000445230848847851 | 4.1648520973391 | Up |
| ATP2A1 | -4.316545897 | 5.347303125 | -12.78653349 | 2.55432589348194e-10 | 8.50481051419764e-07 | 13.6768420626249 | Down |
| MT-TQ | 4.31298102564103 | 10.41564375 | 7.86883026978707 | 3.71454856713254e-07 | 7.09631011919329e-05 | 6.82811517823576 | Up |
| IGKV3OR2-268 | 4.29183717948718 | 9.772354375 | 6.77565021966835 | 2.75684857989215e-06 | 0.00027458918739977 | 4.8727183051162 | Up |
| CXCL13 | 4.25028897435897 | 7.003343125 | 5.14658225113527 | 7.34580721705498e-05 | 0.00228278305077201 | 1.6458873292001 | Up |
| MYL1 | -4.247788718 | 4.380075 | -9.466752683 | 2.61800024599025e-08 | 1.62560736560291e-05 | 9.37968420666721 | Down |
| IGJ | 4.24457 | 10.97222313 | 5.30625627804547 | 5.24763970110097e-05 | 0.00183919907539188 | 1.97687910077195 | Up |
| IGKV2D-26 | 4.23870051282051 | 8.7367875 | 7.04841382443225 | 1.64682968546312e-06 | 0.000195829895301475 | 5.37701016639377 | Up |
| MYH7 | -4.173247692 | 5.57192625 | -7.27301619 | 1.0856478317841e-06 | 0.0001488423177376 | 5.78407352240164 | Down |
| ACTA1 | -4.146381282 | 7.323391875 | -9.704352817 | 1.81130743313827e-08 | 1.43454688099198e-05 | 9.72977614916436 | Down |
| MS4A1 | 4.14269871794872 | 7.837199375 | 3.52777577822934 | 0.00248540899279472 | 0.0220507907860931 | -1.796733467 | Up |
| ACTC1 | -4.139169231 | 5.290155 | -5.078203156 | 8.49112126231558e-05 | 0.00249561870442357 | 1.50333874693645 | Down |
| LOC642131 | 4.13865769230769 | 8.929259375 | 5.12746092303851 | 7.64916433825886e-05 | 0.00235196666532717 | 1.60607243028269 | Up |
| IGKV2D-28 | 4.07943384615385 | 11.90056 | 9.69631468230764 | 1.83383055709592e-08 | 1.43454688099198e-05 | 9.71805032790498 | Up |
| TNNT1 | -4.055996667 | 6.370279375 | -6.916376705 | 2.11065665579965e-06 | 0.000231321089583129 | 5.13425569108019 | Down |
| LOC102724453 | 4.01411756410256 | 11.75137219 | 9.45888754626881 | 2.6504088854383e-08 | 1.62560736560291e-05 | 9.36797102667544 | Up |
| EGR2 | 4.0133641025641 | 9.373925 | 6.38465885467049 | 5.87256477099481e-06 | 0.000453218103038331 | 4.13100235914434 | Up |
| CD79A | 3.97429205128205 | 8.513295625 | 4.27440657934078 | 0.000481520965377352 | 0.00755744723235686 | -0.200095748 | Up |
| IL2RG | 3.97282820512821 | 8.84193625 | 5.0544033477866 | 8.93134902906428e-05 | 0.00256042991169005 | 1.45361596306291 | Up |
| CCL5 | 3.96938717948718 | 8.58993375 | 8.25100749671697 | 1.91344632889687e-07 | 5.03230392415376e-05 | 7.47072602941365 | Up |
| IGKV1D-27 | 3.95496435897436 | 8.481331875 | 4.48652121432123 | 0.000303111251936747 | 0.00556991411978112 | 0.253260250366241 | Up |
| IGKV1-13 | 3.88478461538462 | 10.8666375 | 7.1981251036814 | 1.24651676308221e-06 | 0.000160511415453906 | 5.64916589422856 | Up |
| FDCSP | 3.88119717948718 | 6.554539375 | 3.72185834885543 | 0.00162175590276279 | 0.016591194906219 | -1.383535369 | Up |
| CASQ1 | -3.844333077 | 4.895799375 | -6.828624376 | 2.49236124250719e-06 | 0.000255900720172313 | 4.97150898340039 | Down |
| IGKV2D-24 | 3.82654282051282 | 9.044309375 | 7.28748213086891 | 1.05714741642412e-06 | 0.000145802496023061 | 5.81003735865104 | Up |
| EVI2B | 3.82246717948718 | 9.67950125 | 6.17430289670246 | 8.89662620317268e-06 | 0.000587404155573217 | 3.72294334190654 | Up |
| C8orf22 | -3.814392564 | 3.436229375 | -5.346576236 | 4.82253291792201e-05 | 0.00173187634388303 | 2.06002388428709 | Down |
| IGHV3-52 | 3.74175692307692 | 12.4670975 | 6.21421182953232 | 8.21868934540376e-06 | 0.000555226065429929 | 3.80083657434678 | Up |
| SNORA45A | 3.71638128205128 | 11.05997313 | 5.94580367771247 | 1.40628910495476e-05 | 0.000809007794229821 | 3.27275714082297 | Up |
| CD27 | 3.68525333333333 | 7.903875 | 6.54509501506508 | 4.29515990167234e-06 | 0.000386514640263619 | 4.43801386087358 | Up |
| SNORD82 | 3.6703941025641 | 7.093971875 | 3.89150773097289 | 0.00111629770004852 | 0.0129504980064862 | -1.020671993 | Up |
| SLAMF7 | 3.64327256410256 | 7.507555625 | 4.52436619131944 | 0.000279172060240481 | 0.00530290400002029 | 0.33393917216168 | Up |
| IGKV1OR9-2 | 3.64072384615385 | 7.722268125 | 8.22832718340199 | 1.98922877637535e-07 | 5.03945164032395e-05 | 7.4331729051715 | Up |
| AKR1C3 | -3.635941538 | 5.5516675 | -12.33857339 | 4.49740468190954e-10 | 1.16467789912517e-06 | 13.1654852239284 | Down |
| IGKV1D-16 | 3.63379461538461 | 11.15224813 | 8.09830411700661 | 2.48852447211676e-07 | 5.6862784187868e-05 | 7.21647298848077 | Up |
| IGHV3-43 | 3.62628564102564 | 12.40926375 | 6.2452314361348 | 7.72877803788133e-06 | 0.000535523493815623 | 3.86122677701567 | Up |
| SNORD80 | 3.62510076923077 | 6.107224375 | 4.31311043663948 | 0.00044243570250366 | 0.00720101181442234 | -0.117251405 | Up |
| IGSF6 | 3.61893307692308 | 6.667773125 | 7.9818773699891 | 3.04672394616045e-07 | 6.17478217505754e-05 | 7.0203810987618 | Up |
| FLNC | -3.615900256 | 6.268054375 | -6.037746592 | 1.16870152046518e-05 | 0.000728313538435348 | 3.45475545719465 | Down |
| SNORD32A | 3.61413358974359 | 9.979496875 | 7.80651036147699 | 4.14635635657861e-07 | 7.7311302082222e-05 | 6.72133434648086 | Up |
| HLA-DPB1 | 3.61387273504274 | 11.0143660416667 | 7.07006696072516 | 1.58151599517118e-06 | 0.000191981215101326 | 5.41657623658004 | Up |
| GALNT15 | -3.598527692 | 5.68270625 | -8.089350826 | 2.52739865585293e-07 | 5.71903693902566e-05 | 7.20146237657238 | Down |
| DDX3Y | -3.598370256 | 4.7248075 | -3.847891317 | 0.00122879086358212 | 0.0138555532934246 | -1.114063348 | Down |
| IGHV3OR16-7 | 3.58192179487179 | 11.30522813 | 6.29603365871729 | 6.99064553184652e-06 | 0.000499788268131125 | 3.9598399198967 | Up |
| RGS1 | 3.58178256410256 | 8.242415 | 4.14948188987284 | 0.000633144230527932 | 0.00901447317099237 | -0.467731892 | Up |
| TNNC1 | -3.577455641 | 6.026660625 | -5.446419292 | 3.91540769909817e-05 | 0.00150837036765093 | 2.26512245090997 | Down |
| SMPX | -3.577432051 | 3.458513125 | -5.520896254 | 3.3543219181926e-05 | 0.00136676889768033 | 2.41735951353412 | Down |
| IGKV1D-42 | 3.56836051282051 | 12.20068625 | 8.31970598925354 | 1.70174963410336e-07 | 4.77863599060808e-05 | 7.58402923128773 | Up |
| RPS4Y1 | -3.512349231 | 4.62944625 | -4.176304461 | 0.000596967036366539 | 0.00866345623698314 | -0.410244326 | Down |
| SNORA20 | 3.50617717948718 | 9.273765625 | 4.65882005874992 | 0.000208597577864084 | 0.00436817946745571 | 0.619913148700241 | Up |
| MT-TA | 3.48164794871795 | 11.06487563 | 6.95621976301942 | 1.95789386625241e-06 | 0.000220447499230652 | 5.20777747849835 | Up |
| ATP1A2 | -3.481328205 | 5.3441675 | -5.624394962 | 2.70858105175075e-05 | 0.00120505257288657 | 2.62781353402995 | Down |
| IGKV6-21 | 3.47211692307692 | 7.261085 | 3.80936320376928 | 0.00133757027434886 | 0.0146017566202571 | -1.196509486 | Up |
| MYOM1 | -3.471127692 | 5.33145875 | -6.354528523 | 6.23029850550277e-06 | 0.000468417958928236 | 4.0729359610673 | Down |
| MIR8071-1 | 3.46992538461539 | 8.744234375 | 5.94632106173851 | 1.40482104897292e-05 | 0.000809007794229821 | 3.27378446228189 | Up |
| ANKRD1 | -3.460850769 | 4.44435875 | -8.000884459 | 2.94735455009328e-07 | 6.13339218741287e-05 | 7.05252674231816 | Down |
| IGHV3-73 | 3.44001897435898 | 11.43508875 | 5.92983012045323 | 1.45240102797872e-05 | 0.000817659680171499 | 3.24102236624131 | Up |
| IGHV3-74 | 3.42850435897436 | 11.78286313 | 6.41932333406582 | 5.48716359665921e-06 | 0.000435326220186843 | 4.19764752128422 | Up |
| DES | -3.385047949 | 6.903811875 | -6.296604399 | 6.98278032877252e-06 | 0.000499788268131125 | 3.96094573869169 | Down |
| IGHV3-7 | 3.37546162393163 | 12.47888813 | 6.43677153147099 | 5.30317531495395e-06 | 0.000429170510644555 | 4.23112837388572 | Up |
| HLA-DQA1 | 3.36117333333334 | 9.55854 | 7.07635680283498 | 1.56305235632061e-06 | 0.000191737164572444 | 5.42805656767036 | Up |
| SNORA24 | 3.34370923076924 | 8.67615375 | 4.39064483189272 | 0.000373517646471775 | 0.00640662100416746 | 0.0485605438995851 | Up |
| LMOD3 | -3.340557179 | 3.182500625 | -5.229367984 | 6.16808594902625e-05 | 0.00207146367743451 | 1.81783281526108 | Down |
| MPEG1 | 3.33871051282051 | 8.234505625 | 5.61122488790455 | 2.78308736270656e-05 | 0.00121927475869552 | 2.60110623875959 | Up |
| CD22 | 3.33757846153846 | 8.0138625 | 3.9655599216006 | 0.000948442702876469 | 0.0116527960337068 | -0.862008872 | Up |
| SNORA7B | 3.33654948717949 | 8.858293125 | 8.41833336602814 | 1.43961304283809e-07 | 4.42559181951486e-05 | 7.74552837710011 | Up |
| SNORD116-21 | -3.319191026 | 8.006790625 | -2.976815451 | 0.00825593812208479 | 0.0490927583879987 | -2.946337428 | Down |
| EIF1AY | -3.305077436 | 3.74323125 | -3.790161802 | 0.00139532967654276 | 0.0149935217939982 | -1.23757791 | Down |
| GPR183 | 3.27532538461538 | 7.733061875 | 6.04344776515225 | 1.15540917578361e-05 | 0.000723901119892164 | 3.46600318520622 | Up |
| MYPN | -3.270874103 | 3.914318125 | -5.555994457 | 3.11924610243125e-05 | 0.0013005414831729 | 2.48887398786737 | Down |
| SAMD9L | 3.26157 | 8.216375625 | 9.66918735095712 | 1.91203210389585e-08 | 1.43454688099198e-05 | 9.67841706496823 | Up |
| TRDN | -3.260013333 | 3.3703525 | -6.232974713 | 7.91864408782443e-06 | 0.000546035022943562 | 3.83738093961346 | Down |
| PYGM | -3.249177436 | 6.56745 | -6.300111416 | 6.93465173098575e-06 | 0.000499788268131125 | 3.96773963115763 | Down |
| CMYA5 | -3.23246359 | 6.58846 | -5.245455627 | 5.96267502581794e-05 | 0.00201994283178399 | 1.85116337231539 | Down |
| ENO3 | -3.217636923 | 5.26837 | -8.873125601 | 6.76171335814115e-08 | 2.81420095068207e-05 | 8.4727008411731 | Down |
| GPR174 | 3.21195564102564 | 6.338170625 | 3.66921383030543 | 0.00182100286317877 | 0.0178854250872767 | -1.495865835 | Up |
| EGR1 | 3.21097076923077 | 11.19503375 | 5.74692030180405 | 2.10645231489198e-05 | 0.00104015008693194 | 2.87524112596873 | Up |
| TNNT3 | -3.205923077 | 6.5447375 | -9.649949469 | 1.96960141552938e-08 | 1.43454688099198e-05 | 9.65025358056849 | Down |
| CD180 | 3.20481846153846 | 6.441795 | 3.57818343814488 | 0.00222474538220655 | 0.0205009893993126 | -1.689681093 | Up |
| SMYD1 | -3.202483333 | 3.502745625 | -5.443931788 | 3.93573170781279e-05 | 0.00151369800188107 | 2.26002653043069 | Down |
| DOCK10 | 3.18871923076923 | 7.732324375 | 4.52818800210357 | 0.000276863815574423 | 0.00527625915747594 | 0.342082416388008 | Up |
| RNU2-2P | 3.18789153846154 | 9.137201875 | 5.50596107392268 | 3.45980713102379e-05 | 0.00139511634606871 | 2.38688345351932 | Up |
| MLIP | -3.167944103 | 4.23312875 | -5.100317663 | 8.10197021673941e-05 | 0.00242572348951105 | 1.54949117355405 | Down |
| HLA-DRA | 3.16522606837606 | 11.3345972916667 | 6.36484851028382 | 6.10529740374122e-06 | 0.000463505428628654 | 4.0928388510245 | Up |
| HIST1H3I | 3.16342974358974 | 8.56256 | 4.62106507745118 | 0.000226353057296766 | 0.00457952318265254 | 0.539722397434441 | Up |
| SLAMF6 | 3.14297769230769 | 7.571839375 | 3.59835397661102 | 0.00212822145249894 | 0.0198966936997163 | -1.646786828 | Up |
| TPM2 | -3.142598205 | 7.271985625 | -6.641721447 | 3.56362655360433e-06 | 0.000330906151732494 | 4.62113641994374 | Down |
| SNORA23 | 3.14074743589743 | 10.55174063 | 6.42172400971707 | 5.46146173798172e-06 | 0.000435326220186843 | 4.20225668189005 | Up |
| GZMK | 3.1169341025641 | 7.434625625 | 3.07733946004384 | 0.0066458032471137 | 0.0424366400768436 | -2.740233106 | Up |
| SNORD35A | 3.10116153846154 | 9.48027375 | 6.71032512038389 | 3.12360180073961e-06 | 0.000300833831280323 | 4.7503320162102 | Up |
| RN7SL600P | 3.06720820512821 | 6.34373 | 4.66204084644654 | 0.000207150089521848 | 0.00434567699053619 | 0.626749726830285 | Up |
| CD37 | 3.06479794871795 | 8.529715 | 4.29276061353722 | 0.000462568658772437 | 0.00739491095100411 | -0.160804105 | Up |
| ART3 | -3.042948718 | 3.2774575 | -5.471866034 | 3.71358720821468e-05 | 0.00145554939145789 | 2.3172113110169 | Down |
| GBP1 | 3.03417974358975 | 9.838044375 | 9.28618427260363 | 3.47870973546014e-08 | 1.89976364282001e-05 | 9.10874001801114 | Up |
| CD3G | 3.02831512820513 | 7.508499375 | 4.12227857523248 | 0.000672094933510405 | 0.00934079702762493 | -0.52604386 | Up |
| SNORA60 | 3.01835538461539 | 9.32277375 | 4.54012339712126 | 0.000269779248814463 | 0.00518363145269472 | 0.367508395513515 | Up |
| IGKV1OR9-1 | 3.01524676923077 | 7.36862 | 7.9748954483553 | 3.08409741081996e-07 | 6.19664296155006e-05 | 7.00855990640356 | Up |
| SELPLG | 3.0111317948718 | 7.37832125 | 5.93970839888974 | 1.42370387200668e-05 | 0.000809007794229821 | 3.26065162201385 | Up |
| CD96 | 3.00372974358974 | 7.47485375 | 5.37921923106214 | 4.50434556034872e-05 | 0.0016600762020223 | 2.12720456710534 | Up |
| CASQ2 | -3.00351 | 5.423488125 | -4.70236495 | 0.000189869316977231 | 0.00413964842917523 | 0.712283994136231 | Down |
| CECR1 | 3.00283025641026 | 7.48977625 | 4.95680264652592 | 0.000109952412656444 | 0.00289239377176495 | 1.24914902596035 | Up |
| CD52 | 2.98741769230769 | 8.135886875 | 4.11215657364823 | 0.000687196973876648 | 0.00943256765026092 | -0.547742616 | Up |
| CCL19 | 2.97766846153846 | 8.755885625 | 3.06283139986579 | 0.0068576967496475 | 0.0432798099496437 | -2.770102517 | Up |
| IL2RB | 2.97170102564102 | 7.23265375 | 4.50030556576724 | 0.000294159501425588 | 0.00549040756306294 | 0.282654675452972 | Up |
| ADH1B | -2.970256923 | 6.68837625 | -4.347697133 | 0.000410229315094682 | 0.00682456434469076 | -0.043259253 | Down |
| SNORD41 | 2.96417076923077 | 10.38640875 | 5.04482955240475 | 9.11496045362141e-05 | 0.00258396205838301 | 1.43359893507396 | Up |
| PLA2G2A | -2.941038974 | 7.3084625 | -3.2350516 | 0.00471798879805711 | 0.0341285428045677 | -2.413134252 | Down |
| TMA7 | 2.9350758974359 | 9.1566525 | 9.52602788357411 | 2.38670961960199e-08 | 1.58934403154468e-05 | 9.46770243243853 | Up |
| PTPRC | 2.93311948717948 | 8.21306625 | 3.35393410447788 | 0.00363899439771704 | 0.0286469178846321 | -2.164042226 | Up |
| SNORD46 | 2.92754102564103 | 9.74764375 | 4.61090460963325 | 0.000231388781521214 | 0.00465714881771584 | 0.518126279618597 | Up |
| ZFP36 | 2.91967153846154 | 10.05004313 | 6.45824441985588 | 5.08548035663355e-06 | 0.000421516094201296 | 4.27227252469227 | Up |
| P2RY10 | 2.91182461538461 | 5.6297875 | 3.47228025235251 | 0.00280753766459527 | 0.0239601905341347 | -1.914330178 | Up |
| SNORA14A | 2.90800153846154 | 8.16643125 | 6.48506492873782 | 4.82650177357941e-06 | 0.000406440859209732 | 4.32357074734497 | Up |
| EEF1A2 | -2.877458462 | 6.296595 | -6.949117635 | 1.98425910180905e-06 | 0.000222341956182036 | 5.19468904920956 | Down |
| BLNK | 2.87653358974359 | 7.207176875 | 8.75101175786121 | 8.26210079932848e-08 | 3.14586337579081e-05 | 8.28025421213598 | Up |
| SNORD104 | 2.86600025641025 | 9.123151875 | 5.3543910333745 | 4.7443159190472e-05 | 0.00171435304070129 | 2.07611800166797 | Up |
| PLAC8 | 2.86258461538462 | 6.97273 | 3.48379507674899 | 0.00273746198040909 | 0.0235605710403968 | -1.889953959 | Up |
| SPTB | -2.856760769 | 5.008211875 | -5.972914326 | 1.33145427605707e-05 | 0.00078888047801904 | 3.32654003842196 | Down |
| POPDC3 | -2.847586154 | 3.90340625 | -4.584859064 | 0.000244824149016736 | 0.00483159732526086 | 0.462737378165403 | Down |
| ADAMDEC1 | 2.84360871794872 | 6.08071875 | 3.17836385432678 | 0.00533775470129269 | 0.0369269957919349 | -2.531185121 | Up |
| SCARNA4 | 2.84341435897436 | 5.4885975 | 4.8620041154373 | 0.000134677067131862 | 0.00329718319710326 | 1.04973639018419 | Up |
| IGLV6-57 | 2.84229230769231 | 6.8452625 | 3.96456245699482 | 0.000950526107005696 | 0.0116563183213946 | -0.864146669 | Up |
| MURC | -2.840926667 | 4.41278375 | -6.299557854 | 6.94222568713222e-06 | 0.000499788268131125 | 3.96666736897862 | Down |
| SNORD36B | 2.82928794871795 | 5.835893125 | 5.76083050532094 | 2.04742082826527e-05 | 0.00102182520865907 | 2.90321120172404 | Up |
| IDO1 | 2.82799358974359 | 6.209878125 | 5.16380002754802 | 7.08319656710794e-05 | 0.00223696561503502 | 1.68170688201127 | Up |
| PTPN22 | 2.8268658974359 | 5.878651875 | 3.66152039420626 | 0.00185209696643015 | 0.018121502462352 | -1.512267945 | Up |
| RASGRP1 | 2.82283538461538 | 6.69268375 | 3.3538155555083 | 0.00363993862880598 | 0.0286469178846321 | -2.164291553 | Up |
| RNU2-1 | 2.81466023310023 | 12.0744302272727 | 9.22850219717882 | 3.81240835059064e-08 | 1.89976364282001e-05 | 9.0212862521206 | Up |
| GAPT | 2.80604025641025 | 6.131814375 | 3.48685336414966 | 0.00271914333832597 | 0.0234498963295689 | -1.883477565 | Up |
| TRAT1 | 2.80564743589744 | 6.152961875 | 3.65780371775637 | 0.00186730742212551 | 0.0182325858287834 | -1.520190416 | Up |
| SNORD24 | 2.80495307692307 | 7.538494375 | 3.71373551255133 | 0.00165101626700893 | 0.0168035965655795 | -1.400877697 | Up |
| SNORA54 | 2.80388333333333 | 7.899861875 | 5.3140395234121 | 5.16268230881609e-05 | 0.0018203727166653 | 1.99294315781488 | Up |
| CCL2 | 2.80338641025641 | 8.177728125 | 4.03301386688266 | 0.000817694668942772 | 0.0105995604277248 | -0.717414688 | Up |
| HLA-DMA | 2.80251162393162 | 9.20588625 | 7.96688516625433 | 3.12756508165641e-07 | 6.23027003061248e-05 | 6.99498893894554 | Up |
| HLA-DQA2 | 2.79294179487179 | 7.664236875 | 5.81944451103084 | 1.81680251926703e-05 | 0.000934487582232039 | 3.02079625705065 | Up |
| CD84 | 2.78487948717949 | 6.68919125 | 4.69292767105228 | 0.000193777401762734 | 0.0041666657912392 | 0.692275920430733 | Up |
| IGHV3OR16-8 | 2.77519205128205 | 8.856916875 | 6.78089729269679 | 2.72939847533335e-06 | 0.000273021846629161 | 4.88252173671042 | Up |
| IGHV3-35 | 2.77299512820513 | 11.25610188 | 6.52808000188489 | 4.43930516005552e-06 | 0.000391886727860917 | 4.40562845129096 | Up |
| SEPT6 | 2.77124307692308 | 7.651125 | 4.19698801383046 | 0.000570499822520859 | 0.0084029669071402 | -0.3659214 | Up |
| PRDM1 | 2.76342948717949 | 9.079793125 | 6.51841621660523 | 4.52339609652544e-06 | 0.000391921162906017 | 4.38721643905659 | Up |
| GBP5 | 2.75846 | 6.36373875 | 3.43858151744219 | 0.00302298953939911 | 0.0253033303773237 | -1.98559158 | Up |
| STAC3 | -2.75292 | 5.7482125 | -5.323613431 | 5.0601113484941e-05 | 0.00179506872449546 | 2.01269383516915 | Down |
| HIST1H2BM | 2.74935512820513 | 8.400044375 | 3.21405702593258 | 0.00493881762160486 | 0.0351263418696199 | -2.456913588 | Up |
| SNORA14B | 2.74673282051282 | 7.11670375 | 3.53450205651789 | 0.00244894652366185 | 0.0218353468351135 | -1.782461105 | Up |
| ANKRD23 | -2.743122821 | 6.191429375 | -7.523929817 | 6.87112196442497e-07 | 0.000106056450082684 | 6.23006912350619 | Down |
| SCIMP | 2.73566487179487 | 7.080554375 | 3.66090695323853 | 0.00185459893240663 | 0.0181313495459737 | -1.513575617 | Up |
| SNORA37 | 2.73298205128205 | 8.11487125 | 6.45677494146959 | 5.10007888465979e-06 | 0.000421516094201296 | 4.26945895796402 | Up |
| TCAP | -2.732421795 | 5.683100625 | -7.790567684 | 4.26501305748795e-07 | 7.76598901022434e-05 | 6.69392728597552 | Down |
| ATP5G1 | 2.73124128205128 | 10.07782688 | 6.3886181243369 | 5.82716280467851e-06 | 0.000451208250792831 | 4.13862299665806 | Up |
| SNORA10 | 2.71795333333334 | 8.32426375 | 4.82463785354168 | 0.000145920889521587 | 0.00351340720256159 | 0.970927284934149 | Up |
| TNNC2 | -2.711263077 | 5.23996875 | -8.559059495 | 1.13633319611728e-07 | 3.83833591331964e-05 | 7.97359972492756 | Down |
| CSRP3 | -2.698869231 | 3.80774875 | -7.53480356 | 6.73753878732115e-07 | 0.000104687877677396 | 6.24918857074577 | Down |
| P2RY13 | 2.69245051282051 | 6.468809375 | 8.67054121253792 | 9.43793002912663e-08 | 3.33287629074022e-05 | 8.15231784802812 | Up |
| LCP2 | 2.68597923076923 | 8.246078125 | 4.80404799622158 | 0.000152521249453161 | 0.00360894696548713 | 0.927453348801115 | Up |
| RNU6-247P | -2.679951026 | 3.693843125 | -3.552505624 | 0.00235394340069628 | 0.0212978877484582 | -1.744240441 | Down |
| SNORA71B | 2.67721974358974 | 7.339464375 | 3.1665591198799 | 0.00547651931360632 | 0.0375084442087048 | -2.555703427 | Up |
| SNORA68 | 2.67550076923077 | 10.16572438 | 5.43518296201634 | 4.00807856863799e-05 | 0.00153645209209286 | 2.24209788874949 | Up |
| CCL18 | 2.67289794871795 | 7.98851625 | 4.03104251537298 | 0.000821245716379981 | 0.0106322764936912 | -0.721640963 | Up |
| LGR5 | -2.663712821 | 4.13148 | -3.753600332 | 0.00151229439827502 | 0.0157927480353094 | -1.315733375 | Down |
| SGCG | -2.652571026 | 3.594999375 | -5.617831198 | 2.74545379586719e-05 | 0.00120505257288657 | 2.61450570217065 | Down |
| SORBS1 | -2.647369487 | 6.295745625 | -5.027696408 | 9.45324585337642e-05 | 0.00264897544384632 | 1.39775495145915 | Down |
| SNORD81 | 2.63885358974359 | 5.932751875 | 4.64820094051094 | 0.000213443347344167 | 0.00443068484485024 | 0.597367713829108 | Up |
| TMEM156 | 2.63334974358974 | 5.39629 | 3.16091620480441 | 0.00554409420005457 | 0.0378267574709226 | -2.567415526 | Up |
| TYROBP | 2.63242307692308 | 9.83526375 | 6.06616181517353 | 1.10398211317248e-05 | 0.000697303824165606 | 3.51077140517032 | Up |
| PPP1R27 | -2.63173 | 4.881149375 | -8.358524483 | 1.59308083258109e-07 | 4.64124187062095e-05 | 7.64775683489897 | Down |
| SLC22A3 | -2.626007179 | 6.0685325 | -3.916939188 | 0.00105553272944003 | 0.0124721014796423 | -0.966195336 | Down |
| RYR1 | -2.624620513 | 5.2437325 | -5.843677543 | 1.72944346923808e-05 | 0.000916094066762091 | 3.06927973315152 | Down |
| LRRN3 | 2.62219487179487 | 6.89417 | 3.64100161965675 | 0.00193763771493237 | 0.0186228957616201 | -1.555994596 | Up |
| CYBB | 2.58691538461539 | 9.11920875 | 3.30484159390358 | 0.0040514123704817 | 0.030588360258768 | -2.267138276 | Up |
| TNFSF8 | 2.58219564102564 | 7.532240625 | 3.17110011817099 | 0.00542272653670178 | 0.037282444658085 | -2.546274548 | Up |
| MYOZ1 | -2.581591282 | 5.28332375 | -4.348774903 | 0.000409264758788864 | 0.00681825141750684 | -0.040954209 | Down |
| TNNI2 | -2.578522821 | 5.960366875 | -7.812731946 | 4.10098876372417e-07 | 7.70820525129994e-05 | 6.73201987680269 | Down |
| FPR3 | 2.57343051282051 | 6.638495625 | 4.14530278621858 | 0.000638976676066079 | 0.00906981083378326 | -0.476689572 | Up |
| ANKRD2 | -2.573408974 | 6.013011875 | -4.954381077 | 0.000110522371671336 | 0.00290083886998178 | 1.24406490718504 | Down |
| MYOM2 | -2.573192308 | 4.50632125 | -6.864589088 | 2.3279194658601e-06 | 0.000245505968284169 | 5.03834570829863 | Down |
| CD3E | 2.56971025641025 | 8.15984625 | 3.48631880266725 | 0.00272233648847429 | 0.0234650504944047 | -1.884609647 | Up |
| UBD | 2.56092525641025 | 6.749803438 | 3.65497029479212 | 0.0018789867306339 | 0.0183006868913014 | -1.526229549 | Up |
| FOS | 2.56090666666667 | 10.91904 | 4.72183592954758 | 0.000182057808469303 | 0.00403731811797721 | 0.753544840755848 | Up |
| RBM24 | -2.547102564 | 4.8301925 | -3.641728045 | 0.00193454317164332 | 0.0186008241342784 | -1.554447016 | Down |
| ITGAL | 2.54588051282052 | 6.95779125 | 3.47878461863057 | 0.00276773850090018 | 0.0237160592795884 | -1.90056241 | Up |
| RAC2 | 2.54352025641026 | 8.511486875 | 3.98392672254087 | 0.000910889405268055 | 0.0113773308513304 | -0.822642244 | Up |
| HLA-DPA1 | 2.54162888888889 | 11.1508345833333 | 4.49669215442116 | 0.00029647982632427 | 0.0055104109347207 | 0.274950194361778 | Up |
| SNORD59B | 2.53841538461538 | 6.0805925 | 4.49946616699542 | 0.000294696866237257 | 0.00549040756306294 | 0.280864977100385 | Up |
| SNORD117 | 2.53453282051282 | 6.02273125 | 5.01268110411504 | 9.76026496315785e-05 | 0.00268574374848076 | 1.36631892831383 | Up |
| WEE1 | 2.52615162393162 | 7.65988041666667 | 5.62547023465596 | 2.7025893368506e-05 | 0.00120505257288657 | 2.62999310801375 | Up |
| SCARNA17 | -2.523580513 | 9.4579575 | -7.6523514 | 5.45464143985689e-07 | 9.01640624388259e-05 | 6.45477185233162 | Down |
| ADAM28 | 2.51460384615385 | 6.589715625 | 3.18651727403013 | 0.005243929269189 | 0.036549120656994 | -2.514237211 | Up |
| CD3D | 2.5140958974359 | 7.20142625 | 3.19171803613269 | 0.00518492812604149 | 0.0363234437519202 | -2.503421145 | Up |
| SNORA71A | 2.51261641025641 | 7.4381275 | 4.6160831726367 | 0.000228808107659386 | 0.00461637882831125 | 0.529134142640869 | Up |
| LRMP | 2.50712717948718 | 7.5633975 | 3.0615541568695 | 0.00687666366603341 | 0.0433334157783315 | -2.7727302 | Up |
| ZFY | -2.506587949 | 4.214210625 | -4.090555699 | 0.000720578967682653 | 0.00977246911270532 | -0.594050947 | Down |
| FYB | 2.49264076923077 | 6.166720625 | 3.52538985172418 | 0.00249847190583562 | 0.0221414010301562 | -1.801795161 | Up |
| MMP9 | 2.49150179487179 | 7.462171875 | 3.71792520307801 | 0.00163585881177554 | 0.0166857598801105 | -1.391933111 | Up |
| SNORD48 | 2.48857538461538 | 8.0859375 | 3.8704251040506 | 0.00116932248996549 | 0.0134055087425605 | -1.065820824 | Up |
| EVI2A | 2.48790743589744 | 5.974568125 | 3.28756255250999 | 0.00420726197117928 | 0.0314290560135498 | -2.303348949 | Up |
| CXCL11 | 2.48499230769231 | 5.77151625 | 4.18931024396572 | 0.000580183414874521 | 0.0085206898868812 | -0.382373333 | Up |
| TNNI1 | -2.480816923 | 5.79246625 | -5.923514395 | 1.47106086634936e-05 | 0.000824183067596262 | 3.22846549941406 | Down |
| TOX | 2.47512487179487 | 7.124555625 | 5.15100565624671 | 7.27740259331214e-05 | 0.00227365177268534 | 1.65509258414748 | Up |
| KLRC4-KLRK1 | 2.4656617948718 | 5.673526875 | 4.52689259407324 | 0.000277644019106657 | 0.0052868048638226 | 0.339322340877693 | Up |
| CKMT2 | -2.465448205 | 6.3964 | -3.81180439 | 0.00133040046467885 | 0.0145384714798236 | -1.191287186 | Down |
| HIST1H2BH | 2.46425717948718 | 8.307405625 | 4.10455990244609 | 0.000698755453359531 | 0.00954528223549247 | -0.564028214 | Up |
| XIRP1 | -2.451484872 | 4.925511875 | -8.020685384 | 2.84742239603254e-07 | 6.13339218741287e-05 | 7.08595972204226 | Down |
| OLR1 | 2.45065923076923 | 6.313850625 | 3.35769881273078 | 0.00360913424588703 | 0.0284872251282309 | -2.156123534 | Up |
| FNDC1 | 2.44784923076923 | 8.4547975 | 4.04392485785297 | 0.000798317905318756 | 0.010464707242748 | -0.694022932 | Up |
| MYBPC2 | -2.437378205 | 5.316746875 | -5.941495753 | 1.41857430110066e-05 | 0.000809007794229821 | 3.26420190662128 | Down |
| LMOD2 | -2.433627692 | 4.3381975 | -5.207980494 | 6.45245257960639e-05 | 0.00213013190188224 | 1.77347951255349 | Down |
| TFDP1 | 2.43338153846154 | 9.1003325 | 7.70789138893698 | 4.93969327323442e-07 | 8.45314912523827e-05 | 6.55120655535667 | Up |
| CD4 | 2.43052435897436 | 7.154544375 | 3.69060918996376 | 0.00173723953775371 | 0.0173943776924185 | -1.450232688 | Up |
| FABP3 | -2.42624 | 6.19724 | -4.652641405 | 0.000211403269235658 | 0.00440901113880813 | 0.606796160629596 | Down |
| NCKAP1L | 2.41764692307693 | 7.390978125 | 3.08806370583005 | 0.00649329346631404 | 0.0417833215956326 | -2.718128348 | Up |
| GPR34 | 2.4152941025641 | 5.163473125 | 5.60036953715063 | 2.84608284257501e-05 | 0.00123988136097001 | 2.57907685078476 | Up |
| LPXN | 2.41429948717949 | 7.909195 | 5.91168730499394 | 1.50667223381676e-05 | 0.000828958901555419 | 3.20493673228371 | Up |
| ABCA13 | -2.414048205 | 6.1957625 | -2.965917902 | 0.00845175608102411 | 0.0498444025760194 | -2.968555429 | Down |
| ABRA | -2.413007436 | 4.371148125 | -7.035868219 | 1.6859479961614e-06 | 0.00019946390835804 | 5.35405452417602 | Down |
| PIGS | 2.40788512820513 | 8.00111 | 10.4199671859488 | 6.20041763229703e-09 | 7.39998306294207e-06 | 10.7415305136408 | Up |
| PRG4 | -2.407082308 | 4.159395625 | -8.18783943 | 2.13239902683332e-07 | 5.1236932080829e-05 | 7.36595323598309 | Down |
| GBE1 | -2.396880769 | 7.379354375 | -6.824026157 | 2.51423850014738e-06 | 0.000257014722469013 | 4.96295005332047 | Down |
| MT-TS2 | 2.39281897435897 | 8.74297875 | 2.97428313730164 | 0.00830104448499832 | 0.0492546954714501 | -2.951502607 | Up |
| HRC | -2.389451795 | 5.25535375 | -5.513198849 | 3.40826827428762e-05 | 0.0013815044985882 | 2.40165586048296 | Down |
| FBXO32 | -2.388267436 | 7.853809375 | -3.55269353 | 0.00235297139536749 | 0.0212973608977981 | -1.743841382 | Down |
| CD74 | 2.38562615384615 | 11.93044125 | 7.00671855368711 | 1.78061166937357e-06 | 0.000207173305018697 | 5.30062806486082 | Up |
| RN7SL253P | -2.380537436 | 6.751 | -3.175124178 | 0.00537549029911738 | 0.0370992316686005 | -2.537916181 | Down |
| FAIM3 | 2.37813333333333 | 7.62782 | 3.0605274849006 | 0.0068919467067736 | 0.0433785044274297 | -2.774842154 | Up |
| APOBEC3G | 2.37788641025641 | 6.204789375 | 5.37560469364646 | 4.53849078098188e-05 | 0.001662744477714 | 2.11977162209631 | Up |
| TRAF3IP3 | 2.36559564102564 | 6.391673125 | 3.18243218854762 | 0.00529073449450547 | 0.0367653991840904 | -2.522729928 | Up |
| TRIM54 | -2.365580256 | 5.377199375 | -6.177599487 | 8.83849735319054e-06 | 0.000585224027871625 | 3.729385915 | Down |
| ND6 | -2.361189487 | 8.836466875 | -3.043285401 | 0.0071536149691699 | 0.0445681112233207 | -2.81028009 | Down |
| HLA-DOA | 2.36065217948718 | 7.177611563 | 3.81734366468768 | 0.00131427381891775 | 0.0144831110626553 | -1.179436478 | Up |
| ICAM3 | 2.35981307692308 | 7.031818125 | 5.04842135173592 | 9.04562659223761e-05 | 0.00257671390858805 | 1.44110974687531 | Up |
| CTSE | 2.35837128205128 | 8.39945 | 3.38599940060782 | 0.00339227618288799 | 0.0273293401294747 | -2.096540923 | Up |
| MT-TC | 2.35833435897436 | 8.85476 | 4.21819792937188 | 0.000544588167650153 | 0.00815245146947287 | -0.320478291 | Up |
| TAGAP | 2.35380461538462 | 6.43507625 | 3.43849767259866 | 0.0030235455056784 | 0.0253033303773237 | -1.985768736 | Up |
| CAP2 | -2.352450513 | 7.306180625 | -4.555429125 | 0.000260962814819161 | 0.00507701195742085 | 0.400102644915483 | Down |
| CCL4L2 | 2.34477427350427 | 6.632636875 | 3.78694176015322 | 0.00140525720683595 | 0.0150654690523116 | -1.244463553 | Up |
| SNORD14C | 2.34147384615385 | 8.6162375 | 3.48533065592618 | 0.00272824887363862 | 0.023498631373945 | -1.886702247 | Up |
| KLHL38 | -2.33609 | 4.174736875 | -5.017181657 | 9.66718639141795e-05 | 0.00267275341903651 | 1.3757434967089 | Down |
| RNU4-62P | 2.3332241025641 | 7.50651125 | 4.52475012889511 | 0.000278939294623444 | 0.00530280435545563 | 0.334757274786512 | Up |
| GLIPR1 | 2.33118025641026 | 9.096270625 | 5.62677090435473 | 2.69535986990815e-05 | 0.00120505257288657 | 2.63262937100247 | Up |
| DOCK8 | 2.32286461538462 | 7.7570675 | 4.36458682445302 | 0.00039537484550577 | 0.00664549747652211 | -0.007141779 | Up |
| APOC1 | 2.32260666666667 | 6.41964125 | 4.77036942123559 | 0.000163980678152986 | 0.00378538502283441 | 0.856272345971649 | Up |
| FABP4 | -2.316198462 | 6.58411875 | -3.941601698 | 0.000999775616140611 | 0.01204134718783 | -0.913352701 | Down |
| MYOZ2 | -2.296255385 | 3.4450825 | -5.548889052 | 3.16542858402107e-05 | 0.00131041996461419 | 2.47440833325944 | Down |
| CA3 | -2.291605641 | 5.51879375 | -5.421534355 | 4.12368264461587e-05 | 0.00156277514468394 | 2.21411057617903 | Down |
| MYOM3 | -2.288969487 | 4.699215625 | -5.22058484 | 6.2832786223616e-05 | 0.00209805694629487 | 1.79962420332509 | Down |
| CACNA1S | -2.279548205 | 4.49364375 | -5.696874688 | 2.33373712212777e-05 | 0.00111459858822607 | 2.77440745985316 | Down |
| SIRPG | 2.27910461538462 | 5.9043825 | 3.69503075703524 | 0.00172041402941917 | 0.0172760404065802 | -1.440798754 | Up |
| TNFAIP3 | 2.27459564102564 | 8.303235625 | 3.51692945504334 | 0.00254534398868208 | 0.0224119124836468 | -1.819739621 | Up |
| SLAMF8 | 2.27437820512821 | 6.902395625 | 4.3055478646283 | 0.000449812080716645 | 0.00727029831155537 | -0.13343536 | Up |
| CCL28 | 2.27150435897436 | 7.466300625 | 3.86198342816893 | 0.00119125525658487 | 0.013569388700536 | -1.083895371 | Up |
| ARHGDIB | 2.27143923076923 | 9.770894375 | 6.00195483723014 | 1.2558378415022e-05 | 0.000760538796323707 | 3.38404206355276 | Up |
| SLPI | -2.267238974 | 7.232555 | -3.097435006 | 0.00636282546659403 | 0.0412678558700433 | -2.698794785 | Down |
| EGF | -2.266523077 | 4.85117 | -6.646436952 | 3.53141789650918e-06 | 0.000329227027655758 | 4.63003855781215 | Down |
| PDCD1LG2 | 2.26642717948718 | 6.64416875 | 4.40741689028491 | 0.000360100869791991 | 0.00624469566387048 | 0.0843987138952027 | Up |
| CORO1A | 2.25195333333333 | 8.29125875 | 3.23521602080642 | 0.0047162982156798 | 0.0341285428045677 | -2.412791126 | Up |
| BIN2 | 2.24864282051282 | 6.218505625 | 3.06093542122497 | 0.00688587020455073 | 0.0433636792373585 | -2.774003017 | Up |
| AOAH | 2.24726666666667 | 7.2378075 | 3.62099803742657 | 0.00202481624411338 | 0.0191963178918347 | -1.598596138 | Up |
| LAPTM5 | 2.24669307692308 | 10.39941813 | 3.94499188079294 | 0.000992345756306614 | 0.0119713263676181 | -0.906087911 | Up |
| SNORD68 | 2.23565666666667 | 9.373724375 | 3.92341897261096 | 0.00104058785709159 | 0.0123584778878412 | -0.952312713 | Up |
| HLA-DRB1 | 2.23147846153846 | 10.67028125 | 5.73676459985043 | 2.15065599752448e-05 | 0.00105084568835017 | 2.85480482329166 | Up |
| SNORA75 | 2.22779025641026 | 6.19401625 | 4.0374913663468 | 0.000809686504643533 | 0.0105213319129127 | -0.707815559 | Up |
| ADCY2 | -2.226929231 | 5.22373 | -6.351831142 | 6.26340518649926e-06 | 0.000469392876790155 | 4.06773136920849 | Down |
| ARHGAP15 | 2.22236692307692 | 6.508903125 | 3.11244197778012 | 0.00615921250265164 | 0.0404373988167047 | -2.66780104 | Up |
| GPR65 | 2.2187358974359 | 6.49020625 | 3.64327457722019 | 0.00192797139278004 | 0.018560606877953 | -1.551152161 | Up |
| IGKV5-2 | 2.21789717948718 | 6.682458125 | 3.36771903946694 | 0.00353083109245607 | 0.0281155783238335 | -2.135038498 | Up |
| KCNIP3 | 2.21765512820513 | 8.154208125 | 3.54375894815748 | 0.00239963268794261 | 0.0215606164448259 | -1.762812648 | Up |
| EPC1 | 2.21693628205128 | 10.06574406 | 6.37481631778326 | 5.98702515928182e-06 | 0.000457506870122562 | 4.11204822038566 | Up |
| MYLPF | -2.216275385 | 5.42181625 | -9.657090887 | 1.94802174893299e-08 | 1.43454688099198e-05 | 9.66071383374872 | Down |
| WIPF1 | 2.2104558974359 | 9.05353875 | 4.53478015487286 | 0.000272927823557356 | 0.00522689300217855 | 0.356126647629138 | Up |
| RARRES1 | -2.210057179 | 6.680791875 | -4.881875024 | 0.000129061883998224 | 0.00321967506889744 | 1.09159930337424 | Down |
| C10orf10 | -2.203765641 | 7.94612375 | -6.15331683 | 9.27605772550946e-06 | 0.000605594054365403 | 3.68189471882781 | Down |
| HSPB7 | -2.198505385 | 5.497874375 | -3.89454522 | 0.00110885940085322 | 0.0129011086139331 | -1.014166199 | Down |
| LY96 | 2.19815076923077 | 5.2096975 | 3.10618119360552 | 0.00624337225293844 | 0.040818140384718 | -2.680736339 | Up |
| SNORA9 | 2.18889384615385 | 7.11996625 | 3.41621420798056 | 0.00317494861014015 | 0.0261663816324386 | -2.032824712 | Up |
| CD86 | 2.18889307692308 | 5.942865625 | 3.61965197513973 | 0.00203082086793574 | 0.0192326897869758 | -1.60146184 | Up |
| APOBEC3B | 2.17865461538462 | 6.584306875 | 7.05526224283979 | 1.62587470071206e-06 | 0.000194329546920493 | 5.38953149474245 | Up |
| BCL11A | 2.17609897435897 | 6.64858375 | 4.30022062395383 | 0.000455082731512555 | 0.00732500913215685 | -0.144836741 | Up |
| CYR61 | 2.17311589743589 | 9.41725 | 4.30065708315947 | 0.000454648569187275 | 0.00732307823223761 | -0.143902597 | Up |
| H19 | -2.171623077 | 8.21645625 | -3.220170874 | 0.00487348320035153 | 0.0348210524066809 | -2.444171542 | Down |
| HIST1H3B | 2.17147923076923 | 6.929016875 | 2.97519200736038 | 0.00828482794289713 | 0.0491709918169349 | -2.949648936 | Up |
| LOC101928841 | -2.167075897 | 5.1642075 | -4.857156817 | 0.000136084270683255 | 0.00331769466193998 | 1.03951939832375 | Down |
| FCGR2A | 2.16684230769231 | 7.263569375 | 4.00043101758153 | 0.000878420195336384 | 0.0111389224661072 | -0.78726436 | Up |
| RN7SL473P | 2.1663 | 6.24541875 | 3.4723558220483 | 0.0028070720259657 | 0.0239601905341347 | -1.914170244 | Up |
| MYL3 | -2.165907692 | 4.59647 | -4.860773737 | 0.000135032842087315 | 0.00330159821938565 | 1.04714321807903 | Down |
| EMP3 | 2.16561820512821 | 8.096708125 | 7.98731322651895 | 3.01795350510437e-07 | 6.17012652135681e-05 | 7.02957976936753 | Up |
| TESPA1 | 2.15722358974359 | 5.6770775 | 3.56422810369715 | 0.00229406202337293 | 0.0209266941599816 | -1.719339563 | Up |
| USP9Y | -2.153571026 | 3.781036875 | -3.163670211 | 0.00551101308648256 | 0.0376451295447389 | -2.561700139 | Down |
| CHST11 | 2.15035743589744 | 8.57745875 | 4.7483206415677 | 0.00017195481833372 | 0.00387619559855965 | 0.809624731310645 | Up |
| CD2 | 2.14955974358974 | 7.002990625 | 3.5587518234556 | 0.00232184550936055 | 0.021097564634178 | -1.730973683 | Up |
| PLIN2 | -2.149481026 | 6.96052 | -6.553231536 | 4.22795247191031e-06 | 0.000383427580789158 | 4.45348574618755 | Down |
| HLA-DRB3 | 2.14923615384615 | 10.70575438 | 5.19641148807941 | 6.61183863848269e-05 | 0.00215351948247102 | 1.74946771566405 | Up |
| LY9 | 2.14877025641026 | 6.4342825 | 3.54549470657428 | 0.00239049624463309 | 0.021536001800087 | -1.75912755 | Up |
| EYA4 | -2.145970769 | 4.88544875 | -3.824435725 | 0.00129391175111984 | 0.0143264613697625 | -1.164262099 | Down |
| CD226 | 2.14405384615385 | 5.89871375 | 3.35504921257733 | 0.00363012448990784 | 0.0286222298668072 | -2.161696889 | Up |
| SNORD5 | 2.14208538461539 | 8.905264375 | 3.95997785174442 | 0.00096016124174916 | 0.0117105788732122 | -0.873972354 | Up |
| NDUFB6 | 2.13806974358974 | 6.059875 | 8.11776207385757 | 2.40617542093218e-07 | 5.60807305356662e-05 | 7.24905562812454 | Up |
| BANK1 | 2.13738512820513 | 7.23351875 | 4.4104539716751 | 0.000357724092981764 | 0.00621735677488887 | 0.0908870403287816 | Up |
| SOD2 | -2.134914359 | 8.85876875 | -4.585413816 | 0.000244529876110411 | 0.00483159732526086 | 0.463917549151828 | Down |
| CLDN1 | 2.13472358974359 | 8.50221625 | 3.8026306180305 | 0.0013575449689494 | 0.0147088762726058 | -1.210910965 | Up |
| LAMA2 | -2.133069231 | 6.49998125 | -3.992790203 | 0.000893304946966111 | 0.01124554420982 | -0.803643217 | Down |
| SLC15A2 | 2.12379666666667 | 6.575088125 | 4.99378714896102 | 0.000101611300026637 | 0.00276020346121308 | 1.32673273531705 | Up |
| KDM5D | -2.119163846 | 4.185079375 | -3.499800977 | 0.00264292608454753 | 0.022976008300093 | -1.856049071 | Down |
| GYG1 | -2.116800769 | 8.227059375 | -5.625074983 | 2.70479020181137e-05 | 0.00120505257288657 | 2.62919195047014 | Down |
| KLHL40 | -2.110234103 | 5.436148125 | -5.199441895 | 6.56970271150997e-05 | 0.00215351948247102 | 1.75575876282576 | Down |
| ITGAX | 2.10946307692308 | 6.86687875 | 3.89918639620287 | 0.00109758981028861 | 0.0128099778209298 | -1.004225141 | Up |
| IDI2 | -2.108175128 | 3.560104375 | -5.515761196 | 3.39021202478106e-05 | 0.00137657964567199 | 2.40688414857505 | Down |
| AKR1C2 | -2.106346154 | 6.02497375 | -4.142880199 | 0.000642382465982422 | 0.00909223980855013 | -0.481882344 | Down |
| CD38 | 2.10509641025641 | 7.2658875 | 3.06504374586281 | 0.00682496430319716 | 0.0431772246790555 | -2.765550297 | Up |
| CD68 | 2.10447 | 9.743891875 | 4.89742111958313 | 0.000124835827262161 | 0.00315569265292753 | 1.12432780417801 | Up |
| MYADM | 2.10347512820513 | 9.658836875 | 4.75823474407233 | 0.000168321513714066 | 0.0038472968866414 | 0.830604046843336 | Up |
| HIST1H2BF | 2.10196307692308 | 6.602025 | 3.22345701408796 | 0.00483871787302868 | 0.0347003069128245 | -2.437320422 | Up |
| COX8A | 2.10159461538462 | 9.401795625 | 5.64028958186027 | 2.62138750871286e-05 | 0.00120269052491281 | 2.66001729699198 | Up |
| MZB1 | 2.09854282051282 | 7.865769375 | 3.12611237847394 | 0.0059792855096914 | 0.0396695722671157 | -2.63953247 | Up |
| TNFSF13B | 2.09429256410256 | 6.486959375 | 4.03802550771105 | 0.000808736456715178 | 0.0105209582213189 | -0.70667043 | Up |
| FIGF | -2.094163077 | 3.5352225 | -4.308802724 | 0.000446622227884537 | 0.00724890269171651 | -0.126469722 | Down |
| PTGIS | -2.092467692 | 7.06452 | -4.394877703 | 0.000370084509236841 | 0.00636572668397273 | 0.0576063336497299 | Down |
| KIF5B | 2.09217538461539 | 9.5781225 | 13.2524746283739 | 1.44238324440703e-10 | 7.30410355909701e-07 | 14.1888410002097 | Up |
| LHFP | 2.09110564102564 | 9.19635 | 4.96748012218089 | 0.000107474876233389 | 0.00284630741619389 | 1.27156026409416 | Up |
| APOBEC2 | -2.090980513 | 4.716535 | -4.513639347 | 0.00028575565466499 | 0.00539069357925514 | 0.311078992735858 | Down |
| PRELP | -2.09071359 | 7.643991875 | -4.698675947 | 0.000191387331456148 | 0.0041571896870908 | 0.704463638695578 | Down |
| SYNPO2L | -2.090669231 | 4.40071125 | -5.247052761 | 5.94266888388005e-05 | 0.00201609583226481 | 1.8544708242805 | Down |
| PARP3 | 2.09031256410257 | 7.615115625 | 9.93777791573389 | 1.26908297677262e-08 | 1.23243820581831e-05 | 10.066737650595 | Up |
| JPH1 | -2.081428718 | 5.8641625 | -4.428166795 | 0.000344175603535136 | 0.00605868639848446 | 0.128720327294972 | Down |
| IL10RA | 2.0712658974359 | 7.814846875 | 3.76669807075606 | 0.00146930734473301 | 0.0155166045689589 | -1.287741911 | Up |
| PROSER1 | 2.06836666666667 | 8.08926125 | 7.56597375244568 | 6.36939149718137e-07 | 0.000100305005151896 | 6.3038997411757 | Up |
| MIR186 | 2.06818128205128 | 4.983360625 | 3.88067504424347 | 0.00114323480022335 | 0.013197312277764 | -1.043871876 | Up |
| AMY2A | -2.064755321 | 7.783312969 | -6.539331042 | 4.34343922897952e-06 | 0.000387864130688987 | 4.42704769996775 | Down |
| UCP2 | 2.05989769230769 | 9.405756875 | 5.4827066640496 | 3.63088609046493e-05 | 0.00143675827012676 | 2.33937871037813 | Up |
| LGALS9 | 2.05636051282051 | 5.51958625 | 5.34407936604837 | 4.84780170252453e-05 | 0.00173294040307882 | 2.05488028357891 | Up |
| ADH1C | -2.055054872 | 5.44809125 | -3.256479793 | 0.0045026056653832 | 0.0329695979400208 | -2.368382311 | Down |
| ATF3 | 2.05123564102564 | 6.848935625 | 2.9868115076385 | 0.00808019879022887 | 0.0484500111149638 | -2.92593504 | Up |
| PYHIN1 | 2.05095538461538 | 5.97658125 | 3.54792294852613 | 0.00237777274244585 | 0.0214468844071925 | -1.753971847 | Up |
| LBP | -2.05089359 | 4.830805625 | -4.099695029 | 0.00070626013466899 | 0.00959813700217502 | -0.574457606 | Down |
| SRPX2 | -2.048087436 | 5.717575625 | -5.690814792 | 2.36292337344991e-05 | 0.00112393173602035 | 2.76217622991314 | Down |
| RBFOX1 | -2.046143077 | 3.88245875 | -4.350788786 | 0.000407468569683295 | 0.00679804577924735 | -0.036647191 | Down |
| TMEM254 | 2.04558307692308 | 8.38285625 | 5.26835782126027 | 5.68228350748565e-05 | 0.00195047101191411 | 1.8985646002737 | Up |
| ABLIM2 | -2.041084359 | 6.261135625 | -3.637618125 | 0.00195211634676394 | 0.0187388697257113 | -1.563202339 | Down |
| SNORD78 | 2.04106538461538 | 5.721235625 | 4.54184651161123 | 0.000268771767855468 | 0.00517280230669479 | 0.371178500365067 | Up |
| CKS2 | 2.03613384615385 | 7.03585875 | 3.2751144175995 | 0.00432318128393136 | 0.0319906381542191 | -2.329410196 | Up |
| SNORA49 | 2.03562717948718 | 8.52132375 | 3.3861285963212 | 0.00339131631749073 | 0.0273293401294747 | -2.096268702 | Up |
| LILRB4 | 2.03346871794872 | 6.76682 | 4.13234366550249 | 0.000657409442006287 | 0.00918599632184684 | -0.504467905 | Up |
| P4HA1 | -2.033270513 | 7.449314375 | -8.440671456 | 1.38632601496155e-07 | 4.42559181951486e-05 | 7.78191622473918 | Down |
| FAM102A | 2.03016205128205 | 8.88924 | 8.82105683157299 | 7.36327702674238e-08 | 2.95889478728077e-05 | 8.39089169161607 | Up |
| PPP1R3C | -2.026938462 | 5.2537025 | -4.234533521 | 0.000525444043217567 | 0.00797299760108843 | -0.285484717 | Down |
| TMOD4 | -2.023091282 | 4.511985 | -5.59608184 | 2.87136762364272e-05 | 0.00124405233514817 | 2.57037159100177 | Down |
| SNORD12C | 2.02190153846154 | 5.447905 | 4.24111696193642 | 0.000517922233533974 | 0.00789484205165227 | -0.271383518 | Up |
| KLF6 | 2.02183435897436 | 8.53184375 | 4.76463511544323 | 0.000166017562060838 | 0.00382348944560469 | 0.844144034499399 | Up |
| ST20 | 2.01831871794872 | 7.721440625 | 9.17269702297029 | 4.16722708660283e-08 | 1.98215432056025e-05 | 8.93625929716895 | Up |
| PLN | -2.018095897 | 5.97549375 | -3.306394854 | 0.00403768436643049 | 0.0305143675513604 | -2.263881212 | Down |
| EAF2 | 2.01738307692308 | 6.99599375 | 2.99437045156541 | 0.00794972509973918 | 0.0479266018881586 | -2.910492864 | Up |
| UNC45B | -2.015171538 | 4.303423125 | -5.005021184 | 9.92079670516755e-05 | 0.00271708588492762 | 1.35027402015004 | Down |
| LPL | -2.011728205 | 6.3245075 | -3.682004179 | 0.00177045631043709 | 0.0175890985623859 | -1.468589212 | Down |
| TAGLN | -2.011498718 | 7.918380625 | -4.876685572 | 0.000130504870786762 | 0.00323238791012441 | 1.0806696406048 | Down |
| ADH1A | -2.011152308 | 5.15763875 | -4.005232417 | 0.000869194595163679 | 0.0110627565307912 | -0.776971807 | Down |
| STX11 | 2.00728384615385 | 8.131088125 | 5.74849971677299 | 2.09966232786524e-05 | 0.00104015008693194 | 2.87841819628574 | Up |
| KIF1C | -2.004448205 | 8.4957825 | -6.206269975 | 8.34920902490061e-06 | 0.000560792549692676 | 3.78535349916645 | Down |
| KLF7 | 2.00373666666667 | 8.890569375 | 5.83654478972052 | 1.75469749026032e-05 | 0.000918602091574029 | 3.05501705677475 | Up |
| GPR132 | 2.00284974358974 | 6.44862875 | 4.13382984693781 | 0.000655268601843248 | 0.00916994488581183 | -0.501282138 | Up |
| HLA-DMB | 1.99736346153846 | 9.975782813 | 9.71797221450944 | 1.77380424047286e-08 | 1.43454688099198e-05 | 9.74962505275014 | Up |
| BCL2A1 | 1.99632076923077 | 5.389120625 | 3.07636247056546 | 0.00665986952807147 | 0.0424924096981158 | -2.7422458 | Up |
| SNORA8 | 1.99586692307693 | 8.433471875 | 4.32037175204135 | 0.000435468328152779 | 0.007107465213065 | -0.101713829 | Up |
| RAB30 | 1.99104564102564 | 7.47917125 | 4.86218231278865 | 0.000134625619143065 | 0.00329718319710326 | 1.05011195231803 | Up |
| SAMD9 | 1.98925358974359 | 6.942931875 | 3.23887183501298 | 0.00467886227615684 | 0.0339297582670776 | -2.405160839 | Up |
| RPUSD4 | -1.989100769 | 6.597305625 | -8.34702491 | 1.6244964132272e-07 | 4.6743380127267e-05 | 7.62890036387545 | Down |
| MALL | 1.98770666666667 | 8.476145 | 4.87918598387775 | 0.000129807557953874 | 0.0032309980861779 | 1.08593611657393 | Up |
| AHSA1 | -1.986380256 | 7.906469375 | -6.839126402 | 2.44313264066391e-06 | 0.000253075966470906 | 4.99104543910203 | Down |
| COX4I1 | 1.98621564102564 | 7.214326875 | 9.22544718006249 | 3.83099031246151e-08 | 1.89976364282001e-05 | 9.01664218322295 | Up |
| SNAP29 | 1.98574102564103 | 7.83967125 | 7.40372058653977 | 8.54564722691268e-07 | 0.000123710186284257 | 6.01755041431857 | Up |
| IGLV9-49 | 1.98339230769231 | 8.22701625 | 3.90298119614129 | 0.00108846076628258 | 0.0127545274407984 | -0.996096573 | Up |
| SNORA52 | 1.98290769230769 | 7.6008925 | 3.83481569442895 | 0.00126467765498534 | 0.0140865457467619 | -1.14204959 | Up |
| C16orf89 | 1.97341923076923 | 9.781323125 | 3.17406821875214 | 0.00538784646815102 | 0.037141241535994 | -2.540109771 | Up |
| HFE2 | -1.973372051 | 4.509371875 | -5.058998097 | 8.84457649894347e-05 | 0.00254494499334414 | 1.46321961235494 | Down |
| GPT2 | -1.960824359 | 5.438106875 | -11.49939846 | 1.35867072241265e-09 | 3.16665385272717e-06 | 12.1539810880303 | Down |
| ALPK3 | -1.958758462 | 5.78214875 | -5.37838951 | 4.51216024257982e-05 | 0.0016600762020223 | 2.12549845665962 | Down |
| RNU5F-1 | 1.95868846153846 | 3.345934375 | 3.06170808383492 | 0.00687437515958688 | 0.0433334157783315 | -2.772413541 | Up |
| OTUD7B | -1.957858974 | 6.27206625 | -6.293668002 | 7.02334375969568e-06 | 0.00050059043733097 | 3.95525593688003 | Down |
| BTN3A1 | 1.95508282051282 | 8.133558125 | 3.90459088414346 | 0.00108461142210521 | 0.0127158140920554 | -0.992648474 | Up |
| C1QB | 1.95183102564103 | 8.937599375 | 5.49387711435369 | 3.54764730992611e-05 | 0.00141636026574222 | 2.36220601678031 | Up |
| DUSP27 | -1.950270256 | 4.25222875 | -4.588735034 | 0.000242775609645291 | 0.00481154007993436 | 0.47098268084338 | Down |
| RHNO1 | 1.94777025641026 | 7.86492 | 10.9122876269619 | 3.05905015804026e-09 | 4.75315213556295e-06 | 11.4020342998412 | Up |
| RN7SL834P | 1.94436846153846 | 5.915429375 | 5.47157362763491 | 3.71584454420321e-05 | 0.00145554939145789 | 2.31661319367458 | Up |
| MIS18BP1 | 1.94026358974359 | 6.2432575 | 4.49966773731737 | 0.000294567734470629 | 0.00549040756306294 | 0.281294752382834 | Up |
| MYLK2 | -1.936201795 | 4.975729375 | -4.398299924 | 0.000367332247160554 | 0.00632772556139766 | 0.0649192059841956 | Down |
| FAM72B | 1.93272134615385 | 5.188013594 | 3.61014732598286 | 0.00207372732916406 | 0.0195273321220422 | -1.621693093 | Up |
| HIST1H4E | 1.93210692307692 | 8.542396875 | 6.41720138615999 | 5.50998562471012e-06 | 0.000435326220186843 | 4.19357281920873 | Up |
| ATXN7L1 | 1.92984452991453 | 7.64940479166667 | 8.94449392179571 | 6.01941469489239e-08 | 2.59804626470105e-05 | 8.584233969 | Up |
| GATSL2 | -1.928986667 | 6.725255 | -5.188863548 | 6.71799613831242e-05 | 0.00216774345278876 | 1.7337942253716 | Down |
| PRUNE2 | -1.925340769 | 4.512020625 | -3.289173333 | 0.00419248741131777 | 0.0313576061724514 | -2.299975062 | Down |
| JMJD8 | 1.92387435897436 | 8.63664125 | 5.34189470618029 | 4.87002231857326e-05 | 0.00173821761376703 | 2.05037926958794 | Up |
| SLCO2B1 | 1.9186041025641 | 7.9614625 | 4.88593092908642 | 0.000127945438719782 | 0.00321373502643554 | 1.10013999165346 | Up |
| BTG2 | 1.91472948717949 | 10.26800438 | 6.52324990091799 | 4.48113070322107e-06 | 0.000391886727860917 | 4.39642753429011 | Up |
| BTN3A2 | 1.91357487179487 | 7.58760625 | 3.24773078298741 | 0.00458935237965266 | 0.0334171159110007 | -2.386662479 | Up |
| STAT4 | 1.91024666666667 | 6.27135875 | 3.35861706542279 | 0.00360188779243363 | 0.028476661729393 | -2.154191815 | Up |
| NOX4 | -1.909524615 | 5.25892125 | -4.7114394 | 0.000186187161482337 | 0.00408366702505045 | 0.731516952732438 | Down |
| RNA5SP82 | 1.90932 | 5.2035125 | 4.97635221348737 | 0.000105459682433268 | 0.00281229841930455 | 1.2901743146105 | Up |
| DNAJC15 | 1.90906666666667 | 8.67751 | 8.28132684882748 | 1.81681556090256e-07 | 4.86718623884552e-05 | 7.52081358408011 | Up |
| WDR76 | 1.90367333333333 | 5.64994125 | 3.92215215899389 | 0.00104349282569528 | 0.0123769400959185 | -0.955026867 | Up |
| SCD | 1.90150846153846 | 6.049785625 | 5.18684086152648 | 6.74673969137483e-05 | 0.00216891395843963 | 1.72959306003794 | Up |
| UBE2MP1 | -1.901402051 | 5.6184475 | -3.872669543 | 0.00116355949609514 | 0.0133460045154967 | -1.061014893 | Down |
| SCARNA12 | 1.90057538461539 | 9.8069175 | 4.54913702508826 | 0.000264551219696727 | 0.00512174569547551 | 0.386704919608676 | Up |
| RNA5-8SP6 | -1.899874103 | 4.408595625 | -4.860401324 | 0.00013514071743656 | 0.00330159821938565 | 1.04635828911892 | Down |
| TFEC | 1.89845384615385 | 5.94305375 | 2.99349265902842 | 0.00796477079338708 | 0.0479676777471506 | -2.912286724 | Up |
| METTL5 | -1.890991538 | 7.860129375 | -6.045538906 | 1.15057287854528e-05 | 0.000722814072244064 | 3.47012764764119 | Down |
| SLA | 1.88846307692308 | 7.27837625 | 3.4835305923071 | 0.00273905193359702 | 0.0235655531252661 | -1.890514003 | Up |
| IGKV2D-18 | 1.88771128205128 | 4.89875375 | 5.61977470461315 | 2.73448239178642e-05 | 0.00120505257288657 | 2.6184466564911 | Up |
| RNU6-447P | 1.88757384615385 | 6.04083375 | 3.75617520280215 | 0.0015037455208028 | 0.0157376725879439 | -1.310231193 | Up |
| ADM | -1.884714103 | 6.787703125 | -5.841559355 | 1.73690370441224e-05 | 0.000917915382473097 | 3.0650448905275 | Down |
| TMEM179B | 1.88067897435897 | 9.607565 | 5.47790114566645 | 3.66731039292515e-05 | 0.0014438176237822 | 2.32955388392708 | Up |
| MAOA | -1.878098718 | 9.088178125 | -4.071250498 | 0.000751793453591542 | 0.010058582102674 | -0.635439246 | Down |
| IFI44L | 1.8748458974359 | 8.316805625 | 4.14019713880448 | 0.000646175806443365 | 0.00911096159756534 | -0.487633505 | Up |
| PPDPF | 1.87315717948718 | 9.598896875 | 5.31067486767077 | 5.19923442772691e-05 | 0.00183025996405533 | 1.98599957056725 | Up |
| RPL3L | -1.873030513 | 5.869109375 | -6.164713224 | 9.067978304855e-06 | 0.000597026469918801 | 3.70419355440538 | Down |
| ADCK3 | -1.872651795 | 6.89678375 | -5.281112484 | 5.53202664528325e-05 | 0.00190732167191741 | 1.92493869078263 | Down |
| FKBP3 | -1.872145385 | 5.930911875 | -9.797227393 | 1.57110980285189e-08 | 1.43454688099198e-05 | 9.86466585029632 | Down |
| TIMP4 | -1.869635128 | 5.949058125 | -5.917150715 | 1.49011266121338e-05 | 0.00082887961324344 | 3.21580792647152 | Down |
| TMEM159 | -1.869527692 | 6.71747875 | -9.756402538 | 1.67230083675293e-08 | 1.43454688099198e-05 | 9.80550668951467 | Down |
| GZMA | 1.86565564102564 | 6.347181875 | 3.27804102269387 | 0.00429564879554298 | 0.031874780795199 | -2.323285049 | Up |
| C10orf71 | -1.865568974 | 4.351841875 | -4.229513103 | 0.000531254129703208 | 0.00801661885529587 | -0.296238689 | Down |
| ATP5EP2 | 1.86537948717949 | 8.2101375 | 10.4589923889306 | 5.85745802339499e-09 | 7.39998306294207e-06 | 10.7949192502083 | Up |
| AOX1 | -1.861634103 | 5.926185625 | -3.988878726 | 0.000901022565862555 | 0.011290394055139 | -0.812027639 | Down |
| CASP8 | 1.86100435897436 | 7.027559375 | 4.18436984029276 | 0.000586502053974995 | 0.00856491439348071 | -0.392960153 | Up |
| STIL | 1.8582241025641 | 5.26163375 | 4.22393188331591 | 0.000537789437999499 | 0.0080814045334973 | -0.308194563 | Up |
| SCARNA5 | -1.855558205 | 8.347995625 | -3.42282672 | 0.00312925445553272 | 0.0259457607951267 | -2.018866717 | Down |
| SERPINB9 | 1.85357333333333 | 7.782585 | 4.14104108372743 | 0.000644980198970612 | 0.00911063848327761 | -0.485824494 | Up |
| C1QC | 1.84895 | 8.727291875 | 4.70408810415907 | 0.000189164450009536 | 0.00412814216888788 | 0.715936600736304 | Up |
| RASD1 | -1.848944615 | 7.9739025 | -4.806269419 | 0.000151794725474578 | 0.00359832645457619 | 0.932145325164417 | Down |
| MYOG | -1.8469 | 6.01535375 | -3.490951483 | 0.00269478664843491 | 0.0232775354470741 | -1.874797754 | Down |
| FBXO40 | -1.842614872 | 3.54113875 | -4.715197844 | 0.000184683463985997 | 0.00407615293098639 | 0.739481131214156 | Down |
| NREP | 1.84117794871795 | 7.57890375 | 9.34104667752635 | 3.18961060910105e-08 | 1.85850636165796e-05 | 9.19151236279015 | Up |
| WARS | 1.83579051282051 | 10.02858313 | 3.95577189604693 | 0.000969086841464181 | 0.0117706535195421 | -0.882986248 | Up |
| THY1 | 1.83437487179487 | 7.39806625 | 6.22550869438348 | 8.03665613844359e-06 | 0.000550912778290308 | 3.82284529425686 | Up |
| ACER3 | 1.8334217948718 | 6.724201875 | 9.96982736224823 | 1.20914771013101e-08 | 1.22528720347928e-05 | 10.1124708444999 | Up |
| FXYD1 | -1.833383846 | 6.605075625 | -4.942749083 | 0.000113302536264876 | 0.00294682069187691 | 1.2196360929186 | Down |
| HLA-DQB2 | 1.8321691025641 | 8.062464063 | 4.0949589042645 | 0.000713644205297998 | 0.00969283536881145 | -0.584611096 | Up |
| IFI6 | 1.83148692307692 | 10.04167313 | 3.1193276804452 | 0.00606793249214693 | 0.0400432774614693 | -2.65356648 | Up |
| MYO18B | -1.830732308 | 4.81178 | -4.120272829 | 0.000675060702243506 | 0.00936458170700577 | -0.530343562 | Down |
| KLF15 | -1.830239744 | 6.147576875 | -4.810738829 | 0.000150343663775559 | 0.00358588149594014 | 0.941584211741711 | Down |
| THEMIS2 | 1.82912282051282 | 7.024335625 | 4.69687701343582 | 0.000192132064192581 | 0.0041666657912392 | 0.70064971674172 | Up |
| TMEM106A | 1.82759384615384 | 7.00131 | 9.15978764484476 | 4.2541242319024e-08 | 1.98301746945899e-05 | 8.9165311945796 | Up |
| TLR3 | 1.82435102564103 | 7.974331875 | 5.7561373389406 | 2.06714455024066e-05 | 0.00102726946764305 | 2.89377714244137 | Up |
| CLIP4 | -1.821835897 | 8.328145 | -8.305322424 | 1.74395571503348e-07 | 4.8046178321834e-05 | 7.56036195909349 | Down |
| USP13 | -1.819014872 | 7.61062375 | -4.025814286 | 0.000830738768181242 | 0.0107387845091515 | -0.732849393 | Down |
| SNORD57 | 1.81847538461538 | 10.38211125 | 3.32389786920217 | 0.00388612199454631 | 0.0297940280680562 | -2.227156547 | Up |
| GFRA2 | 1.81766 | 7.71584875 | 3.13957396368994 | 0.00580713371066926 | 0.0389263345972299 | -2.611663508 | Up |
| KYNU | 1.81676205128205 | 5.8932925 | 3.13850056295452 | 0.00582068095711103 | 0.0389723099877583 | -2.613886883 | Up |
| BEST3 | -1.814954872 | 3.0328925 | -3.609357595 | 0.00207733271121797 | 0.0195463841341773 | -1.623373793 | Down |
| C3AR1 | 1.81363358974359 | 7.057630625 | 4.17298087018943 | 0.000601334091458843 | 0.00869435091168192 | -0.417367094 | Up |
| ABHD14A | 1.81141641025641 | 8.5831725 | 3.4732853103376 | 0.00280135104196952 | 0.0239336835539529 | -1.912203049 | Up |
| SNORA71C | 1.81080435897436 | 7.630621875 | 3.51222274788762 | 0.00257179659532228 | 0.0225680961020996 | -1.829719726 | Up |
| MBNL3 | 1.81080256410256 | 7.85683375 | 7.47180722939543 | 7.55081248745987e-07 | 0.000113353142323868 | 6.13818108297758 | Up |
| TMEM38A | -1.810221026 | 6.21799875 | -5.066425364 | 8.7061311893843e-05 | 0.0025150203372353 | 1.47873931244446 | Down |
| CEP170 | 1.80835333333333 | 7.72726375 | 5.73009143873213 | 2.18022084014935e-05 | 0.00105863348169502 | 2.8413692697829 | Up |
| SNORD52 | 1.80766025641026 | 6.336600625 | 4.10065420030589 | 0.000704774092970568 | 0.00958352962944284 | -0.57240131 | Up |
| GGTA1P | 1.80432461538461 | 6.06335375 | 4.35904007060029 | 0.000400192172442632 | 0.00669582122262772 | -0.019001998 | Up |
| UGP2 | -1.804154103 | 8.310768125 | -5.913793507 | 1.50026597194084e-05 | 0.000828958901555419 | 3.20912816076648 | Down |
| NFYB | -1.802985641 | 6.4837775 | -8.104640373 | 2.4613904056854e-07 | 5.67996298864452e-05 | 7.22708908893969 | Down |
| CTSW | 1.79786128205128 | 7.156445625 | 4.08574630148078 | 0.000728231035978842 | 0.00985077234797381 | -0.604361695 | Up |
| CTGF | 1.79732948717949 | 10.11909688 | 3.53881550284815 | 0.00242584374007854 | 0.021704084472173 | -1.773306407 | Up |
| TLE3 | 1.79458128205128 | 7.876840625 | 7.84991450386712 | 3.84042461501385e-07 | 7.27713630098601e-05 | 6.79576376058013 | Up |
| SNORD32B | 1.79457717948718 | 5.470910625 | 3.76320240521534 | 0.00148065928370031 | 0.0155781923983237 | -1.295213349 | Up |
| HCST | 1.7903417948718 | 6.826289375 | 4.29650321478592 | 0.00045879761496674 | 0.00736953550105431 | -0.152793257 | Up |
| UBC | 1.78938205128205 | 12.36240625 | 8.82455793001492 | 7.3211248469529e-08 | 2.95889478728077e-05 | 8.39640412673033 | Up |
| LOC100287497 | 1.78766576923077 | 6.223658438 | 4.50596921363092 | 0.000290559658524854 | 0.00544084979782067 | 0.294729298995816 | Up |
| POP4 | 1.78726820512821 | 7.19894875 | 9.55039342809573 | 2.29793473333763e-08 | 1.57523425970294e-05 | 9.50375148960583 | Up |
| ATP6V0E2 | 1.78465256410257 | 8.291876875 | 3.48284107729456 | 0.00274320127056684 | 0.0235925431782662 | -1.891974015 | Up |
| PLIN4 | -1.784244359 | 5.191488125 | -5.682206322 | 2.40503196406699e-05 | 0.00113469797543541 | 2.74479303346359 | Down |
| RN7SL144P | -1.783458205 | 6.600016875 | -3.596078436 | 0.00213889894780414 | 0.0199724830835221 | -1.651627502 | Down |
| SYVN1 | 1.78241974358974 | 8.715379375 | 9.26569045323413 | 3.59362469570153e-08 | 1.89976364282001e-05 | 9.07771890935086 | Up |
| LDB3 | -1.781418462 | 4.9876875 | -4.148246783 | 0.000634862361328881 | 0.00902240064359282 | -0.470379255 | Down |
| CFL2 | -1.779156923 | 7.961245 | -4.96379328 | 0.000108323834717962 | 0.0028567547730087 | 1.26382301191924 | Down |
| FHL5 | -1.778769487 | 5.371553125 | -3.936155599 | 0.0010118282678777 | 0.012143502286007 | -0.925022671 | Down |
| ALYREF | 1.7781117948718 | 8.3145075 | 5.7263983380741 | 2.19676243958761e-05 | 0.00106444786235901 | 2.83393124820137 | Up |
| SLC31A1 | 1.77804717948718 | 8.61809 | 4.71639583088053 | 0.000184206771339485 | 0.00407324519519849 | 0.742019465215504 | Up |
| MBOAT1 | 1.77755128205128 | 7.34540375 | 8.00540766540106 | 2.92420879530856e-07 | 6.13339218741287e-05 | 7.06016894041884 | Up |
| SLC2A4 | -1.77632359 | 5.74629375 | -4.686545527 | 0.000196466650572152 | 0.00419326760520618 | 0.67874157255069 | Down |
| VDAC1P4 | -1.771865641 | 6.2538325 | -7.130100156 | 1.4141363747979e-06 | 0.000178158251283322 | 5.52591315422901 | Down |
| SCD5 | 1.77163692307692 | 7.157575 | 5.12428127558617 | 7.70083944213444e-05 | 0.00235723107019211 | 1.59944812213431 | Up |
| XAF1 | 1.77020692307692 | 8.170633125 | 4.70841842613218 | 0.000187404843003365 | 0.00410126260645956 | 0.725114754975874 | Up |
| ITM2C | 1.76895512820513 | 9.341769375 | 5.9514716237598 | 1.39029248624116e-05 | 0.000806058382508027 | 3.28400950627149 | Up |
| EBAG9 | 1.76712615384615 | 7.38947 | 7.65974909125354 | 5.38294212047384e-07 | 8.96144514299171e-05 | 6.46764248428491 | Up |
| C11orf96 | -1.766443846 | 6.665864375 | -6.929088647 | 2.06061703013989e-06 | 0.00022930264195293 | 5.15773808281856 | Down |
| SLC7A7 | 1.76591871794872 | 6.987895625 | 4.36158215872469 | 0.000397977047911509 | 0.00667311364729928 | -0.013566296 | Up |
| CCL4 | 1.76342948717949 | 4.888593125 | 3.20895729919285 | 0.00499397181048898 | 0.0353997874048257 | -2.467537635 | Up |
| RNU6-925P | 1.76085769230769 | 6.353886875 | 4.0178504276053 | 0.000845411519248054 | 0.0108790564370451 | -0.74992226 | Up |
| TAPBPL | 1.76063128205128 | 8.43510625 | 5.06133392266824 | 8.80079523488655e-05 | 0.00253547755920273 | 1.46810102761114 | Up |
| PTPN6 | 1.75997794871795 | 7.94948875 | 3.43689162646547 | 0.00303421458105954 | 0.0253652938453209 | -1.989162014 | Up |
| DMD | -1.759503846 | 5.284293125 | -4.742314523 | 0.000174194703309202 | 0.00390380379810344 | 0.796911598196733 | Down |
| TARP | 1.75936692307692 | 5.201415625 | 3.07329926450572 | 0.006704160861893 | 0.0427156580667414 | -2.748555135 | Up |
| PPP1R1A | -1.759168205 | 6.4742225 | -6.382480722 | 5.89769795562494e-06 | 0.000453655598190596 | 4.12680903109057 | Down |
| XCR1 | 1.7580741025641 | 6.197261875 | 4.18090621295384 | 0.000590973305852142 | 0.00860325723891061 | -0.400382612 | Up |
| SLFN5 | 1.75535564102564 | 8.658203125 | 3.50741055779167 | 0.00259912398466313 | 0.0227479469435012 | -1.839921401 | Up |
| IGBP1P1 | -1.753901538 | 3.939535 | -5.889891647 | 1.57464716878152e-05 | 0.00085748368137362 | 3.16152797881856 | Down |
| CNBP | -1.752901282 | 9.126734375 | -7.416591651 | 8.34762881522084e-07 | 0.00012159886549772 | 6.04040644347622 | Down |
| GKAP1 | -1.75260641 | 5.369680625 | -7.12229738 | 1.43480782998902e-06 | 0.000179737797819977 | 5.51173206613353 | Down |
| CD8A | 1.74776769230769 | 7.16860125 | 3.96996235524003 | 0.000939301997737235 | 0.0115709892501383 | -0.852573276 | Up |
| RBM3 | 1.74651025641026 | 8.28273625 | 6.01139232584442 | 1.23223018494486e-05 | 0.000754787024610348 | 3.40270442390029 | Up |
| TCTN2 | 1.74637717948718 | 7.890288125 | 4.03442407608251 | 0.000815163902040661 | 0.0105726349832285 | -0.714391407 | Up |
| TSPAN33 | 1.74608205128205 | 7.835805 | 4.97800612166029 | 0.000105088307709248 | 0.00280673610972201 | 1.29364350016789 | Up |
| GABBR2 | 1.74579871794872 | 6.218528125 | 4.6013350667863 | 0.000236235794736377 | 0.00472613533727102 | 0.497780324910882 | Up |
| DUSP10 | 1.74362692307692 | 6.340946875 | 6.83435000796512 | 2.46539583942552e-06 | 0.000254252127564118 | 4.98216211975002 | Up |
| GRAMD1B | 1.74249538461539 | 6.9293075 | 5.09970752263395 | 8.11245819509242e-05 | 0.00242572348951105 | 1.54821847051836 | Up |
| TMEM229B | 1.73874512820513 | 5.60872375 | 5.34456445997787 | 4.84288184836698e-05 | 0.00173294040307882 | 2.05587964111616 | Up |
| CSF2RA | 1.73864794871795 | 6.041888125 | 3.90520589154069 | 0.00108314432500033 | 0.0127050049233934 | -0.991331057 | Up |
| FKBP11 | 1.73824743589744 | 7.480429375 | 4.63184287634142 | 0.000221133088034909 | 0.00452100779195582 | 0.56262355813048 | Up |
| CAPN6 | 1.73685897435898 | 6.31347125 | 3.17499699297209 | 0.00537697707025925 | 0.0370992316686005 | -2.538180398 | Up |
| COMMD6 | 1.7362841025641 | 8.9887675 | 9.24326692754635 | 3.72392262588849e-08 | 1.89976364282001e-05 | 9.04371338789696 | Up |
| KLHL30 | -1.731106154 | 5.14447625 | -4.359202195 | 0.000400050528803159 | 0.00669582122262772 | -0.018655324 | Down |
| FOLR2 | 1.72937538461538 | 7.3553175 | 5.40116922544133 | 4.30258012302745e-05 | 0.00161284402130866 | 2.17231065671054 | Up |
| ZNF106 | -1.725506667 | 8.1272825 | -5.741504059 | 2.12990931914128e-05 | 0.00104367567392419 | 2.86434366858858 | Down |
| RNU6-1319P | 1.72545115384616 | 5.946484063 | 4.10630587839249 | 0.00069608169952047 | 0.00952087803446221 | -0.560285194 | Up |
| AGA | 1.72537794871795 | 7.54157625 | 8.12142203747638 | 2.3910062003745e-07 | 5.60807305356662e-05 | 7.25517824387604 | Up |
| MS4A6A | 1.72477025641026 | 7.5463325 | 3.29200749189337 | 0.00416661555054552 | 0.0312355447528351 | -2.294037858 | Up |
| ATP2A3 | 1.7244176923077 | 7.509389375 | 3.18355379895324 | 0.00527784291502915 | 0.036708649603278 | -2.520398418 | Up |
| NDUFAF3 | 1.72356333333333 | 7.852631875 | 4.5256388413196 | 0.000278401260426539 | 0.00529689647082558 | 0.336650932311112 | Up |
| HMGN1P36 | -1.722256154 | 7.260476875 | -5.68325882 | 2.39984244656663e-05 | 0.00113454620491133 | 2.74691885677729 | Down |
| SOD1 | -1.72216359 | 9.52020875 | -10.07408269 | 1.03387181405306e-08 | 1.09529319864249e-05 | 10.2603604771975 | Down |
| VGLL2 | -1.720983077 | 4.60476125 | -4.786347224 | 0.000158438520401259 | 0.00368903755743471 | 0.890052945287972 | Down |
| DDT | 1.72040871794872 | 8.46994875 | 7.79554956935751 | 4.22755887566244e-07 | 7.76598901022434e-05 | 6.70249560538025 | Up |
| HSPA1A | -1.718909487 | 10.00416938 | -3.4608409 | 0.00287891332083023 | 0.0243907062045039 | -1.938533574 | Down |
| IL2RA | 1.71804743589744 | 6.388676875 | 4.1462624305626 | 0.000637632601988584 | 0.00905624805274097 | -0.47463261 | Up |
| CBX5 | 1.71761717948718 | 9.535910625 | 8.23421832947662 | 1.96924820513208e-07 | 5.03945164032395e-05 | 7.44293424262085 | Up |
| OAS2 | 1.71705076923077 | 7.16109375 | 3.94280502843478 | 0.000997132049397005 | 0.0120166270296256 | -0.910774119 | Up |
| CYSLTR1 | 1.71460179487179 | 6.139060625 | 3.15782709673164 | 0.00558143198637677 | 0.0380034701373901 | -2.573824834 | Up |
| GPAA1 | 1.71346358974359 | 8.6395525 | 5.37497976688998 | 4.54442112800367e-05 | 0.001662744477714 | 2.11848637066924 | Up |
| MFSD2A | 1.71183435897436 | 7.14297875 | 3.13147762858995 | 0.00591008251208749 | 0.0393448423619603 | -2.628428811 | Up |
| MINOS1 | -1.709196923 | 8.1806575 | -4.090438043 | 0.000720765195209184 | 0.00977246911270532 | -0.594303184 | Down |
| KCNJ15 | 1.7082958974359 | 9.62363375 | 3.1085607254546 | 0.006211254159871 | 0.0406988194276394 | -2.675820862 | Up |
| EPB41L4A-AS1 | -1.706639744 | 7.280641875 | -6.927691644 | 2.06605546874825e-06 | 0.00022930264195293 | 5.15515859727946 | Down |
| RNA5-8SP2 | -1.703923333 | 5.683035625 | -5.839399926 | 1.74454334897942e-05 | 0.000917915382473097 | 3.06072699329921 | Down |
| MB | -1.701190769 | 5.2044025 | -6.886097883 | 2.23499415038157e-06 | 0.000240541511332214 | 5.07822731734854 | Down |
| ANKRD12 | 1.70043282051282 | 8.376645 | 7.77029205277208 | 4.42105055134875e-07 | 7.92626347694503e-05 | 6.65901817362344 | Up |
| ZMAT1 | 1.69865307692308 | 7.623255625 | 4.74703754753934 | 0.000172430849846772 | 0.00387619559855965 | 0.806909033197801 | Up |
| PRKRA | -1.69842641 | 8.091611875 | -8.199362597 | 2.09058888490847e-07 | 5.1236932080829e-05 | 7.38510827721977 | Down |
| BRMS1L | -1.697334872 | 4.79262875 | -5.457649019 | 3.8249893484654e-05 | 0.00148800646418426 | 2.28811877758067 | Down |
| HLA-DQB1 | 1.69702423076923 | 7.526112188 | 3.10324414445447 | 0.00628323933390377 | 0.0409848267731773 | -2.686802082 | Up |
| ZNF738 | 1.69605076923077 | 6.68339125 | 5.83722844175293 | 1.75226058219841e-05 | 0.000918602091574029 | 3.05638437748328 | Up |
| UBE2F | -1.692894359 | 7.99595 | -8.338059686 | 1.64943673518461e-07 | 4.6882221935302e-05 | 7.61418666288875 | Down |
| KBTBD8 | 1.69160871794872 | 4.68035875 | 3.06305030270422 | 0.0068544511917912 | 0.0432798099496437 | -2.769652134 | Up |
| ZCCHC24 | -1.689918974 | 7.3195075 | -9.26135697 | 3.61842857146287e-08 | 1.89976364282001e-05 | 9.07115230686095 | Down |
| SNAI2 | 1.68955897435897 | 8.48832 | 3.01400510089397 | 0.00762031210987569 | 0.0465182331966665 | -2.870325579 | Up |
| UBA7 | 1.68900153846154 | 8.05869375 | 6.3290945242559 | 6.54980479287134e-06 | 0.000484623175579214 | 4.02382025908665 | Up |
| HSP90AA6P | -1.688973333 | 5.4588625 | -3.544563318 | 0.00239539445433577 | 0.0215454884314581 | -1.761104964 | Down |
| ST6GAL1 | 1.68636487179487 | 9.932748125 | 3.56658797036858 | 0.00228219150383197 | 0.020875603367273 | -1.714325374 | Up |
| RPL21 | -1.685880064 | 9.933555781 | -3.684359911 | 0.00176130034240371 | 0.0175280218105907 | -1.463564315 | Down |
| C3orf14 | 1.68524153846154 | 5.09861875 | 6.25738689528679 | 7.54512676617812e-06 | 0.000526509789039861 | 3.88485486885464 | Up |
| RNU5A-1 | 1.68514487179487 | 5.048216875 | 3.61218919189851 | 0.00206443437829227 | 0.0194643090836804 | -1.6173474 | Up |
| FAM105A | -1.683995385 | 6.94548375 | -3.628179112 | 0.00199307968997113 | 0.0189835342599743 | -1.583305817 | Down |
| IFI30 | 1.68373769230769 | 9.866696875 | 3.80737257945354 | 0.00134344538153048 | 0.0146247928572307 | -1.200767755 | Up |
| RNU6-100P | 1.68144846153846 | 5.636296875 | 3.46655229912209 | 0.00284305527266393 | 0.0241802955500654 | -1.926451034 | Up |
| APOBEC3C | 1.68060794871795 | 8.480570625 | 4.27887024318869 | 0.000476840745169615 | 0.0075194365681111 | -0.19053924 | Up |
| FAM46C | 1.67664794871795 | 8.696613125 | 4.06644707665836 | 0.000759769381067334 | 0.0101362020403757 | -0.64573737 | Up |
| NDUFAF1 | -1.674425385 | 6.181529375 | -4.520551214 | 0.000281495668562713 | 0.00532966656961101 | 0.325809704553582 | Down |
| PRKAA2 | -1.673918718 | 6.916654375 | -3.07938261 | 0.00661648048016558 | 0.0422957516596871 | -2.736023436 | Down |
| NIPAL2 | 1.67313256410256 | 7.467216875 | 5.7155451843061 | 2.24612655364532e-05 | 0.00108162131375643 | 2.81206262010887 | Up |
| MYO1G | 1.67311205128205 | 6.696686875 | 2.98993391416058 | 0.00802605309298368 | 0.0482737908936623 | -2.91955773 | Up |
| MOP-1 | 1.67028128205128 | 4.305106875 | 2.9859193792853 | 0.00809573428952931 | 0.0485057272714806 | -2.927756775 | Up |
| FICD | 1.66996153846154 | 7.15791375 | 4.94154887377227 | 0.000113593435491195 | 0.00294824298551591 | 1.21711480270249 | Up |
| NOD1 | -1.668389487 | 6.300196875 | -5.34991382 | 4.78896692509562e-05 | 0.00172513836357347 | 2.06689828056811 | Down |
| STAT1 | 1.66764461538462 | 10.00882125 | 3.73745702989087 | 0.0015670095407384 | 0.0161889589388253 | -1.350222349 | Up |
| TRIP10 | -1.665688462 | 8.102018125 | -7.762901037 | 4.4793997653533e-07 | 7.96957025428163e-05 | 6.64627801841242 | Down |
| OSTC | 1.66430435897436 | 9.488630625 | 5.10773893529677 | 7.97550807243221e-05 | 0.00241474346682758 | 1.56496839928613 | Up |
| MYL6B | -1.664262051 | 7.25247375 | -5.30932071 | 5.21402023613241e-05 | 0.00183025996405533 | 1.98320466332723 | Down |
| LSM3 | 1.66138 | 9.02578125 | 5.6018308398869 | 2.83751789914025e-05 | 0.00123846497519217 | 2.58204320039429 | Up |
| ANXA1 | 1.66061692307692 | 10.93151125 | 5.04112821800465 | 9.18697759029574e-05 | 0.00258912801326509 | 1.42585778859869 | Up |
| TXLNGY | -1.658528462 | 3.727340625 | -3.213148238 | 0.00494860231505055 | 0.0351627350451704 | -2.458807125 | Down |
| EPSTI1 | 1.65497871794872 | 5.798916875 | 3.21478065467958 | 0.00493104007535016 | 0.0350924430644843 | -2.455405755 | Up |
| USP6NL | 1.65348025641025 | 7.551069375 | 5.42675096333407 | 4.07909870580146e-05 | 0.00155345675712606 | 2.22481010080284 | Up |
| ALOX5AP | 1.65306461538461 | 8.291655 | 3.97155413349861 | 0.000936018838392922 | 0.0115375974224406 | -0.849161604 | Up |
| SAMD8 | -1.652127436 | 7.751903125 | -10.40364893 | 6.35000906417992e-09 | 7.39998306294207e-06 | 10.7191526272492 | Down |
| EDEM2 | 1.65005743589744 | 7.139755 | 8.01987992831025 | 2.85141767017407e-07 | 6.13339218741287e-05 | 7.08460084499908 | Up |
| TMEM50A | 1.64729666666667 | 10.31873188 | 7.24778295859389 | 1.13728996856062e-06 | 0.000153218597093887 | 5.73871075476051 | Up |
| MRPL40 | 1.64411871794872 | 7.163223125 | 4.34347416037804 | 0.000414030917148346 | 0.00687798901352567 | -0.052291391 | Up |
| OAS1 | 1.64280948717949 | 7.122209375 | 4.59494666278072 | 0.000239528888760221 | 0.00475528092873463 | 0.484194720956443 | Up |
| TYMS | 1.64164743589744 | 6.302671875 | 3.19156859651305 | 0.00518661435647618 | 0.0363234437519202 | -2.503731997 | Up |
| CTSC | 1.64123051282051 | 9.238963125 | 4.14976189474512 | 0.000632755374192481 | 0.0090144434635111 | -0.467131723 | Up |
| LAIR1 | 1.64027794871795 | 6.7477325 | 3.33150518050454 | 0.00382200978944436 | 0.0294283390031648 | -2.211182417 | Up |
| RPL21P28 | -1.638740256 | 10.05295688 | -3.813176813 | 0.00132638653317962 | 0.0145243859603995 | -1.188351136 | Down |
| LAMP5 | 1.63670205128205 | 5.12479375 | 3.62932304249036 | 0.00198807005168038 | 0.0189747343948739 | -1.580869769 | Up |
| SLC4A5 | 1.63648820512821 | 7.69683 | 3.69333637079426 | 0.00172684242842794 | 0.0173256635726948 | -1.44441406 | Up |
| PLK4 | 1.63618358974359 | 4.9724725 | 3.52321640508523 | 0.0025104307883423 | 0.0221883239984429 | -1.806405643 | Up |
| SNX2 | 1.63602051282052 | 9.79812 | 3.72308901215937 | 0.0016173681441141 | 0.0165688794291384 | -1.380907585 | Up |
| RPL7AP6 | -1.635452051 | 7.083151875 | -5.44300405 | 3.94333946311258e-05 | 0.00151412541790387 | 2.25812577379386 | Down |
| PDLIM3 | -1.634545128 | 7.47158875 | -2.969168081 | 0.00839288652932843 | 0.0496101968904534 | -2.96193162 | Down |
| NME5 | 1.63370615384615 | 5.99706625 | 3.75528208221207 | 0.00150670530488254 | 0.0157545000183478 | -1.312139718 | Up |
| BRI3BP | 1.6308741025641 | 7.285931875 | 5.01380142282353 | 9.73700967041067e-05 | 0.00268251163579505 | 1.36866515448635 | Up |
| IGBP1 | -1.630141282 | 8.237586875 | -10.6038198 | 4.74890904310517e-09 | 6.51075429809719e-06 | 10.9914825312806 | Down |
| PGK1 | 1.62800435897436 | 9.200736875 | 10.8210918649982 | 3.48039383056563e-09 | 5.06984618806207e-06 | 11.281793717288 | Up |
| DCUN1D2 | -1.626926923 | 5.904211875 | -6.885018704 | 2.23956356283908e-06 | 0.000240541511332214 | 5.07622791426997 | Down |
| SASS6 | 1.62582076923077 | 5.833249375 | 7.23661822403786 | 1.16094861835364e-06 | 0.000154092674209162 | 5.71860964551952 | Up |
| ZEB2 | 1.62468551282051 | 6.179125313 | 4.50933467694541 | 0.000288441767127785 | 0.00543000795729164 | 0.3019035157312 | Up |
| MS4A4A | 1.62191333333333 | 6.33759125 | 4.57537685741671 | 0.000249910098218163 | 0.0048987844063673 | 0.442562238875293 | Up |
| PACSIN3 | -1.619859744 | 6.809620625 | -6.139550177 | 9.5340110353837e-06 | 0.000617247764449133 | 3.65493418734363 | Down |
| CRTAM | 1.61882948717949 | 5.005985625 | 3.1448918097902 | 0.00574047163884284 | 0.0386345927343262 | -2.600645519 | Up |
| GTF2A2 | 1.61841974358974 | 7.280319375 | 5.02735217956146 | 9.46017252463949e-05 | 0.00264897544384632 | 1.39703451255892 | Up |
| TRGV4 | 1.61824076923077 | 5.709370625 | 3.12690555974533 | 0.0059690050678041 | 0.0396207158215854 | -2.63789126 | Up |
| NNMT | -1.617683846 | 7.786841875 | -3.049555945 | 0.00705735091744626 | 0.0441642687659837 | -2.797398843 | Down |
| KDSR | -1.615407436 | 8.031248125 | -6.417814002 | 5.50338673050983e-06 | 0.000435326220186843 | 4.19474926978353 | Down |
| CHGA | -1.615391538 | 4.397374375 | -11.31843044 | 1.73880545369992e-09 | 3.35639858277262e-06 | 11.9262255728131 | Down |
| TLR7 | 1.61467461538462 | 5.231183125 | 3.77778747808257 | 0.0014338677417425 | 0.0152696330505455 | -1.264036416 | Up |
| PLCH1 | 1.61427948717949 | 6.24442875 | 5.67738357595732 | 2.42895951332717e-05 | 0.0011355527934653 | 2.73505032633572 | Up |
| SVIL | -1.614257436 | 7.9950425 | -4.810455646 | 0.000150435182303821 | 0.00358588149594014 | 0.940986207876133 | Down |
| HSPA1B | -1.61363735 | 8.873391875 | -3.137218078 | 0.00583690757225692 | 0.0390473033256579 | -2.61654308 | Down |
| TBX15 | -1.613435128 | 4.900830625 | -3.636421882 | 0.00195726103822506 | 0.0187727913653957 | -1.565750468 | Down |
| SLC30A7 | 1.61292923076923 | 8.743675 | 11.266991019072 | 1.86614835735575e-09 | 3.35639858277262e-06 | 11.860840809028 | Up |
| STARD5 | 1.61261512820513 | 6.845983125 | 7.11957357900924 | 1.44209757550675e-06 | 0.000179737797819977 | 5.50677961216999 | Up |
| NT5E | -1.607164872 | 7.956111875 | -3.494460634 | 0.0026741023938973 | 0.023169258176418 | -1.867364098 | Down |
| C4orf33 | 1.60680461538462 | 6.33416875 | 6.47698647403995 | 4.90303749814623e-06 | 0.000410494117997998 | 4.30813032175654 | Up |
| CHRNA1 | -1.606762051 | 4.6518025 | -3.450062119 | 0.00294781059111076 | 0.0248409684627726 | -1.961327159 | Down |
| ARPC1B | 1.60644487179487 | 9.314553125 | 4.41597215510116 | 0.000353446248747953 | 0.00617278375119602 | 0.102674919358283 | Up |
| DDX26B | 1.60632076923077 | 6.176225625 | 3.77456679532516 | 0.00144407145361 | 0.0153264906053225 | -1.270921733 | Up |
| BIN1 | -1.605537949 | 8.25762375 | -5.558669881 | 3.10203693557644e-05 | 0.00129568413723083 | 2.49431921022973 | Down |
| RPL29 | -1.604055769 | 9.357629688 | -8.177255792 | 2.17156908811982e-07 | 5.16456742212334e-05 | 7.34834332476514 | Down |
| P2RY8 | 1.60191102564102 | 6.698859375 | 3.00666960855573 | 0.00774179681756432 | 0.0470380757108894 | -2.885341374 | Up |
| YBX3 | -1.601862308 | 9.701786875 | -4.531296434 | 0.000275000725070027 | 0.00524933816478879 | 0.348705060324304 | Down |
| CYSLTR2 | 1.60144794871795 | 4.264293125 | 4.97990977825582 | 0.000104662507752875 | 0.00280387249217961 | 1.29763624228712 | Up |
| ID2 | 1.60113769230769 | 9.216504375 | 3.6061608543225 | 0.00209199070462452 | 0.0196288354881979 | -1.630176603 | Up |
| GLIPR2 | 1.60095153846154 | 8.255343125 | 5.60242021780417 | 2.83407096450383e-05 | 0.00123846497519217 | 2.58323952504061 | Up |
| PPP1R3A | -1.600693333 | 3.21106 | -4.698917535 | 0.00019128754141864 | 0.0041571896870908 | 0.704975813500814 | Down |
| CYP19A1 | -1.599472821 | 3.584025 | -6.531072157 | 4.41359809584351e-06 | 0.000391132056349144 | 4.4113265627805 | Down |
| CDKN1B | 1.59933076923077 | 8.25572625 | 6.18515773040562 | 8.7066998056425e-06 | 0.000583123713707212 | 3.74415141309965 | Up |
| SNORD31 | 1.5988041025641 | 5.668245 | 3.45624747389845 | 0.00290807704172374 | 0.024593088393126 | -1.948248623 | Up |
| SENP1 | 1.59692051282051 | 8.25765125 | 7.05711689689919 | 1.62024757950058e-06 | 0.000194329546920493 | 5.39292127374888 | Up |
| IER3 | 1.59528726495726 | 7.82952979166667 | 3.50356934508759 | 0.00262114394670332 | 0.0228414598266281 | -1.848063104 | Up |
| UCP3 | -1.594871538 | 5.680696875 | -5.761133039 | 2.04615605829409e-05 | 0.00102182520865907 | 2.90381924855308 | Down |
| SAT1 | 1.59389025641025 | 10.8388225 | 5.15377136248495 | 7.23496483674e-05 | 0.00226646942809004 | 1.66084710119581 | Up |
| FHL3 | -1.593535897 | 6.81136875 | -4.143741443 | 0.000641169595500962 | 0.00908986603548718 | -0.480036275 | Down |
| CHIC2 | 1.59319641025641 | 7.75758875 | 3.8201362780348 | 0.0013062179251678 | 0.0144147827565748 | -1.173461539 | Up |
| LRRC39 | -1.590383077 | 3.91564375 | -3.401315099 | 0.00328033725360393 | 0.0267137737140974 | -2.06425658 | Down |
| ASB16-AS1 | 1.58965769230769 | 7.195826875 | 6.51433677983002 | 4.55938767004777e-06 | 0.000392124163932854 | 4.37944003352125 | Up |
| SCHIP1 | -1.588182308 | 5.756811875 | -4.813775637 | 0.000149365796135074 | 0.00357419775207411 | 0.947996708783857 | Down |
| IQCG | 1.58765717948718 | 6.090948125 | 8.04401195941078 | 2.73421346076761e-07 | 6.06917267905816e-05 | 7.12527336375074 | Up |
| TMEM256 | 1.58560794871795 | 6.862233125 | 5.43052389849298 | 4.04716197348409e-05 | 0.00154381676130923 | 2.23254661677573 | Up |
| RN7SL337P | -1.585229744 | 6.4372875 | -5.651927297 | 2.55938212390215e-05 | 0.00118121820122351 | 2.68357633687586 | Down |
| C4orf46 | 1.58389615384615 | 5.972755625 | 7.42549443449093 | 8.21345943003812e-07 | 0.000120396917569747 | 6.05620151759295 | Up |
| CTSF | -1.583263333 | 6.871781875 | -6.001769207 | 1.25630684594597e-05 | 0.000760538796323707 | 3.38367486430926 | Down |
| SLC10A7 | 1.58215076923077 | 7.3082075 | 7.48169231490635 | 7.41672731017024e-07 | 0.000112247833388401 | 6.15563826848741 | Up |
| MLYCD | -1.58010641 | 6.544006875 | -7.61477938 | 5.83446120191605e-07 | 9.50470126600206e-05 | 6.38928022572107 | Down |
| GBP4 | 1.5795317948718 | 7.67031625 | 3.25337130243764 | 0.00453324025746668 | 0.033141854040394 | -2.374878471 | Up |
| RN7SL45P | -1.577854872 | 5.43190625 | -3.347375376 | 0.00369159893044432 | 0.0288822075434259 | -2.177833656 | Down |
| MMP3 | -1.57670641 | 3.825269375 | -4.238196791 | 0.000521245112579998 | 0.00792993462069322 | -0.277638167 | Down |
| ABCC4 | 1.57389923076923 | 6.859313125 | 3.9921577136427 | 0.000894548374522945 | 0.01124554420982 | -0.804998995 | Up |
| ADSSL1 | -1.572402821 | 6.990659375 | -3.468742276 | 0.00282942351777516 | 0.0241116540873073 | -1.921817236 | Down |
| PEBP4 | 1.57129230769231 | 8.366255 | 3.08029397206094 | 0.00660344160829853 | 0.0422355690352947 | -2.73414543 | Up |
| AGPAT9 | -1.57123359 | 6.875749375 | -3.370031613 | 0.00351299900841738 | 0.0280305609478535 | -2.130170536 | Down |
| ZNF283 | -1.568295897 | 5.18620625 | -5.819472749 | 1.81669811860246e-05 | 0.000934487582232039 | 3.020852797 | Down |
| HSP90AA2 | -1.567643846 | 7.116289375 | -3.429289353 | 0.00308522467884862 | 0.0256811898535446 | -2.005220466 | Down |
| ATL2 | -1.567624872 | 8.939868125 | -4.985129027 | 0.000103504115408127 | 0.00278512109325235 | 1.30858143686332 | Down |
| AGER | -1.567188205 | 7.39173625 | -3.206165919 | 0.00502441642906403 | 0.0355291485777292 | -2.473351078 | Down |
| NLRC5 | 1.5669117948718 | 6.9194925 | 3.01277784793833 | 0.00764050692330054 | 0.0466048926619643 | -2.872838541 | Up |
| SNX29P1 | 1.565825 | 7.166207813 | 3.57629072286278 | 0.0022340231230829 | 0.0205722548122059 | -1.693704483 | Up |
| MANEA | 1.56544769230769 | 8.43514625 | 4.2794186559562 | 0.000476268907205832 | 0.00751550400829135 | -0.189365149 | Up |
| RBBP9 | 1.56082256410256 | 7.464905 | 3.52393440298935 | 0.00250647390268942 | 0.022178206633403 | -1.804882617 | Up |
| REPS1 | 1.56072641025641 | 8.494756875 | 7.7422182755761 | 4.64698550326286e-07 | 8.08263366601101e-05 | 6.61058424178462 | Up |
| DPH5 | -1.559697692 | 6.049305625 | -7.557678846 | 6.46526866207859e-07 | 0.000101131554836957 | 6.28935405576384 | Down |
| LOC646903 | -1.559449744 | 4.85893375 | -6.853691223 | 2.37652384829316e-06 | 0.00024838404184829 | 5.01811308801876 | Down |
| SNORA44 | 1.55829230769231 | 6.5644225 | 3.15459016950693 | 0.00562082062988418 | 0.0381492330869862 | -2.580539111 | Up |
| VAMP1 | 1.55812205128205 | 7.8309475 | 3.36374829368178 | 0.00356165788479499 | 0.0282929653445525 | -2.143395396 | Up |
| KLRB1 | 1.55665794871795 | 5.14961125 | 3.37369506517953 | 0.00348493222451389 | 0.0278734781594871 | -2.122457659 | Up |
| SNORD36C | 1.5563917948718 | 6.347245 | 3.17001731602018 | 0.00543550624427284 | 0.0373152707025824 | -2.548523177 | Up |
| ARPP21 | -1.555992564 | 3.500199375 | -4.938628 | 0.000114304570832684 | 0.0029634000360371 | 1.21097836474808 | Down |
| MON1B | 1.55400205128205 | 7.19377 | 7.94719374391269 | 3.23715733169479e-07 | 6.3939344008314e-05 | 6.96158857995727 | Up |
| HIST1H4B | -1.553289487 | 8.267105625 | -5.325993517 | 5.0349381621674e-05 | 0.00178886133758591 | 2.01760230208655 | Down |
| UQCRHL | -1.553117692 | 8.007941875 | -4.092308591 | 0.000717810180279574 | 0.00974374016993363 | -0.590292984 | Down |
| CSF1R | 1.55275538461539 | 7.23467375 | 3.73135068821642 | 0.00158821754537772 | 0.0163573072603264 | -1.363264729 | Up |
| PM20D2 | -1.55156359 | 7.49541125 | -6.87772535 | 2.27070006824025e-06 | 0.000241984141297169 | 5.06271100265669 | Down |
| NPC2 | 1.55026897435897 | 11.36821688 | 6.366018268 | 6.09129338474706e-06 | 0.000463505428628654 | 4.09509386841386 | Up |
| MRPS11 | 1.54680871794872 | 8.74989875 | 3.64647355772531 | 0.00191444823922 | 0.0184685617183363 | -1.544336291 | Up |
| TGFBR3 | -1.546516667 | 7.923801875 | -3.536049816 | 0.00244063171927468 | 0.0217945607207414 | -1.779176384 | Down |
| VWF | -1.545816667 | 7.483630625 | -4.529264509 | 0.000276217146570884 | 0.00526824307293583 | 0.344376019199171 | Down |
| NECAP1 | 1.54576743589744 | 7.865339375 | 8.41689892614168 | 1.44310712782911e-07 | 4.42559181951486e-05 | 7.74318933880491 | Up |
| SLC9A1 | 1.5447358974359 | 7.38559125 | 5.62366243459234 | 2.71267072776071e-05 | 0.00120505257288657 | 2.62632862001618 | Up |
| CST7 | 1.54425461538461 | 8.219496875 | 4.63944212831483 | 0.000217526317434631 | 0.00449059865407347 | 0.578766344981332 | Up |
| ABR | 1.54408461538462 | 7.33759875 | 4.15954870830416 | 0.000619314217471963 | 0.0088991100287417 | -0.446155053 | Up |
| WDR75 | 1.54349538461539 | 7.45809 | 7.59234601486568 | 6.07428131913754e-07 | 9.76367411759577e-05 | 6.35007852568399 | Up |
| HSP90AB3P | -1.542796923 | 7.7131975 | -4.319941267 | 0.000435878274421255 | 0.00710917770604352 | -0.102634923 | Down |
| CLN6 | 1.5404658974359 | 7.723041875 | 8.2940891801481 | 1.77767690123089e-07 | 4.81771110895212e-05 | 7.54185800139311 | Up |
| FOXO4 | -1.540289487 | 7.140058125 | -6.450331661 | 5.16460376566895e-06 | 0.00042235585953139 | 4.25711855964272 | Down |
| SCN7A | -1.538850769 | 3.40406375 | -5.552101925 | 3.14445962908566e-05 | 0.00130405552624732 | 2.48095006889721 | Down |
| LGALS9C | 1.53798551282051 | 7.229836563 | 4.11789198420255 | 0.000678598231255279 | 0.0093907780432871 | -0.5354474 | Up |
| IMPA2 | -1.537084872 | 6.747821875 | -3.644196678 | 0.00192406363804101 | 0.0185306409966206 | -1.549187569 | Down |
| PIGM | 1.53364743589744 | 7.560731875 | 4.63877489733775 | 0.000217840589266073 | 0.00449310673807467 | 0.577349121586377 | Up |
| IGHV3OR15-7 | 1.53217128205128 | 4.0401125 | 3.58856538842772 | 0.00217453212067146 | 0.0201438076854093 | -1.66760695 | Up |
| LINC00467 | 1.53180974358974 | 6.33206875 | 6.07713000638877 | 1.08000113511383e-05 | 0.000685874290356897 | 3.53236398332824 | Up |
| FCER1G | 1.53077384615384 | 7.79315375 | 3.56617043699961 | 0.00228428731248522 | 0.0208791547500106 | -1.715212572 | Up |
| TSPAN8 | -1.529562821 | 3.637796875 | -4.112441856 | 0.000686766684257008 | 0.00943256765026092 | -0.54713104 | Down |
| NPIPB5 | 1.52798302564102 | 10.75927288 | 6.59738763315575 | 3.88175366543248e-06 | 0.000356189105040295 | 4.53728393879057 | Up |
| OLFM2 | 1.52670461538462 | 7.6023575 | 3.79429096493308 | 0.0013827018501111 | 0.0149197370465461 | -1.228747601 | Up |
| BRCA1 | -1.526611282 | 5.779295 | -4.072956697 | 0.000748980699681227 | 0.0100267048635671 | -0.631781308 | Down |
| CDC37 | 1.52578846153846 | 8.366453125 | 8.97205694843668 | 5.75600421336041e-08 | 2.53283927180651e-05 | 8.62712427219518 | Up |
| UPF3B | 1.52391769230769 | 5.709723125 | 5.53996327766787 | 3.22444104969698e-05 | 0.00132861902695832 | 2.45622800487245 | Up |
| TGFB1 | 1.52301025641026 | 7.9113625 | 4.77134321907289 | 0.00016363731357973 | 0.00378362586071704 | 0.858331725087832 | Up |
| BRCA2 | 1.5229582051282 | 4.748676875 | 3.4065504848114 | 0.00324291651531115 | 0.0265202299025814 | -2.053214609 | Up |
| MNS1 | 1.52285128205128 | 5.2236 | 5.53297874495802 | 3.27140737468559e-05 | 0.00134001215609485 | 2.44199497054802 | Up |
| ZNF860 | 1.52271 | 5.133351875 | 3.87514905133042 | 0.00115722600269841 | 0.0132995396671064 | -1.05570545 | Up |
| TDP2 | -1.520689487 | 7.863713125 | -7.704592875 | 4.96881379052492e-07 | 8.45314912523827e-05 | 6.54549185254269 | Down |
| ACADL | -1.51940359 | 7.24581125 | -3.418733809 | 0.00315746022321884 | 0.0260719022084169 | -2.02750679 | Down |
| CCBL2 | 1.51897820512821 | 7.853613125 | 7.61116858472225 | 5.87238590253699e-07 | 9.50470126600206e-05 | 6.38297541805496 | Up |
| PMPCB | 1.51842974358974 | 8.4294675 | 7.74383079523119 | 4.63368798369798e-07 | 8.08263366601101e-05 | 6.61336932045873 | Up |
| ABHD11 | 1.51822487179487 | 7.317814375 | 3.67382974430292 | 0.0018025973047611 | 0.0178248346975252 | -1.486023116 | Up |
| RNU6-23P | 1.51796948717949 | 5.436936875 | 3.25385420485851 | 0.00452846778226733 | 0.0331173513025744 | -2.373869389 | Up |
| LOC151760 | 1.51773512820513 | 4.987533125 | 3.51444249834768 | 0.00255928735771169 | 0.0224921985091201 | -1.825013217 | Up |
| THBS4 | -1.517508974 | 5.784900625 | -3.740163875 | 0.0015576990572359 | 0.016143688077259 | -1.344440267 | Down |
| DDX50 | -1.516665641 | 7.8953625 | -6.872589075 | 2.29289704117904e-06 | 0.000242911596994363 | 5.05318718028369 | Down |
| SLC22A5 | -1.516127949 | 6.586059375 | -6.114071026 | 1.00311656030415e-05 | 0.000644067153471315 | 3.60496710490141 | Down |
| LILRB1 | 1.51398487179487 | 6.275619375 | 3.19398783112219 | 0.00515938245735634 | 0.0362524789193157 | -2.498699271 | Up |
| ZAK | -1.512156923 | 6.5756725 | -4.514647222 | 0.000285130418926551 | 0.00538536035163786 | 0.31322715322923 | Down |
| TNFRSF21 | 1.51206102564103 | 6.46509625 | 5.53897251062856 | 3.23106086721663e-05 | 0.00132861902695832 | 2.45420938378653 | Up |
| PCSK1 | -1.511765385 | 3.742290625 | -4.9729825 | 0.000106220486597039 | 0.00282611972730273 | 1.2831053413936 | Down |
| CTBP1-AS2 | 1.51095384615385 | 7.7536 | 7.29702729993642 | 1.03876879475133e-06 | 0.000145036583040507 | 5.82715244923292 | Up |
| NID2 | 1.51075179487179 | 8.5536925 | 3.30778671813321 | 0.00402542173961845 | 0.0304686126513064 | -2.260962307 | Up |
| LRRC16A | 1.51070333333333 | 7.942523125 | 7.2109832341187 | 1.21722723586374e-06 | 0.000159381545990316 | 5.67238688113467 | Up |
| NDRG3 | 1.50998641025641 | 8.674780625 | 8.00922908369474 | 2.90480189638637e-07 | 6.13339218741287e-05 | 7.06662313817474 | Up |
| CTH | -1.509946154 | 6.30428875 | -2.994964658 | 0.0079395558716948 | 0.0478776788361166 | -2.909278451 | Down |
| RNA5-8SP5 | -1.509262564 | 3.4330375 | -4.807297979 | 0.000151459527614756 | 0.00359832645457619 | 0.934317666348815 | Down |
| IGHV5-78 | 1.50649256410256 | 6.457111875 | 3.27651958644966 | 0.0043099403412462 | 0.031940152474857 | -2.326469443 | Up |
| KIF18A | 1.50621743589744 | 4.992335 | 4.37127394447037 | 0.000389645109990132 | 0.00661431797417334 | 0.00715527969428198 | Up |
| BST2 | 1.50616974358974 | 6.57592625 | 3.08484673946594 | 0.00653867971297483 | 0.0419595286537182 | -2.724761398 | Up |
| RNU6-824P | -1.505727949 | 3.980929375 | -4.736842362 | 0.00017626133267608 | 0.003932174907066 | 0.785326388365388 | Down |
| KIAA1598 | 1.50572358974359 | 7.69747375 | 4.19047442366873 | 0.000578704490486532 | 0.00850969435947609 | -0.379878664 | Up |
| PFKM | -1.505354872 | 7.6788225 | -4.454279921 | 0.000325144197705405 | 0.00583382279901454 | 0.18447068670079 | Down |
| PDE4DIP | -1.504808333 | 6.197746563 | -4.335418039 | 0.000421382391897263 | 0.00693095229918809 | -0.069523624 | Down |
| UQCRH | -1.504506923 | 5.669918125 | -4.005560501 | 0.000868567768732539 | 0.0110627565307912 | -0.776268501 | Down |
| NFATC2 | 1.50414435897436 | 8.011840625 | 4.9165129616924 | 0.00011983855685698 | 0.00306790804317065 | 1.16449277742913 | Up |
| SORL1 | 1.50373717948718 | 7.812543125 | 3.09458331504799 | 0.00640225355989778 | 0.0413859327349867 | -2.704679711 | Up |
| IFI27L2 | 1.50306948717949 | 7.543830625 | 9.30269062348512 | 3.38895153435223e-08 | 1.89976364282001e-05 | 9.1336851685956 | Up |
| FKBP4 | -1.500192821 | 8.45434 | -5.195147742 | 6.6294919706867e-05 | 0.0021550009673751 | 1.746843928 | Down |
| LY6G5B | 1.49978858974359 | 7.438311563 | 3.74762132810655 | 0.00153233314733814 | 0.0159437895825938 | -1.328508555 | Up |
| FBXO16 | 1.49914256410256 | 6.46632 | 3.40442576501634 | 0.00325805213349438 | 0.0266159905626896 | -2.057696238 | Up |
| KLF10 | -1.498815641 | 8.042445625 | -4.599541946 | 0.00023715543884926 | 0.00473377166174695 | 0.493967317791443 | Down |
| DERL3 | 1.49880307692308 | 7.2444375 | 3.1446349012289 | 0.00574367484029883 | 0.0386345927343262 | -2.601177917 | Up |
| UFC1 | 1.4891858974359 | 10.34220688 | 5.7678876624079 | 2.01812638228623e-05 | 0.0010159065138649 | 2.91739196306868 | Up |
| ISLR | 1.48880461538461 | 8.25825375 | 3.03725112690713 | 0.00724745919252733 | 0.044924609414956 | -2.822668672 | Up |
| PADI2 | -1.488610256 | 5.9960275 | -3.288829216 | 0.0041956394651259 | 0.0313576061724514 | -2.300695869 | Down |
| C11orf1 | 1.48766051282051 | 7.6594875 | 3.28680622644646 | 0.0042142168884239 | 0.0314608433755592 | -2.304933 | Up |
| RAD21 | -1.487126923 | 8.756279375 | -7.064622049 | 1.59768232706037e-06 | 0.000192938766822777 | 5.40663340083475 | Down |
| TNFAIP2 | 1.48710641025641 | 6.937480625 | 4.11673014396345 | 0.000680331304325147 | 0.00939365030207713 | -0.537938063 | Up |
| ZNRF2 | -1.486544103 | 8.38994625 | -6.133843741 | 9.64309838104587e-06 | 0.000622580869714781 | 3.64375107753766 | Down |
| ACSL1 | -1.485419744 | 8.689083125 | -4.554484828 | 0.000261498180874355 | 0.00508318440503635 | 0.398092101237246 | Down |
| ATP5E | 1.48456743589743 | 7.864914375 | 8.72437700173897 | 8.63333893550302e-08 | 3.14586337579081e-05 | 8.23800754385942 | Up |
| TCEAL1 | -1.483800513 | 6.85252875 | -4.631345193 | 0.000221371411321889 | 0.00452191365791348 | 0.561566219455203 | Down |
| SETD7 | -1.482665641 | 7.6781875 | -6.00701453 | 1.24312363985513e-05 | 0.000756487798279465 | 3.39404895480074 | Down |
| OPTN | -1.481815385 | 7.541675 | -3.669471013 | 0.00181997245764375 | 0.0178854250872767 | -1.495317467 | Down |
| CRIM1 | -1.480791026 | 8.961440625 | -6.208923817 | 8.30535795816539e-06 | 0.000559459473788904 | 3.79052828341534 | Down |
| ACE2 | -1.47926641 | 5.078819375 | -5.24275192 | 5.99669995827339e-05 | 0.00202852084074714 | 1.84556373075467 | Down |
| RASSF6 | 1.47889692307692 | 5.81738375 | 3.47467652910285 | 0.00279280969355611 | 0.0238782155274073 | -1.909258474 | Up |
| RPS3AP25 | -1.47825 | 9.488921875 | -4.173307223 | 0.000600903854423629 | 0.00869435091168192 | -0.416667682 | Down |
| GPR137B | 1.47658256410256 | 8.19691 | 8.66093255132749 | 9.58958693671367e-08 | 3.33588810050725e-05 | 8.13698182572752 | Up |
| KIAA1551 | 1.47650128205128 | 9.081880625 | 3.04162255135838 | 0.007179356562076 | 0.0446568623945304 | -2.813694698 | Up |
| C11orf24 | 1.47609358974359 | 7.634509375 | 6.29033504856386 | 7.06968072525464e-06 | 0.000502197335925507 | 3.94879626669496 | Up |
| RPL23P8 | -1.472803846 | 5.219186875 | -3.365117082 | 0.00355100144070081 | 0.0282468227230081 | -2.140514837 | Down |
| ANAPC5 | 1.47266128205128 | 7.888690625 | 8.40346072896367 | 1.47627385917533e-07 | 4.46850842023368e-05 | 7.72126259434991 | Up |
| ARHGAP18 | 1.47108282051282 | 8.380358125 | 5.87018587240831 | 1.63882682552177e-05 | 0.000886221271982273 | 3.12222749199272 | Up |
| GTPBP4 | -1.470364359 | 6.779735625 | -5.238977225 | 6.04453605525641e-05 | 0.00203787709588702 | 1.83774466290919 | Down |
| PDCD2L | -1.469569744 | 5.77695125 | -9.176731895 | 4.14044955133803e-08 | 1.98215432056025e-05 | 8.94242084185495 | Down |
| FANCD2 | 1.46869794871795 | 5.22540375 | 3.25915693267757 | 0.00447638528968228 | 0.0327879044458281 | -2.362786466 | Up |
| RUNX2 | 1.46836846153846 | 6.818119375 | 3.99712412042748 | 0.000884831379903058 | 0.0111977378647683 | -0.794353095 | Up |
| CAMK1D | 1.46529974358974 | 7.272889375 | 6.4148767032383 | 5.53510094626915e-06 | 0.000435833100522619 | 4.18910807680187 | Up |
| CD97 | 1.46522794871795 | 8.284844375 | 4.51922748633259 | 0.00028230649925261 | 0.00533634840071418 | 0.322988745740469 | Up |
| RPP21 | 1.46367769230769 | 8.008358125 | 3.87681765616468 | 0.00115298328894177 | 0.013270410624872 | -1.052132323 | Up |
| RPS6KA1 | 1.46309128205128 | 7.808475 | 5.8026539681459 | 1.87998932472996e-05 | 0.000958794555612279 | 2.98715829286716 | Up |
| ZNF280C | 1.46261 | 7.038870625 | 8.21830783518698 | 2.0236979938784e-07 | 5.06453266230708e-05 | 7.41656001716444 | Up |
| TSPAN3 | -1.46141359 | 10.11826813 | -5.384525283 | 4.45469831847142e-05 | 0.00164802624934307 | 2.13811325911652 | Down |
| ANK3 | 1.45999564102564 | 8.400403125 | 5.04738687529229 | 9.06553998816751e-05 | 0.00257671390858805 | 1.43894667931459 | Up |
| SH3KBP1 | 1.45971487179487 | 8.357645 | 4.72424718916686 | 0.000181113489599069 | 0.00402787414321135 | 0.758652650242733 | Up |
| RNU6-158P | -1.456627949 | 5.037483125 | -5.017519517 | 9.66023563956004e-05 | 0.00267275341903651 | 1.37645093034907 | Down |
| RPS27A | 1.45403188034188 | 9.81256645833334 | 3.62694146111463 | 0.0019985139185374 | 0.0190077950570711 | -1.585941347 | Up |
| HDHD2 | 1.45353615384615 | 8.853218125 | 4.25789412741313 | 0.000499241848251674 | 0.00772631457981525 | -0.235452752 | Up |
| GADD45GIP1 | -1.453488462 | 6.842860625 | -7.90206311 | 3.50370557832321e-07 | 6.74883189371728e-05 | 6.88482763482046 | Down |
| MAPK12 | -1.452656923 | 5.99799625 | -5.422294924 | 4.11715136696611e-05 | 0.00156277514468394 | 2.21567073813973 | Down |
| EFNA1 | -1.451930769 | 6.33110625 | -3.758796252 | 0.00149509291284638 | 0.0156765617887113 | -1.304630013 | Down |
| TMEM248 | 1.45191897435897 | 9.7064275 | 9.58294324608877 | 2.18470050393846e-08 | 1.54299438319072e-05 | 9.55179009004978 | Up |
| AHCY | -1.451844872 | 8.299559375 | -5.816405919 | 1.8280730763001e-05 | 0.000935465797976576 | 3.01471149243633 | Down |
| HPS3 | 1.4505958974359 | 8.6339925 | 6.01264388985523 | 1.22913401515658e-05 | 0.000754787024610348 | 3.40517845241753 | Up |
| SFXN2 | 1.44992435897436 | 7.058296875 | 5.43268876402404 | 4.02895314031995e-05 | 0.00154191807621407 | 2.23698499336117 | Up |
| OLFML1 | 1.44949102564102 | 6.304748125 | 3.41167030412432 | 0.00320673001244289 | 0.0263353094849622 | -2.042413388 | Up |
| COL12A1 | -1.449426154 | 6.35272125 | -4.054884763 | 0.000779319299617076 | 0.0103202243841904 | -0.670525982 | Down |
| CD200 | 1.44898153846154 | 7.7453575 | 4.16859655004682 | 0.00060714424407043 | 0.00876014916552687 | -0.426763347 | Up |
| SCARNA13 | 1.44862282051282 | 8.925369375 | 3.55191706761325 | 0.00235699049601538 | 0.0213171817969075 | -1.745490352 | Up |
| PEG10 | 1.44772948717949 | 6.951176875 | 4.18965790326436 | 0.000579741364249793 | 0.00851956618951446 | -0.381628347 | Up |
| PNPLA4 | 1.44730846153846 | 7.586788125 | 4.32818954613681 | 0.000428091032064327 | 0.00701653845592353 | -0.084987412 | Up |
| HINT2 | 1.44436948717949 | 8.198426875 | 3.0237056458058 | 0.00746250430699557 | 0.0458309849494455 | -2.850451637 | Up |
| SLC25A45 | 1.4442682051282 | 7.37906125 | 4.93134212034532 | 0.000116098327474227 | 0.00300191229541681 | 1.19566824728202 | Up |
| LMAN2 | 1.44406384615385 | 10.74798188 | 3.99306104851978 | 0.000892773014621205 | 0.01124554420982 | -0.803062641 | Up |
| LOC100133315 | 1.44352282051282 | 6.523115625 | 5.25140120260344 | 5.88854711982602e-05 | 0.00200552742490093 | 1.86347448928949 | Up |
| VIT | -1.442752821 | 5.06085 | -3.345186947 | 0.00370931767999571 | 0.0289271289394082 | -2.1824342 | Down |
| SLC7A11 | 1.44223358974359 | 5.564168125 | 3.20038201912375 | 0.00508808015303316 | 0.0359139564284506 | -2.485392963 | Up |
| C5orf27 | -1.442032308 | 4.44043875 | -3.064986547 | 0.00682580866411297 | 0.0431772246790555 | -2.765668005 | Down |
| NIT2 | 1.44179666666667 | 8.870203125 | 4.47945818732679 | 0.000307804706170166 | 0.00561785770298203 | 0.238195006741409 | Up |
| CFL1 | 1.44052717948718 | 10.448455 | 10.2585518208244 | 7.85892255041307e-09 | 8.72228132773702e-06 | 10.5187771012181 | Up |
| KIAA2026 | 1.44006692307692 | 9.505034375 | 8.00884281199727 | 2.9067574433349e-07 | 6.13339218741287e-05 | 7.06597083859219 | Up |
| SLC38A4 | -1.439187179 | 3.94776375 | -3.768239972 | 0.00146432780849338 | 0.0154780445499116 | -1.284446162 | Down |
| GPX7 | 1.43669564102564 | 8.132651875 | 3.91877964788435 | 0.00105126615936256 | 0.0124501323050118 | -0.962252329 | Up |
| LPHN1 | 1.43584538461539 | 7.269914375 | 3.95811716424503 | 0.000964099641694021 | 0.0117310205301517 | -0.877960075 | Up |
| RNU6-1092P | -1.435340769 | 4.454455625 | -4.490895973 | 0.000300240665702713 | 0.00555334896808684 | 0.262590242783228 | Down |
| IFRD1 | -1.432590513 | 6.592896875 | -5.638090219 | 2.63327829470166e-05 | 0.00120307140762372 | 2.65556308108798 | Down |
| PSENEN | 1.43203769230769 | 9.092780625 | 3.97423828124284 | 0.00093050867382203 | 0.0114930395658559 | -0.843408572 | Up |
| RUNX3 | 1.43190358974359 | 7.105335 | 4.01198073002906 | 0.000856392530839554 | 0.0109730295306638 | -0.762505423 | Up |
| LINC00152 | 1.43094397435897 | 8.323560313 | 4.74979952500472 | 0.000171407809179893 | 0.0038748805126632 | 0.812754671421703 | Up |
| CCL3 | 1.43024641025641 | 6.447431875 | 3.46483528123473 | 0.0028537885204923 | 0.0242306918204422 | -1.930083755 | Up |
| PGAP2 | 1.42931948717949 | 7.58250875 | 3.84099427731367 | 0.00124759123402323 | 0.0139796196593171 | -1.128826042 | Up |
| NUGGC | 1.42852153846154 | 6.18421375 | 3.42179941901518 | 0.00313631045441624 | 0.0259550707842258 | -2.021035507 | Up |
| TARS | -1.428232564 | 7.891634375 | -4.748519226 | 0.000171881262855322 | 0.00387619559855965 | 0.810045028075329 | Down |
| ORAI2 | 1.42754692307692 | 7.091591875 | 4.08025217071929 | 0.000737072760448387 | 0.00990897869587803 | -0.61614051 | Up |
| PIGB | 1.42687102564102 | 7.498979375 | 3.81414533647523 | 0.00132356118263929 | 0.0145243859603995 | -1.186279112 | Up |
| ENPP5 | 1.42591435897436 | 8.23643875 | 3.01911320391171 | 0.00753681331150609 | 0.0461899836579733 | -2.859862761 | Up |
| MYD88 | 1.42522923076923 | 8.04186875 | 5.18870604867469 | 6.72022977941172e-05 | 0.00216774345278876 | 1.73346711164478 | Up |
| LOC643659 | -1.424975128 | 4.603304375 | -4.29179678 | 0.000463544882529611 | 0.00739491095100411 | -0.162867207 | Down |
| SNORD51 | 1.42472487179487 | 3.982505625 | 3.05533631863842 | 0.00696973090773912 | 0.0437381578531706 | -2.785517723 | Up |
| UBE2W | -1.424720256 | 8.101558125 | -8.72306713 | 8.6520398300723e-08 | 3.14586337579081e-05 | 8.2359273773444 | Down |
| LPIN1 | -1.424262308 | 8.176956875 | -3.495734912 | 0.0026666303429821 | 0.0231172637055125 | -1.864664425 | Down |
| SRRM1 | 1.42388051282051 | 8.68024625 | 6.6687400452116 | 3.38311848115871e-06 | 0.000319232155629013 | 4.6720997079454 | Up |
| HIST1H2BK | 1.42171820512821 | 9.264844375 | 4.5932745759691 | 0.000240398496298292 | 0.00476848319423343 | 0.480638446252793 | Up |
| GM2A | 1.42137974358975 | 7.890064375 | 6.08962697598101 | 1.05333223166406e-05 | 0.000670765418671972 | 3.55694617765781 | Up |
| TMPRSS2 | -1.420851795 | 6.84068125 | -2.998094919 | 0.00788619307098448 | 0.0476545247356586 | -2.902879736 | Down |
| AKT2 | 1.41882820512821 | 9.79412125 | 3.12003864917717 | 0.00605858323223997 | 0.0400232179118639 | -2.652096238 | Up |
| LRRC37A4P | 1.41872948717949 | 9.394669375 | 4.57585145826265 | 0.000249653003054953 | 0.00489786409276245 | 0.44357216557271 | Up |
| LOC728323 | 1.4184170940171 | 7.58429766666667 | 4.94783514676654 | 0.00011207822891741 | 0.00293209394879877 | 1.23031901796379 | Up |
| CUTC | -1.418401026 | 7.3415425 | -4.713367022 | 0.000185414397756267 | 0.00407986859025897 | 0.735601725704642 | Down |
| TTC1 | 1.41776256410256 | 6.68315875 | 5.18252708819974 | 6.80846262604578e-05 | 0.00218273505399242 | 1.7206318370352 | Up |
| RPL22P11 | -1.415893462 | 7.196136563 | -4.420881145 | 0.000349684260318628 | 0.00613249891290163 | 0.113160352597119 | Down |
| IGKV1OR2-108 | 1.41557538461539 | 5.718005 | 3.14981223813146 | 0.005679458822573 | 0.0383684483413649 | -2.590446609 | Up |
| LHFPL1 | -1.415368974 | 4.392469375 | -4.621094373 | 0.00022633869993076 | 0.00457952318265254 | 0.539784656841017 | Down |
| TSSC1 | 1.41465153846154 | 7.472714375 | 3.81457011170928 | 0.00132232394067221 | 0.0145243859603995 | -1.185370352 | Up |
| SLC36A2 | -1.413974103 | 4.158659375 | -5.823960153 | 1.80018553953554e-05 | 0.000934487582232039 | 3.02983658707802 | Down |
| VAMP7 | 1.41328025641026 | 9.044526875 | 5.94329785890524 | 1.41342169648506e-05 | 0.000809007794229821 | 3.26778106335449 | Up |
| COX6A2 | -1.413108205 | 6.30740625 | -4.799615141 | 0.000153981646173763 | 0.00362689662231295 | 0.918089343238091 | Down |
| TAPBP | 1.41238367521368 | 10.1748139583333 | 6.18053166976096 | 8.78712400828276e-06 | 0.000585147140745846 | 3.7351150562334 | Up |
| ARHGAP1 | 1.41197230769231 | 9.4355975 | 5.91814790718311 | 1.48711049665219e-05 | 0.00082887961324344 | 3.21779173061167 | Up |
| MRPS31 | 1.41154923076923 | 6.79198375 | 6.42461577238672 | 5.43066766071047e-06 | 0.000434957289237728 | 4.20780761235889 | Up |
| PGM1 | -1.411459744 | 8.028135625 | -5.241002365 | 6.01882334530668e-05 | 0.00203305385085598 | 1.84193981451778 | Down |
| TRIM14 | 1.4100558974359 | 6.99965375 | 4.80589167827891 | 0.000151918017389753 | 0.00359832645457619 | 0.931347507739406 | Up |
| TLL1 | -1.410035385 | 5.44268625 | -4.606539954 | 0.00023358682930092 | 0.00468924050862751 | 0.508847216626855 | Down |
| CDH20 | -1.409001026 | 4.13074 | -6.221652094 | 8.09832656104094e-06 | 0.000553512308381763 | 3.81533380658249 | Down |
| PILRA | 1.40722846153846 | 5.945193125 | 7.22276814533881 | 1.19101064655664e-06 | 0.000156829859544042 | 5.69364838098283 | Up |
| SUCNR1 | 1.40682435897436 | 4.580298125 | 2.98279690796151 | 0.00815033781396443 | 0.0487076726743767 | -2.934131566 | Up |
| UBE2J1 | 1.40555025641025 | 9.66994625 | 4.11976393500894 | 0.000675815267137929 | 0.00936458170700577 | -0.531434479 | Up |
| SRSF4 | -1.403875897 | 8.1554675 | -5.538803427 | 3.23219199504599e-05 | 0.00132861902695832 | 2.4538648757873 | Down |
| BMP2K | 1.40353051282051 | 7.671861875 | 4.41546752351313 | 0.000353835289466593 | 0.00617278375119602 | 0.101596985030611 | Up |
| TBC1D20 | 1.40322641025641 | 8.042408125 | 8.57852785431406 | 1.09996026897585e-07 | 3.77011382191471e-05 | 8.00493403112563 | Up |
| MAN2B2 | 1.40210743589744 | 8.345805625 | 5.29303581085231 | 5.39524857895077e-05 | 0.00186568336245706 | 1.94957774433353 | Up |
| P2RY14 | 1.40200205128205 | 7.72767 | 3.56896480368739 | 0.00227029733703689 | 0.0207994575606599 | -1.709274679 | Up |
| GNG10 | 1.40190564102564 | 9.655445 | 4.1007070697731 | 0.000704692274073038 | 0.00958352962944284 | -0.572287967 | Up |
| TECR | 1.40178256410256 | 9.546465 | 4.00194212009273 | 0.00087550613720199 | 0.0111080139029759 | -0.784025096 | Up |
| AGT | -1.401697692 | 5.335110625 | -5.940079524 | 1.42263719726434e-05 | 0.000809007794229821 | 3.26138883706618 | Down |
| PCOLCE2 | -1.400832564 | 4.804726875 | -5.790223806 | 1.92822306423593e-05 | 0.000979108822617578 | 2.9622323255098 | Down |
| PPID | -1.400504103 | 6.52122375 | -5.151707494 | 7.26660931827704e-05 | 0.00227332702524944 | 1.65655294966663 | Down |
| ITGA7 | -1.400456667 | 5.773525625 | -3.794375737 | 0.00138244380099654 | 0.0149197370465461 | -1.228566307 | Down |
| RNA5SP129 | 1.39983358974359 | 5.706098125 | 3.54406251977133 | 0.00239803229178687 | 0.0215545463265239 | -1.76216817 | Up |
| RNU6-1255P | 1.39952025641026 | 4.508876875 | 4.88981442894854 | 0.000126885689349629 | 0.00319365525018552 | 1.10831633680516 | Up |
| ZWILCH | 1.39649230769231 | 6.25464 | 3.9119076186775 | 0.0010672858284444 | 0.0125650262560517 | -0.976974616 | Up |
| RNU6-1285P | 1.3921917948718 | 3.9801125 | 3.22065281096089 | 0.0048683693020712 | 0.0348058537801759 | -2.443166878 | Up |
| GDPGP1 | 1.39177076923077 | 5.27154375 | 4.34080774739305 | 0.000416449621476377 | 0.00690472112542769 | -0.057994664 | Up |
| EGLN1 | -1.390821538 | 7.9932675 | -5.107611837 | 7.977656796058e-05 | 0.00241474346682758 | 1.56470337878803 | Down |
| MGC70870 | 1.38920282051282 | 6.489760625 | 4.89808206538999 | 0.000124659318844026 | 0.00315465227393888 | 1.12571880896556 | Up |
| KCNAB2 | 1.38788538461538 | 6.974696875 | 2.98193083974447 | 0.00816554626837045 | 0.0487684988272352 | -2.935899352 | Up |
| NUP43 | 1.38587846153846 | 8.09011625 | 8.3650290740024 | 1.5755924471664e-07 | 4.64124187062095e-05 | 7.65841450847102 | Up |
| NFIA | 1.38568230769231 | 9.535576875 | 4.06254144083721 | 0.000766317314895353 | 0.0102002042594323 | -0.654110724 | Up |
| ST6GALNAC2 | 1.38430256410256 | 8.8065625 | 3.49214330977574 | 0.00268774384574542 | 0.023244247054838 | -1.872273163 | Up |
| HSP90AA4P | -1.383800256 | 4.051445625 | -6.489602528 | 4.78405603929385e-06 | 0.000405461796755715 | 4.3322394062732 | Down |
| SMTNL2 | -1.382427692 | 5.8462675 | -5.957806717 | 1.3726350233944e-05 | 0.000801926010263813 | 3.29658125424068 | Down |
| DLG2 | 1.38117230769231 | 6.0473625 | 3.49293126787078 | 0.00268309762877274 | 0.0232126787059414 | -1.870603995 | Up |
| POM121C | 1.38027891025641 | 8.664495781 | 6.24458218807083 | 7.73871633248031e-06 | 0.000535523493815623 | 3.85996417094787 | Up |
| HADHB | -1.379431538 | 9.160361875 | -5.621323276 | 2.72577275931329e-05 | 0.00120505257288657 | 2.62158644676645 | Down |
| HSH2D | 1.37927333333333 | 5.99728625 | 3.29642730459516 | 0.00412658227362666 | 0.0310052395394637 | -2.284776705 | Up |
| RSAD2 | 1.37885333333333 | 5.490825 | 4.54120781447349 | 0.000269144758667433 | 0.00517570700516655 | 0.36981814246694 | Up |
| NFIL3 | -1.378674615 | 7.175026875 | -3.50466331 | 0.00261485395944024 | 0.0228173724533282 | -1.845744513 | Down |
| PCNT | -1.377898718 | 6.533940625 | -3.658120112 | 0.00186600774839194 | 0.0182275953863248 | -1.519516023 | Down |
| ADPRHL1 | -1.37644 | 4.8958025 | -3.757977007 | 0.0014977920475609 | 0.0156894558438211 | -1.306380774 | Down |
| KIF20B | 1.37573128205128 | 4.768235 | 3.44731368325845 | 0.00296563804760421 | 0.0249441089770882 | -1.967137277 | Up |
| PRR11 | 1.37380769230769 | 5.56348875 | 3.15107159854509 | 0.00566394518437961 | 0.0382969452893344 | -2.587835582 | Up |
| PROS1 | -1.373684487 | 7.273034688 | -4.196807679 | 0.000570725387823527 | 0.0084029669071402 | -0.366307809 | Down |
| ZNF420 | -1.372926923 | 6.033256875 | -7.152924028 | 1.3554285137619e-06 | 0.000172628264318298 | 5.56734289894028 | Down |
| RNU6-968P | -1.372796154 | 4.400603125 | -3.165044364 | 0.00549457914705376 | 0.0375989888961779 | -2.558847886 | Down |
| SGCA | -1.372694103 | 5.397619375 | -3.651749292 | 0.00189235205407416 | 0.0183805509762874 | -1.533094136 | Down |
| TBCA | 1.37164358974359 | 8.13527375 | 6.51629180749006 | 4.54210220898519e-06 | 0.000392084356240066 | 4.38316709292916 | Up |
| CEP135 | 1.37137948717949 | 6.0050425 | 3.82670087794951 | 0.00128747501630273 | 0.0142823323203083 | -1.15941513 | Up |
| HOOK3 | -1.370846154 | 8.9833075 | -5.824804587 | 1.79709556026294e-05 | 0.000934487582232039 | 3.03152685286512 | Down |
| EPB41L5 | -1.370771282 | 8.582155 | -3.320558969 | 0.00391459491139117 | 0.0299139224917357 | -2.23416532 | Down |
| KIF22 | 1.37020935897436 | 7.238203438 | 5.61888913285248 | 2.73947597996601e-05 | 0.00120505257288657 | 2.61665099179472 | Up |
| DDIT4L | -1.369197692 | 4.981946875 | -5.492247496 | 3.55966746317336e-05 | 0.00141636026574222 | 2.35887674077307 | Down |
| LSG1 | 1.36900820512821 | 7.8607625 | 4.90715262991463 | 0.000122262569550242 | 0.00311088832806495 | 1.14480464516864 | Up |
| LINC00174 | 1.36824205128205 | 5.9413 | 3.71496176092963 | 0.00164656549666635 | 0.0167656190610758 | -1.398259873 | Up |
| MX2 | 1.3669617948718 | 6.620343125 | 3.32432450752082 | 0.00388249851789804 | 0.0297839052390123 | -2.226260874 | Up |
| KDELR3 | 1.36680282051282 | 6.646400625 | 3.76557453945679 | 0.00147294641977466 | 0.0155479901293877 | -1.290143343 | Up |
| TUG1 | 1.36641282051282 | 10.27708375 | 7.57561335872783 | 6.25982852717161e-07 | 9.92502200563188e-05 | 6.32079081994396 | Up |
| OGFRL1 | 1.36639333333333 | 7.55014125 | 4.25578670476603 | 0.000501550437565019 | 0.00775099491369798 | -0.239965734 | Up |
| MRPL36 | -1.365160513 | 9.44147375 | -6.430311408 | 5.3705400241521e-06 | 0.000431624746010045 | 4.21873728011978 | Down |
| HERC6 | 1.36472025641026 | 6.515941875 | 4.36125391765321 | 0.000398262371107105 | 0.00667311364729928 | -0.014268154 | Up |
| UBAP2L | 1.36447666666667 | 7.285890625 | 6.70036020737257 | 3.18384711568995e-06 | 0.000302881325409738 | 4.73160828470036 | Up |
| GPR116 | -1.363341795 | 8.290618125 | -3.91419128 | 0.00106193530609133 | 0.0125192342837989 | -0.972082329 | Down |
| MMP14 | -1.361698974 | 7.13104625 | -4.599015235 | 0.000237426265738122 | 0.00473377166174695 | 0.492847249267084 | Down |
| ALAS1 | 1.36092282051282 | 7.622933125 | 5.84891751560802 | 1.71112996916512e-05 | 0.000908457999802538 | 3.07975336070643 | Up |
| RN7SL480P | -1.358192308 | 6.69485875 | -3.21871289 | 0.00488898619379694 | 0.0348814741065385 | -2.447210693 | Down |
| AMOTL1 | -1.357102564 | 7.3338175 | -3.815629815 | 0.00131924238919141 | 0.0145172721269519 | -1.183103206 | Down |
| CCND1 | 1.35682102564102 | 8.64287375 | 3.45735495824846 | 0.00290101895732048 | 0.0245423044785004 | -1.945906503 | Up |
| U2AF1 | 1.35566256410256 | 9.5816525 | 9.38175733181215 | 2.99140132259132e-08 | 1.78770745193938e-05 | 9.25267858351567 | Up |
| ADRBK2 | 1.35431923076923 | 7.155904375 | 3.6730426396476 | 0.00180572265007486 | 0.0178254882699257 | -1.487701587 | Up |
| SNORD103A | 1.35388282051282 | 4.848343125 | 4.28813928084445 | 0.000467268393507011 | 0.00743387334298151 | -0.170696392 | Up |
| APEX1 | 1.35265076923077 | 9.80539875 | 5.29662597372235 | 5.35474737654678e-05 | 0.00186015102510391 | 1.95699362285838 | Up |
| RSL24D1 | -1.352487179 | 7.3908875 | -6.998414418 | 1.80857768564426e-06 | 0.000208675842174806 | 5.28538517503957 | Down |
| TMEM9B | 1.35183256410257 | 9.253760625 | 5.08050742273561 | 8.44969524079119e-05 | 0.00248657887597374 | 1.50814992770359 | Up |
| N6AMT2 | -1.351366923 | 6.437544375 | -7.435507713 | 8.06523188528566e-07 | 0.000118972379462249 | 6.07395292427537 | Down |
| DMXL2 | 1.35112 | 7.428925 | 5.67693358795399 | 2.43120454772895e-05 | 0.0011355527934653 | 2.73414113062205 | Up |
| ORMDL2 | 1.35067461538461 | 8.339083125 | 4.34562114765259 | 0.000412093721704952 | 0.0068506907074018 | -0.047699314 | Up |
| DNAJA4 | -1.349992821 | 6.9141775 | -5.584585835 | 2.94030701195988e-05 | 0.00124826476371127 | 2.54702027407749 | Down |
| RN7SL88P | -1.349796154 | 3.526380625 | -4.882538819 | 0.000128878486539488 | 0.00321967506889744 | 1.09299718019184 | Down |
| HHEX | -1.34931641 | 8.58102375 | -3.434633351 | 0.00304927950503432 | 0.0254426680221824 | -1.993932866 | Down |
| ASB11 | -1.348113846 | 3.4372975 | -5.387235587 | 4.42955590648714e-05 | 0.00164133003994429 | 2.14368412746611 | Down |
| GEN1 | 1.34663512820513 | 6.469094375 | 3.91268901159345 | 0.00106545202099552 | 0.0125543428985554 | -0.975300651 | Up |
| APOBEC3F | 1.3460341025641 | 6.642989375 | 5.14825462219898 | 7.31986817142122e-05 | 0.0022777592452779 | 1.64936782331481 | Up |
| MTURN | -1.344457436 | 6.350475 | -6.356532167 | 6.20582377157781e-06 | 0.000468087814382407 | 4.07680132026656 | Down |
| AQP7P1 | -1.343643782 | 4.997386094 | -5.453910268 | 3.85485193751845e-05 | 0.00148996739813835 | 2.28046416970885 | Down |
| FILIP1 | -1.34109359 | 6.029108125 | -3.340134111 | 0.00375054933552003 | 0.0291089088787763 | -2.193054027 | Down |
| RFWD3 | 1.34078102564103 | 7.40271125 | 3.85005620422477 | 0.00122294839007817 | 0.0138097180850543 | -1.109429222 | Up |
| OTUD6B | 1.34031948717949 | 7.02244625 | 3.62685616187926 | 0.00199888898978338 | 0.0190077950570711 | -1.586122984 | Up |
| PRRC2C | 1.33951666666666 | 9.383060625 | 6.48464121211285 | 4.83048517617436e-06 | 0.000406440859209732 | 4.32276112584972 | Up |
| RGCC | 1.33769461538461 | 8.779996875 | 4.22937537715312 | 0.000531414430490073 | 0.00801661885529587 | -0.296533713 | Up |
| TMEM223 | 1.33647794871795 | 7.937395 | 6.44226183639873 | 5.2466115508008e-06 | 0.000427562151799001 | 4.24165459265312 | Up |
| SFR1 | 1.33617435897436 | 4.395765 | 4.01365366884181 | 0.000853248270024841 | 0.0109508025492671 | -0.758919085 | Up |
| ATP2C1 | -1.334580256 | 8.118606875 | -5.96868293 | 1.34285812606409e-05 | 0.000790353392529692 | 3.31815215344383 | Down |
| SLC25A40 | 1.3342982051282 | 7.657110625 | 4.94435938788557 | 0.000112913435635391 | 0.00294041725626153 | 1.22301867523662 | Up |
| DNAJB4 | -1.334205641 | 8.51477125 | -3.047217884 | 0.00709309582438853 | 0.0442976378293203 | -2.8022027 | Down |
| MYOF | 1.33372256410257 | 8.64585625 | 3.39333964542085 | 0.00333816479827786 | 0.0270711923985602 | -2.081071622 | Up |
| PPP4R2 | -1.333554103 | 8.023360625 | -6.007042375 | 1.24305403940727e-05 | 0.000756487798279465 | 3.39410401557361 | Down |
| SYNJ2BP-COX16 | 1.33296461538462 | 9.64619375 | 3.71143521104607 | 0.0016593978134401 | 0.0168526348225785 | -1.405788215 | Up |
| EIF1AD | 1.33283384615385 | 7.0179475 | 6.14001704052364 | 9.52514283742391e-06 | 0.000617247764449133 | 3.6558489182874 | Up |
| PPAPDC1B | 1.33240641025641 | 8.192806875 | 6.1551018184443 | 9.24314362941189e-06 | 0.000605140304973885 | 3.68538851527803 | Up |
| NTN4 | -1.331822564 | 6.9839275 | -4.787751955 | 0.0001579604914054 | 0.00368527044362928 | 0.893021922713592 | Down |
| LTBP1 | -1.330849487 | 6.407458125 | -3.517325605 | 0.00254312990681387 | 0.0224008800975476 | -1.818899534 | Down |
| OBSCN | -1.330714103 | 5.737938125 | -3.737784834 | 0.00156587907407296 | 0.0161867022640726 | -1.349522148 | Down |
| ANKRD36 | 1.32957794871795 | 7.63450875 | 3.94990911681034 | 0.000981667626475761 | 0.0118625243286757 | -0.895550467 | Up |
| ACTN4 | 1.32816153846155 | 10.74023125 | 6.91774020290582 | 2.10522946678617e-06 | 0.000231321089583129 | 5.13677557170752 | Up |
| ANPEP | 1.32810256410256 | 6.50805 | 3.37446965586943 | 0.00347902627454183 | 0.027845352122509 | -2.120826662 | Up |
| MYLK3 | -1.326650256 | 5.284 | -5.835668516 | 1.75782611593949e-05 | 0.000918602091574029 | 3.05326439959648 | Down |
| P2RX7 | 1.3254882051282 | 5.6637125 | 3.08325387365859 | 0.00656126698225378 | 0.0420697247745224 | -2.728045007 | Up |
| RNU6-560P | 1.32544923076923 | 6.0013275 | 3.06465877122865 | 0.00683064916911734 | 0.0431909767185616 | -2.766342505 | Up |
| MOXD1 | 1.32465769230769 | 6.039004375 | 3.51418549280097 | 0.00256073259780892 | 0.0224964171342377 | -1.825558166 | Up |
| SEMA4A | 1.32349358974359 | 8.157531875 | 4.71411904949286 | 0.000185113803867942 | 0.00407986859025897 | 0.737195257317537 | Up |
| SRF | 1.32325025641026 | 8.5837175 | 3.26282522617021 | 0.00444070102499607 | 0.0326085125361006 | -2.355117191 | Up |
| RBM17 | -1.323249231 | 6.58834 | -6.977017907 | 1.88275711927159e-06 | 0.000213016602810014 | 5.24606364399317 | Down |
| GYPC | 1.31999615384616 | 6.701696875 | 3.37887864014672 | 0.00344559725405052 | 0.027663291491614 | -2.111541635 | Up |
| SLCO4A1 | -1.319994615 | 5.747994375 | -4.520675015 | 0.000281419956747785 | 0.00532966656961101 | 0.326073529569901 | Down |
| PTGR1 | -1.319552308 | 6.86960375 | -3.144631343 | 0.00574371921845113 | 0.0386345927343262 | -2.601185291 | Down |
| BGN | 1.31903487179487 | 9.5136825 | 4.043119423 | 0.00079973234619845 | 0.010464707242748 | -0.695749695 | Up |
| CYFIP2 | 1.31843666666667 | 8.151693125 | 3.00129219417123 | 0.00783204791545131 | 0.0474332896208407 | -2.896341928 | Up |
| RPS9 | -1.31566 | 9.39002625 | -4.643654358 | 0.000215552937248868 | 0.00445775715036324 | 0.587712614160846 | Down |
| KIAA0040 | 1.31531051282051 | 7.312843125 | 3.95394034076515 | 0.000972999642395462 | 0.0117990128331483 | -0.886911418 | Up |
| ATP5D | -1.31374359 | 8.33427 | -4.199786337 | 0.000567011141893441 | 0.0083853608401716 | -0.359925403 | Down |
| ANAPC15 | 1.31280538461538 | 8.301044375 | 3.73517644928651 | 0.00157489696232714 | 0.0162416475667959 | -1.355093604 | Up |
| AAGAB | -1.311054872 | 7.05937125 | -5.563093743 | 3.07379519419587e-05 | 0.00128619290109736 | 2.50332108023647 | Down |
| SLC46A3 | 1.31006307692308 | 7.34870625 | 5.2936592558419 | 5.38819291487472e-05 | 0.00186568336245706 | 1.95086564013905 | Up |
| PLP2 | 1.3097658974359 | 9.593428125 | 3.80295592827703 | 0.00135657299060763 | 0.0147088762726058 | -1.210215143 | Up |
| GNAO1 | 1.30967256410257 | 5.675525625 | 3.71656941721154 | 0.00164074851007435 | 0.0167283138776478 | -1.394827687 | Up |
| CYP4V2 | 1.30928410256411 | 7.85791 | 7.11075322310364 | 1.46596885458099e-06 | 0.000181741149434676 | 5.49073484431911 | Up |
| CDC42SE1 | 1.30923358974359 | 7.902355625 | 3.99614252866641 | 0.000886743459451145 | 0.0111977378647683 | -0.796457236 | Up |
| ANKRD13A | 1.30820846153846 | 9.039129375 | 5.98352437032971 | 1.30329703968469e-05 | 0.000782885157317814 | 3.34756173675283 | Up |
| DCAKD | 1.30739 | 8.969264375 | 3.33668086044438 | 0.00377898789341072 | 0.0292418535297795 | -2.200310052 | Up |
| IL1RL1 | -1.307279487 | 4.39674875 | -3.36471145 | 0.00355415612353002 | 0.0282515337346343 | -2.141368496 | Down |
| HSPE1P6 | -1.307257179 | 5.295806875 | -3.877758346 | 0.00115059829799442 | 0.0132579803245573 | -1.050117908 | Down |
| C20orf26 | -1.307062308 | 4.626611875 | -3.512048029 | 0.00257278378322688 | 0.0225682618124459 | -1.830090162 | Down |
| ZNF768 | -1.306125385 | 6.711033125 | -7.75399039 | 4.55081431222637e-07 | 8.03529008901969e-05 | 6.63090787181044 | Down |
| PTPLAD2 | 1.30590974358974 | 6.479665 | 5.06631320252511 | 8.70820531234774e-05 | 0.0025150203372353 | 1.4785049850699 | Up |
| TRAM2 | 1.30439717948718 | 8.726879375 | 5.90972287771761 | 1.51267270737857e-05 | 0.000829549712726409 | 3.20102691084189 | Up |
| POLR1C | -1.302682821 | 7.043526875 | -4.582228984 | 0.000246224204492223 | 0.00484964582657891 | 0.457141932409075 | Down |
| ENOPH1 | -1.302180256 | 7.442261875 | -4.781770317 | 0.000160006293953739 | 0.00371458514962104 | 0.880378346256061 | Down |
| OSER1 | -1.301757949 | 6.613805 | -7.015942212 | 1.750074813689e-06 | 0.000204969817500751 | 5.31754696093199 | Down |
| SIGMAR1 | 1.30162153846154 | 7.8952975 | 6.06136438165307 | 1.11464352869184e-05 | 0.00070213504657353 | 3.50132176039885 | Up |
| ARPC2 | 1.30132974358974 | 10.56972375 | 6.017934699 | 1.21613387944284e-05 | 0.000749852707094557 | 3.41563471769938 | Up |
| TMSB10 | 1.30107512820513 | 11.13990688 | 3.87769228932286 | 0.00115076561533357 | 0.0132579803245573 | -1.050259365 | Up |
| RMND5A | -1.300435641 | 7.599779375 | -4.945010869 | 0.00011275640525543 | 0.0029396124578169 | 1.22438710174702 | Down |
| DUSP13 | -1.300218205 | 5.361339375 | -5.30193247 | 5.2954543074982e-05 | 0.00184780280792122 | 1.96795219116255 | Down |
| IKBKE | 1.29983923076923 | 6.626949375 | 3.81436871543972 | 0.00132291040283684 | 0.0145243859603995 | -1.185801218 | Up |
| MMP15 | 1.29939564102564 | 7.127145625 | 3.32302808444307 | 0.00389351948012062 | 0.0298311172002536 | -2.228982476 | Up |
| DHRS7C | -1.299358205 | 4.483208125 | -6.228130424 | 7.9950098025673e-06 | 0.000549674612001286 | 3.82795044537759 | Down |
| KNOP1 | -1.299054103 | 6.089631875 | -4.348008354 | 0.000409950549827505 | 0.00682456434469076 | -0.042593635 | Down |
| CENPN | 1.29809358974359 | 6.522704375 | 3.69658137215326 | 0.00171455200924982 | 0.0172413414396313 | -1.437490067 | Up |
| CMTM3 | 1.29764307692308 | 7.111185 | 3.75109507330102 | 0.00152065875957572 | 0.0158435376439121 | -1.321086504 | Up |
| ZNF382 | 1.29639538461539 | 6.48197125 | 3.84715616571166 | 0.00123078119864847 | 0.013871285008172 | -1.115636968 | Up |
| BNIP3 | -1.295657436 | 8.718665 | -4.232868763 | 0.000527363505764804 | 0.00798238498579067 | -0.289050646 | Down |
| MCAT | -1.295124872 | 6.827024375 | -7.17756956 | 1.29487136744552e-06 | 0.0001658217964893 | 5.61199343456768 | Down |
| FGF13 | -1.294762308 | 6.267705625 | -4.634931965 | 0.000219659657316489 | 0.00449966798477154 | 0.569186033333357 | Down |
| HGSNAT | 1.29389333333333 | 8.727995 | 5.88653574825976 | 1.58539103199514e-05 | 0.000859318808900252 | 3.15483871136831 | Up |
| PARD3 | -1.293585897 | 7.369688125 | -5.002600687 | 9.97208326754391e-05 | 0.0027247285429853 | 1.34520277625201 | Down |
| PTK2B | 1.29336717948718 | 7.5524375 | 3.43986350870778 | 0.00301450137981737 | 0.0252737889187759 | -1.982882761 | Up |
| DICER1 | 1.29329897435897 | 8.92404875 | 5.0173325611363 | 9.66408123456937e-05 | 0.00267275341903651 | 1.37605947039008 | Up |
| FXYD5 | 1.29304461538462 | 8.10643875 | 3.27506839207003 | 0.00432361565992149 | 0.0319906381542191 | -2.329506514 | Up |
| MRPL24 | -1.292657436 | 7.6436125 | -6.393501243 | 5.77166674884403e-06 | 0.000449900457910728 | 4.14801875704382 | Down |
| SLC35D1 | -1.292650256 | 6.518915 | -5.142334928 | 7.41210863006218e-05 | 0.00229421003772721 | 1.63704663838588 | Down |
| ACY1 | 1.29196538461538 | 7.391641875 | 3.42209886923509 | 0.00313425206198817 | 0.0259550707842258 | -2.020403333 | Up |
| HSP90AB2P | -1.291072051 | 5.885080625 | -5.053319815 | 8.95193830599776e-05 | 0.00256302672342764 | 1.45135093826629 | Down |
| ARID1A | 1.29051435897436 | 8.45258625 | 7.20283969182195 | 1.2356932472589e-06 | 0.000160001680632573 | 5.65768296680459 | Up |
| SLC25A6P2 | 1.28971076923077 | 10.23849 | 5.91123925205274 | 1.50803867618955e-05 | 0.000828958901555419 | 3.20404501257538 | Up |
| KIAA1524 | 1.28921025641026 | 5.09081 | 3.23288063806492 | 0.00474036664286579 | 0.034216080936907 | -2.417664404 | Up |
| LSM12 | 1.28889461538462 | 9.766351875 | 4.6254498546768 | 0.000224214438570088 | 0.00456000516557857 | 0.549040260616989 | Up |
| EDNRA | 1.28869846153846 | 7.5474675 | 3.3907070789694 | 0.00335747296206762 | 0.0271804870881938 | -2.086620381 | Up |
| CCT6A | -1.288639487 | 8.44185375 | -4.998349987 | 0.000100628059566867 | 0.00273668399571174 | 1.33629571463258 | Down |
| CRISPLD1 | 1.28773230769231 | 6.4511025 | 3.87417502020919 | 0.00115970987269261 | 0.0133149546812053 | -1.057791191 | Up |
| MAPT | -1.287083846 | 4.778984375 | -4.153037231 | 0.00062822460218452 | 0.00898730932874655 | -0.460111369 | Down |
| STIP1 | -1.286952821 | 8.5070275 | -5.23850172 | 6.05058973850696e-05 | 0.00203787709588702 | 1.83675957297261 | Down |
| GPSM3 | 1.28682068376068 | 6.72458625 | 4.50843729191483 | 0.000289004956039062 | 0.00543000795729164 | 0.299990602201538 | Up |
| MASTL | 1.2868158974359 | 6.94981125 | 4.60210689011423 | 0.000235841063992751 | 0.00472229181999918 | 0.499421519003275 | Up |
| CCNK | 1.28663641025641 | 8.47788875 | 5.85779076303689 | 1.68057298034433e-05 | 0.000896318408532845 | 3.09748095981341 | Up |
| ZNF532 | 1.28659358974359 | 8.335140625 | 6.67702719264391 | 3.32967346366577e-06 | 0.000315466257795358 | 4.68770998699979 | Up |
| RHOQ | -1.286402821 | 8.716164375 | -5.149326004 | 7.3032999856937e-05 | 0.00227583063084962 | 1.65159740593951 | Down |
| SERPINA1 | 1.28552717948718 | 8.6945775 | 4.18324446727396 | 0.00058795105950318 | 0.00858069839939925 | -0.395371776 | Up |
| LPHN3 | -1.285098462 | 4.1648475 | -4.303195465 | 0.000452131836402816 | 0.00730257500668276 | -0.13846987 | Down |
| PHKA1 | -1.284986154 | 7.38541875 | -3.279714637 | 0.00427998162718394 | 0.0317990219269289 | -2.319781768 | Down |
| ZCCHC14 | 1.28472282051282 | 6.947990625 | 5.09137316919645 | 8.2571205845726e-05 | 0.00245470292684482 | 1.5308300141303 | Up |
| SARS | -1.284059231 | 9.215961875 | -6.788896113 | 2.68809696558803e-06 | 0.000272397721638957 | 4.89745871294193 | Down |
| RNU4ATAC18P | 1.28394769230769 | 5.9810175 | 3.5451722307656 | 0.00239219103119997 | 0.021536001800087 | -1.759812201 | Up |
| TRERF1 | 1.28321833333333 | 6.110871563 | 4.550947297 | 0.000263513709391544 | 0.00510957905556466 | 0.390559748695379 | Up |
| LOC102725104 | 1.28263435897436 | 5.03139375 | 4.22000257267677 | 0.000542439099382469 | 0.00813553931100849 | -0.316612169 | Up |
| SCN1B | -1.281417436 | 5.899185 | -3.543061332 | 0.00240331446503425 | 0.0215853758137007 | -1.764293649 | Down |
| ABCA2 | 1.28022615384615 | 7.59430375 | 3.90096250051532 | 0.00109330756618182 | 0.0127843082974201 | -1.000420718 | Up |
| UCN | -1.280194872 | 6.340205 | -9.484518228 | 2.54631381050303e-08 | 1.62560736560291e-05 | 9.40611209725261 | Down |
| FAM134B | -1.279574359 | 7.2051325 | -3.242339162 | 0.00464362627995537 | 0.0337267054244063 | -2.397922106 | Down |
| KCNS3 | -1.279526154 | 5.059815 | -5.091678065 | 8.25178214025274e-05 | 0.00245470292684482 | 1.53146625759231 | Down |
| LPAR5 | 1.27831102564103 | 6.652684375 | 4.44599592803022 | 0.00033106316808796 | 0.00591271207557555 | 0.166788094756633 | Up |
| TP53 | 1.27668230769231 | 8.187694375 | 5.74773495089572 | 2.10294727579479e-05 | 0.00104015008693194 | 2.8768798722185 | Up |
| CDK12 | 1.27635512820513 | 8.304661875 | 6.32328120155998 | 6.62518450316237e-06 | 0.000487107808249859 | 4.01258130634709 | Up |
| SLC19A2 | -1.275860256 | 7.469956875 | -3.082785686 | 0.00656792048349682 | 0.0421008038253191 | -2.729010062 | Down |
| IMMP2L | -1.275379231 | 5.371694375 | -6.541511056 | 4.32511354338962e-06 | 0.000387713159060699 | 4.43119581569622 | Down |
| RCC1 | -1.275142821 | 6.278313125 | -5.402538502 | 4.29030545868157e-05 | 0.00161280886008857 | 2.175122623 | Down |
| PCED1B | 1.27381717948718 | 5.883743125 | 3.05950730920003 | 0.00690716584790494 | 0.0434625578879915 | -2.776940543 | Up |
| MLLT3 | 1.27370794871795 | 8.242984375 | 4.34072067035966 | 0.000416528849802692 | 0.00690472112542769 | -0.05818092 | Up |
| EML4 | 1.27299076923077 | 9.288705 | 6.36286014444909 | 6.12917807368115e-06 | 0.000463807640789892 | 4.08900530656795 | Up |
| DDTL | 1.27234769230769 | 8.1985725 | 5.59086323529104 | 2.90245413953804e-05 | 0.00124405233514817 | 2.55977327955548 | Up |
| MAGED1 | 1.27203871794872 | 9.447788125 | 3.17991918185219 | 0.00531973067464816 | 0.0368789300517623 | -2.527953013 | Up |
| RHOF | 1.27152692307692 | 7.426525625 | 3.94728625052614 | 0.000987348933673318 | 0.0119172147059161 | -0.901171217 | Up |
| TMEM56 | -1.271174359 | 7.2674575 | -3.358198163 | 0.00360519180737939 | 0.0284808571080058 | -2.155073069 | Down |
| CELF2 | 1.27100948717948 | 7.669391875 | 3.13830575539836 | 0.00582314291016189 | 0.038977596728071 | -2.614290374 | Up |
| SIX4 | -1.269794615 | 6.694691875 | -7.913476738 | 3.43420337337705e-07 | 6.67008150194158e-05 | 6.90426839752453 | Down |
| IDH3G | 1.26833205128205 | 9.591543125 | 5.01837478738691 | 9.64266311927238e-05 | 0.00267275341903651 | 1.37824170257682 | Up |
| HLA-DRB5 | 1.2676817948718 | 7.488228125 | 3.14207555433016 | 0.00577568109426178 | 0.0387824256018321 | -2.606481096 | Up |
| LMF2 | 1.26736897435898 | 7.720230625 | 5.34063666446531 | 4.88286551801946e-05 | 0.0017401367986006 | 2.047787108 | Up |
| PPIH | -1.267080513 | 6.75093375 | -4.801026337 | 0.000153515189279157 | 0.00362143574547501 | 0.921070534297955 | Down |
| B3GALT1 | -1.266914615 | 3.584891875 | -4.486286552 | 0.000303266015274477 | 0.00556991411978112 | 0.252759761276598 | Down |
| UBE2B | -1.266180513 | 8.002995 | -5.979506282 | 1.31388734287394e-05 | 0.000787217796924499 | 3.3396024707841 | Down |
| RN7SL700P | -1.26569359 | 4.153210625 | -4.393558197 | 0.00037115127203601 | 0.00637936777090213 | 0.0547865818238868 | Down |
| COX6A1 | 1.26504128205128 | 10.05283938 | 5.459661211 | 3.80901582834122e-05 | 0.00148456073430015 | 2.29223780287618 | Up |
| MAML3 | 1.26494794871795 | 6.768896875 | 5.94063171719918 | 1.42105163240611e-05 | 0.000809007794229821 | 3.2624856953641 | Up |
| ZNF107 | 1.2647182051282 | 7.223776875 | 3.88794177670873 | 0.00112509398543993 | 0.0130370783167078 | -1.028309373 | Up |
| PEAK1 | 1.2641041025641 | 7.64969125 | 4.24772137138002 | 0.000510485753362374 | 0.00781727427964313 | -0.257238404 | Up |
| FEM1A | -1.262152821 | 6.4201675 | -6.519704693 | 4.51208954127471e-06 | 0.000391921162906017 | 4.38967209411956 | Down |
| PPP1R14A | -1.260067436 | 5.801991875 | -5.196135154 | 6.61569463873193e-05 | 0.00215351948247102 | 1.74889400632413 | Down |
| GEM | -1.260054872 | 7.05846875 | -2.975343165 | 0.00828213389859061 | 0.0491692575487074 | -2.949340628 | Down |
| NIF3L1 | 1.25940717948718 | 6.249805 | 5.63727437777214 | 2.63770321918616e-05 | 0.00120307140762372 | 2.65391066185831 | Up |
| RABGGTB | -1.259224103 | 7.32183375 | -4.947783454 | 0.000112090604040833 | 0.00293209394879877 | 1.23021045267744 | Down |
| ATP6V1F | 1.25865743589744 | 8.5751925 | 3.81667428034951 | 0.00131621217787169 | 0.0144948117036362 | -1.180868618 | Up |
| REXO4 | -1.258607692 | 5.47242125 | -4.656457833 | 0.000209665749689007 | 0.00438660648833186 | 0.614898553931086 | Down |
| TOMM70A | -1.258428462 | 7.732406875 | -6.525068515 | 4.46533497168761e-06 | 0.000391886727860917 | 4.3998922271928 | Down |
| ANO2 | -1.258337179 | 5.380454375 | -4.829993985 | 0.000144252154992621 | 0.00348764001702594 | 0.982230831035179 | Down |
| GLB1L | 1.25735743589744 | 6.56081625 | 4.753318895 | 0.000170113184365428 | 0.00385577466504896 | 0.820202488839178 | Up |
| PACS1 | 1.25734794871795 | 8.368921875 | 4.41796338053991 | 0.000351915359082522 | 0.00616235257260432 | 0.106928233380056 | Up |
| EPM2A | -1.25701 | 5.721669375 | -4.161067003 | 0.000617254956832286 | 0.00888046992524079 | -0.442900907 | Down |
| MOB3A | 1.25663153846154 | 8.666703125 | 5.16407868890222 | 7.07902633698217e-05 | 0.00223696561503502 | 1.68228635516177 | Up |
| FITM1 | -1.256454615 | 5.670430625 | -3.848450692 | 0.00122727857985179 | 0.0138451993516969 | -1.112865971 | Down |
| SPARCL1 | -1.256408718 | 10.35010125 | -3.757526576 | 0.00149927813681946 | 0.0156979674460248 | -1.307343349 | Down |
| EYA3 | 1.25496948717949 | 7.862569375 | 4.87787925314331 | 0.000130171502249154 | 0.0032309980861779 | 1.0831838890057 | Up |
| NUP210 | 1.25436974358974 | 7.63370875 | 3.03708978269775 | 0.0072499847859226 | 0.0449283157153677 | -2.822999819 | Up |
| PSMC5 | -1.253450769 | 8.13473125 | -4.270083352 | 0.000486098206439571 | 0.00760831447849809 | -0.209352098 | Down |
| RPAIN | 1.25267923076924 | 7.524681875 | 6.17811065434005 | 8.82951914622977e-06 | 0.000585224027871625 | 3.73038476178062 | Up |
| TAF7 | -1.252405128 | 7.2096375 | -4.67006738 | 0.000203587112925651 | 0.00428311526969795 | 0.643784172539188 | Down |
| IDH3B | -1.251760769 | 7.859384375 | -7.611526143 | 5.86861899674743e-07 | 9.50470126600206e-05 | 6.38359983438898 | Down |
| AP1S2 | -1.251085769 | 6.596737813 | -5.190435313 | 6.69574709182752e-05 | 0.002167469131517 | 1.73705852392669 | Down |
| BANF1P3 | -1.251033077 | 9.217235625 | -4.520831486 | 0.000281324295329296 | 0.00532966656961101 | 0.326406972777858 | Down |
| TMEM175 | 1.25075897435897 | 8.241395 | 5.3041260298444 | 5.27114133612132e-05 | 0.00184466202884354 | 1.97248125918653 | Up |
| ALS2CR12 | 1.25049717948718 | 5.284375625 | 3.69480031804559 | 0.00172128689665921 | 0.0172773616280948 | -1.44129045 | Up |
| TEX30 | 1.24895256410256 | 4.197850625 | 4.80137980336202 | 0.000153398580399744 | 0.00362143574547501 | 0.921817216718515 | Up |
| PNN | 1.2486258974359 | 8.018591875 | 4.69248571246139 | 0.000193962416639221 | 0.0041666657912392 | 0.691338767746587 | Up |
| ATMIN | 1.24779846153846 | 9.07547625 | 7.29679066587756 | 1.03922037876023e-06 | 0.000145036583040507 | 5.82672831107985 | Up |
| RNU6-475P | -1.246878974 | 3.4696675 | -3.657424713 | 0.00186886547153059 | 0.0182325858287834 | -1.520998254 | Down |
| TAB3 | 1.2456841025641 | 8.021415 | 8.19139431462755 | 2.11940837360397e-07 | 5.1236932080829e-05 | 7.37186456225043 | Up |
| NDUFA4 | -1.24459 | 7.431780625 | -3.486061708 | 0.00272387353972873 | 0.0234696194419437 | -1.885154105 | Down |
| HIVEP1 | 1.24448641025641 | 7.557031875 | 5.37526580700983 | 4.54170571568099e-05 | 0.001662744477714 | 2.11907465866055 | Up |
| TXNRD1 | -1.244005641 | 7.26381875 | -4.728507257 | 0.00017945729944035 | 0.00399867234995816 | 0.76767579854822 | Down |
| FAM129B | -1.243627179 | 8.07325625 | -4.984676338 | 0.000103604066926236 | 0.00278512109325235 | 1.30763220917829 | Down |
| MAST3 | 1.24298871794872 | 7.359325 | 4.24194345977731 | 0.000516985648386445 | 0.0078857228448579 | -0.269613296 | Up |
| PCLO | 1.24179820512821 | 5.320884375 | 3.1958388013634 | 0.00513864190308655 | 0.0361504155856439 | -2.494848071 | Up |
| GSN | -1.241449231 | 9.4871925 | -4.549085734 | 0.00026458067607811 | 0.00512174569547551 | 0.386595697210155 | Down |
| RN7SL492P | -1.2401 | 3.64007875 | -3.638049365 | 0.00195026500995068 | 0.0187288119435189 | -1.562283724 | Down |
| PAPSS2 | 1.23947641025641 | 8.27631125 | 3.0380679813615 | 0.0072346857495336 | 0.0449171072893926 | -2.820992062 | Up |
| OXCT1 | 1.23869897435897 | 7.73607625 | 5.45013667406397 | 3.88523580307157e-05 | 0.00149922501427465 | 2.27273656749697 | Up |
| IGF2BP3 | 1.23781333333333 | 3.86004 | 5.48602761208497 | 3.6059317983703e-05 | 0.00143174535646706 | 2.34616675616306 | Up |
| SLC37A1 | 1.23599692307692 | 7.0199075 | 4.69458919615908 | 0.000193083451913755 | 0.0041666657912392 | 0.695798986327866 | Up |
| USMG5 | 1.23566102564102 | 9.44616625 | 4.50087412822549 | 0.000293796085205224 | 0.00549040756306294 | 0.283866897892931 | Up |
| DNMT1 | 1.23507051282051 | 7.507488125 | 3.17711714667421 | 0.00535224546656059 | 0.0369799051907372 | -2.533775604 | Up |
| C19orf53 | 1.23506102564103 | 9.20744375 | 5.59065592476949 | 2.90369618707087e-05 | 0.00124405233514817 | 2.55935218978588 | Up |
| MSMO1 | 1.23436666666667 | 8.08368625 | 5.0443478215697 | 9.12430074247746e-05 | 0.00258396205838301 | 1.43259149415146 | Up |
| TMEM209 | 1.23332102564103 | 8.96032 | 5.58812992725223 | 2.9188740482539e-05 | 0.00124820895816064 | 2.55422095330247 | Up |
| SNORA70 | 1.23054282051282 | 10.07820938 | 4.2956203440835 | 0.000459684383678828 | 0.00737361591906568 | -0.15468296 | Up |
| C2orf15 | 1.23044512820513 | 5.1095 | 4.01625846008988 | 0.000848375698287587 | 0.0109062837286204 | -0.753335063 | Up |
| COX17 | -1.230373077 | 7.873641875 | -3.894025403 | 0.00111012881240028 | 0.0129011086139331 | -1.015279578 | Down |
| RN7SL809P | -1.229733077 | 4.090171875 | -5.057742962 | 8.86819393240585e-05 | 0.00254545561554905 | 1.46059641189771 | Down |
| C1orf21 | -1.229121538 | 7.43986875 | -3.208679513 | 0.00499699339528748 | 0.0354104363222759 | -2.468116218 | Down |
| SFRP5 | -1.227815128 | 5.707326875 | -7.133984344 | 1.40396182975298e-06 | 0.000177837708511157 | 5.53296910701082 | Down |
| RPL36 | 1.22776102564102 | 8.9090125 | 5.74175382713356 | 2.12882171242891e-05 | 0.00104367567392419 | 2.86484628285232 | Up |
| EVL | 1.22681179487179 | 7.34492125 | 3.09698261301138 | 0.00636906448453221 | 0.0412733450378213 | -2.699728471 | Up |
| POU2F1 | 1.22674923076923 | 7.99633375 | 5.81582580099148 | 1.830232993853e-05 | 0.000935465797976576 | 3.01354967314234 | Up |
| GMNN | -1.226722308 | 5.407818125 | -4.353823697 | 0.000404776787404279 | 0.0067593441804067 | -0.030156815 | Down |
| FUS | 1.22656 | 9.40093 | 4.88588055523418 | 0.000127959244198403 | 0.00321373502643554 | 1.10003392584916 | Up |
| ASAP1 | 1.22595692307692 | 8.56696 | 4.43893727083978 | 0.000336192789948936 | 0.00598140866819835 | 0.151718555747641 | Up |
| SUMF2 | 1.22534102564103 | 9.70298625 | 3.77316568874597 | 0.0014485330422262 | 0.0153668455235166 | -1.273916938 | Up |
| ACVR2B | -1.225046667 | 5.06598625 | -5.911702572 | 1.50662569618605e-05 | 0.000828958901555419 | 3.2049671162606 | Down |
| NOP16 | -1.224699744 | 5.986568125 | -4.037397207 | 0.000809854097557188 | 0.0105213319129127 | -0.708017425 | Down |
| SPEG | -1.224584615 | 5.316145 | -4.133413766 | 0.000655867255530455 | 0.00916994488581183 | -0.502174043 | Down |
| LRRC37A6P | 1.22414153846154 | 5.306155 | 3.19051145184742 | 0.00519855821633834 | 0.0363781997995507 | -2.505930876 | Up |
| DLL4 | -1.223829231 | 6.18284875 | -4.306705232 | 0.000448675196674523 | 0.00726199500617577 | -0.130958472 | Down |
| THNSL1 | 1.22375538461538 | 6.44708125 | 4.64856655194469 | 0.000213274620745266 | 0.00443068484485024 | 0.598144065970058 | Up |
| PSMB4 | -1.223201538 | 9.19824875 | -5.887801109 | 1.5813311457677e-05 | 0.000859116200802047 | 3.15736111178498 | Down |
| SPIDR | -1.222367179 | 8.40208 | -5.679513164 | 2.4183637059407e-05 | 0.0011355527934653 | 2.73935279094505 | Down |
| MPHOSPH9 | 1.22107461538462 | 7.521563125 | 4.60439178865252 | 0.000234676433235286 | 0.00470628643443977 | 0.504279880891452 | Up |
| ACOT13 | 1.22097307692308 | 8.390000625 | 4.44399234001589 | 0.000332511083106492 | 0.00593402435984917 | 0.162510862122495 | Up |
| LONRF2 | -1.220276667 | 6.788241875 | -3.248886618 | 0.00457779874561168 | 0.0333661884944314 | -2.384248123 | Down |
| HSPH1 | -1.219655385 | 8.80284 | -4.173023371 | 0.000601278044414451 | 0.00869435091168192 | -0.41727601 | Down |
| JARID2 | 1.21905282051282 | 6.97163375 | 5.12850057269534 | 7.63234525739459e-05 | 0.00234989525646097 | 1.60823816104755 | Up |
| NKIRAS1 | -1.219017692 | 6.001238125 | -5.331987909 | 4.97210575931616e-05 | 0.00176923464018903 | 2.02996179265947 | Down |
| RMRP | 1.21881538461538 | 11.5554875 | 3.61285186684396 | 0.00206142732436427 | 0.0194516949995781 | -1.615936967 | Up |
| STBD1 | -1.218652051 | 5.205671875 | -5.250744504 | 5.89668804226582e-05 | 0.00200552742490093 | 1.86211489164097 | Down |
| C1QA | 1.21841692307692 | 6.30305375 | 3.0460634550799 | 0.00711081003968711 | 0.0443818798417742 | -2.804574232 | Up |
| MACROD1 | -1.216649487 | 6.314395625 | -6.215677016 | 8.19484128777503e-06 | 0.000555224319459804 | 3.80369207634381 | Down |
| ADIPOR2 | 1.21654743589744 | 8.145858125 | 6.0253513539366 | 1.19814883125754e-05 | 0.000742692947077648 | 3.43028593555528 | Up |
| C18orf21 | 1.21648538461539 | 6.777124375 | 5.11279806262245 | 7.89045790093895e-05 | 0.00239769103386159 | 1.57551619102642 | Up |
| IFIH1 | 1.21570897435897 | 6.502006875 | 4.29023255218094 | 0.000465133656145979 | 0.00741002742569675 | -0.166215522 | Up |
| DDRGK1 | -1.215573077 | 7.449756875 | -5.409724183 | 4.22647754428276e-05 | 0.00159395650687052 | 2.18987572359317 | Down |
| JAGN1 | -1.215367949 | 7.510186875 | -5.855542517 | 1.68826169416018e-05 | 0.00089836336314592 | 3.09299023107227 | Down |
| SH3BGRL | 1.21519769230769 | 10.65275813 | 5.89270336242785 | 1.56570333136407e-05 | 0.000854610012742445 | 3.16713138768024 | Up |
| ZFAND1 | -1.213947692 | 8.1542075 | -4.139489502 | 0.000647180029409402 | 0.00911960395734277 | -0.489150342 | Down |
| PRRG4 | -1.213373846 | 6.63191375 | -3.139143303 | 0.00581256531478919 | 0.0389515410557193 | -2.612555576 | Down |
| RNA5SP69 | 1.21299435897436 | 5.34368125 | 4.93544308500506 | 0.000115085176356245 | 0.00298032245037222 | 1.20428634667669 | Up |
| SYTL4 | -1.211922308 | 5.954683125 | -3.324203754 | 0.00388352374914654 | 0.0297839052390123 | -2.226514383 | Down |
| CCDC53 | 1.21157846153846 | 7.4257075 | 5.21865005065914 | 6.30894879151616e-05 | 0.00210361472795232 | 1.7956120338611 | Up |
| ETV6 | 1.21124897435898 | 8.277083125 | 4.84935921493348 | 0.000138379525133107 | 0.00337012705567119 | 1.02307978705504 | Up |
| UBE2E1 | 1.21107564102564 | 8.154975625 | 6.45071604762662 | 5.16073079335509e-06 | 0.00042235585953139 | 4.25785491755612 | Up |
| UBL4A | -1.210566923 | 6.377744375 | -8.371281582 | 1.55897067569261e-07 | 4.64124187062095e-05 | 7.66865352726662 | Down |
| CLSTN2 | -1.210049231 | 6.005925 | -3.511361134 | 0.00257666848016137 | 0.0225938345624985 | -1.831546474 | Down |
| TPGS2 | 1.21003794871795 | 8.7921425 | 5.20296554132675 | 6.52105441560781e-05 | 0.00214177786476706 | 1.76307255638296 | Up |
| PORCN | 1.20852282051282 | 7.185208125 | 3.24891641621367 | 0.00457750126846616 | 0.0333661884944314 | -2.384185877 | Up |
| TMEM203 | -1.208457821 | 6.795194688 | -6.09228359 | 1.04775115471387e-05 | 0.000670765418671972 | 3.56216912503236 | Down |
| PLCG2 | 1.20794230769231 | 10.21536813 | 3.68178946996801 | 0.00177129317179804 | 0.0175899147656996 | -1.469047181 | Up |
| HIPK3 | -1.207241026 | 9.44305 | -5.085810875 | 8.35513397521844e-05 | 0.00247123232944691 | 1.51922127267936 | Down |
| RNU6-701P | 1.2056758974359 | 4.499795 | 3.21030052153513 | 0.00497938633008687 | 0.035328632327347 | -2.46473975 | Up |
| SYNM | -1.205172821 | 6.88541375 | -5.100257831 | 8.10299807940949e-05 | 0.00242572348951105 | 1.54936637081653 | Down |
| PRELID2 | -1.205124615 | 5.76730625 | -8.53675584 | 1.17955235984514e-07 | 3.92740383584438e-05 | 7.93763718450456 | Down |
| GTF2A1L | -1.204193333 | 4.80463625 | -4.977817142 | 0.000105130674208921 | 0.00280673610972201 | 1.29324711473713 | Down |
| MGAT4A | 1.20363051282051 | 7.881373125 | 3.95882156627936 | 0.000962606773652355 | 0.0117217743330802 | -0.876450446 | Up |
| ENTPD1 | 1.20271487179487 | 8.9056425 | 3.79019458999169 | 0.00139522895042057 | 0.0149935217939982 | -1.237507794 | Up |
| TRIM59 | 1.20247025641026 | 5.22027375 | 3.31350047836906 | 0.00397546553943263 | 0.030220539898094 | -2.248977155 | Up |
| DPH6 | 1.2022441025641 | 7.05267 | 3.7384880309588 | 0.0015634567678756 | 0.0161867022640726 | -1.348020075 | Up |
| NPL | 1.19978128205128 | 5.744995625 | 3.33318771900274 | 0.00380797128320518 | 0.0293590429036266 | -2.207648346 | Up |
| NPY6R | -1.198875128 | 3.616080625 | -3.846485393 | 0.00123260005289137 | 0.0138716607594106 | -1.117072767 | Down |
| TM6SF1 | 1.19803153846154 | 6.847440625 | 4.54207969136279 | 0.000268635724782114 | 0.00517280230669479 | 0.371675143135341 | Up |
| NAGK | 1.19721435897436 | 9.87045 | 5.77375532719997 | 1.99409852375525e-05 | 0.00100598385915938 | 2.92917766803875 | Up |
| DSC2 | 1.19693692307692 | 7.17778125 | 3.53730167723541 | 0.00243392702888842 | 0.0217680496018045 | -1.776519478 | Up |
| SNORA67 | 1.19561256410256 | 7.550191875 | 3.83839776302356 | 0.00125474336644667 | 0.0140327752599676 | -1.134383319 | Up |
| POLRMT | -1.195164359 | 7.149265625 | -6.705386039 | 3.15331305476647e-06 | 0.000301206013800992 | 4.7410534519358 | Down |
| SNORA38 | 1.19498282051282 | 5.997926875 | 3.18507770921463 | 0.00526037670514286 | 0.0366199521704793 | -2.517230314 | Up |
| CUL4A | -1.194567179 | 7.6974075 | -4.873558044 | 0.000131382458438355 | 0.00324722264986505 | 1.07408156910853 | Down |
| RNU6-118P | 1.19381384615384 | 5.11710375 | 3.73156749583435 | 0.00158745966383844 | 0.0163567296132107 | -1.362801687 | Up |
| RN7SL38P | -1.193776923 | 7.11443625 | -4.012902142 | 0.000854659314454205 | 0.0109628754221157 | -0.760530163 | Down |
| ZBTB8OS | 1.1936941025641 | 6.538253125 | 3.88021909240278 | 0.0011443827742398 | 0.0132040244154491 | -1.0448483 | Up |
| SLC25A6 | 1.19346923076923 | 11.84289375 | 8.80501804445169 | 7.5596473266524e-08 | 2.98631695325911e-05 | 8.36561741484546 | Up |
| USP11 | 1.19331461538461 | 9.013498125 | 3.83615136318734 | 0.00126096421923015 | 0.0140618627069843 | -1.139191069 | Up |
| TADA1 | -1.192363077 | 6.990915 | -6.395336364 | 5.75095250724129e-06 | 0.000449790100960647 | 4.15154889505824 | Down |
| C11orf63 | 1.19153102564103 | 6.790545625 | 4.68781126215766 | 0.000195930302964907 | 0.00419125724032132 | 0.681425987128883 | Up |
| SUSD1 | 1.19104512820513 | 6.8651875 | 4.92862263334322 | 0.000116775201681948 | 0.00300738080176924 | 1.18995248331542 | Up |
| BAG1 | -1.190707436 | 7.183426875 | -5.455591883 | 3.84139081952989e-05 | 0.00148800646418426 | 2.28390725929841 | Down |
| CXorf24 | -1.190017179 | 5.470174375 | -6.010738086 | 1.23385187444348e-05 | 0.000754787024610348 | 3.40141107070963 | Down |
| CX3CR1 | 1.18994769230769 | 5.5323425 | 3.6471843043311 | 0.00191145652831239 | 0.0184585615822154 | -1.542821855 | Up |
| LMF1 | 1.18921205128205 | 7.369768125 | 4.30632852311701 | 0.00044904491893459 | 0.00726293540986015 | -0.131764664 | Up |
| NAP1L1 | -1.187681538 | 9.67950875 | -4.120885004 | 0.000674154122259633 | 0.00936342750235597 | -0.529031244 | Down |
| SERF2 | 1.18747333333333 | 6.50431875 | 5.12391954751212 | 7.70674078811684e-05 | 0.00235723107019211 | 1.598694453 | Up |
| UBAP1 | -1.187453846 | 7.93647375 | -6.531623181 | 4.4088808174556e-06 | 0.000391132056349144 | 4.41237576592492 | Down |
| BTF3P10 | -1.186686667 | 5.11127375 | -4.78713772 | 0.00015816933420918 | 0.00368645267241336 | 0.891723720071107 | Down |
| PARL | -1.186595385 | 7.30607125 | -8.749849634 | 8.27794544137023e-08 | 3.14586337579081e-05 | 8.27841294496064 | Down |
| PSMC1 | -1.186493333 | 8.2646625 | -5.501182109 | 3.49427580255836e-05 | 0.00140415665741772 | 2.37712609471784 | Down |
| LRRCC1 | 1.18570358974359 | 7.1234075 | 3.90830511798828 | 0.00107578136715478 | 0.0126440929522322 | -0.984692019 | Up |
| RNY4P14 | 1.18440820512821 | 6.728865 | 3.14340541648568 | 0.00575902860291598 | 0.0386866304510199 | -2.603725652 | Up |
| TMEM191A | -1.184185897 | 4.432045625 | -5.197688225 | 6.59405274185036e-05 | 0.00215351948247102 | 1.75211830640479 | Down |
| UROD | 1.18404692307692 | 7.920638125 | 5.52774378321901 | 3.30706980415437e-05 | 0.00135224343728818 | 2.43132335517535 | Up |
| RN7SL304P | -1.183155385 | 5.76920625 | -2.984289863 | 0.00812418560029835 | 0.0485964469085104 | -2.93108383 | Down |
| STARD7-AS1 | -1.182224615 | 5.2485425 | -5.575640978 | 2.99512417759934e-05 | 0.00126006063551097 | 2.52883981424882 | Down |
| ZNF724P | 1.18214846153846 | 4.727005625 | 3.63273101205429 | 0.00197321964107993 | 0.0188869939115606 | -1.573611814 | Up |
| PHKG1 | -1.181089744 | 4.34327125 | -5.419821569 | 4.13842993161502e-05 | 0.00156535329898624 | 2.21059688224965 | Down |
| MAP9 | 1.18075974358974 | 5.061810625 | 4.29179151954465 | 0.000463550216648088 | 0.00739491095100411 | -0.162878468 | Up |
| SLC35B1 | 1.18071769230769 | 9.173843125 | 3.68916264729859 | 0.00174277965606224 | 0.0174214780356002 | -1.45331881 | Up |
| RNF121 | -1.180545385 | 6.354996875 | -7.459188538 | 7.72565252687753e-07 | 0.000114689034040723 | 6.11587552536459 | Down |
| ST13P4 | -1.180499231 | 7.742844375 | -6.573865682 | 4.06235591139267e-06 | 0.00037129933030129 | 4.4926796025841 | Down |
| LOC101927180 | 1.18044846153846 | 6.374784375 | 7.46916853090035 | 7.58702973463914e-07 | 0.000113353142323868 | 6.13351868897648 | Up |
| SNORA76A | 1.17999743589743 | 8.85995125 | 3.09581730451592 | 0.00638516295576257 | 0.0413156560271955 | -2.702133357 | Up |
| PNKP | 1.17964512820513 | 7.584275 | 4.08335608907653 | 0.000732064411919259 | 0.00987274161576672 | -0.609486039 | Up |
| PEX5 | -1.179419487 | 6.462695 | -4.435247402 | 0.000338906269142242 | 0.00601393280189171 | 0.143840151473333 | Down |
| GIT2 | 1.17893051282051 | 9.117684375 | 6.28895333466823 | 7.08898286006315e-06 | 0.000502197335925507 | 3.94611787935257 | Up |
| FAM213A | -1.178707949 | 7.701633125 | -3.037861095 | 0.00723791883277519 | 0.044924609414956 | -2.821416713 | Down |
| CBL | 1.17870692307692 | 7.687369375 | 3.95574418366653 | 0.000969145926288294 | 0.0117706535195421 | -0.883045638 | Up |
| QARS | 1.17804230769231 | 9.425279375 | 5.36331446242875 | 4.65659322537989e-05 | 0.00169845412056227 | 2.09448688636114 | Up |
| SLC16A13 | 1.17640666666667 | 6.43456375 | 4.16749056069223 | 0.000608618838507802 | 0.00877246708045847 | -0.429133689 | Up |
| HSPB11 | 1.17619461538462 | 7.164998125 | 3.74223557920728 | 0.00155061055039935 | 0.0161067149638416 | -1.340014661 | Up |
| EMB | 1.17579384615385 | 8.2217025 | 3.32101752146468 | 0.0039106724010095 | 0.0299115595765377 | -2.233202847 | Up |
| PBX3 | 1.17522205128205 | 9.18143125 | 3.1244794482079 | 0.00600050450364957 | 0.0397876941952296 | -2.642910898 | Up |
| LINC00266-1 | 1.17505461538462 | 6.275331875 | 4.8779141581386 | 0.000130161767152784 | 0.0032309980861779 | 1.08325740753659 | Up |
| SLC35B2 | 1.1749658974359 | 7.642203125 | 4.92719410848453 | 0.000117132371766727 | 0.00301324965647582 | 1.18694977867194 | Up |
| SEC1P | -1.174145897 | 5.114373125 | -7.323778211 | 9.89011173724622e-07 | 0.000139702323793938 | 5.8750472710486 | Down |
| TM9SF2 | 1.17392692307692 | 10.78296563 | 4.97103302536327 | 0.000106663192260734 | 0.00283143396585528 | 1.2790152712599 | Up |
| JPX | 1.17341358974359 | 6.165821875 | 3.05068265109974 | 0.00704018826934005 | 0.0440929488730265 | -2.795083494 | Up |
| TCIRG1 | 1.17333256410256 | 7.778599375 | 3.39652001124604 | 0.00331498517031403 | 0.0269206827054038 | -2.074367175 | Up |
| GUF1 | 1.17324230769231 | 7.397439375 | 6.91553431689679 | 2.11401690827676e-06 | 0.000231321089583129 | 5.13269873667187 | Up |
| OR4F29 | 1.17185102564103 | 4.568985625 | 2.96718250336723 | 0.00842880322881804 | 0.0497594014321332 | -2.965978464 | Up |
| SULT1A2 | 1.17119666666667 | 5.965260625 | 3.07613344505666 | 0.00666317114136338 | 0.0425009660075962 | -2.742717588 | Up |
| PTCH2 | 1.17087358974359 | 4.899883125 | 3.17696455885859 | 0.00535402167519787 | 0.0369799051907372 | -2.534092642 | Up |
| TTLL1 | 1.17066846153846 | 6.895858125 | 3.68395785081706 | 0.00176285967087454 | 0.0175360522189812 | -1.464421952 | Up |
| LOC441268 | -1.170424615 | 8.477 | -5.212727142 | 6.38820229913767e-05 | 0.00211191249625534 | 1.78332725619801 | Down |
| C11orf71 | 1.17021923076923 | 7.215173125 | 3.30384555884342 | 0.00406023969657936 | 0.0306252448570146 | -2.269226712 | Up |
| LOC729468 | -1.169561026 | 7.030005 | -4.876744215 | 0.000130488472907584 | 0.00323238791012441 | 1.08079316198002 | Down |
| SERTAD2 | 1.16927230769231 | 7.32994375 | 3.46507566685886 | 0.00285228343355839 | 0.0242267383330705 | -1.929575185 | Up |
| CAPZA2 | -1.169187692 | 9.271135 | -6.993662532 | 1.82478555041546e-06 | 0.000209508752825286 | 5.27665817205123 | Down |
| RASGRP3 | 1.16875589743589 | 7.2382275 | 2.98764423112014 | 0.00806572390850673 | 0.0484130381497724 | -2.924234458 | Up |
| RNA5SP382 | -1.168418718 | 8.199543125 | -3.106697004 | 0.00623639627631895 | 0.0408176602112232 | -2.679670899 | Down |
| RASSF9 | -1.168198205 | 4.287525625 | -3.510995839 | 0.00257873675675666 | 0.0226026213721912 | -1.832320932 | Down |
| GBP3 | 1.16791679487179 | 4.548199063 | 5.61966499068038 | 2.73510054123802e-05 | 0.00120505257288657 | 2.61822419594093 | Up |
| ATRAID | 1.16770769230769 | 9.9099525 | 3.92413547757649 | 0.00103894841194091 | 0.0123584778878412 | -0.950777583 | Up |
| POLR2J3 | 1.16665136752136 | 9.91532979166666 | 4.25048151397801 | 0.000507409920392246 | 0.00778551877194343 | -0.251327123 | Up |
| PRKCA | 1.16573641025641 | 6.4604175 | 3.7083016712797 | 0.00167088376541646 | 0.0169392291955465 | -1.412477005 | Up |
| LRRC8C | 1.16485102564103 | 7.104568125 | 3.78517562359991 | 0.0014107322452162 | 0.0151033240419173 | -1.248240025 | Up |
| PRRG1 | -1.16431 | 6.736318125 | -3.213289904 | 0.00494707577686101 | 0.0351627350451704 | -2.45851196 | Down |
| TTTY14 | -1.163731795 | 5.87882125 | -5.525064252 | 3.32547815859711e-05 | 0.00135738913209147 | 2.42585978264144 | Down |
| CECR2 | -1.163188462 | 5.034749375 | -3.763932828 | 0.00147828006313306 | 0.0155760729798564 | -1.29365223 | Down |
| TMEM219 | 1.16308256410256 | 6.69286125 | 5.15799901499844 | 7.17058383573719e-05 | 0.00225539537732155 | 1.6696419371988 | Up |
| WBSCR16 | -1.162648974 | 6.398814375 | -6.753422346 | 2.87634872761133e-06 | 0.000285272594869946 | 4.83114413912267 | Down |
| ACP2 | 1.16247307692308 | 8.124189375 | 6.34711206122146 | 6.3217640298893e-06 | 0.00047224793027125 | 4.0586234392161 | Up |
| PARP12 | 1.16247076923077 | 8.0512175 | 5.86049867373636 | 1.67136018662269e-05 | 0.00089550326137046 | 3.10288895914276 | Up |
| ZNF330 | -1.162414359 | 7.822795 | -5.39513103 | 4.35714026869918e-05 | 0.00162234752894825 | 2.15990796545996 | Down |
| TMED10 | 1.1623058974359 | 11.08963688 | 4.23273295340331 | 0.000527520405765895 | 0.00798238498579067 | -0.289341554 | Up |
| RIPK2 | 1.16138666666667 | 7.1441 | 6.72974313874384 | 3.00957767404946e-06 | 0.000292267611871128 | 4.78677638559891 | Up |
| HSBP1P2 | -1.160937436 | 4.925535 | -4.064388061 | 0.000763214341962371 | 0.0101753986848214 | -0.650151725 | Down |
| CCDC167 | 1.16088846153846 | 5.996451875 | 3.36824182909883 | 0.00352679209895094 | 0.0281118137654753 | -2.133938083 | Up |
| SNORA36C | 1.16068743589744 | 4.105261875 | 3.75349367242399 | 0.00151264956779315 | 0.0157927480353094 | -1.315961287 | Up |
| UNC119B | -1.159851026 | 7.309344375 | -3.990695714 | 0.000897429220820192 | 0.0112714899367195 | -0.808132864 | Down |
| IER5 | -1.159814872 | 6.79385375 | -5.296576202 | 5.3553067226358e-05 | 0.00186015102510391 | 1.95689082340574 | Down |
| PCOLCE | 1.15931743589744 | 7.83076875 | 2.99524025629928 | 0.007934843574103 | 0.0478616457509365 | -2.908715169 | Up |
| RN7SL704P | -1.158885641 | 7.17472875 | -2.979300479 | 0.00821190550859805 | 0.0489626200278575 | -2.941267364 | Down |
| TUFM | -1.158648205 | 7.941985 | -4.810125468 | 0.000150541960348691 | 0.00358588149594014 | 0.940288955491138 | Down |
| EMC6 | -1.158355128 | 6.232933125 | -4.0837066 | 0.000731501000865304 | 0.00987274161576672 | -0.608734583 | Down |
| PLXDC1 | 1.15821974358974 | 6.815666875 | 3.05060288527524 | 0.00704140196959732 | 0.0440929488730265 | -2.795247419 | Up |
| SRSF11 | 1.15809461538462 | 10.11449188 | 8.02997876482845 | 2.80174475463242e-07 | 6.13339218741287e-05 | 7.10163176077188 | Up |
| TMEM63A | 1.15698794871795 | 8.237789375 | 4.02202854695402 | 0.000837681469244735 | 0.0107985851790304 | -0.740965282 | Up |
| MYO5A | 1.15651564102564 | 7.501685625 | 3.54059185848342 | 0.00241639261655471 | 0.0216444514658112 | -1.769535868 | Up |
| WDYHV1 | -1.155974359 | 5.2849775 | -5.577538604 | 2.98340765898649e-05 | 0.00126000880409964 | 2.53269756266751 | Down |
| C9orf85 | 1.15582102564102 | 5.54914125 | 4.99969170196438 | 0.000100340789544135 | 0.00273205932465556 | 1.33910737040656 | Up |
| CD274 | 1.1556341025641 | 5.857089375 | 3.10527886592155 | 0.00625559394480627 | 0.040869570971443 | -2.682600039 | Up |
| ZSWIM1 | 1.15530307692307 | 7.65889375 | 3.07332005104586 | 0.00670385934004037 | 0.0427156580667414 | -2.748512327 | Up |
| EXOC7 | 1.15489897435897 | 8.48723875 | 6.34413285560423 | 6.35889607175925e-06 | 0.000473504123784322 | 4.05287188566346 | Up |
| DTWD2 | 1.15408051282051 | 7.39834375 | 5.23025547609914 | 6.15656737747305e-05 | 0.00207057887253628 | 1.81967224909831 | Up |
| C15orf57 | 1.15376974358974 | 7.22965125 | 4.22577061028856 | 0.000535627467198395 | 0.00805410927612452 | -0.30425564 | Up |
| TRIM33 | 1.15371692307692 | 8.515065 | 6.75001706282596 | 2.89512528009882e-06 | 0.00028591815636976 | 4.8247686758655 | Up |
| CDC20 | 1.15364461538462 | 5.96648625 | 3.20222970088823 | 0.00506765706763074 | 0.0357806371630626 | -2.481546726 | Up |
| PPP1R10 | 1.15323974358974 | 8.665240625 | 6.78202209378315 | 2.72355106680077e-06 | 0.000273021846629161 | 4.88462275036504 | Up |
| SEC22C | 1.15305743589744 | 7.6297125 | 6.88789772706841 | 2.22739484942183e-06 | 0.000240541511332214 | 5.08156152182111 | Up |
| KLHL34 | -1.152464615 | 5.8605825 | -7.497768672 | 7.20392877898977e-07 | 0.000110461821086786 | 6.1839987698181 | Down |
| AMIGO3 | 1.15219102564103 | 5.965621875 | 4.99168321922854 | 0.000102067976389499 | 0.00276703759389556 | 1.32232258923069 | Up |
| SMYD5 | 1.15183076923077 | 6.9707225 | 7.00490924154441 | 1.78666642248072e-06 | 0.000207173305018697 | 5.29730779240279 | Up |
| PPAPDC3 | -1.150065128 | 5.69631875 | -4.378521759 | 0.000383529862814629 | 0.00653908596387751 | 0.0226491876788577 | Down |
| ZNF280B | 1.14938230769231 | 6.165853125 | 3.84498674379799 | 0.00123667349457349 | 0.0138817430901631 | -1.120280598 | Up |
| FAM58A | -1.149153077 | 6.531563125 | -3.82932613 | 0.00128005510047951 | 0.0142203261329247 | -1.153797394 | Down |
| PRPF19 | 1.14850307692308 | 8.47066875 | 4.68936469274644 | 0.000195274082780623 | 0.00418318568427576 | 0.684720406122301 | Up |
| PCGF6 | 1.14843820512821 | 6.972589375 | 3.22760727644989 | 0.00479515847117448 | 0.0345153670437504 | -2.428665371 | Up |
| PGM2L1 | -1.148014359 | 6.106705 | -4.991534542 | 0.000102100327401647 | 0.00276703759389556 | 1.32201092400024 | Down |
| NUAK1 | -1.147575128 | 6.433211875 | -3.369876391 | 0.00351419312179294 | 0.0280305609478535 | -2.130497298 | Down |
| SNX16 | -1.146392308 | 5.93861625 | -4.239480548 | 0.000519781673503392 | 0.00791283570499252 | -0.274888493 | Down |
| ACSS2 | -1.145640256 | 7.468790625 | -4.464959185 | 0.000317671835813974 | 0.00575736973352744 | 0.20726136126022 | Down |
| AAR2 | 1.14495974358974 | 7.422113125 | 6.7326810652667 | 2.99270563923108e-06 | 0.000291845147839158 | 4.79228561072267 | Up |
| BAK1 | 1.14437307692308 | 6.246473125 | 3.43271147715042 | 0.00306215858262476 | 0.0255347871503525 | -1.997992605 | Up |
| SCARNA7 | -1.143972821 | 9.59458875 | -3.532454179 | 0.00245999127725255 | 0.0219254365961473 | -1.786806878 | Down |
| PSMD4 | -1.142664359 | 6.216191875 | -5.396117126 | 4.34818176221141e-05 | 0.00162234752894825 | 2.16193372984403 | Down |
| RB1CC1 | -1.142656667 | 7.542548125 | -5.594742449 | 2.87931337239904e-05 | 0.00124405233514817 | 2.56765177857352 | Down |
| TCP1 | -1.142135385 | 10.274915 | -5.480577884 | 3.64697547413841e-05 | 0.00143824124155235 | 2.33502678069565 | Down |
| RNF26 | 1.14062871794872 | 7.7797275 | 3.12865940379512 | 0.00594633478172358 | 0.0395184558761424 | -2.634261902 | Up |
| CYP7B1 | 1.14041205128205 | 7.993558125 | 3.09727242755922 | 0.0063650669219705 | 0.0412678558700433 | -2.699130332 | Up |
| FAM198B | 1.1391341025641 | 7.466483125 | 4.21503279460501 | 0.000548378169755972 | 0.00817209222654618 | -0.327259176 | Up |
| DAP | 1.13912256410256 | 9.65915375 | 3.71236178718234 | 0.00165601657789942 | 0.0168324371483218 | -1.403810262 | Up |
| NLRP3 | 1.13900358974359 | 5.54660375 | 3.20666263923614 | 0.00501898558930076 | 0.0355015165796154 | -2.472316678 | Up |
| NETO2 | 1.13786717948718 | 7.11933375 | 4.3742630119796 | 0.000387111247244681 | 0.00657609463522724 | 0.0135453581629905 | Up |
| SOWAHB | -1.137337179 | 4.335836875 | -6.468083832 | 4.98883909506138e-06 | 0.000415267402816412 | 4.29110380939494 | Down |
| CBLL1 | 1.13676538461539 | 8.906961875 | 4.48959222005873 | 0.000301093252089698 | 0.00555334896808684 | 0.259809845372858 | Up |
| HSPA6 | -1.136691282 | 6.53159 | -3.978282334 | 0.000922268291045486 | 0.01147640526396 | -0.834740635 | Down |
| PIK3C2A | 1.13588076923077 | 9.543133125 | 4.81788617319197 | 0.000148052505344479 | 0.00355371755104405 | 0.956675317993106 | Up |
| TULP4 | 1.13528179487179 | 7.800833125 | 4.67276233676296 | 0.000202404859355477 | 0.00427305258786059 | 0.649502619933618 | Up |
| PSMC3IP | -1.134585128 | 5.09130625 | -5.598525536 | 2.85692882029951e-05 | 0.00124228432863285 | 2.57533327484145 | Down |
| HIF1AN | -1.134391026 | 6.455160625 | -4.713023156 | 0.000185552010369181 | 0.00407986859025897 | 0.734873067414682 | Down |
| RN7SL107P | -1.133665897 | 3.797743125 | -4.283311357 | 0.000472229809068762 | 0.00746187129489195 | -0.181031553 | Down |
| NPTX2 | -1.133532564 | 5.396098125 | -5.654746081 | 2.54459214624436e-05 | 0.00117922368003074 | 2.68928005938965 | Down |
| SEPW1 | -1.133379487 | 8.5134825 | -5.177020308 | 6.88809710632642e-05 | 0.00220220684852057 | 1.70918952209456 | Down |
| GLRX3 | -1.132984103 | 7.40040375 | -5.483164436 | 3.62743577931115e-05 | 0.00143675827012676 | 2.34031447703403 | Down |
| DACT1 | -1.132276154 | 6.628745625 | -5.394151094 | 4.36606160020875e-05 | 0.00162296328095798 | 2.15789474330566 | Down |
| LOC654342 | 1.1320182051282 | 7.881008125 | 3.098254718 | 0.00635153590600188 | 0.0412678558700433 | -2.697102901 | Up |
| RPSAP56 | -1.132011795 | 8.36071375 | -4.073594058 | 0.000747932697622878 | 0.0100184295307451 | -0.630414863 | Down |
| UBL5 | 1.13054820512821 | 8.46506375 | 3.09592684869116 | 0.00638364793725791 | 0.0413156560271955 | -2.701907298 | Up |
| NPIPA7 | 1.13047653846154 | 9.573792188 | 3.65761047717718 | 0.00186810165219208 | 0.0182325858287834 | -1.520602304 | Up |
| FLJ38668 | -1.129577436 | 6.225555 | -6.559109294 | 4.18008089018267e-06 | 0.000380566973857373 | 4.46465658908137 | Down |
| DSN1 | 1.12926820512821 | 6.96196375 | 3.82972450725377 | 0.00127893288945173 | 0.0142203261329247 | -1.152944893 | Up |
| FYTTD1 | -1.128926667 | 7.55593375 | -4.648114057 | 0.000213483463370096 | 0.00443068484485024 | 0.597183220821929 | Down |
| SRXN1 | -1.128050256 | 6.6219925 | -4.214737444 | 0.00054873318464602 | 0.00817209222654618 | -0.327891936 | Down |
| TPD52 | 1.12802717948718 | 6.58965875 | 5.95773167338559 | 1.37284282874356e-05 | 0.000801926010263813 | 3.29643236414568 | Up |
| IQSEC1 | 1.12772666666667 | 7.78518125 | 4.76005252220446 | 0.000167663871711578 | 0.0038472968866414 | 0.834449868859978 | Up |
| PIK3R1 | 1.12693076923077 | 9.13919125 | 3.19308262777784 | 0.00516955534215028 | 0.0362727245784928 | -2.500582472 | Up |
| EFNA4 | 1.12667025641026 | 6.34624625 | 3.4443962133756 | 0.00298467870811752 | 0.0250680744685027 | -1.973303865 | Up |
| DYNC1LI2 | -1.126359744 | 8.558929375 | -4.222149665 | 0.000539893377466473 | 0.00810257240734777 | -0.312012499 | Down |
| C12orf55 | 1.1263 | 5.13416875 | 3.56519601842959 | 0.00228918584896959 | 0.0208977841436763 | -1.717283015 | Up |
| GCFC2 | 1.12591948717949 | 6.27917625 | 4.37740069200843 | 0.00038446935467383 | 0.00655031231680041 | 0.0202527754796682 | Up |
| RNA5SP337 | -1.125862821 | 4.050643125 | -5.042123363 | 9.16755797110025e-05 | 0.00258912801326509 | 1.42793920936766 | Down |
| FGA | -1.125299744 | 3.035870625 | -3.310568871 | 0.00400102021854127 | 0.0303751720630428 | -2.255127023 | Down |
| RNA5SP268 | -1.124792821 | 4.3830525 | -3.620888689 | 0.0020253033722067 | 0.0191963178918347 | -1.59882894 | Down |
| CDKN1C | -1.123778718 | 6.935233125 | -7.680969223 | 5.18266928312102e-07 | 8.69010596990659e-05 | 6.50451739821455 | Down |
| CSTF3 | 1.12373923076923 | 6.640108125 | 6.52230386944257 | 4.48937041828055e-06 | 0.000391886727860917 | 4.39462503544567 | Up |
| PAGR1 | -1.12345 | 7.178786875 | -5.357131814 | 4.71719334845573e-05 | 0.00171435304070129 | 2.08176085401313 | Down |
| NSMCE2 | -1.123158462 | 6.51669375 | -4.754943747 | 0.000169518837121269 | 0.00385085334969339 | 0.823640750906343 | Down |
| CDKN2B | -1.122132821 | 5.93271375 | -3.646907847 | 0.00191261965165188 | 0.0184585615822154 | -1.543410925 | Down |
| HES3 | -1.121711538 | 5.151099375 | -7.258342783 | 1.11537426907995e-06 | 0.000151139698194456 | 5.75770593792823 | Down |
| TRGV7 | 1.12134128205128 | 4.884913125 | 4.16881804626434 | 0.000606849360869913 | 0.00876014916552687 | -0.426288641 | Up |
| NAA30 | -1.120974615 | 7.206618125 | -6.51060092 | 4.59260821611466e-06 | 0.000393529116518325 | 4.37231647521609 | Down |
| FAM60A | 1.12001 | 6.296688125 | 3.39748461547536 | 0.00330798628225058 | 0.0268825788983313 | -2.072333488 | Up |
| PATL1 | 1.12000153846154 | 9.37801125 | 6.26093676255747 | 7.49234935569831e-06 | 0.000525976465160423 | 3.8917512919193 | Up |
| TMEM99 | -1.119804103 | 4.9657325 | -3.166868183 | 0.00547284162892229 | 0.0374942739110205 | -2.555061801 | Down |
| FAXC | -1.119707949 | 5.768280625 | -3.378987502 | 0.00344477588826421 | 0.027663291491614 | -2.111312351 | Down |
| DNAJC2 | 1.11916846153846 | 6.783844375 | 4.47415085454039 | 0.00031137995444416 | 0.00565653359176152 | 0.226872990218539 | Up |
| GJA5 | -1.119077949 | 5.5424325 | -4.431642479 | 0.000341578726328217 | 0.00604034550419708 | 0.136142528755586 | Down |
| KIAA1407 | 1.11892179487179 | 5.430040625 | 4.24586756448751 | 0.000512562158148198 | 0.00784391741297443 | -0.261208726 | Up |
| GOLGA2P9 | -1.117833077 | 5.043310625 | -3.04649108 | 0.00710424329654654 | 0.0443553706168256 | -2.803695796 | Down |
| ZRANB3 | 1.11750794871795 | 5.604341875 | 4.28617240368607 | 0.00046928326044767 | 0.0074455990137875 | -0.174906816 | Up |
| UBE2M | -1.116466154 | 7.08603125 | -5.131551491 | 7.58320686936261e-05 | 0.00234040364842333 | 1.61459300921511 | Down |
| RBP7 | -1.116378462 | 5.5637825 | -3.023744715 | 0.00746187520899978 | 0.0458309849494455 | -2.850371556 | Down |
| SLC50A1 | 1.11616307692308 | 8.1519225 | 4.21647396228383 | 0.000546649192166514 | 0.00817209222654618 | -0.324171639 | Up |
| NPIPB6 | 1.11596076923077 | 9.408690625 | 4.59852204323159 | 0.000237680142830418 | 0.00473377166174695 | 0.491798444183517 | Up |
| APPBP2 | -1.115922308 | 7.897983125 | -5.378007744 | 4.51576055297609e-05 | 0.0016600762020223 | 2.12471342704014 | Down |
| IGFBP7 | 1.11569102564102 | 11.08807563 | 3.1896125488526 | 0.00520873543888786 | 0.0363908863531653 | -2.507800469 | Up |
| HMGN1P26 | -1.115332051 | 5.099949375 | -5.18423178 | 6.78400246476549e-05 | 0.00217788905573401 | 1.72417331161312 | Down |
| DOPEY2 | 1.11528923076923 | 6.4238125 | 3.9893490022996 | 0.000900091145010094 | 0.011290394055139 | -0.811019589 | Up |
| RAB18 | -1.115187949 | 9.013103125 | -3.701190054 | 0.00169724647998951 | 0.0171393950212805 | -1.427655299 | Down |
| MED24 | 1.11420897435898 | 8.034168125 | 5.63873734641432 | 2.62977386795213e-05 | 0.00120307140762372 | 2.6568737252643 | Up |
| FBXL3 | -1.11385359 | 9.693260625 | -5.974510682 | 1.32717801660579e-05 | 0.00078888047801904 | 3.32970386644959 | Down |
| MAN2B1 | 1.11380615384615 | 8.2056175 | 3.40209104586584 | 0.00327476422758504 | 0.0266777105390859 | -2.062620224 | Up |
| SLC41A2 | 1.11345128205128 | 7.8687225 | 4.84102073564403 | 0.000140877726639206 | 0.00342024705706248 | 1.00549435100944 | Up |
| HECTD1 | -1.113059487 | 8.8638125 | -4.759278415 | 0.000167943610130949 | 0.0038472968866414 | 0.832812142437699 | Down |
| SH3BGR | -1.112920769 | 5.201791875 | -3.211852751 | 0.00496258339653054 | 0.0352308654349489 | -2.46150616 | Down |
| ANP32A | 1.11214705128205 | 8.683282813 | 4.40538346365198 | 0.00036170113909846 | 0.00625847694800876 | 0.0800543485814744 | Up |
| IVD | -1.112088974 | 8.654174375 | -3.47284562 | 0.00280405588732873 | 0.0239480141319057 | -1.913133633 | Down |
| RAD9A | 1.11172871794872 | 7.43975625 | 5.06313515950908 | 8.76718543431907e-05 | 0.00252892067967419 | 1.47186489841933 | Up |
| HMGB3P24 | -1.111564615 | 3.71912375 | -5.179842286 | 6.8471694987043e-05 | 0.00219212883937227 | 1.71505358600104 | Down |
| PPIB | 1.11109538461538 | 11.031585 | 3.61096650920578 | 0.00206999406881509 | 0.0195088361350074 | -1.619949666 | Up |
| KBTBD12 | -1.111021026 | 4.13010875 | -3.785853056 | 0.00140862968317275 | 0.0150877444971082 | -1.24679151 | Down |
| HIBADH | -1.109602308 | 8.776658125 | -3.308511766 | 0.00401904844742197 | 0.0304496865173155 | -2.259441692 | Down |
| TXN2 | 1.10946461538461 | 8.2523 | 4.26835905746532 | 0.000487936059862459 | 0.00761199849211133 | -0.213044078 | Up |
| VPS52 | 1.10943623931624 | 8.7849225 | 5.62142540899563 | 2.72519933966213e-05 | 0.00120505257288657 | 2.62179351412621 | Up |
| CREB3L2 | 1.10788615384615 | 9.7150575 | 2.99904390513317 | 0.0078700843359588 | 0.0475942022880622 | -2.900939466 | Up |
| SNORA55 | 1.10681025641026 | 6.92591 | 3.37475062956479 | 0.00347688640397332 | 0.0278377847534889 | -2.12023502 | Up |
| RN7SL426P | -1.106692564 | 5.276835625 | -4.292101964 | 0.000463235550334075 | 0.00739491095100411 | -0.162213953 | Down |
| TMEM133 | 1.10642384615385 | 7.472429375 | 4.79189287311316 | 0.000156559878082761 | 0.00365992084099791 | 0.901773097544812 | Up |
| RNA5SP378 | -1.106228205 | 4.80955625 | -6.218930735 | 8.1421377681211e-06 | 0.000554879546671341 | 3.81003217840696 | Down |
| DNM1P34 | -1.10536359 | 5.50442875 | -4.696242383 | 0.000192395495770716 | 0.0041666657912392 | 0.699304181098513 | Down |
| YWHAB | 1.10515974358974 | 10.29697563 | 4.67626685661768 | 0.000200877901552577 | 0.00424987783928014 | 0.65693815252373 | Up |
| ANXA2R | 1.10494076923077 | 4.706814375 | 4.07704268638349 | 0.000742287733026807 | 0.00995425787897342 | -0.623021326 | Up |
| RAB7A | 1.10451628205128 | 8.682582813 | 3.82480172467137 | 0.00129286953618362 | 0.0143217254181709 | -1.163478945 | Up |
| CEP70 | -1.103701282 | 7.290859375 | -3.977073698 | 0.000924723362369576 | 0.0114930395658559 | -0.83733122 | Down |
| DENND1B | 1.10356397435897 | 7.673154063 | 4.46282064939748 | 0.000319154107903052 | 0.00576755994722292 | 0.202697934537944 | Up |
| KCTD1 | 1.10320128205128 | 6.424094375 | 3.09834755005068 | 0.00635025859575286 | 0.0412678558700433 | -2.696911288 | Up |
| GIPC2 | -1.102806667 | 4.63537625 | -4.796627833 | 0.000154973844590548 | 0.00363743745807845 | 0.911778061020197 | Down |
| RBP4 | -1.102441538 | 4.81140625 | -5.680716413 | 2.41239797405074e-05 | 0.0011355527934653 | 2.74178349406923 | Down |
| ACTN3 | -1.102404359 | 4.418703125 | -6.781016345 | 2.72877895273299e-06 | 0.000273021846629161 | 4.8827441228398 | Down |
| OAS3 | 1.10140692307692 | 6.440863125 | 4.3244889360035 | 0.000431567233537944 | 0.00705862281548692 | -0.092904735 | Up |
| MAT2A | 1.10131025641025 | 11.17448125 | 3.99606125321674 | 0.000886901965004606 | 0.0111977378647683 | -0.796631458 | Up |
| CDC42 | 1.10124538461539 | 6.701651875 | 4.99088224775796 | 0.0001022423852038 | 0.00276766930539486 | 1.32064352839652 | Up |
| CMIP | 1.10115051282051 | 8.087828125 | 4.49228352650251 | 0.000299335969801372 | 0.00554257590948195 | 0.265549257956665 | Up |
| NLK | 1.10109076923077 | 8.59594625 | 5.5542156322394 | 3.1307423801022e-05 | 0.00130300379737575 | 2.48525311151896 | Up |
| MYO9B | 1.1008858974359 | 7.751953125 | 3.09452036000882 | 0.00640312667620724 | 0.0413859327349867 | -2.704809612 | Up |
| SEPP1 | 1.10003051282051 | 9.885968125 | 3.8192717133624 | 0.00130870665238558 | 0.0144354121851163 | -1.17531135 | Up |
| FLJ30064 | 1.09878076923077 | 5.312359375 | 4.13900121960418 | 0.000647873879884071 | 0.0091202766608571 | -0.490196992 | Up |
| RNA5SP514 | -1.098648718 | 4.22659125 | -5.954873813 | 1.38078079847956e-05 | 0.000804546451754076 | 3.29076168691623 | Down |
| TMEM165 | -1.098194872 | 8.93907 | -4.567497981 | 0.00025421767684182 | 0.00495820200347472 | 0.425794463485484 | Down |
| RN7SL381P | -1.096992821 | 3.68712 | -3.65229878 | 0.00189006531059487 | 0.018370205251891 | -1.531923117 | Down |
| PGA3 | 1.0968676068376 | 5.23461270833333 | 3.57535792365217 | 0.00223860966988998 | 0.0205863314101721 | -1.695687252 | Up |
| MED29 | 1.09659948717949 | 7.90435375 | 4.22833337832861 | 0.00053262880582462 | 0.00802903798947936 | -0.298765795 | Up |
| MR1 | 1.09579102564103 | 7.671256875 | 4.75663923213047 | 0.000168900909493845 | 0.00384779541712814 | 0.827228263888773 | Up |
| SLIT3 | 1.09562897435897 | 8.459451875 | 3.14348815350093 | 0.0057579941266299 | 0.0386866304510199 | -2.603554213 | Up |
| ERV3-1 | 1.0954582051282 | 8.219413125 | 5.54746728894798 | 3.17475363537964e-05 | 0.00131195005283321 | 2.47151307969937 | Up |
| CACNG6 | -1.095445641 | 5.53738375 | -5.020147894 | 9.60633662839415e-05 | 0.00267275341903651 | 1.38195403133667 | Down |
| EIF4EBP1 | -1.095323846 | 6.523589375 | -3.866766919 | 0.00117877689468157 | 0.0134741309879075 | -1.07365365 | Down |
| RYR3 | -1.095126667 | 4.08765625 | -4.043546335 | 0.000798982322252117 | 0.010464707242748 | -0.694834442 | Down |
| RAB31 | 1.09492076923077 | 9.389413125 | 4.61576261122294 | 0.000228967002425358 | 0.00461637882831125 | 0.528452786619698 | Up |
| DHRS7B | 1.09459769230769 | 7.721070625 | 4.82603161247809 | 0.000145484769447041 | 0.0035101589249505 | 0.973868886025057 | Up |
| MSTO1 | 1.0944191025641 | 7.248667188 | 4.59946807006276 | 0.000237193405748078 | 0.00473377166174695 | 0.493810219390555 | Up |
| ARRB2 | 1.09416512820513 | 7.5607725 | 2.99692437646582 | 0.00790610683348254 | 0.0477377284891134 | -2.905272737 | Up |
| PCSK7 | 1.0941 | 6.93983625 | 3.18179106390628 | 0.00529811731980673 | 0.0368057288741387 | -2.524062553 | Up |
| FAM89A | -1.093536923 | 6.35587125 | -4.760543538 | 0.000167486679816137 | 0.0038472968866414 | 0.835488655379106 | Down |
| ZNF143 | 1.09348743589744 | 6.363011875 | 3.28893095370654 | 0.00419470731950056 | 0.0313576061724514 | -2.300482765 | Up |
| FAM110B | -1.09255 | 6.196673125 | -4.610429772 | 0.000231626887522024 | 0.00465791878125609 | 0.517116852912594 | Down |
| NDUFA5 | -1.092288462 | 7.577805625 | -3.823583459 | 0.0012963419080327 | 0.0143465531104075 | -1.166085727 | Down |
| TMEM14A | 1.0918741025641 | 7.379394375 | 3.64620332382057 | 0.00191558694496865 | 0.0184719010866299 | -1.544912088 | Up |
| DUSP26 | -1.091481795 | 5.202024375 | -3.937502683 | 0.00100883355526004 | 0.0121137989038876 | -0.922136172 | Down |
| NQO1 | 1.09137051282051 | 7.711101875 | 2.98334542650027 | 0.0081407198786611 | 0.0486626720215323 | -2.933011869 | Up |
| ASB15 | -1.090717692 | 3.332491875 | -3.364668352 | 0.00355449146889005 | 0.0282515337346343 | -2.141459196 | Down |
| MRPL17 | 1.09048487179487 | 8.381175625 | 4.76898171588608 | 0.000164471257298336 | 0.0037916237327916 | 0.853337514997396 | Up |
| MUC16 | 1.09035076923077 | 5.13087 | 3.13254339939561 | 0.00589642936566252 | 0.0392988502217605 | -2.626222543 | Up |
| EPHB2 | 1.09022333333334 | 6.914733125 | 4.63697266561558 | 0.000218691767384883 | 0.00449966798477154 | 0.573520971031022 | Up |
| RP9 | -1.090124359 | 6.534540625 | -4.179380878 | 0.000592953280160867 | 0.00862669294675989 | -0.403651423 | Down |
| PTAFR | 1.08985179487179 | 6.06944125 | 4.15138065196083 | 0.000630512043738343 | 0.00900043171513211 | -0.463662064 | Up |
| BHMT2 | -1.089822821 | 6.668745625 | -3.140913935 | 0.00579026539683203 | 0.038857937303903 | -2.608887694 | Down |
| SCAF8 | 1.08947179487179 | 9.3383625 | 8.24851256123676 | 1.92163319710681e-07 | 5.03230392415376e-05 | 7.46659859272017 | Up |
| SQSTM1 | -1.087712051 | 9.508500625 | -4.577587688 | 0.000248714761205563 | 0.00488768544638959 | 0.447266662510166 | Down |
| CCND3 | 1.08657512820513 | 7.867905625 | 4.04094257923461 | 0.00080356777317916 | 0.0104864244621986 | -0.700416593 | Up |
| HYPK | -1.085213077 | 5.954514375 | -4.596720951 | 0.000238609625525523 | 0.0047410695158767 | 0.487968177394754 | Down |
| LSM10 | -1.084806923 | 7.368154375 | -5.503340069 | 3.47866783759157e-05 | 0.00140029898602326 | 2.38153240444542 | Down |
| PDGFC | -1.084523077 | 7.123255 | -4.473521985 | 0.000311806371129088 | 0.00565986845163992 | 0.225531344302557 | Down |
| USP53 | -1.084172564 | 8.176123125 | -2.966416434 | 0.00844270035262469 | 0.0498162068654743 | -2.967539577 | Down |
| FLOT1 | -1.083891795 | 8.76493125 | -4.88151036 | 0.000129162748934617 | 0.00321967506889744 | 1.09083134728957 | Down |
| MRPL1 | -1.083176154 | 6.972649375 | -5.58025646 | 2.96670885641192e-05 | 0.00125718333302532 | 2.53822201969069 | Down |
| HIGD2A | 1.08313487179487 | 9.24919375 | 4.26782460635898 | 0.000488507133691291 | 0.0076127698931016 | -0.214188436 | Up |
| PINK1 | -1.082598718 | 7.529071875 | -4.266339972 | 0.000490097049120138 | 0.0076151279492287 | -0.217367351 | Down |
| WBP11 | 1.0820958974359 | 8.51780625 | 6.12520510444374 | 9.8106994819374e-06 | 0.000631651858634019 | 3.62681309562238 | Up |
| UBE4A | 1.08180435897435 | 9.411769375 | 5.97086276277542 | 1.33697081914241e-05 | 0.00078888047801904 | 3.32247353 | Up |
| ZBTB20 | 1.08160948717948 | 8.702564375 | 3.76305043632631 | 0.0014811547755904 | 0.0155781923983237 | -1.295538146 | Up |
| SKIV2L2 | -1.081481026 | 8.81448 | -5.57699826 | 2.98673909672267e-05 | 0.00126000880409964 | 2.53159912393407 | Down |
| SRSF8 | 1.08125564102564 | 8.832716875 | 3.76748041738132 | 0.00146677866196216 | 0.0154969221551913 | -1.286069691 | Up |
| SSB | 1.08118948717949 | 9.395403125 | 5.11077914967687 | 7.924286433246e-05 | 0.00240483520702688 | 1.57130725737102 | Up |
| UBE2Q2P2 | -1.080831667 | 6.006360938 | -7.02534757 | 1.71949609164187e-06 | 0.000202405532363116 | 5.3347863027431 | Down |
| BCL6 | -1.080139231 | 8.741766875 | -4.004816344 | 0.00086999018500694 | 0.0110627565307912 | -0.777863732 | Down |
| NHEJ1 | -1.079853333 | 6.5807125 | -4.711786797 | 0.000186047651865082 | 0.00408366702505045 | 0.732253131255935 | Down |
| KLHL8 | -1.079829487 | 7.660641875 | -3.619473949 | 0.00203161634940294 | 0.0192326897869758 | -1.601840841 | Down |
| RPL7AP66 | -1.07956359 | 9.87622125 | -5.492052766 | 3.56110660198626e-05 | 0.00141636026574222 | 2.35847888974828 | Down |
| PPIP5K2 | 1.07942487179487 | 8.101999375 | 5.35454591232488 | 4.74277898901055e-05 | 0.00171435304070129 | 2.0764368965064 | Up |
| TXNDC5 | 1.07883666666667 | 8.897868125 | 4.46264043371465 | 0.000319279339967726 | 0.00576755994722292 | 0.202313361783086 | Up |
| PSMA2 | 1.07879230769231 | 8.78875875 | 2.98732199243875 | 0.00807132225657658 | 0.0484341678254455 | -2.924892549 | Up |
| KLHDC2 | -1.078631538 | 9.289711875 | -5.165126299 | 7.06337110965668e-05 | 0.00223696561503502 | 1.68446477637471 | Down |
| CRY1 | -1.077945385 | 6.919619375 | -3.260592177 | 0.004462390134888 | 0.0327283495075453 | -2.359786044 | Down |
| MTHFR | 1.07785948717949 | 6.9735075 | 3.90200113951048 | 0.00109081114222983 | 0.0127756458753521 | -0.998195914 | Up |
| CXCR3 | 1.07717846153846 | 6.5675275 | 4.31922889727758 | 0.000436557513873296 | 0.00711527690618525 | -0.104159168 | Up |
| RAD1 | -1.07681359 | 7.001055625 | -7.287444881 | 1.05721979782457e-06 | 0.000145802496023061 | 5.80997054071152 | Down |
| PSMD10 | 1.07643461538462 | 8.381373125 | 3.66424631952611 | 0.00184101969110542 | 0.0180440058623187 | -1.506456803 | Up |
| RPP38 | 1.07610128205128 | 6.532425625 | 3.39783428679825 | 0.00330545277656309 | 0.0268807354722107 | -2.071596245 | Up |
| CXCL16 | 1.07558487179487 | 7.249449375 | 4.39222976221115 | 0.000372228400732794 | 0.00639316679136274 | 0.0519476780693182 | Up |
| INSR | -1.075343077 | 7.63035375 | -3.061739658 | 0.00687390582355581 | 0.0433334157783315 | -2.772348586 | Down |
| TMPPE | 1.07511846153846 | 6.41767375 | 4.42962617707673 | 0.000343082788925546 | 0.00605775042536948 | 0.131836851525077 | Up |
| HMGCS2 | -1.074924872 | 4.339196875 | -3.684794974 | 0.00175961456210208 | 0.0175225402777211 | -1.462636265 | Down |
| ANKRD36B | 1.07455777777778 | 7.83928375 | 3.69653174175452 | 0.00171473932539861 | 0.0172413414396313 | -1.43759597 | Up |
| GPR155 | 1.07375974358974 | 7.270523125 | 3.85556927140841 | 0.00120819537744228 | 0.0136895525824245 | -1.097627367 | Up |
| MAP7D1 | -1.073251026 | 7.596556875 | -6.722296253 | 3.05278734157297e-06 | 0.000295233670415109 | 4.77280630238953 | Down |
| RAD51C | 1.0728258974359 | 6.170754375 | 5.49359388112707 | 3.54973345422731e-05 | 0.00141636026574222 | 2.36162739984816 | Up |
| C8orf31 | 1.07254384615385 | 5.581031875 | 3.1097183334106 | 0.00619568760337584 | 0.0406082370562094 | -2.673429183 | Up |
| RN7SL814P | -1.072541538 | 4.48661 | -3.172193997 | 0.00540984599581377 | 0.0372379981383439 | -2.54400272 | Down |
| RN7SL254P | 1.07243743589744 | 5.68774875 | 3.02573868349526 | 0.00742983649040097 | 0.0456905538474341 | -2.846284046 | Up |
| RFC4 | 1.07137358974359 | 6.646314375 | 4.33695266344689 | 0.000419971880531135 | 0.00691263038103048 | -0.066240854 | Up |
| CCDC92 | 1.06964205128205 | 7.9620675 | 3.7337921938408 | 0.00157970375156273 | 0.016284013860094 | -1.358050206 | Up |
| CD82 | 1.06837564102564 | 8.101951875 | 2.97022884838317 | 0.00837375947410752 | 0.0495659403585516 | -2.9597693 | Up |
| RAD51B | 1.06815256410256 | 5.945890625 | 5.07322550007669 | 8.58132026664172e-05 | 0.00250618632452707 | 1.4929439140281 | Up |
| VIM | 1.06805384615385 | 11.57179375 | 5.64200344592547 | 2.61215987784956e-05 | 0.00120082071544457 | 2.66348784963221 | Up |
| ATP5H | -1.067856923 | 9.71296625 | -4.646971382 | 0.000214011775418802 | 0.0044337532886098 | 0.594756761306704 | Down |
| SRI | 1.06783333333333 | 9.02613125 | 4.41719334586462 | 0.000352506576920396 | 0.0061634439522008 | 0.105283437613584 | Up |
| HMGCL | -1.067817179 | 7.192211875 | -3.836894115 | 0.00125890394082776 | 0.0140456075389529 | -1.137601449 | Down |
| FLJ27255 | -1.067604872 | 4.028534375 | -5.226085661 | 6.21087879970118e-05 | 0.00207984126702062 | 1.81102908294182 | Down |
| GATA3 | 1.06730153846154 | 6.2018525 | 4.24226866127565 | 0.000516617600176514 | 0.00788526942194762 | -0.268916772 | Up |
| FBN1 | -1.067097436 | 8.86481 | -3.875488405 | 0.00115636187181559 | 0.0132961648477582 | -1.054978769 | Down |
| USP44 | -1.066983846 | 5.032255625 | -4.699141037 | 0.00019119526953204 | 0.0041571896870908 | 0.705449639721139 | Down |
| KLHL24 | -1.066849744 | 8.77628125 | -5.164060671 | 7.07929590743996e-05 | 0.00223696561503502 | 1.68224888674544 | Down |
| RNF44 | 1.06622538461539 | 7.061928125 | 5.59308481587547 | 2.88917837540521e-05 | 0.00124405233514817 | 2.56428543047256 | Up |
| WDR12 | -1.065800769 | 6.884996875 | -4.142765948 | 0.000642543535459803 | 0.00909223980855013 | -0.482127238 | Down |
| THTPA | 1.06493 | 5.883675625 | 3.92773279706927 | 0.00103075642233289 | 0.0123072950488282 | -0.94307008 | Up |
| HIST1H4C | 1.06444256410257 | 10.81628625 | 3.04859243887217 | 0.00707205993696609 | 0.0442072104638109 | -2.799378623 | Up |
| ZFAS1 | -1.064274359 | 7.35490375 | -8.048633902 | 2.71234493498832e-07 | 6.06917267905816e-05 | 7.13305372474943 | Down |
| TRANK1 | 1.06398564102564 | 7.065775 | 3.27253260256087 | 0.00434761419407857 | 0.0321375972157911 | -2.33481272 | Up |
| ITSN2 | 1.06338615384615 | 8.59534125 | 5.95194160741391 | 1.38897451229866e-05 | 0.000806058382508027 | 3.28494235491141 | Up |
| PLCL1 | -1.06309359 | 5.973383125 | -4.978559829 | 0.000104964275137017 | 0.00280673610972201 | 1.29480488298565 | Down |
| BANF1 | -1.063082821 | 8.910991875 | -4.289151762 | 0.000466234621223443 | 0.00742249338582977 | -0.168529052 | Down |
| FOXL1 | -1.062324872 | 5.214474375 | -5.278387967 | 5.56377700562202e-05 | 0.00191260989188838 | 1.91930641699392 | Down |
| ARMCX1 | -1.061757949 | 6.495605 | -4.316137976 | 0.0004395171130083 | 0.00715850828293812 | -0.110772951 | Down |
| PSMD6 | -1.061298974 | 6.96165125 | -5.537144581 | 3.24331089797797e-05 | 0.00133084237850656 | 2.45048478932431 | Down |
| HPR | -1.060893077 | 3.865494375 | -5.083903718 | 8.38901350460211e-05 | 0.00247575871361793 | 1.51524025929888 | Down |
| JPH2 | -1.060697436 | 5.06328 | -5.744889428 | 2.11521640760785e-05 | 0.00104226953091155 | 2.87115545490174 | Down |
| NRAS | 1.06024 | 9.180455 | 7.39322984322798 | 8.71065791350106e-07 | 0.0001253205580185 | 5.99890332132008 | Up |
| ETFDH | -1.059971026 | 7.110356875 | -3.158335071 | 0.00557527526628174 | 0.0379728055614344 | -2.572770994 | Down |
| GCOM2 | -1.059884359 | 6.714460625 | -5.014533966 | 9.72183436391488e-05 | 0.00268150051502679 | 1.37019921913761 | Down |
| THG1L | -1.059131282 | 7.2147225 | -5.39966247 | 4.31612888356643e-05 | 0.0016147033048039 | 2.16921611239353 | Down |
| LOC100134091 | 1.05865935897436 | 8.809274063 | 4.04877456280281 | 0.000789854290258365 | 0.0103947678955684 | -0.683625675 | Up |
| ABCA5 | -1.058648718 | 7.03715125 | -4.222198082 | 0.000539836110542885 | 0.00810257240734777 | -0.311908778 | Down |
| TMEM259 | 1.05795102564103 | 9.352881875 | 4.15112927887724 | 0.00063085987859884 | 0.00900043171513211 | -0.464200858 | Up |
| GK | 1.05742371794872 | 7.396518438 | 4.66943678554903 | 0.000203864762467164 | 0.00428446890786492 | 0.642446038485204 | Up |
| CDC26 | -1.057235769 | 7.104325938 | -5.22463964 | 6.22982754823463e-05 | 0.00208319355332431 | 1.80803135186618 | Down |
| ZNF391 | 1.05704205128205 | 5.94642 | 3.56791608751237 | 0.00227553771741288 | 0.0208229122810138 | -1.711503223 | Up |
| RRM2B | -1.057034359 | 7.96109625 | -5.121432267 | 7.74744464824546e-05 | 0.00236347764943268 | 1.59351178931827 | Down |
| SNORD83B | 1.05696128205128 | 6.654174375 | 4.2500799556946 | 0.00050785624006711 | 0.00778724038634482 | -0.252187112 | Up |
| SLC18B1 | 1.05676717948718 | 6.78988 | 5.39509759638934 | 4.35744434342303e-05 | 0.00162234752894825 | 2.15983927893773 | Up |
| VCPIP1 | 1.05633897435897 | 8.00488875 | 5.05812298365398 | 8.86103639742724e-05 | 0.00254545561554905 | 1.46139066342449 | Up |
| TAF9B | 1.05556076923077 | 8.339203125 | 3.15666362775006 | 0.00559555847934954 | 0.0380553491328275 | -2.576238392 | Up |
| RNU6-1158P | -1.055056667 | 6.206953125 | -2.975578878 | 0.00827793453738709 | 0.049167640230092 | -2.948859848 | Down |
| FBP2 | -1.054710256 | 3.83541125 | -4.368292266 | 0.000392189445189957 | 0.00661481145458202 | 0.00078066010486566 | Down |
| DUS2 | 1.05453564102564 | 6.486976875 | 3.08051135879887 | 0.00660033515757298 | 0.0422272883660592 | -2.733697447 | Up |
| DOPEY1 | 1.0541 | 7.31392625 | 6.24428772797146 | 7.74322810382567e-06 | 0.000535523493815623 | 3.85939150892052 | Up |
| RNA5SP208 | -1.054010769 | 4.23095625 | -6.439365576 | 5.27637195067373e-06 | 0.000428489202279974 | 4.23610230805916 | Down |
| SDF2 | -1.053858205 | 7.456996875 | -3.337406551 | 0.00377299402309816 | 0.0292284478093965 | -2.198785346 | Down |
| ENDOD1 | -1.052933077 | 7.372471875 | -3.783279652 | 0.0014166335150296 | 0.0151462249182836 | -1.252293972 | Down |
| KIAA0368 | -1.052776154 | 9.162889375 | -4.455505501 | 0.000324277671228272 | 0.0058249573539454 | 0.187086477879098 | Down |
| MAPK1IP1L | 1.05259282051282 | 9.449445 | 6.03994190654231 | 1.16356452372262e-05 | 0.000727056256150215 | 3.45908707085668 | Up |
| IQGAP2 | 1.05245153846154 | 9.099466875 | 3.38445115944645 | 0.00340379980950753 | 0.0273559869517904 | -2.099802982 | Up |
| PPP2R4 | -1.052358462 | 7.90082875 | -4.286244266 | 0.000469209490847573 | 0.0074455990137875 | -0.174752982 | Down |
| AP1S3 | 1.05214358974359 | 7.09102 | 3.3208951326059 | 0.00391171895092835 | 0.0299115595765377 | -2.233459737 | Up |
| COTL1 | 1.05194948717949 | 8.171305625 | 3.36247991134089 | 0.00357156081216474 | 0.0283330047137929 | -2.14606445 | Up |
| ARHGAP10 | -1.051793077 | 6.372378125 | -5.044372209 | 9.12382765867903e-05 | 0.00258396205838301 | 1.43264249600024 | Down |
| CCT7 | -1.05177641 | 9.454565 | -4.726725599 | 0.000180148071470789 | 0.00401023027867209 | 0.763902268965377 | Down |
| NCSTN | 1.05140769230769 | 8.83257875 | 4.82918083243721 | 0.000144504238733659 | 0.00349011429239936 | 0.980514906896198 | Up |
| BRCC3 | 1.05116923076923 | 7.534885 | 3.22799116267495 | 0.00479114887347877 | 0.0344971599611275 | -2.427864674 | Up |
| PDHA2 | -1.050531795 | 4.57178625 | -4.291340823 | 0.000464007427527558 | 0.00739714166442189 | -0.163843202 | Down |
| SYNRG | 1.05023128205128 | 8.62866625 | 4.28457872427416 | 0.000470922265444937 | 0.00745637584288392 | -0.178318429 | Up |
| ABTB1 | -1.049572821 | 6.48304875 | -4.799384837 | 0.000154057907756889 | 0.00362689662231295 | 0.91760280604539 | Down |
| TMED2 | 1.04924615384616 | 11.2232125 | 4.30747958237891 | 0.00044791617393386 | 0.00725979295262621 | -0.129301303 | Up |
| VAMP4 | 1.04918948717948 | 7.872663125 | 4.49218602084385 | 0.00029939945381378 | 0.00554257590948195 | 0.265341326223165 | Up |
| DUSP7 | 1.04867717948718 | 8.295406875 | 4.98004318156282 | 0.000104632734995248 | 0.00280387249217961 | 1.29791603091469 | Up |
| MFGE8 | -1.048164103 | 8.73298 | -3.779634447 | 0.00142804875804911 | 0.0152257696266471 | -1.260087682 | Down |
| ATP2A2 | -1.047617179 | 9.951244375 | -3.528232756 | 0.00248291479129489 | 0.0220467068493494 | -1.795763941 | Down |
| PDIA6 | -1.047122564 | 10.73194625 | -3.170150064 | 0.00543393791151288 | 0.0373152707025824 | -2.548247513 | Down |
| HSP90AA1 | -1.047046154 | 10.326475 | -4.746931055 | 0.000172470419300038 | 0.00387619559855965 | 0.80668363311559 | Down |
| ZNF814 | 1.04682846153846 | 6.077178125 | 3.05328197442959 | 0.0070007488991508 | 0.0438855445380602 | -2.789741016 | Up |
| PGAM2 | -1.045727179 | 6.15818 | -5.217371048 | 6.32597718154733e-05 | 0.00210627928814748 | 1.79295955207692 | Down |
| FEZ2 | -1.045698974 | 7.07721625 | -5.628242649 | 2.68720352097439e-05 | 0.00120505257288657 | 2.63561212446749 | Down |
| MPV17 | 1.04546051282051 | 10.00564 | 4.43347586681273 | 0.000340216911523092 | 0.00602654235809403 | 0.140057449794099 | Up |
| ZDBF2 | -1.045315128 | 6.421698125 | -3.430119361 | 0.00307961444388923 | 0.0256528140971144 | -2.003467523 | Down |
| SEPT3 | 1.04486641025641 | 5.177620625 | 3.31334094499863 | 0.00397685203729062 | 0.030221222834409 | -2.249311851 | Up |
| CAB39L | -1.044656923 | 6.33806625 | -3.275786179 | 0.00431684626873223 | 0.0319709996775793 | -2.32800436 | Down |
| TMCO1 | 1.04251820512821 | 9.110139375 | 4.64978403882666 | 0.000212713738489804 | 0.00443049070865224 | 0.600729257319259 | Up |
| BYSL | -1.042098718 | 5.992128125 | -3.371747775 | 0.00349982330804414 | 0.027954208992661 | -2.126557602 | Down |
| ARHGEF9 | 1.04203051282051 | 7.819903125 | 4.13344277285178 | 0.000655825503194274 | 0.00916994488581183 | -0.502111865 | Up |
| POLR2K | 1.04184358974359 | 9.49812125 | 5.16936596813393 | 7.0003758216452e-05 | 0.00223163355552159 | 1.69327968394222 | Up |
| UCK2 | -1.041799231 | 7.111238125 | -5.818499452 | 1.82030017734305e-05 | 0.000934487582232039 | 3.01890391047038 | Down |
| SERF1B | 1.04115820512821 | 6.603714375 | 3.33096840934725 | 0.00382649914470128 | 0.0294531755500505 | -2.212309796 | Up |
| MSH5 | 1.0409682051282 | 5.50471 | 3.49684347104211 | 0.00266014686608344 | 0.0230826667936734 | -1.862315716 | Up |
| RN7SL632P | -1.040289487 | 4.743668125 | -5.099384939 | 8.11800884634924e-05 | 0.00242572348951105 | 1.54754557245943 | Down |
| RIMKLB | 1.0401482051282 | 6.67302375 | 3.33689198043864 | 0.0037772431703344 | 0.0292381954735915 | -2.199866487 | Up |
| ATF7IP | 1.04013717948718 | 9.917178125 | 5.19326271078568 | 6.65591386828181e-05 | 0.00216057638618446 | 1.74292992029881 | Up |
| EXT1 | 1.03997461538462 | 8.334819375 | 3.6692783608215 | 0.00182074426667135 | 0.0178854250872767 | -1.495728243 | Up |
| ALDH1L1 | -1.039309231 | 5.06509125 | -4.07788668 | 0.000740912769576159 | 0.00994726608324398 | -0.621211886 | Down |
| RASGRF2 | 1.03922205128205 | 6.73693125 | 3.38646507470611 | 0.00338881769521982 | 0.0273293401294747 | -2.095559718 | Up |
| NDUFA13 | -1.039200256 | 7.104183125 | -4.975384443 | 0.000105677611111109 | 0.00281488923676184 | 1.28814423391715 | Down |
| MAGI3 | 1.03918128205129 | 7.926228125 | 2.9683162613888 | 0.0084082766812866 | 0.0496759707505062 | -2.963667834 | Up |
| PHLDA1 | 1.03913487179487 | 8.25969375 | 3.35297147342986 | 0.00364666865294788 | 0.0286653984129026 | -2.166066743 | Up |
| RNA5SP211 | 1.03864564102564 | 4.37572625 | 3.95234128821928 | 0.000976428709903631 | 0.011820856386622 | -0.890338272 | Up |
| ABHD17AP4 | -1.038464103 | 8.29963125 | -5.250243027 | 5.90291248758759e-05 | 0.00200552742490093 | 1.86107662720437 | Down |
| NGRN | -1.037948333 | 7.184610313 | -4.100940762 | 0.000704330734805302 | 0.00958352962944284 | -0.571786972 | Down |
| CSNK1A1L | -1.037869744 | 5.0006175 | -7.684072054 | 5.15404211180038e-07 | 8.69010596990659e-05 | 6.50990379167263 | Down |
| RNY4P19 | 1.03764538461538 | 5.511026875 | 4.64006547738274 | 0.000217233131099012 | 0.00448852179656444 | 0.580090335613588 | Up |
| RPS28 | 1.03709658119662 | 12.1154854166667 | 3.97954273552422 | 0.000919715044396318 | 0.0114636582893626 | -0.832039076 | Up |
| SSTR5-AS1 | -1.036954872 | 6.5386575 | -3.60670346 | 0.00208949546546817 | 0.0196212211175127 | -1.629021965 | Down |
| HTATSF1 | 1.03654615384615 | 6.58155375 | 4.13463250868961 | 0.000654115294149715 | 0.00916994488581183 | -0.499561568 | Up |
| SLC24A1 | 1.03636615384615 | 5.8395475 | 3.79908307725058 | 0.00136818981875007 | 0.0147974014411173 | -1.218498693 | Up |
| ATP5A1 | -1.035831795 | 9.73072 | -3.689426734 | 0.0017417669182361 | 0.0174214780356002 | -1.452755405 | Down |
| NUDT5 | 1.03556205128205 | 7.6301575 | 3.76894580513947 | 0.00146205396659929 | 0.0154610216876269 | -1.282937438 | Up |
| SHISA5 | 1.03556128205128 | 10.12264688 | 5.58616916203438 | 2.93071187431116e-05 | 0.00124826476371127 | 2.55023737480444 | Up |
| FBXO34 | -1.035045128 | 8.3893825 | -4.723769066 | 0.000181300338960807 | 0.00402818589147715 | 0.757639868133777 | Down |
| MPZL3 | 1.03451461538462 | 6.839523125 | 3.32496445042673 | 0.00387706966950421 | 0.0297539884053785 | -2.224917351 | Up |
| GPC4 | -1.034477692 | 6.390836875 | -3.835081797 | 0.0012639369630043 | 0.0140865457467619 | -1.141480098 | Down |
| NUS1 | 1.03398794871795 | 9.489071875 | 4.11767971529402 | 0.000678914532240905 | 0.0093907780432871 | -0.535902445 | Up |
| RPL22 | -1.033015897 | 5.04162125 | -3.940920656 | 0.00100127489783952 | 0.0120416481134911 | -0.914812076 | Down |
| FDXACB1 | 1.03298846153846 | 4.860133125 | 6.84804071552533 | 2.40213851683759e-06 | 0.000249940367910418 | 5.0076157127382 | Up |
| LRRC37A2 | 1.03294378205129 | 8.532362656 | 4.53769911097351 | 0.000271203193316793 | 0.0052024138490819 | 0.362344569591631 | Up |
| C2CD5 | 1.03286333333333 | 7.959768125 | 5.00908903628742 | 9.83521188273848e-05 | 0.00269681509824689 | 1.35879545599295 | Up |
| ADAMTSL4 | -1.031994103 | 5.770958125 | -3.692609233 | 0.00172960848527362 | 0.0173384881575364 | -1.4459655 | Down |
| C2orf88 | -1.031697949 | 5.78243875 | -5.041641854 | 9.17694904994224e-05 | 0.00258912801326509 | 1.42693211017994 | Down |
| UTP6 | -1.030702051 | 7.26883125 | -5.617882483 | 2.74516370715096e-05 | 0.00120505257288657 | 2.61460969997043 | Down |
| NPIPB9 | 1.02957153846154 | 9.070511875 | 4.24494365096872 | 0.0005136001958438 | 0.00785007707197704 | -0.263187514 | Up |
| OLAH | -1.027494872 | 3.16626375 | -4.988378653 | 0.000102789501332625 | 0.00277603117909559 | 1.31539491194917 | Down |
| MKRN1 | -1.026880256 | 8.896093125 | -5.567313402 | 3.04710348273816e-05 | 0.00127886304630393 | 2.51190521559091 | Down |
| KLHL21 | -1.026518974 | 5.84525 | -5.2608544 | 5.77262703287953e-05 | 0.00197856791551946 | 1.88304080220254 | Down |
| CCNH | 1.02602974358974 | 7.0890725 | 4.58196922091074 | 0.0002463629235281 | 0.00484964582657891 | 0.456589268913214 | Up |
| RNF126 | 1.02595230769231 | 7.36651625 | 4.48449613716383 | 0.000304449462033442 | 0.00557030264157471 | 0.248941069735666 | Up |
| DNAJB14 | 1.02588846153846 | 7.324734375 | 4.70008918594832 | 0.000190804332600314 | 0.00415614633636963 | 0.707459691105232 | Up |
| SLC2A14 | -1.025858205 | 6.386546875 | -4.008630131 | 0.000862725001704774 | 0.0110359668577021 | -0.769688159 | Down |
| HMGN2P20 | -1.025835641 | 5.602421875 | -3.629280922 | 0.00198825428840045 | 0.0189747343948739 | -1.580959468 | Down |
| GSTA4 | 1.02583205128205 | 6.513291875 | 3.85787509830197 | 0.00120207796311793 | 0.0136467759797319 | -1.092690992 | Up |
| ACAT1 | -1.025813333 | 7.32965 | -3.484883919 | 0.00273092601346229 | 0.023513000589496 | -1.887648272 | Down |
| LOC93622 | -1.025408205 | 6.1490225 | -7.205229948 | 1.23024318483972e-06 | 0.000160001680632573 | 5.66199980302307 | Down |
| RNU6-728P | 1.02481128205128 | 4.1392025 | 3.15204052731084 | 0.00565203751993844 | 0.0382608302286393 | -2.585826521 | Up |
| LMAN2L | -1.024692308 | 7.0167375 | -3.155604689 | 0.00560844622939112 | 0.038076334479586 | -2.57843491 | Down |
| ECHDC1 | -1.024521795 | 8.400179375 | -3.193187577 | 0.00516837488635638 | 0.0362727245784928 | -2.50036414 | Down |
| DHRS7 | -1.023859231 | 8.754474375 | -3.621367468 | 0.00202317135139742 | 0.0191917194493365 | -1.597809616 | Down |
| CCDC28A | -1.023692564 | 6.683083125 | -5.585196148 | 2.93660462727659e-05 | 0.00124826476371127 | 2.54826038101215 | Down |
| RNU6-1172P | 1.02302256410256 | 3.9856025 | 3.78814814018735 | 0.00140152963678338 | 0.0150344932609427 | -1.241883916 | Up |
| C22orf39 | -1.022871795 | 6.94185 | -6.810971073 | 2.57744420508412e-06 | 0.000262325292960243 | 4.9386330641321 | Down |
| MRGPRF | -1.02246359 | 5.270575 | -4.505848045 | 0.000290636203642113 | 0.00544084979782067 | 0.294470991454774 | Down |
| UBXN2A | -1.021416667 | 6.144885625 | -5.677909548 | 2.42633809136488e-05 | 0.0011355527934653 | 2.73611301517635 | Down |
| MYSM1 | 1.01976205128205 | 8.3707 | 4.21568468799304 | 0.000547595406373964 | 0.00817209222654618 | -0.325862564 | Up |
| EIF4E2 | 1.01969846153846 | 7.080205 | 5.47615364238201 | 3.68064884174369e-05 | 0.00144662533818753 | 2.32598045826892 | Up |
| RPL10AP6 | -1.019251026 | 9.003281875 | -4.025476655 | 0.000831355594755142 | 0.0107408009129479 | -0.733573211 | Down |
| MBD6 | 1.01906282051282 | 7.764611875 | 3.5824655681945 | 0.00220389628317547 | 0.0203722466143224 | -1.680577428 | Up |
| EMD | 1.01875717948718 | 8.593436875 | 3.42525825130263 | 0.00311261602292847 | 0.0258628244438476 | -2.013732921 | Up |
| FNBP4 | 1.01820256410256 | 8.94116625 | 4.42093683308793 | 0.000349641817316936 | 0.00613249891290163 | 0.113279295172592 | Up |
| AFG3L2 | -1.017197949 | 7.72644 | -3.956721093 | 0.000967065265885257 | 0.0117576370119915 | -0.880952022 | Down |
| KIAA0196 | 1.01701512820513 | 7.863308125 | 5.94194531884867 | 1.41728708398558e-05 | 0.000809007794229821 | 3.26509482901704 | Up |
| POLDIP3 | -1.016635641 | 8.232406875 | -5.214032936 | 6.37064243271148e-05 | 0.00211191249625534 | 1.78603593671242 | Down |
| KLK9 | -1.016562308 | 5.194913125 | -5.659339574 | 2.5206786154182e-05 | 0.00117264384210683 | 2.69857272893934 | Down |
| POLG | -1.01579359 | 6.610704375 | -4.284228453 | 0.000471283274338595 | 0.00745702598439215 | -0.17906827 | Down |
| VPS25 | 1.01527487179487 | 8.1288275 | 3.79051379496768 | 0.0013942487271092 | 0.0149935217939982 | -1.236825192 | Up |
| KCNK5 | -1.015137179 | 6.107404375 | -3.088919992 | 0.00648126455725196 | 0.0417289594021745 | -2.716362451 | Down |
| TRPS1 | 1.01513666666667 | 7.855401875 | 6.37645869707407 | 5.9677663528275e-06 | 0.000457506870122562 | 4.11521196585102 | Up |
| HCFC1 | 1.01486025641026 | 8.293740625 | 4.03150679521252 | 0.000820408002890298 | 0.0106288211914198 | -0.72064562 | Up |
| ATXN7 | 1.01462974358974 | 8.92319 | 4.3687799825466 | 0.00039177211720712 | 0.00661481145458202 | 0.00182338697584949 | Up |
| LRCH2 | -1.014117436 | 5.25891625 | -3.375762492 | 0.00346919091201023 | 0.0277952673036172 | -2.118104276 | Down |
| RPS19BP1 | -1.013704615 | 7.959055 | -5.072661927 | 8.59159425621971e-05 | 0.00250618632452707 | 1.49176685286079 | Down |
| KHDRBS3 | -1.013317692 | 6.501679375 | -3.828844361 | 0.00128141354250613 | 0.0142286352716486 | -1.154828344 | Down |
| PSME2 | 1.01264974358974 | 7.85706125 | 3.16318645661371 | 0.00551680991608273 | 0.0376626504728003 | -2.562704167 | Up |
| ATF5 | 1.01252615384615 | 6.7952075 | 4.45755283150228 | 0.000322835361395527 | 0.00581138655817211 | 0.19145599515191 | Up |
| MIR149 | -1.011847949 | 6.007106875 | -5.095224436 | 8.18994741994489e-05 | 0.00244408584528368 | 1.53886599080386 | Down |
| DAP3 | -1.011844103 | 7.4161 | -4.286636924 | 0.000468806615670778 | 0.0074455990137875 | -0.173912425 | Down |
| B3GNT1 | -1.011807179 | 5.81043 | -3.652625917 | 0.00188870520781422 | 0.018370205251891 | -1.531225943 | Down |
| STYX | 1.01118435897436 | 8.527610625 | 4.12407569596512 | 0.000669448801245916 | 0.00932626611514559 | -0.522191413 | Up |
| BRF2 | -1.010767179 | 6.394135 | -4.758545176 | 0.000168209018771459 | 0.0038472968866414 | 0.831260836237729 | Down |
| TRAPPC1 | 1.01062128205128 | 9.770673125 | 4.4893717042982 | 0.000301237700585098 | 0.00555334896808684 | 0.2593395628097 | Up |
| TNFAIP8L3 | -1.010500256 | 5.672281875 | -3.277222015 | 0.00430333630845221 | 0.0319013547522569 | -2.324999289 | Down |
| C19orf43 | -1.010476923 | 9.3394175 | -5.468675161 | 3.73829670405268e-05 | 0.00146025016542229 | 2.31068383661442 | Down |
| RHOJ | -1.01030359 | 8.012235 | -3.652329812 | 0.00188993624836626 | 0.018370205251891 | -1.531856983 | Down |
| EGFLAM | -1.009841795 | 5.242786875 | -4.323501706 | 0.00043249941441879 | 0.00706464926335068 | -0.095016955 | Down |
| ARSG | 1.00941282051282 | 6.23534125 | 4.50707505531859 | 0.000289862014885459 | 0.00543946375276602 | 0.297086706084414 | Up |
| ASNSD1 | -1.00872641 | 7.113723125 | -5.820842496 | 1.81164128249619e-05 | 0.000934487582232039 | 3.02359531148432 | Down |
| SELM | 1.00854641025641 | 9.298280625 | 3.11659902698393 | 0.00610394548342337 | 0.0401983163433145 | -2.659208338 | Up |
| NCEH1 | 1.00818307692308 | 7.16473875 | 4.10433894881192 | 0.000699094554253471 | 0.00954528223549247 | -0.564501895 | Up |
| LRIF1 | 1.00804461538462 | 6.71450625 | 5.20411596155579 | 6.50525150600441e-05 | 0.00214149571822662 | 1.76546012439547 | Up |
| PDHA1 | -1.00752641 | 8.633518125 | -3.570526909 | 0.0022625138054378 | 0.0207444568305818 | -1.705955006 | Down |
| IARS2 | -1.007100769 | 7.401390625 | -4.531696203 | 0.000274762042607833 | 0.00524908108775473 | 0.349556746777047 | Down |
| NMRK2 | -1.006711026 | 5.859200625 | -5.932199075 | 1.44546507243453e-05 | 0.000815725289182363 | 3.24573093164556 | Down |
| DVL1 | -1.006550256 | 7.41818125 | -5.202716003 | 6.52448742431293e-05 | 0.00214177786476706 | 1.7625546491515 | Down |
| PTBP1 | 1.00654487179487 | 9.806704375 | 6.98167676285555 | 1.86634057226162e-06 | 0.000212189266915618 | 5.25463118913641 | Up |
| PCK1 | -1.005693077 | 4.169954375 | -8.21289214 | 2.04258836511291e-07 | 5.06453266230708e-05 | 7.40757441648126 | Down |
| RASL10B | -1.005557436 | 5.68503125 | -7.491484119 | 7.28634903795831e-07 | 0.000110995383678232 | 6.17291661509299 | Down |
| SDHAF2 | -1.005383333 | 8.430019375 | -6.341545118 | 6.39133210534332e-06 | 0.000474403749615404 | 4.04787506863929 | Down |
| C1orf85 | 1.00534307692307 | 8.16558125 | 4.53300347095896 | 0.000273983004866625 | 0.00524021121513656 | 0.352341750173022 | Up |
| RPL9 | -1.005189551 | 10.96702516 | -3.86008747 | 0.00119623765613143 | 0.0136070807053834 | -1.087954535 | Down |
| ST13P5 | -1.004741795 | 7.833870625 | -4.259935125 | 0.000497016261492138 | 0.00769698206418423 | -0.231082122 | Down |
| LOC642648 | -1.004391795 | 7.427735 | -7.073514204 | 1.57136882500462e-06 | 0.000191748131960118 | 5.42286892500113 | Down |
| KY | 1.0042458974359 | 6.025633125 | 3.28209190774758 | 0.00425782395071576 | 0.0316822287636409 | -2.314804888 | Up |
| SMIM14 | 1.0031441025641 | 8.48751125 | 4.57954081815561 | 0.000247663590628728 | 0.00487113527998631 | 0.451422485879905 | Up |
| SERPINB8 | 1.00235794871795 | 6.5810625 | 4.11131114494295 | 0.0006884737244121 | 0.0094389747616899 | -0.549555013 | Up |
| SERTAD4 | 1.00233871794872 | 5.347866875 | 3.89947708112966 | 0.00109688781028371 | 0.0128081984941295 | -1.003602497 | Up |
| RN7SL83P | -1.002274872 | 5.199495 | -3.531927874 | 0.00246283775841351 | 0.0219424157627461 | -1.787923683 | Down |
| PPP1R3F | -1.002161026 | 6.2527675 | -5.718203747 | 2.23392974105659e-05 | 0.00107797516510986 | 2.81742088926023 | Down |
| INSIG2 | -1.001771282 | 6.8217875 | -3.192984927 | 0.00517065450510185 | 0.0362727245784928 | -2.500785724 | Down |
| AFAP1L1 | -1.001765897 | 5.944801875 | -5.456572113 | 3.83356648712177e-05 | 0.00148800646418426 | 2.28591411909744 | Down |
| HFM1 | -1.00090859 | 3.669208438 | -3.296273003 | 0.00412797348427019 | 0.0310056970666726 | -2.285100069 | Down |
| SESTD1 | -1.000678974 | 6.902765 | -3.111461221 | 0.00617232256999393 | 0.0405120591773721 | -2.66982783 | Down |
| TIPARP | 1.00049358974359 | 8.962094375 | 3.45767631157143 | 0.00289897412447169 | 0.0245339106459919 | -1.945226878 | Up |
| WDR45 | -1.000412821 | 7.26781125 | -4.971877667 | 0.000106471151687788 | 0.00282955887387376 | 1.28078740374507 | Down |
| SNRNP48 | -0.999884359 | 6.727790625 | -3.351022415 | 0.00366225580328338 | 0.028749139780103 | -2.170165472 | Down |
| GTPBP10 | 0.999742307692307 | 7.972280625 | 3.33403973641092 | 0.00380088175447722 | 0.0293351727691464 | -2.205858596 | Up |
| CABLES1 | -0.999541026 | 6.79482625 | -3.367712282 | 0.00353088332920842 | 0.0281155783238335 | -2.135052721 | Down |
| PPIAP24 | -0.998606923 | 4.343071875 | -3.542361946 | 0.00240701121318756 | 0.0216019292821573 | -1.765778365 | Down |
| GALM | 0.998475641025641 | 7.250928125 | 4.37076284877327 | 0.000390080049634389 | 0.00661481145458202 | 0.00606261679290743 | Up |
| PYGL | -0.997918205 | 6.991858125 | -4.439285681 | 0.0003359377150133 | 0.00598140866819835 | 0.152462429553605 | Down |
| DNAH1 | 0.997699743589745 | 5.986734375 | 3.26014845780543 | 0.00446671226387322 | 0.032747927881124 | -2.360713683 | Up |
| ERGIC2 | 0.997609743589743 | 8.07676125 | 5.07505129012694 | 8.54812221287054e-05 | 0.0025011072105583 | 1.49675698877519 | Up |
| MEIS3 | -0.997573077 | 5.641971875 | -4.923923795 | 0.000117954246374588 | 0.0030310469903556 | 1.18007503275049 | Down |
| UBE3A | -0.997364615 | 8.18863125 | -6.877014181 | 2.27376011258764e-06 | 0.000241984141297169 | 5.06139256312742 | Down |
| TMEM222 | 0.997074871794871 | 7.56825 | 3.41147260366505 | 0.003208119905497 | 0.0263353094849622 | -2.042830528 | Up |
| RN7SL7P | -0.997069744 | 6.3096075 | -4.884283566 | 0.000128397704890689 | 0.00321967506889744 | 1.09667123824164 | Down |
| MID1IP1 | -0.996970513 | 6.866378125 | -3.542184867 | 0.00240794809182092 | 0.0216020193133449 | -1.766154275 | Down |
| DHX15 | -0.996027949 | 8.495810625 | -4.870088868 | 0.000132362962307168 | 0.00325982713612723 | 1.06677286502048 | Down |
| PDGFRB | -0.995007692 | 7.88553625 | -3.314771213 | 0.00396443863075093 | 0.0301563874565639 | -2.246311078 | Down |
| AQPEP | -0.994897692 | 3.079615625 | -3.968388425 | 0.000942559717478019 | 0.0115988592055228 | -0.85594666 | Down |
| CCT5 | -0.994684103 | 8.6483625 | -5.975171 | 1.32541332710579e-05 | 0.00078888047801904 | 3.33101245549953 | Down |
| OXNAD1 | 0.994491025641028 | 7.359010625 | 3.81262801369978 | 0.00132799015238389 | 0.0145243859603995 | -1.1895252 | Up |
| CIDEB | 0.994152564102564 | 6.384895625 | 5.32199818552062 | 5.07726867188402e-05 | 0.0017956889368073 | 2.00936234458229 | Up |
| RNU6ATAC | 0.994063846153848 | 5.441716875 | 3.19213794018538 | 0.00518019293552062 | 0.0363112050370463 | -2.502547677 | Up |
| RNA5SP283 | 0.994022051282046 | 6.93737625 | 3.50503654829979 | 0.0026127113698788 | 0.0228173724533282 | -1.844953432 | Up |
| HTATIP2 | -0.993994872 | 7.5787025 | -3.846584553 | 0.00123233100258244 | 0.0138716607594106 | -1.116860514 | Down |
| SUMO1 | -0.993951282 | 7.31717125 | -5.213097373 | 6.38321852713462e-05 | 0.00211191249625534 | 1.78409526510777 | Down |
| HMGN4 | 0.993696153846154 | 8.644148125 | 4.6382933957225 | 0.000218067667775756 | 0.00449381355689615 | 0.576326376427385 | Up |
| SRPK3 | -0.993289231 | 5.5396125 | -6.155298934 | 9.23951635683116e-06 | 0.000605140304973885 | 3.68577430576535 | Down |
| GALNT12 | 0.993061794871795 | 7.483289375 | 3.00909929045735 | 0.00770135111790127 | 0.0468411770628719 | -2.880369025 | Up |
| CAV3 | -0.992964872 | 4.924419375 | -4.368997015 | 0.000391586551819881 | 0.00661481145458202 | 0.00228739518753951 | Down |
| UIMC1 | -0.992921538 | 6.64858125 | -5.018150262 | 9.64727308982548e-05 | 0.00267275341903651 | 1.37777159576888 | Down |
| DIAPH1 | -0.992372821 | 8.15138375 | -3.184230027 | 0.00527008536348552 | 0.0366765839255769 | -2.518992634 | Down |
| IGFBP6 | -0.992138205 | 7.122894375 | -3.392423093 | 0.00334487463181974 | 0.0270995046012296 | -2.083003565 | Down |
| LINC00917 | -0.991431538 | 3.635911875 | -3.84484129 | 0.00123706956700857 | 0.0138817430901631 | -1.120591937 | Down |
| ZMYND8 | 0.991356410256407 | 7.40170375 | 5.9386954386422 | 1.42661948525532e-05 | 0.000809007794229821 | 3.25863935375982 | Up |
| GNE | -0.991172564 | 6.692215625 | -4.048189075 | 0.000790871261641208 | 0.010402277931756 | -0.684880902 | Down |
| HSP90AB1 | -0.990315385 | 11.09216875 | -5.494729869 | 3.54137398438828e-05 | 0.00141636026574222 | 2.36394805027453 | Down |
| TBC1D22B | 0.990263589743591 | 7.2066625 | 4.40023973457758 | 0.00036578140690608 | 0.00631450581972969 | 0.0690641338282489 | Up |
| HTRA3 | -0.989862564 | 6.35381 | -4.244909784 | 0.000513638286127129 | 0.00785007707197704 | -0.263260048 | Down |
| LCA5 | -0.989764615 | 5.97213625 | -3.954755258 | 0.000971256757637695 | 0.0117840089798343 | -0.885164991 | Down |
| NEIL2 | -0.989137692 | 6.462565625 | -5.35450573 | 4.74317768167426e-05 | 0.00171435304070129 | 2.0763541625562 | Down |
| BTBD10 | 0.989076153846153 | 7.436564375 | 4.91063424295414 | 0.000121355153222796 | 0.003091174378321 | 1.15212860823764 | Up |
| RNA5SP207 | -0.988903077 | 6.78805625 | -4.551659723 | 0.000263106535396885 | 0.00510957905556466 | 0.392076751555315 | Down |
| RNA5SP305 | -0.988476667 | 4.607119375 | -5.048292455 | 9.04810537732404e-05 | 0.00257671390858805 | 1.44084023224541 | Down |
| CHRND | -0.98758 | 4.48967125 | -5.106029074 | 8.00446467433074e-05 | 0.00241658106430863 | 1.56140292846694 | Down |
| CYTH1 | 0.98755051282051 | 8.551278125 | 3.21445438442188 | 0.00493454533179116 | 0.0351066691233384 | -2.456085618 | Up |
| AGBL2 | 0.986849743589744 | 5.10475875 | 4.01540490485235 | 0.000849969285059222 | 0.0109207464867008 | -0.755164878 | Up |
| TMEM131 | 0.986807435897433 | 8.179184375 | 4.44308839454821 | 0.000333166429803791 | 0.00594117060400685 | 0.160581071475558 | Up |
| KPNA4 | -0.985284103 | 7.85446 | -3.544980909 | 0.00239319709367252 | 0.021536001800087 | -1.760218393 | Down |
| ST13 | -0.984121538 | 9.73990125 | -5.025537001 | 9.49678406665731e-05 | 0.00265079696097703 | 1.39323532280634 | Down |
| ABI3 | 0.98316846153846 | 6.595744375 | 4.18706898631895 | 0.000583041362713796 | 0.00853813897360648 | -0.387176088 | Up |
| PROM2 | 0.983046410256411 | 6.765371875 | 3.37671373243737 | 0.00346197180698444 | 0.0277469659234479 | -2.116101076 | Up |
| ZFP36L2 | 0.982576153846157 | 11.02551313 | 4.22966713399413 | 0.000531074910101745 | 0.00801661885529587 | -0.29590874 | Up |
| INO80D | 0.982555641025645 | 8.181663125 | 4.95543491045485 | 0.000110273963317627 | 0.002897582032744 | 1.24627750957228 | Up |
| DNPH1 | 0.98245717948718 | 7.879133125 | 6.21683840514125 | 8.17598882746429e-06 | 0.000555224319459804 | 3.8059552938959 | Up |
| C6orf211 | -0.982084103 | 6.83324 | -4.307603622 | 0.000447794710362885 | 0.00725979295262621 | -0.129035851 | Down |
| RPL7L1P11 | -0.981268718 | 3.8298725 | -4.280611746 | 0.00047502724817474 | 0.00750098920949097 | -0.186810905 | Down |
| YWHAQ | 0.981176923076921 | 11.09240625 | 4.00565232815072 | 0.000868392407488381 | 0.0110627565307912 | -0.776071653 | Up |
| RBBP8 | 0.980707179487178 | 7.36842125 | 3.76365336139789 | 0.00147918992385364 | 0.0155781923983237 | -1.294249532 | Up |
| RNU6-508P | 0.98033641025641 | 4.36663 | 3.45315581781066 | 0.0029278705218337 | 0.0247066901710276 | -1.954786225 | Up |
| MAP3K11 | 0.980157435897438 | 7.49210125 | 4.6348404035332 | 0.000219703186453427 | 0.00449966798477154 | 0.568991527743527 | Up |
| LINC00909 | -0.97993641 | 5.603005 | -4.082436335 | 0.00073354490453998 | 0.00987679439059117 | -0.611457892 | Down |
| RNA5SP398 | -0.979662564 | 4.5038875 | -4.077360209 | 0.000741770150186629 | 0.00995304369050073 | -0.622340587 | Down |
| ENO4 | 0.97946717948718 | 4.74249375 | 3.59271685452586 | 0.00215477003039564 | 0.0200460238895102 | -1.658777758 | Up |
| UHMK1 | -0.978224359 | 8.288449375 | -3.584825833 | 0.0021924876413268 | 0.020277900577938 | -1.675558973 | Down |
| MIR182 | -0.978118718 | 2.865021875 | -5.052770187 | 8.96240090785398e-05 | 0.00256302672342764 | 1.45020194656658 | Down |
| SSR4 | 0.978110256410256 | 7.24843125 | 5.00994206830717 | 9.81736063263125e-05 | 0.00269681509824689 | 1.36058221327046 | Up |
| CRTC1 | 0.977972051282051 | 7.730625625 | 3.58235406800369 | 0.00220443669117952 | 0.0203722466143224 | -1.680814492 | Up |
| THEM4 | 0.977835897435899 | 7.255625 | 5.19836748894963 | 6.58461008519917e-05 | 0.00215351948247102 | 1.75352843304457 | Up |
| AK1 | -0.977568205 | 7.5338725 | -3.740140573 | 0.0015577789713715 | 0.016143688077259 | -1.344490044 | Down |
| MED9 | -0.977048462 | 6.484538125 | -5.822099609 | 1.80701304143267e-05 | 0.000934487582232039 | 3.02611209315163 | Down |
| KIAA1731 | 0.976475128205126 | 5.933599375 | 3.85033577867799 | 0.00122219592190463 | 0.0138079109800442 | -1.108830759 | Up |
| EIF4B | -0.975664957 | 9.64607333333333 | -5.358376183 | 4.70493174271474e-05 | 0.00171340381449144 | 2.0843225433273 | Down |
| JMJD6 | -0.975540513 | 6.82728 | -4.696028567 | 0.000192484332324903 | 0.0041666657912392 | 0.698850845144241 | Down |
| ZNF675 | 0.975293846153845 | 6.13399625 | 3.286239688 | 0.00421943399217579 | 0.0314796248577596 | -2.306119507 | Up |
| MSANTD4 | -0.974511282 | 6.50847625 | -3.893165131 | 0.00111223282677071 | 0.0129161985518411 | -1.017122148 | Down |
| ATAT1 | 0.974494188034185 | 5.67792208333333 | 3.02509080555834 | 0.00744023175862702 | 0.045742411394967 | -2.847612243 | Up |
| HEATR6 | 0.973442564102563 | 7.30977875 | 5.59144790692984 | 2.89895417391123e-05 | 0.00124405233514817 | 2.56096083803953 | Up |
| TYMSOS | -0.973437692 | 5.585861875 | -6.29645628 | 6.98482063810158e-06 | 0.000499788268131125 | 3.96065875933544 | Down |
| KBTBD2 | -0.973408974 | 7.039171875 | -4.047100075 | 0.00079276632148561 | 0.0104154479452453 | -0.687215607 | Down |
| ESRRA | -0.973325128 | 7.03767 | -4.787766047 | 0.000157955703642524 | 0.00368527044362928 | 0.893051704440099 | Down |
| COL4A1 | -0.973014103 | 7.209179375 | -3.081675902 | 0.00658371813187551 | 0.0421779803420208 | -2.731297445 | Down |
| CWC15 | 0.972484871794871 | 6.442440625 | 5.9715405011037 | 1.33514581256711e-05 | 0.00078888047801904 | 3.3238169722493 | Up |
| ZNF43 | 0.971803589743589 | 7.17787375 | 4.89404586658987 | 0.000125741189973867 | 0.00317513533555896 | 1.11722377731952 | Up |
| HIST2H2BA | 0.971670512820511 | 8.997235625 | 3.73811502813201 | 0.00156474118543574 | 0.0161867022640726 | -1.348816835 | Up |
| NECAB2 | -0.970632564 | 4.633234375 | -5.92784772 | 1.45823159564244e-05 | 0.000818963946979238 | 3.23708154794056 | Down |
| ACTB | 0.97040769230769 | 12.46835625 | 4.40357237679239 | 0.000363132498132296 | 0.00627858244359749 | 0.0761848618031173 | Up |
| SMIM8 | -0.969587949 | 7.154143125 | -4.905409258 | 0.000122719546785049 | 0.00311571293782042 | 1.14113687436637 | Down |
| LZTS3 | -0.969161538 | 6.12949625 | -5.144548644 | 7.37747603266095e-05 | 0.00228957168965684 | 1.64165465855499 | Down |
| FIBP | 0.968964871794869 | 8.463780625 | 4.00377149885953 | 0.000871991304901979 | 0.0110815165449021 | -0.780103535 | Up |
| ATAD1 | -0.968859231 | 8.192091875 | -5.37946883 | 4.50199745023725e-05 | 0.0016600762020223 | 2.12771778773444 | Down |
| PHF13 | -0.968670769 | 5.984015 | -5.301885844 | 5.29597235032983e-05 | 0.00184780280792122 | 1.96785591566467 | Down |
| ST3GAL1 | 0.968484615384615 | 9.19193375 | 3.19677810768572 | 0.00512814805549112 | 0.0361311205348644 | -2.492893505 | Up |
| SIX2 | -0.968461538 | 7.048465 | -4.750294656 | 0.000171225066754375 | 0.00387450740858663 | 0.813802540412446 | Down |
| CRYL1 | -0.968409231 | 6.9270375 | -4.92972251 | 0.000116500960834026 | 0.00300696333793871 | 1.19226425929258 | Down |
| KCTD13 | 0.968128974358977 | 6.436498125 | 4.72276449101655 | 0.00018169356465919 | 0.00403307801096357 | 0.75551187662385 | Up |
| GOLGA5 | 0.968077179487178 | 8.568959375 | 5.07703535080488 | 8.51219532249352e-05 | 0.00249866166727149 | 1.50090023687211 | Up |
| GPD1 | -0.967762308 | 5.204563125 | -3.629629177 | 0.0019867315176401 | 0.0189747343948739 | -1.580217827 | Down |
| ICAM2 | 0.966864615384613 | 8.0107875 | 3.30178090941644 | 0.00407859795229435 | 0.0307239439153602 | -2.273555338 | Up |
| ZSWIM6 | 0.966669230769231 | 9.05753875 | 5.000812264 | 0.000100101512502697 | 0.00272873210748579 | 1.34145545659631 | Up |
| SLCO3A1 | 0.966374615384618 | 8.584139375 | 4.39993703711855 | 0.000366022970028524 | 0.00631450581972969 | 0.0684173492083744 | Up |
| ARMC1 | -0.966356154 | 7.081335625 | -4.818907606 | 0.000147727994637916 | 0.00354958388765558 | 0.958831669438672 | Down |
| NDUFS2 | -0.966334359 | 8.36958 | -5.626088474 | 2.69915051386975e-05 | 0.00120505257288657 | 2.63124621269837 | Down |
| HSPD1 | -0.965201795 | 8.780276875 | -5.779254676 | 1.97184649768755e-05 | 0.00099691597226906 | 2.94021955677009 | Down |
| ATG14 | -0.964927436 | 7.353773125 | -5.839356613 | 1.744696934121e-05 | 0.000917915382473097 | 3.06064038138274 | Down |
| ZNF117 | 0.964677948717949 | 7.2147375 | 4.57706459903187 | 0.000248997055706827 | 0.00488911068016766 | 0.446153607903957 | Up |
| CTNNA3 | -0.964508718 | 3.66954 | -3.949847894 | 0.000981799863990024 | 0.0118625243286757 | -0.895681667 | Down |
| CTU1 | -0.963642051 | 6.3469175 | -5.630915341 | 2.67245645870973e-05 | 0.00120505257288657 | 2.64102812671653 | Down |
| LYPD2 | -0.96342 | 5.47657125 | -5.186946776 | 6.74523145685238e-05 | 0.00216891395843963 | 1.72981305824369 | Down |
| ADAP2 | 0.963235897435898 | 7.0024625 | 3.54850093374635 | 0.00237475413850042 | 0.0214279499442622 | -1.752744581 | Up |
| AGBL1 | -0.962898462 | 3.472725 | -5.197370625 | 6.598472557618e-05 | 0.00215351948247102 | 1.75145896397965 | Down |
| IL17D | -0.962544359 | 6.669179375 | -6.707296085 | 3.14178848615802e-06 | 0.000301206013800992 | 4.74464208752258 | Down |
| FBRS | 0.962539999999999 | 7.27095375 | 3.98965085466275 | 0.000899493811626589 | 0.0112894465630484 | -0.81037256 | Up |
| LUZP6 | 0.962336153846151 | 10.01967813 | 3.57903445833522 | 0.00222058633007956 | 0.0204808886407456 | -1.687871967 | Up |
| APOPT1 | -0.961897692 | 6.193288125 | -3.98892975 | 0.000900921460704371 | 0.011290394055139 | -0.811918267 | Down |
| NUP214 | 0.961147179487179 | 8.63295875 | 5.14928678905057 | 7.30390574452102e-05 | 0.00227583063084962 | 1.65151579976337 | Up |
| TMEM245 | -0.961117949 | 9.720125 | -3.073592679 | 0.00669990591977787 | 0.0427119002385839 | -2.747950861 | Down |
| MAP3K5 | -0.960634103 | 8.662588125 | -3.931066637 | 0.00102322232096673 | 0.0122441405453122 | -0.935926873 | Down |
| SNAPC3 | 0.959998974358973 | 9.1025625 | 3.80769485063336 | 0.00134249248522014 | 0.0146247928572307 | -1.200078375 | Up |
| ALDH18A1 | -0.959622821 | 8.171383125 | -3.510841676 | 0.00257961011069759 | 0.0226026213721912 | -1.832647768 | Down |
| MPPED1 | -0.959468205 | 6.16525875 | -5.455341227 | 3.84339422250366e-05 | 0.00148800646418426 | 2.2833940646302 | Down |
| AREL1 | 0.959258974358975 | 8.28132125 | 5.29395550302824 | 5.38484353842616e-05 | 0.00186568336245706 | 1.95147760466391 | Up |
| ERLIN1 | 0.958915897435899 | 8.2923825 | 4.4095613818544 | 0.000358420966809007 | 0.00622019171512847 | 0.0889801793331353 | Up |
| RN7SL549P | -0.958834615 | 5.004026875 | -3.974550346 | 0.000929870168195921 | 0.0114930395658559 | -0.842739706 | Down |
| MAPK10 | 0.958624615384613 | 7.4535425 | 3.0666440201156 | 0.00680138269721673 | 0.0431266706625562 | -2.762256919 | Up |
| PDE7B | 0.957606923076922 | 6.719495625 | 3.13010479260403 | 0.00592771491972419 | 0.0394059474141505 | -2.631270446 | Up |
| RPLP0 | 0.957436794871796 | 11.42708406 | 3.1792436524373 | 0.005327551757089 | 0.0369049346042839 | -2.529356871 | Up |
| SNX19P1 | 0.95704717948718 | 2.6955675 | 3.18084871145708 | 0.00530898724539306 | 0.036826358847731 | -2.52602118 | Up |
| WASF2 | 0.956931025641023 | 8.116633125 | 5.08982038526979 | 8.28436325476121e-05 | 0.00245653504298625 | 1.52758959422785 | Up |
| C2orf82 | -0.956761026 | 6.339555 | -7.236892589 | 1.16036113361937e-06 | 0.000154092674209162 | 5.71910383419903 | Down |
| TMEM14C | 0.956662564102563 | 9.927375 | 3.73772173691367 | 0.0015660966064051 | 0.0161867022640726 | -1.349656926 | Up |
| MPV17L2 | 0.956617692307693 | 7.805751875 | 3.46158796941527 | 0.00287419763239053 | 0.0243773377795219 | -1.936953327 | Up |
| MRPS28 | -0.956524359 | 6.059690625 | -4.214934798 | 0.000548495936710627 | 0.00817209222654618 | -0.327469123 | Down |
| NRM | 0.956293931623929 | 6.610744375 | 3.39405484565781 | 0.00333293824824848 | 0.0270382150198146 | -2.079564028 | Up |
| MAF1 | -0.956038205 | 7.913725625 | -4.302888254 | 0.000452435676391209 | 0.00730257500668276 | -0.139127363 | Down |
| UBB | 0.956025641025642 | 12.3235375 | 5.7881137823488 | 1.93653653945271e-05 | 0.000981192546196183 | 2.95799915161898 | Up |
| BTF3L4 | 0.955473205128206 | 8.520145313 | 4.89014689923777 | 0.000126795380597968 | 0.00319365525018552 | 1.1090162625241 | Up |
| TMEM41B | 0.955058205128206 | 7.273138125 | 3.77775135661936 | 0.00143398178054063 | 0.0152696330505455 | -1.264113641 | Up |
| SUPT7L | 0.95492 | 8.1609925 | 4.84454531165791 | 0.000139816199599643 | 0.00340156175790071 | 1.01292819640195 | Up |
| CLP1 | -0.953525897 | 6.010226875 | -5.630675007 | 2.67377912801532e-05 | 0.00120505257288657 | 2.6405411456086 | Down |
| RN7SKP16 | -0.953520256 | 4.730138125 | -3.960175508 | 0.000959743824764163 | 0.0117105788732122 | -0.873548744 | Down |
| COPRS | -0.95329 | 7.766491875 | -5.309296807 | 5.21428161553498e-05 | 0.00183025996405533 | 1.98315532709714 | Down |
| SIPA1L3 | 0.953231538461536 | 7.638120625 | 3.17055463273266 | 0.00542916091200794 | 0.0373046737547668 | -2.547407368 | Up |
| RSBN1L | -0.952999744 | 7.255444375 | -3.595633996 | 0.00214099059993008 | 0.0199802966067912 | -1.652572897 | Down |
| ASF1A | 0.952927435897436 | 7.700066875 | 3.68715322728639 | 0.00175050478968778 | 0.0174573060576057 | -1.457605599 | Up |
| CCDC94 | 0.952846923076923 | 7.189908125 | 4.26770150349554 | 0.00048863876775561 | 0.0076127698931016 | -0.214452023 | Up |
| SURF6 | -0.952832821 | 6.06272 | -3.630365338 | 0.00198351642038604 | 0.018962189175528 | -1.578650077 | Down |
| PPP1R12A | 0.952772564102562 | 8.962404375 | 5.79072463612492 | 1.92625520560795e-05 | 0.000979108822617578 | 2.96323701655571 | Up |
| TNFSF15 | 0.952451025641025 | 5.411803125 | 3.55012389800456 | 0.00236629832644494 | 0.0213681964720853 | -1.749298306 | Up |
| TPGS1 | -0.95176 | 6.359645 | -5.990351428 | 1.28550483168693e-05 | 0.000776173675233168 | 3.36108019948661 | Down |
| TUSC1 | -0.951607949 | 5.779541875 | -6.616161222 | 3.74359022384834e-06 | 0.000344869001372463 | 4.57282675347716 | Down |
| ZFAND5 | -0.951282564 | 9.99221625 | -3.107487166 | 0.00622572465688338 | 0.040770712160152 | -2.678038676 | Down |
| FLVCR2 | 0.951191794871798 | 6.72667 | 4.13597917780038 | 0.000652184922219995 | 0.00916243157455179 | -0.496674888 | Up |
| CRLF1 | -0.950908718 | 7.26208 | -4.781748283 | 0.000160013879530593 | 0.00371458514962104 | 0.880331767694945 | Down |
| LYRM2 | 0.950873717948714 | 8.433051563 | 4.63215470686982 | 0.000220983896324924 | 0.00452100779195582 | 0.563286040060276 | Up |
| PPP2R2B | 0.950702051282051 | 4.84830875 | 5.22795893448264 | 6.18641909510383e-05 | 0.00207463122085734 | 1.81491222081099 | Up |
| ATP6V0E1 | 0.950223076923075 | 11.10895625 | 3.82142518060679 | 0.0013025164946026 | 0.0144012105975819 | -1.17070377 | Up |
| ECD | 0.95015512820513 | 8.696944375 | 6.65612639913138 | 3.46617898199738e-06 | 0.000324442704953466 | 4.64832062321937 | Up |
| ZNF135 | 0.950125897435897 | 7.003350625 | 3.33719297473919 | 0.00377475708774432 | 0.0292286589515139 | -2.199234085 | Up |
| RN7SL727P | -0.949995641 | 4.551791875 | -3.546317016 | 0.00238617995549035 | 0.0215060696916525 | -1.757381659 | Down |
| RN7SL364P | -0.949893846 | 4.76668125 | -5.047878864 | 9.0560637472223e-05 | 0.00257671390858805 | 1.43997543001105 | Down |
| ASB7 | 0.949611025641024 | 6.229865625 | 6.45147196388625 | 5.15312317172006e-06 | 0.00042235585953139 | 4.25930294030845 | Up |
| C11orf30 | 0.949436153846157 | 7.643046875 | 6.2725446733816 | 7.32241943626331e-06 | 0.000515600090033199 | 3.91428997382832 | Up |
| C19orf48 | 0.949430512820513 | 6.401505625 | 3.66980322087132 | 0.00181864232669057 | 0.0178854250872767 | -1.494609125 | Up |
| C10orf11 | 0.949023846153847 | 6.366641875 | 3.17554869050048 | 0.00537053075765984 | 0.0370767062703726 | -2.537034272 | Up |
| GPN1 | -0.948582564 | 7.2718 | -3.54923819 | 0.00237090924205997 | 0.021401542100965 | -1.751179085 | Down |
| POLR1B | 0.947691025641027 | 7.096725625 | 4.71315370017479 | 0.000185499755163253 | 0.00407986859025897 | 0.735149694697431 | Up |
| SOS2 | 0.947485641025644 | 9.39796875 | 4.00616556359081 | 0.000867412946226402 | 0.0110627565307912 | -0.774971439 | Up |
| OR7E14P | 0.947161538461536 | 7.41463875 | 3.64185744231214 | 0.00193399246190356 | 0.0186008241342784 | -1.554171344 | Up |
| HSD17B7P2 | 0.94711076923077 | 5.9971075 | 4.54291373279639 | 0.000268149695757622 | 0.00516936721176418 | 0.373451519016814 | Up |
| MED12 | 0.947076410256409 | 8.11515625 | 4.98723352940254 | 0.000103040744282276 | 0.00277638222773064 | 1.31299404700518 | Up |
| GRINA | 0.947024358974357 | 8.153160625 | 3.90116591922835 | 0.00109281818773602 | 0.0127843082974201 | -0.999984989 | Up |
| LOC652276 | -0.946819487 | 5.8207625 | -3.843775368 | 0.00123997595493299 | 0.0139076610113682 | -1.122873472 | Down |
| FUCA1 | 0.946743076923077 | 8.85625875 | 3.65554841724552 | 0.00187659782691887 | 0.0182850608494975 | -1.524997385 | Up |
| NPEPPS | -0.945915513 | 9.149785313 | -6.987291388 | 1.84675348295566e-06 | 0.000210991585427684 | 5.26495215137192 | Down |
| ETFA | -0.945655641 | 8.105018125 | -5.389993704 | 4.40411951793256e-05 | 0.00163450340134481 | 2.14935241199899 | Down |
| COG1 | 0.945418717948717 | 8.033589375 | 4.40609119040661 | 0.000361143355166997 | 0.00625635270394654 | 0.0815664087116552 | Up |
| NAA38 | 0.945364871794871 | 7.257855625 | 3.70794750331781 | 0.00167218694353858 | 0.0169450700404582 | -1.41323297 | Up |
| NCK1 | -0.944230513 | 7.869289375 | -4.963669402 | 0.000108352478626151 | 0.0028567547730087 | 1.26356301717373 | Down |
| CHID1 | 0.943764871794871 | 7.235925625 | 4.32860966404562 | 0.000427698185680584 | 0.00701503280341827 | -0.084088614 | Up |
| AMPH | -0.943572564 | 3.777150625 | -3.610679454 | 0.00207130150197333 | 0.0195132676259064 | -1.620560596 | Down |
| BOD1 | -0.943052051 | 8.369826875 | -3.867577974 | 0.00117667417628419 | 0.013463301436748 | -1.071917071 | Down |
| TOP1 | 0.942492564102563 | 9.527191875 | 4.64922577228678 | 0.000212970738947583 | 0.00443068484485024 | 0.599543855488918 | Up |
| COX7A1 | -0.942207949 | 6.542499375 | -3.135348363 | 0.00586064342798575 | 0.0391286090889858 | -2.620414998 | Down |
| SLC9A8 | 0.942180256410254 | 7.963438125 | 3.74463177455942 | 0.00154245194159053 | 0.0160419131649489 | -1.334895608 | Up |
| TRIM41 | 0.941949999999999 | 6.449524375 | 4.45745418017583 | 0.000322904710171683 | 0.00581138655817211 | 0.191245452922649 | Up |
| TRIM72 | -0.941590513 | 5.485684375 | -3.710221602 | 0.00166383690366467 | 0.0168751291182387 | -1.408378823 | Down |
| BAG2 | -0.941387436 | 6.960379375 | -4.522010853 | 0.000280604327854452 | 0.00532576960041018 | 0.32892019266303 | Down |
| RN7SL257P | -0.940980256 | 6.866496875 | -4.708927824 | 0.000187198950093317 | 0.00410060707690315 | 0.726194341026736 | Down |
| BBS12 | -0.940609487 | 6.037288125 | -3.151309315 | 0.00566102149843243 | 0.0382969452893344 | -2.587342696 | Down |
| RN7SL336P | -0.940532051 | 3.360224375 | -3.838109088 | 0.00125554105618873 | 0.0140349618209068 | -1.13500115 | Down |
| RN7SL209P | -0.940053077 | 4.816586875 | -4.683255711 | 0.000197867692260906 | 0.00421545000322206 | 0.671763901946437 | Down |
| MED1 | 0.939992564102567 | 7.974130625 | 5.11755881755144 | 7.81127168331893e-05 | 0.00237803596322016 | 1.58543958044971 | Up |
| AZU1 | -0.939002821 | 5.459306875 | -6.736036171 | 2.97355773758876e-06 | 0.000291196261302443 | 4.79857560015311 | Down |
| MAP2K5 | -0.938098205 | 6.479851875 | -3.80952096 | 0.00133710577531421 | 0.0146017566202571 | -1.196172014 | Down |
| RPL8 | 0.937958974358978 | 11.747125 | 4.68187454296177 | 0.000198458920838692 | 0.00422418453697478 | 0.66883423613334 | Up |
| ARNTL | -0.937451538 | 6.878330625 | -3.131008246 | 0.00591610538727256 | 0.0393624516874569 | -2.629400425 | Down |
| GUSBP11 | 0.937447948717948 | 7.966583125 | 3.57508201494434 | 0.00223996809783312 | 0.0205863314101721 | -1.696273713 | Up |
| GPR124 | 0.937111282051282 | 7.00828625 | 3.99825955116431 | 0.000882624800142783 | 0.0111834398875417 | -0.791919173 | Up |
| PSMA5 | -0.936753077 | 7.517818125 | -3.402581777 | 0.00327124451685991 | 0.0266770104809146 | -2.061585309 | Down |
| RBM27 | 0.936595897435896 | 8.0830775 | 5.70090238372941 | 2.31454414827142e-05 | 0.00110998107950127 | 2.78253435400124 | Up |
| BNIP3L | 0.936399487179482 | 9.75359125 | 4.87482095548187 | 0.000131027361416491 | 0.00324188398358192 | 1.0767419633217 | Up |
| ZNRD1 | 0.935434358974359 | 5.50934375 | 3.43566533073766 | 0.00304238602333036 | 0.0254153731346812 | -1.991752765 | Up |
| GNG7 | 0.935014102564103 | 7.628335625 | 4.6258569808767 | 0.000224016913541469 | 0.00456000516557857 | 0.549905361831091 | Up |
| TYW3 | -0.93445641 | 7.9274375 | -3.52105722 | 0.00252236744187407 | 0.0222628939135208 | -1.810985454 | Down |
| TXNIP | -0.934374359 | 12.3999875 | -3.346604519 | 0.00369783067766031 | 0.0288847405103803 | -2.179454231 | Down |
| ARSA | 0.934176666666668 | 7.289221875 | 4.3016829176188 | 0.000453629781963885 | 0.00731310653715158 | -0.141707049 | Up |
| FTSJ3 | -0.93378 | 6.76326375 | -3.033880389 | 0.00730040135983699 | 0.0451359277674287 | -2.829585778 | Down |
| ALG3 | 0.933682820512823 | 9.128680625 | 4.17703690858291 | 0.00059600894326628 | 0.00866033693310921 | -0.408674645 | Up |
| FERMT2 | -0.933551538 | 7.939039375 | -3.034636522 | 0.00728849255945184 | 0.0451309500752243 | -2.828034311 | Down |
| CLDN5 | -0.933486923 | 6.666391875 | -5.102743124 | 8.06041492483665e-05 | 0.00242101423965868 | 1.55455012483743 | Down |
| GPR146 | -0.933289231 | 5.8167325 | -3.349865054 | 0.00367154261853165 | 0.0287661405903654 | -2.172599094 | Down |
| S100PBP | 0.932923846153847 | 7.184430625 | 4.89097794943157 | 0.000126569929716474 | 0.00319260319469898 | 1.11076577156688 | Up |
| ZDHHC12 | 0.932836153846153 | 7.548419375 | 3.23946111438152 | 0.00467285537298371 | 0.0338967445310088 | -2.403930728 | Up |
| ZNF417 | -0.932490256 | 6.799265 | -5.019374393 | 9.62216647430447e-05 | 0.00267275341903651 | 1.38033459949845 | Down |
| C5AR1 | 0.932195641025642 | 6.614115625 | 3.22088640081681 | 0.0048658925449818 | 0.0348058537801759 | -2.442679915 | Up |
| KSR1 | 0.931934615384614 | 7.698376875 | 3.31767926533383 | 0.0039393170271701 | 0.0300240882773883 | -2.240209006 | Up |
| PEX11B | 0.931808205128205 | 8.7211975 | 3.59104493674722 | 0.00216270723503345 | 0.0200750429047585 | -1.662333692 | Up |
| CAND2 | -0.931556154 | 6.076870625 | -3.311121231 | 0.00399619298258063 | 0.0303484098550038 | -2.253968381 | Down |
| KDM6A | 0.931510769230773 | 8.0835725 | 4.84248578257928 | 0.000140435490744009 | 0.00341306567546468 | 1.00858447146646 | Up |
| C21orf33 | -0.931289744 | 7.63782375 | -3.633877316 | 0.00196824942266577 | 0.0188471607617383 | -1.57117035 | Down |
| GNL3 | -0.930851795 | 7.26669625 | -3.015092138 | 0.00760246796988393 | 0.0464457984204678 | -2.868099469 | Down |
| HSPA12A | -0.930832051 | 6.477105625 | -3.839544097 | 0.00125158072772917 | 0.0140108511148818 | -1.131929867 | Down |
| PPIP5K1 | 0.930234871794869 | 7.4081525 | 3.86905990037775 | 0.00117284187401365 | 0.0134260439870512 | -1.068744013 | Up |
| SLITRK4 | -0.929282308 | 4.563258125 | -3.21310005 | 0.00494912167093467 | 0.0351627350451704 | -2.458907525 | Down |
| AK4 | -0.929085513 | 6.041669688 | -4.647209102 | 0.000213901756656559 | 0.0044337532886098 | 0.595261565536134 | Down |
| ODF2L | 0.928961794871793 | 7.013008125 | 6.47585234586773 | 4.91388247828727e-06 | 0.000410494117997998 | 4.30596190475998 | Up |
| BCL2L11 | 0.928493589743591 | 7.434924375 | 3.33777542216051 | 0.00376995090552752 | 0.0292205672614333 | -2.198010306 | Up |
| RNU6-1295P | 0.928379487179487 | 5.538145 | 3.40222120868989 | 0.00327383028618903 | 0.0266777105390859 | -2.062345723 | Up |
| CEBPG | -0.928184872 | 7.067053125 | -4.481351851 | 0.000306539158268981 | 0.00559914432740999 | 0.242234383501438 | Down |
| LIPT1 | 0.927937692307693 | 5.354969375 | 4.18736045401753 | 0.000582668894392499 | 0.00853813897360648 | -0.386551502 | Up |
| RPS16 | -0.927828718 | 10.0909725 | -5.174955857 | 6.91819685724282e-05 | 0.00220880019385971 | 1.70489907646882 | Down |
| ATP5L | -0.92743 | 9.726063125 | -4.94507143 | 0.000112741819292777 | 0.0029396124578169 | 1.22451430664712 | Down |
| SIRT2 | -0.927195897 | 7.96722 | -3.75952236 | 0.00149270469666662 | 0.0156712108843406 | -1.303078264 | Down |
| HECW2 | 0.926961538461538 | 6.34556625 | 4.15407603468995 | 0.000626794469883114 | 0.00898443955077844 | -0.457884824 | Up |
| LCLAT1 | 0.926933846153847 | 8.15966375 | 2.99794976422282 | 0.00788865986071566 | 0.0476570750061431 | -2.9031765 | Up |
| FAM117B | 0.926863846153846 | 7.864416875 | 3.85526135199678 | 0.00120901465192105 | 0.0136921790536073 | -1.098286557 | Up |
| UQCRBP1 | -0.926541026 | 5.30155875 | -5.762167461 | 2.04183763672097e-05 | 0.00102182520865907 | 2.90589819296045 | Down |
| ADAMTS17 | -0.926462821 | 5.073335625 | -5.649875481 | 2.57020350292792e-05 | 0.0011838682419514 | 2.6794239258868 | Down |
| SMIM21 | -0.926192821 | 3.457275 | -4.752995361 | 0.000170231781453442 | 0.00385577466504896 | 0.819517853728218 | Down |
| MPP6 | -0.925757436 | 7.00330875 | -5.166768953 | 7.03889503954263e-05 | 0.00223696561503502 | 1.68788031995801 | Down |
| RN7SL615P | -0.925428205 | 3.63630625 | -3.877110416 | 0.00115224050604802 | 0.013268413771967 | -1.051505403 | Down |
| EIF2S1 | -0.925228205 | 8.80894875 | -6.297136428 | 6.97545685763887e-06 | 0.000499788268131125 | 3.96197650977179 | Down |
| MCCC1 | -0.925138974 | 7.16694125 | -5.480782068 | 3.64542907210815e-05 | 0.00143824124155235 | 2.33544422375432 | Down |
| MKRN4P | -0.925011026 | 5.659841875 | -3.905440097 | 0.00108258615180384 | 0.0127050049233934 | -0.990829358 | Down |
| ECSIT | -0.924574615 | 7.054303125 | -4.519710144 | 0.000282010579537818 | 0.00533508163740903 | 0.324017335598423 | Down |
| NBL1 | -0.922874615 | 6.915894375 | -4.814334949 | 0.000149186403497158 | 0.00357357400442782 | 0.949177666870154 | Down |
| SUOX | 0.922258974358976 | 6.97757875 | 3.59836729745731 | 0.00212815910357013 | 0.0198966936997163 | -1.64675849 | Up |
| SIKE1 | 0.921976153846155 | 7.305445625 | 5.72109054622672 | 2.22076305984204e-05 | 0.00107384490945515 | 2.82323814988733 | Up |
| TRAPPC2 | 0.921743076923078 | 6.21615625 | 3.50349554025719 | 0.00262156884353328 | 0.0228414598266281 | -1.848219524 | Up |
| UQCC1 | -0.921728974 | 6.525951875 | -4.366598167 | 0.000393642547560217 | 0.00662906564738872 | -0.002841353 | Down |
| PHLDA3 | -0.92170641 | 6.533956875 | -5.576535566 | 2.98959483703222e-05 | 0.00126000880409964 | 2.530658506 | Down |
| HIVEP3 | 0.921294358974357 | 6.323825 | 3.7493743325312 | 0.00152643059076853 | 0.0158965673722262 | -1.324763135 | Up |
| LOC100287852 | 0.921141794871796 | 4.751574375 | 3.13855514963452 | 0.00581999128029702 | 0.0389723099877583 | -2.61377382 | Up |
| RNY3P2 | 0.920782307692308 | 4.186525625 | 3.24661501854002 | 0.00460053264935242 | 0.033476307979537 | -2.388992946 | Up |
| HIST2H2BF | 0.920671794871794 | 8.0330125 | 3.34678234029447 | 0.00369639221763095 | 0.0288847405103803 | -2.179080403 | Up |
| QRICH1 | 0.920641538461537 | 9.12805125 | 6.31009958644505 | 6.799450462504e-06 | 0.000498180132296479 | 3.98707951828324 | Up |
| CCDC107 | -0.920561538 | 6.40554375 | -6.022723053 | 1.20449071377395e-05 | 0.000744643635701048 | 3.42509471551226 | Down |
| CCT2 | -0.920517949 | 8.1506025 | -3.673174202 | 0.00180519988018927 | 0.0178254882699257 | -1.487421037 | Down |
| ABLIM1 | -0.920399231 | 8.960895625 | -3.688060118 | 0.00174701406553575 | 0.0174459844825676 | -1.455670916 | Down |
| IFI27 | 0.92038512820513 | 7.55770625 | 3.53963663947768 | 0.0024214703188654 | 0.0216816015066446 | -1.771563474 | Up |
| FKTN | 0.919672820512819 | 5.9989775 | 4.80628736297647 | 0.000151788871217583 | 0.00359832645457619 | 0.932183223998074 | Up |
| ZFYVE20 | -0.919585897 | 6.087283125 | -4.763710551 | 0.000166348382543001 | 0.00382732650733439 | 0.842188308622218 | Down |
| ATP6V1H | -0.918351795 | 7.4166125 | -3.377990873 | 0.00345230272204749 | 0.0276885132631661 | -2.1134114 | Down |
| HSP90AB4P | -0.918349744 | 4.2631075 | -5.594604844 | 2.88013097279193e-05 | 0.00124405233514817 | 2.56737234158315 | Down |
| KLHL31 | -0.918178718 | 4.477113125 | -4.689359303 | 0.000195276355794054 | 0.00418318568427576 | 0.684708975770454 | Down |
| RRP7A | -0.918031026 | 7.664733125 | -4.490366964 | 0.000300586314263164 | 0.00555334896808684 | 0.261462082724722 | Down |
| TMEM138 | 0.917746666666669 | 8.0247725 | 3.42438694039881 | 0.00311856812622363 | 0.0258847818083668 | -2.015572631 | Up |
| UBXN6 | -0.917713077 | 8.219768125 | -4.252511599 | 0.000505159603230433 | 0.00777145536138066 | -0.246979492 | Down |
| TCF12 | 0.917661794871794 | 9.486926875 | 7.23537607465938 | 1.1636122478574e-06 | 0.000154092674209162 | 5.71637213501469 | Up |
| IPO5 | -0.917298462 | 8.739565 | -5.102726516 | 8.06069871701692e-05 | 0.00242101423965868 | 1.55451548742482 | Down |
| SEC24D | 0.916185641025643 | 8.5635475 | 4.05680235304377 | 0.000776042299996638 | 0.0102826707709049 | -0.666414838 | Up |
| C22orf46 | 0.915717435897435 | 5.89550375 | 4.08060737899123 | 0.000736497867800782 | 0.00990897869587803 | -0.61537898 | Up |
| CCAR1 | 0.915072051282049 | 9.149869375 | 5.63296636682908 | 2.66119605105981e-05 | 0.00120505257288657 | 2.6451837717699 | Up |
| FBXO21 | -0.914976923 | 8.00147125 | -3.699814353 | 0.00170239388980501 | 0.017169058584892 | -1.430591122 | Down |
| RFX7 | 0.914830256410258 | 7.61855625 | 4.63581827784101 | 0.000219238751322721 | 0.00449966798477154 | 0.571068806862282 | Up |
| ZNF207 | 0.914780769230765 | 9.223699375 | 4.85845463428048 | 0.000135706041133121 | 0.00331193790648132 | 1.04225508869519 | Up |
| UCHL3 | -0.914318205 | 8.687693125 | -4.570002582 | 0.00025284023009214 | 0.0049437476868771 | 0.431125131123389 | Down |
| SLC12A9 | 0.914279230769229 | 6.865291875 | 4.65566589614592 | 0.000210025099273268 | 0.00439018384642338 | 0.613217325709273 | Up |
| TTL | -0.913901026 | 6.98003875 | -3.353728733 | 0.0036406303159686 | 0.0286469178846321 | -2.164474154 | Down |
| LOC102724229 | 0.913816666666667 | 6.307939375 | 3.94449712077849 | 0.000993426598892709 | 0.0119781654114808 | -0.90714814 | Up |
| ZNF32 | -0.913697949 | 6.45083375 | -4.268776921 | 0.000487490032336016 | 0.00761013408148394 | -0.21214936 | Down |
| PLRG1 | -0.912586923 | 8.415253125 | -3.557281003 | 0.00232936438708606 | 0.0211411587888687 | -1.734097958 | Down |
| GTDC1 | 0.912504615384615 | 7.31551 | 5.62487294773806 | 2.70591589918555e-05 | 0.00120505257288657 | 2.62878242661607 | Up |
| OMA1 | -0.912055128 | 7.506621875 | -3.51965795 | 0.00253013310856767 | 0.0223116959369606 | -1.8139532 | Down |
| SERGEF | -0.912011026 | 7.574104375 | -4.365059985 | 0.000394966635778662 | 0.00664549747652211 | -0.006130106 | Down |
| PAFAH2 | -0.91169641 | 7.11795 | -3.377394674 | 0.00345681315043128 | 0.0277151510481946 | -2.114667027 | Down |
| EMC2 | 0.911592051282049 | 8.120411875 | 4.14397130063605 | 0.000640846282641931 | 0.00908986603548718 | -0.479543579 | Up |
| PCED1A | 0.911532820512821 | 8.03229375 | 3.3420696033622 | 0.00373470237900644 | 0.0290342589551378 | -2.188986476 | Up |
| RNA5SP503 | -0.910675128 | 2.920023125 | -4.28514749 | 0.000470336660565208 | 0.00745445977388016 | -0.177100856 | Down |
| RN7SL192P | -0.910394359 | 5.10538125 | -4.706790228 | 0.000188064490523826 | 0.00410988969079881 | 0.721663929438514 | Down |
| CRK | -0.910135385 | 8.647375 | -5.654658144 | 2.5450522145991e-05 | 0.00117922368003074 | 2.68910213627932 | Down |
| IRF2BPL | -0.909564359 | 7.470385625 | -3.336106178 | 0.00378374116915633 | 0.0292418535297795 | -2.201517436 | Down |
| GTF3C3 | -0.908986154 | 7.56905875 | -4.583298254 | 0.000245654027255865 | 0.00484387344606806 | 0.45941683299972 | Down |
| CDX1 | -0.908833077 | 5.485183125 | -5.55322146 | 3.13718654173919e-05 | 0.00130335840870437 | 2.48322926288842 | Down |
| MIF | 0.908058205128206 | 8.905720625 | 3.65607949613504 | 0.00187440598232303 | 0.0182713426306996 | -1.523865468 | Up |
| MEGF9 | -0.907677179 | 8.831765625 | -3.178761177 | 0.00533314461637056 | 0.0369170185844219 | -2.530359487 | Down |
| ATL1 | 0.907520512820512 | 5.54370375 | 3.88658582320829 | 0.0011284569774039 | 0.0130655473285409 | -1.031213401 | Up |
| GEMIN4 | -0.907378718 | 6.492018125 | -3.984698373 | 0.000909344784281459 | 0.0113641280896772 | -0.82098823 | Down |
| SPCS1 | 0.906495128205131 | 9.756890625 | 4.30159630526725 | 0.000453715709989324 | 0.00731310653715158 | -0.14189242 | Up |
| VPS39 | 0.906269487179486 | 8.841670625 | 6.5462200036835 | 4.2858019724167e-06 | 0.000386514640263619 | 4.44015363400517 | Up |
| GYLTL1B | 0.906268461538463 | 7.321613125 | 3.26773341964628 | 0.00439339253482693 | 0.0323426404956447 | -2.344852635 | Up |
| PSMG2 | 0.905996153846155 | 9.332841875 | 4.58635666287577 | 0.000244030558817715 | 0.00482820053850974 | 0.465923307882789 | Up |
| METTL21C | -0.90523 | 3.087820625 | -4.916213944 | 0.000119915228357509 | 0.00306790804317065 | 1.1638639537688 | Down |
| PLXND1 | 0.90449 | 7.554978125 | 4.42305821113769 | 0.000348028888236806 | 0.00611698649554573 | 0.117810158976496 | Up |
| HIST1H2BN | 0.904476410256412 | 4.90879375 | 3.86635716806027 | 0.00117984063571117 | 0.0134796792630001 | -1.074530976 | Up |
| ZNF845 | -0.904092308 | 6.612465 | -3.462632791 | 0.00286761528103604 | 0.02433064495649 | -1.93474316 | Down |
| HOXA5 | -0.903879231 | 4.606808125 | -3.496488071 | 0.00266222373837091 | 0.0230920910570193 | -1.863068715 | Down |
| MIR193A | -0.903862051 | 5.32127875 | -3.830823538 | 0.00127584207088466 | 0.0141938191628204 | -1.150593008 | Down |
| VN1R4 | -0.903814103 | 2.477354375 | -3.321459429 | 0.00390689593269759 | 0.029894295306429 | -2.232275284 | Down |
| CSNK1G2 | 0.903574102564098 | 8.391640625 | 3.70445901441859 | 0.00168507732111993 | 0.0170460490986728 | -1.420678721 | Up |
| LYSMD1 | -0.903354359 | 5.55391125 | -4.039523671 | 0.000806077735822568 | 0.0105015392894447 | -0.703458559 | Down |
| HID1 | 0.90275153846154 | 6.901565625 | 4.42912199959267 | 0.000343459928949128 | 0.00605868639848446 | 0.130760186139872 | Up |
| TMEM241 | 0.902367948717949 | 5.956910625 | 4.94229625379593 | 0.000113412200652748 | 0.00294682069187691 | 1.21868484575213 | Up |
| TAC1 | -0.902212308 | 3.3124625 | -4.273648635 | 0.000482320281749089 | 0.00756489825486273 | -0.201718527 | Down |
| PHOSPHO2 | -0.901481795 | 5.864659375 | -4.812839969 | 0.000149666392780959 | 0.00357771755543161 | 0.946021037285053 | Down |
| RNA5SP193 | -0.901017436 | 2.86153 | -4.664756453 | 0.000205937584069168 | 0.00432413267738747 | 0.632513450757011 | Down |
| KIAA1279 | -0.900962564 | 7.69359125 | -3.874859454 | 0.0011579639456005 | 0.0133014616461857 | -1.056325582 | Down |
| ZW10 | -0.900952051 | 5.949003125 | -4.670532971 | 0.000203382361200054 | 0.00428311526969795 | 0.644772148260192 | Down |
| SLC38A9 | 0.900715384615386 | 6.72487125 | 5.10340693253873 | 8.04907999954849e-05 | 0.00242101423965868 | 1.55593457479483 | Up |
| PYROXD2 | 0.900572564102563 | 6.221231875 | 3.4373876891548 | 0.00303091523202195 | 0.0253559014044277 | -1.988113955 | Up |
| FAM188A | -0.900571795 | 7.28069875 | -4.418168607 | 0.000351757959609158 | 0.00616235257260432 | 0.107366593901873 | Down |
| SERP1 | 0.900551794871795 | 9.663535 | 3.793264356 | 0.0013858307149385 | 0.0149396653436964 | -1.230943093 | Up |
| GBAP1 | 0.900478205128206 | 5.468391875 | 3.51461611722775 | 0.00255831149061451 | 0.0224921033239353 | -1.824645076 | Up |
| KDELC1 | -0.900442821 | 4.684026875 | -5.026826255 | 9.47076537198425e-05 | 0.00264897544384632 | 1.39593377802246 | Down |
| CHAMP1 | 0.90037128205128 | 7.000135 | 4.67217579060628 | 0.000202661575676044 | 0.00427460031156703 | 0.648258065109122 | Up |
| DPM2 | 0.900352307692308 | 6.04034625 | 3.57866888032988 | 0.00222237201201099 | 0.020489250191432 | -1.688649132 | Up |
| SOCS5 | -0.899925128 | 7.2359475 | -3.873551183 | 0.00116130352258478 | 0.0133266869526753 | -1.059127031 | Down |
| FBXO28 | -0.899621795 | 7.698510625 | -5.696931883 | 2.33346343092561e-05 | 0.00111459858822607 | 2.77452287900501 | Down |
| FTH1P2 | 0.89903282051282 | 9.5169075 | 3.80244115683837 | 0.00135811137163288 | 0.0147088762726058 | -1.21131621 | Up |
| PFKP | 0.898622564102564 | 7.9781375 | 3.42559497304098 | 0.00311031881938319 | 0.0258531386317276 | -2.013021935 | Up |
| MRPL2 | -0.898385641 | 7.313625 | -3.296918125 | 0.00412216001072289 | 0.0309820004417666 | -2.28374809 | Down |
| COL4A3BP | -0.898101282 | 8.004129375 | -3.560535881 | 0.00231275771055037 | 0.0210478109956257 | -1.7271838 | Down |
| SSRP1 | -0.898080641 | 6.173347813 | -3.780568409 | 0.00142511525024582 | 0.0152014467448418 | -1.258090858 | Down |
| LEMD2 | -0.898026667 | 7.3365 | -5.687190699 | 2.3805574322836e-05 | 0.00112870479753341 | 2.75485918916528 | Down |
| MIR375 | -0.897981026 | 5.57926375 | -3.249325229 | 0.00457342191726199 | 0.0333661884944314 | -2.383331883 | Down |
| USB1 | 0.897655384615387 | 6.943775 | 3.60742691606277 | 0.00208617317254867 | 0.0196017617704788 | -1.627482455 | Up |
| RNF8 | -0.897447949 | 5.266796875 | -4.413639932 | 0.000355247889051887 | 0.00619012180671707 | 0.0976930089526125 | Down |
| KIAA2018 | 0.897353333333331 | 8.01901625 | 4.00513673986451 | 0.000869377478446299 | 0.0110627565307912 | -0.777176908 | Up |
| C11orf83 | -0.896748718 | 4.892735 | -5.355714543 | 4.73119863487864e-05 | 0.00171435304070129 | 2.07884301249287 | Down |
| MDM4 | 0.896607435897435 | 7.981836875 | 3.41027247217269 | 0.00321656997810482 | 0.0263788164953163 | -2.045362669 | Up |
| SVIP | 0.896432307692309 | 8.46170125 | 3.88990123971574 | 0.00112025193138181 | 0.0129899063506049 | -1.024112734 | Up |
| USP33 | -0.895768974 | 7.655394375 | -5.591638184 | 2.89781607506419e-05 | 0.00124405233514817 | 2.56134731034345 | Down |
| RALGDS | 0.89561205128205 | 7.532438125 | 3.43984956020934 | 0.00301459360682186 | 0.0252737889187759 | -1.982912235 | Up |
| BMPR1B | -0.895258974 | 3.61062875 | -4.869370599 | 0.000132566900122854 | 0.00325982713612723 | 1.06525952444224 | Down |
| SAC3D1 | -0.894667692 | 6.9793025 | -6.507382632 | 4.62142734539388e-06 | 0.000394548011498517 | 4.36617822179428 | Down |
| OGFOD1 | -0.894328205 | 7.815975 | -3.461078746 | 0.002877411147236 | 0.0243868442213198 | -1.938030474 | Down |
| PPP3CC | -0.894078462 | 7.95630125 | -3.145188223 | 0.00573677805564156 | 0.0386345927343262 | -2.60003124 | Down |
| TOE1 | 0.893672051282055 | 7.248741875 | 3.79218944754336 | 0.00138911437317395 | 0.0149609876125684 | -1.233241831 | Up |
| ZNF224 | -0.893650256 | 5.8490925 | -3.159759769 | 0.00555804320496333 | 0.037904382822607 | -2.569815096 | Down |
| KCNJ12 | -0.893353846 | 6.16 | -4.899060968 | 0.000124398366732362 | 0.00315147036242517 | 1.12777890674244 | Down |
| BRD4 | 0.893349487179487 | 7.612603125 | 4.69204368516841 | 0.000194147640163289 | 0.0041666657912392 | 0.690401455869729 | Up |
| TMEM104 | 0.893216923076924 | 6.49178875 | 4.37054723097418 | 0.000390263686641781 | 0.00661481145458202 | 0.00560164815825193 | Up |
| FRG1 | 0.893125897435897 | 6.345248125 | 4.54747879143233 | 0.000265505234259648 | 0.00512815378314692 | 0.383173682988928 | Up |
| EPDR1 | -0.89296641 | 7.162098125 | -5.068092074 | 8.67536926410751e-05 | 0.00251488596316609 | 1.48222126865994 | Down |
| RPL12P2 | -0.892801282 | 5.936585625 | -5.092985498 | 8.22893026254431e-05 | 0.00245257899781484 | 1.53419444352244 | Down |
| RHOG | 0.892653333333334 | 8.7893475 | 4.54736333953833 | 0.000265571785998127 | 0.00512815378314692 | 0.382927820487278 | Up |
| PLEKHF1 | -0.892511282 | 6.16433125 | -3.893922662 | 0.00111037988070322 | 0.0129011086139331 | -1.015499633 | Down |
| RCCD1 | -0.892174615 | 5.888188125 | -5.106846014 | 7.99061633271634e-05 | 0.00241552911629857 | 1.56310648194067 | Down |
| SIX6 | -0.892095641 | 5.594235625 | -4.462795263 | 0.000319171745992565 | 0.00576755994722292 | 0.202643760899099 | Down |
| KRTAP5-3 | -0.892055128 | 7.397981875 | -4.185162477 | 0.000585483635936364 | 0.00856076982607832 | -0.391261581 | Down |
| MBD5 | 0.891863333333333 | 7.243465625 | 4.3396402834543 | 0.000417513125695118 | 0.00691119709767475 | -0.060491865 | Up |
| SIK2 | -0.891842564 | 8.08602125 | -3.143347335 | 0.00575975490904188 | 0.0386866304510199 | -2.603846001 | Down |
| CD33 | 0.891774102564103 | 5.806343125 | 3.33607624150492 | 0.0037839889409111 | 0.0292418535297795 | -2.20158033 | Up |
| VAV2 | 0.89176717948718 | 7.0993375 | 3.71251709918412 | 0.00165545049091306 | 0.0168324371483218 | -1.403478714 | Up |
| ACTR10 | -0.891654872 | 7.76783375 | -4.881607035 | 0.000129136000983992 | 0.00321967506889744 | 1.09103493978101 | Down |
| ZNF701 | -0.891613846 | 5.90358375 | -4.112966142 | 0.000685976614688732 | 0.00943256765026092 | -0.5460071 | Down |
| UBBP4 | 0.891589487179488 | 10.67877313 | 5.13103670145357 | 7.59147534306448e-05 | 0.00234040364842333 | 1.61352080473072 | Up |
| ZNF512 | -0.891483333 | 8.157203125 | -4.905631246 | 0.000122661261881334 | 0.00311571293782042 | 1.14160391596155 | Down |
| FXR2 | -0.891402564 | 7.27767875 | -3.697156436 | 0.001712383079097 | 0.0172325183180111 | -1.436262967 | Down |
| C19orf25 | -0.89116 | 7.0486925 | -4.693729027 | 0.00019344239247822 | 0.0041666657912392 | 0.693975123196244 | Down |
| TACO1 | -0.891127179 | 6.4800725 | -3.671233567 | 0.00181292640034124 | 0.0178663321829824 | -1.491559223 | Down |
| NEK7 | -0.890967436 | 8.618945625 | -5.069957853 | 8.64106511032421e-05 | 0.00251432340232617 | 1.48611878262374 | Down |
| P2RX3 | -0.890414103 | 4.411281875 | -5.259722596 | 5.78638160067427e-05 | 0.00198036998482989 | 1.88069869098556 | Down |
| MIR152 | -0.890294103 | 4.466629375 | -5.587261821 | 2.92410902799892e-05 | 0.00124820895816064 | 2.5524573282098 | Down |
| CD58 | 0.889824358974357 | 7.001325625 | 3.40376293869907 | 0.00326278810583314 | 0.0266453407087081 | -2.059094219 | Up |
| BAK1P2 | -0.889805385 | 5.428433125 | -4.928908023 | 0.00011670398004682 | 0.00300738080176924 | 1.19055233906082 | Down |
| HAUS4 | -0.889365641 | 7.60027375 | -4.427121118 | 0.000344960797651645 | 0.00606792551763538 | 0.126487214677208 | Down |
| ZNF490 | 0.889156153846153 | 6.865269375 | 4.18283382102905 | 0.000588480697735559 | 0.00858305358080267 | -0.396251777 | Up |
| PPP1R7 | 0.88886205128205 | 8.73945375 | 5.63312420466323 | 2.66033152635596e-05 | 0.00120505257288657 | 2.64550355007751 | Up |
| FAM103A1 | 0.888507692307693 | 7.4158675 | 4.68731997007785 | 0.000196138307830125 | 0.00419125724032132 | 0.680384050882254 | Up |
| NTAN1 | -0.888367179 | 7.447565 | -3.896374452 | 0.00110440391686802 | 0.0128758374696198 | -1.010248181 | Down |
| TES | 0.887564102564099 | 9.6753425 | 4.04466649702097 | 0.000797017724072747 | 0.0104536252644702 | -0.69243294 | Up |
| RNU6-1280P | 0.887493846153847 | 3.52987875 | 2.98531066827984 | 0.00810635102052297 | 0.0485344104869554 | -2.928999673 | Up |
| ALG11 | 0.886937948717948 | 7.62210375 | 4.74746196539262 | 0.000172273241188921 | 0.00387619559855965 | 0.807807336819044 | Up |
| RPRD2 | 0.886825384615383 | 8.862485625 | 3.50525258586064 | 0.00261147199418359 | 0.0228173724533282 | -1.844495533 | Up |
| SPIN2B | -0.886573333 | 6.3935325 | -6.298979562 | 6.95014713174905e-06 | 0.000499788268131125 | 3.9655471600215 | Down |
| YARS | -0.886469744 | 7.74261 | -3.064129898 | 0.00683846648916045 | 0.0432169572838565 | -2.767430783 | Down |
| FGF22 | -0.885804103 | 5.7890275 | -5.319806913 | 5.10064008782522e-05 | 0.00180122149283246 | 2.00484232033889 | Down |
| XRCC1 | 0.885786923076927 | 8.400561875 | 3.36348409670228 | 0.00356371837225056 | 0.0282978163715505 | -2.143951361 | Up |
| TTYH3 | 0.885744871794873 | 7.194474375 | 3.60240793666777 | 0.00210933029562142 | 0.0197676562927416 | -1.638162026 | Up |
| MMADHC | -0.885658205 | 8.314179375 | -4.741254363 | 0.000174593148794864 | 0.00390522314679644 | 0.794667286085232 | Down |
| CECR5-AS1 | -0.885108205 | 5.13877625 | -4.621322137 | 0.000226227109390972 | 0.00457952318265254 | 0.54026869415096 | Down |
| CREBL2 | 0.884477692307693 | 8.610908125 | 4.83490827689181 | 0.000142738203931468 | 0.0034582113503438 | 0.992599895684288 | Up |
| C3orf17 | 0.884381538461535 | 8.02005 | 4.31082661178765 | 0.000444650309089507 | 0.00722696286886271 | -0.122138619 | Up |
| MGAT1 | -0.884352308 | 6.83116375 | -4.919108284 | 0.000119175185679947 | 0.00305904851612613 | 1.16995032945024 | Down |
| DCP1B | 0.88394153846154 | 7.4765425 | 3.30995808920258 | 0.0040063647072655 | 0.0303771972463996 | -2.256408165 | Up |
| HES6 | -0.883806154 | 5.7230475 | -5.068198082 | 8.67341647458703e-05 | 0.00251488596316609 | 1.48244272295013 | Down |
| LINC01405 | -0.883798462 | 5.51754375 | -4.755562421 | 0.000169293092083306 | 0.00384947716798597 | 0.824949840331567 | Down |
| PRKD2 | 0.883643846153848 | 7.492800625 | 3.0576085261046 | 0.00693557949220033 | 0.043594269478078 | -2.780845597 | Up |
| ANGPTL5 | -0.883623077 | 3.09274625 | -4.254621086 | 0.000502831952182235 | 0.00775099491369798 | -0.242461918 | Down |
| MRVI1 | -0.883246154 | 5.5868825 | -4.067576432 | 0.000757886496438218 | 0.010122670815178 | -0.643316128 | Down |
| GLOD4 | -0.88287359 | 6.934971875 | -3.71074188 | 0.00166193240131964 | 0.0168704958525944 | -1.407268231 | Down |
| IL1RL2 | -0.88270359 | 5.47911 | -3.290929619 | 0.00417643643378874 | 0.0312737777125292 | -2.296295996 | Down |
| PTGER4P2-CDK2AP2P2 | 0.882511025641024 | 5.566786875 | 5.08195833613393 | 8.42371694345268e-05 | 0.00248206789887549 | 1.51117908874811 | Up |
| CD99 | -0.882219231 | 9.053666875 | -3.409165735 | 0.00322438196452636 | 0.0264149983997244 | -2.047697614 | Down |
| SP2 | 0.88162564102564 | 6.8648675 | 3.80875336818945 | 0.00133936740003847 | 0.0146076911524083 | -1.19781404 | Up |
| ZNF624 | 0.880838205128204 | 5.838034375 | 4.75806204999145 | 0.000168384128142345 | 0.0038472968866414 | 0.83023867000231 | Up |
| PHGDH | 0.880759230769229 | 7.554386875 | 3.62913348763802 | 0.00198889930607444 | 0.0189747343948739 | -1.58127344 | Up |
| CALCOCO2 | -0.880693846 | 8.72603625 | -5.703530826 | 2.30210668970721e-05 | 0.00110629279622693 | 2.78783679483267 | Down |
| DHX57 | 0.880364615384617 | 6.44181625 | 5.6217727057947 | 2.72325038260778e-05 | 0.00120505257288657 | 2.62249762698614 | Up |
| KRT37 | -0.880286923 | 5.066546875 | -4.629818551 | 0.000222104097365244 | 0.00453290735314514 | 0.558322742218344 | Down |
| DLEU1 | -0.880194615 | 5.894381875 | -3.900714518 | 0.0010939044533115 | 0.0127843082974201 | -1.000951903 | Down |
| SEPT14 | 0.879983461538462 | 5.227836563 | 3.97435108114885 | 0.000930277826833975 | 0.0114930395658559 | -0.843166802 | Up |
| NBN | 0.879603076923076 | 7.9787475 | 3.68051289441574 | 0.00177627696794276 | 0.0176243879488471 | -1.471770028 | Up |
| ZNF280D | 0.879331282051282 | 8.31653 | 4.43504876091522 | 0.000339052975573248 | 0.00601393280189171 | 0.143416006177926 | Up |
| SDC3 | 0.87888282051282 | 6.939105625 | 4.10734243500844 | 0.000694499215546493 | 0.00950481104917329 | -0.558063034 | Up |
| NPEPL1 | 0.878730769230768 | 6.65668875 | 4.80987401310321 | 0.00015062333138222 | 0.00358588149594014 | 0.939757941699433 | Up |
| CALCOCO1 | -0.87871359 | 8.600521875 | -3.222519001 | 0.00484861655772323 | 0.0347380502714461 | -2.43927621 | Down |
| ADH5P4 | -0.878692821 | 6.21764875 | -4.355422342 | 0.000403366131818872 | 0.00674408496004479 | -0.026738129 | Down |
| RPRML | -0.878642564 | 7.09373625 | -5.493354377 | 3.55149849955328e-05 | 0.00141636026574222 | 2.36113810901814 | Down |
| SAT2 | -0.878404872 | 8.146919375 | -3.193287377 | 0.00516725260369098 | 0.0362727245784928 | -2.50015652 | Down |
| LOC100129572 | -0.878108205 | 4.18914375 | -4.67951428 | 0.000199473430525439 | 0.00423417781899491 | 0.663827460123769 | Down |
| PJA2 | -0.877938462 | 9.371235 | -4.55671812 | 0.000260233821006388 | 0.00507066225056755 | 0.402847015488259 | Down |
| WDR4 | -0.876702308 | 5.850889375 | -4.368941304 | 0.000391634177128733 | 0.00661481145458202 | 0.00216828653057366 | Down |
| RAB11FIP1 | 0.876120512820512 | 6.70896125 | 3.53645131513736 | 0.00243847938285745 | 0.0217945607207414 | -1.778324271 | Up |
| CENPB | -0.875897949 | 6.84759625 | -4.673203177 | 0.000202212132644046 | 0.00427285419359455 | 0.650437995577797 | Down |
| DDX23 | 0.875714871794871 | 7.957985 | 3.8206026815501 | 0.00130487730807465 | 0.0144147827565748 | -1.172463617 | Up |
| ZNF212 | -0.875675897 | 6.27008 | -5.252614562 | 5.873535725988e-05 | 0.00200552742490093 | 1.86598644866332 | Down |
| LOC100287290 | -0.875294615 | 4.074583125 | -5.068352631 | 8.67057031555748e-05 | 0.00251488596316609 | 1.4827655784164 | Down |
| DZIP3 | 0.875245897435899 | 7.238650625 | 4.42834434340599 | 0.000344042463593468 | 0.00605868639848446 | 0.129099488055902 | Up |
| RN7SL160P | -0.874647179 | 3.3506125 | -3.300098893 | 0.00409361435536583 | 0.0308071907589639 | -2.277081331 | Down |
| GIPC1 | -0.874019744 | 6.946415625 | -3.187205022 | 0.005236089356827 | 0.0365163179651606 | -2.512807146 | Down |
| PGM2 | 0.873356410256407 | 8.12974875 | 4.27793308778477 | 0.000477819537837769 | 0.00752977685489174 | -0.192545603 | Up |
| TOR1AIP2 | -0.873157692 | 8.123509375 | -4.386652634 | 0.00037678514569089 | 0.00645241101441408 | 0.0400284241623297 | Down |
| RANP1 | -0.873011795 | 8.64405125 | -4.059367814 | 0.00077167982088597 | 0.0102423357547775 | -0.66091471 | Down |
| FAM49B | 0.873011538461541 | 8.113571875 | 3.06649898162286 | 0.00680351670216434 | 0.0431266706625562 | -2.76255543 | Up |
| RN7SL178P | -0.872349231 | 5.63302625 | -4.774936282 | 0.000162376714658959 | 0.00376194243395264 | 0.865929681225015 | Down |
| KAT2B | -0.872071282 | 8.74786875 | -3.590248798 | 0.00216649701074235 | 0.0200849067853635 | -1.664026893 | Down |
| POT1 | 0.871786153846153 | 6.75695625 | 4.11716239150126 | 0.000679686016619852 | 0.00939133686335993 | -0.537011443 | Up |
| PIEZO1P1 | -0.871251282 | 6.027665 | -3.345133442 | 0.00370975193718159 | 0.0289271289394082 | -2.182546671 | Down |
| EFNA2 | -0.87122641 | 5.828431875 | -5.070139115 | 8.63773984332207e-05 | 0.00251432340232617 | 1.48649741086888 | Down |
| PHAX | 0.871175384615384 | 6.83184 | 4.63520314708002 | 0.000219530787080485 | 0.00449966798477154 | 0.569762103868732 | Up |
| RPL7AP8 | -0.871125769 | 6.552755313 | -6.089859862 | 1.05284175329126e-05 | 0.000670765418671972 | 3.55740407425097 | Down |
| GPR6 | -0.871004615 | 5.87039875 | -5.087412802 | 8.32678489451656e-05 | 0.00246597681749044 | 1.52256487219986 | Down |
| CRIP1 | 0.87085205128205 | 6.971120625 | 3.05588202831267 | 0.0069615139303138 | 0.043721909235738 | -2.784395723 | Up |
| EIF5AL1 | -0.870666325 | 10.0242058333333 | -3.228151461 | 0.00478947557306822 | 0.0344957685974972 | -2.427530322 | Down |
| IRX2 | -0.870532051 | 5.846189375 | -5.741138096 | 2.13150392923977e-05 | 0.00104367567392419 | 2.86360721694132 | Down |
| ZNF681 | 0.870364102564103 | 4.6109975 | 4.11064876165118 | 0.000689475712958549 | 0.0094471548747354 | -0.550975007 | Up |
| IL4I1 | 0.870337435897437 | 6.1656425 | 3.31786169736399 | 0.00393774630282937 | 0.0300219342754479 | -2.239826165 | Up |
| MLLT10 | 0.870162307692309 | 7.646546875 | 4.94903944494218 | 0.000111790316928162 | 0.00293081767901539 | 1.23284822668239 | Up |
| COX14 | -0.869981795 | 6.662663125 | -4.485064203 | 0.000304073468961999 | 0.00557030264157471 | 0.250152689197042 | Down |
| PDP1 | 0.869503076923077 | 8.31239125 | 3.95538789601752 | 0.0009699058799315 | 0.011773748095606 | -0.883809195 | Up |
| PSMA7 | -0.869493077 | 8.019196875 | -3.028525707 | 0.00738527942037977 | 0.0455005835185809 | -2.840569482 | Down |
| FAM20B | -0.869491282 | 7.910315 | -5.516150531 | 3.38747708740453e-05 | 0.00137657964567199 | 2.40767849209342 | Down |
| PRTFDC1 | 0.868138974358974 | 4.81289625 | 4.13890521582003 | 0.000648010389598806 | 0.0091202766608571 | -0.490402779 | Up |
| SMG7 | 0.866869999999998 | 8.445491875 | 6.27627481933213 | 7.2686635965226e-06 | 0.000513365886194401 | 3.92152866111835 | Up |
| SKA2 | 0.866847820512823 | 8.537242188 | 3.19623754148371 | 0.00513418464343715 | 0.0361348854811857 | -2.494018366 | Up |
| HBP1 | -0.866771026 | 8.587541875 | -3.800234568 | 0.00136472550213705 | 0.0147673367039134 | -1.216035858 | Down |
| HLCS | 0.866272820512817 | 6.84422 | 4.01764632061791 | 0.000845790975411921 | 0.0108790564370451 | -0.750359818 | Up |
| ACRBP | 0.865815641025643 | 6.304511875 | 3.24595760668585 | 0.00460713262590721 | 0.0334929632289518 | -2.390365979 | Up |
| ZBED5 | 0.86510025641026 | 8.049140625 | 3.91659526824384 | 0.0010563319312144 | 0.0124721014796423 | -0.966932143 | Up |
| TAF2 | 0.86501128205128 | 8.231155 | 5.00445046442631 | 9.93286501992652e-05 | 0.00271719818097919 | 1.34907833984358 | Up |
| CMAS | -0.864303333 | 7.657456875 | -4.337404876 | 0.000419557153517281 | 0.00691119709767475 | -0.065273526 | Down |
| ZC3H13 | 0.864237179487181 | 8.101569375 | 3.36516334715683 | 0.00355064180138851 | 0.0282468227230081 | -2.14041747 | Up |
| TLK1 | 0.864048205128206 | 9.0313225 | 5.67126832008314 | 2.45965259225279e-05 | 0.00114654245935271 | 2.72269234701193 | Up |
| PSMC6 | -0.863632436 | 7.249340313 | -4.681278935 | 0.000198714433962696 | 0.00422576397113918 | 0.667570821379929 | Down |
| PLEKHB2 | 0.863631794871795 | 8.7832375 | 3.9292146046028 | 0.0010274008561841 | 0.0122798111564527 | -0.939895132 | Up |
| FAM65C | -0.86341359 | 5.064673125 | -4.797726516 | 0.000154608174522206 | 0.00363251282619865 | 0.914099328471203 | Down |
| SLC16A1 | -0.862937949 | 5.14489625 | -3.454430005 | 0.00291969677735985 | 0.0246555698514225 | -1.952091953 | Down |
| BAP1 | 0.862752051282049 | 7.957239375 | 3.64999545807642 | 0.00189966924303824 | 0.0184078956024112 | -1.536831613 | Up |
| MIR128-2 | -0.862027692 | 3.3280525 | -3.557653746 | 0.00232745662673346 | 0.0211403084954313 | -1.733306204 | Down |
| MYBPH | -0.861959487 | 5.52211125 | -3.668891934 | 0.00182229336313222 | 0.0178877278643743 | -1.496552181 | Down |
| STK11 | -0.861895128 | 7.104916875 | -3.547485604 | 0.00238005936215826 | 0.0214592044695638 | -1.754900464 | Down |
| FGB | -0.861809231 | 3.44281 | -3.227152031 | 0.00479991767067485 | 0.0345176430578274 | -2.429614879 | Down |
| ZBTB40 | 0.861430769230771 | 7.2027325 | 3.64892346926455 | 0.00190415557149543 | 0.0184078956024112 | -1.539115958 | Up |
| ISG20L2 | 0.861406923076923 | 7.705763125 | 4.48763995888083 | 0.000302374525125713 | 0.00556670067701817 | 0.255646273918104 | Up |
| MORF4L2 | -0.861034103 | 8.010123125 | -3.344322082 | 0.00371634321104234 | 0.0289494689905628 | -2.184252162 | Down |
| RN7SL197P | -0.861023077 | 4.69386875 | -4.101857116 | 0.000702914870399179 | 0.0095806063651425 | -0.569822476 | Down |
| SAP130 | 0.860665128205126 | 8.54917375 | 4.98967741625134 | 0.00010250530714176 | 0.00277156750992228 | 1.31811775279053 | Up |
| C20orf166 | -0.860395641 | 5.661851875 | -4.901045554 | 0.000123871033671478 | 0.00314152576907631 | 1.13195521076826 | Down |
| RNA5SP415 | -0.860181795 | 6.278245625 | -3.764511314 | 0.00147639846095078 | 0.0155703253074117 | -1.292415826 | Down |
| TAS2R10 | 0.859881025641026 | 4.83455 | 3.67386971232271 | 0.00180243874824863 | 0.0178248346975252 | -1.485937884 | Up |
| PKIG | -0.859865385 | 6.878549375 | -4.085008807 | 0.000729411653221878 | 0.0098610193745025 | -0.605942797 | Down |
| PLAGL1 | 0.859819230769233 | 6.907043125 | 3.1899076951144 | 0.00520539169222484 | 0.0363908863531653 | -2.50718662 | Up |
| KBTBD11 | -0.859428974 | 4.782900625 | -3.045966636 | 0.00711229764487179 | 0.0443818798417742 | -2.804773114 | Down |
| CEACAM1 | 0.859264871794871 | 5.349719375 | 3.7211571362301 | 0.00162426129058512 | 0.0165967347702395 | -1.385032603 | Up |
| MAD2L1BP | 0.859064358974362 | 7.285563125 | 3.60818974720128 | 0.0020826757500818 | 0.0195808486111966 | -1.625859112 | Up |
| RNU6-858P | 0.858804102564103 | 4.521945 | 3.60175194386133 | 0.00211237582289696 | 0.0197804693502616 | -1.639557734 | Up |
| HAUS2 | 0.858668205128208 | 6.32594125 | 3.88222194519339 | 0.00113934868019762 | 0.0131589691225797 | -1.040559135 | Up |
| MECOM | -0.858594359 | 4.67848375 | -3.42236478 | 0.00313242533491107 | 0.0259550707842258 | -2.019841957 | Down |
| ELOVL1 | 0.857868205128206 | 9.13040125 | 3.25271118169279 | 0.00453977216277704 | 0.0331584048253978 | -2.376257817 | Up |
| COQ9 | -0.857784359 | 8.613836875 | -3.084363725 | 0.00654552096405936 | 0.0419918681831356 | -2.725757158 | Down |
| KMT2E | 0.857713333333331 | 9.39081875 | 4.15001663408469 | 0.000632401814551251 | 0.0090144434635111 | -0.466585711 | Up |
| LAMB2 | -0.857314615 | 8.533571875 | -3.677073388 | 0.00178977461444993 | 0.017735661963854 | -1.479105768 | Down |
| RNU6-431P | 0.857065384615384 | 5.639745625 | 3.27863875176702 | 0.00429004682020929 | 0.0318433507129357 | -2.322033903 | Up |
| SUCLA2 | -0.857051026 | 8.433019375 | -3.728709589 | 0.00159747893611045 | 0.0163947342861851 | -1.368905196 | Down |
| SULT2A1 | -0.856887692 | 3.02566875 | -3.698405321 | 0.00170768216322327 | 0.0172075002932317 | -1.433597968 | Down |
| NOL10 | 0.856720256410258 | 7.288591875 | 5.90291542185196 | 1.53365796073542e-05 | 0.000839083711053063 | 3.187473999 | Up |
| FGD4 | -0.856681282 | 6.677493125 | -2.970396842 | 0.00837073420968653 | 0.0495659403585516 | -2.959426832 | Down |
| C7orf31 | 0.856661282051283 | 6.512840625 | 3.66752084423972 | 0.00182780034870567 | 0.0179295213498666 | -1.499475535 | Up |
| TMEM180 | 0.856581025641025 | 6.88047875 | 3.89420415932578 | 0.00110969211885367 | 0.0129011086139331 | -1.014896706 | Up |
| RN7SL241P | -0.856147692 | 6.1117 | -3.687068666 | 0.00175083063091211 | 0.0174573060576057 | -1.457785993 | Down |
| FOXD2 | -0.855966923 | 5.074146875 | -5.866097328 | 1.65247734990985e-05 | 0.00088742602751956 | 3.11406704349615 | Down |
| RPS2P7 | -0.855786154 | 9.46957375 | -3.028370465 | 0.00738775447817118 | 0.0455038038115052 | -2.840887835 | Down |
| MRPL22 | -0.855309744 | 6.0140175 | -4.396163899 | 0.000369047666234376 | 0.00635258047040222 | 0.0603548341993916 | Down |
| MXI1 | -0.855078462 | 7.47055875 | -4.326579267 | 0.000429600166461519 | 0.00703632542496038 | -0.088432491 | Down |
| RN7SL68P | 0.854818974358975 | 4.67746375 | 3.61428154702598 | 0.00205495462884862 | 0.0193984720674665 | -1.612893938 | Up |
| SNRPA | 0.854674102564102 | 8.715879375 | 4.13554313496258 | 0.000652809334743314 | 0.00916298540909165 | -0.497609574 | Up |
| HIST2H2BC | 0.854256923076925 | 9.98407375 | 3.55474375453315 | 0.00234239176553408 | 0.0212428501475886 | -1.739487085 | Up |
| HPRT1 | -0.854081538 | 7.14206875 | -4.916458436 | 0.000119852534229083 | 0.00306790804317065 | 1.16437811154326 | Down |
| PID1 | -0.853966667 | 5.16780875 | -3.357673373 | 0.00360933521275436 | 0.0284872251282309 | -2.156177051 | Down |
| SPRYD7 | -0.853956154 | 7.351910625 | -4.500799333 | 0.0002938438669494 | 0.00549040756306294 | 0.283707429698461 | Down |
| PBLD | 0.853902564102563 | 5.0609225 | 3.40284645036949 | 0.00326934773427827 | 0.0266760720667126 | -2.061027123 | Up |
| DSEL | -0.853607949 | 5.043866875 | -4.153468929 | 0.000627629879790825 | 0.00898536216725108 | -0.459186077 | Down |
| COLCA1 | 0.853569743589743 | 5.70376875 | 4.50824600449802 | 0.000289125150169431 | 0.00543000795729164 | 0.299582838358783 | Up |
| CACYBP | -0.853362051 | 7.60986 | -3.238280088 | 0.00468490196792286 | 0.0339629891652809 | -2.406396048 | Down |
| WDR48 | -0.853295385 | 7.9595575 | -3.497867637 | 0.00265417086091204 | 0.0230393892943303 | -1.86014571 | Down |
| NDUFC1 | -0.853278205 | 7.714188125 | -4.683954484 | 0.000197569255765359 | 0.00421294294979252 | 0.67324605581124 | Down |
| CCDC97 | 0.852881282051283 | 8.034319375 | 5.13380804140437 | 7.54707113865004e-05 | 0.00233288576960897 | 1.6192926434598 | Up |
| CCT4 | -0.852779487 | 8.76831 | -3.834703245 | 0.00126499078594297 | 0.0140865457467619 | -1.142290244 | Down |
| PCNXL3 | 0.852524102564103 | 7.6882525 | 3.83214707618764 | 0.00127212978872439 | 0.0141592784077361 | -1.147760629 | Up |
| RSU1 | 0.852247692307692 | 8.98165125 | 5.08375382267922 | 8.39168225751133e-05 | 0.00247575871361793 | 1.51492735187977 | Up |
| NOP9 | -0.852207692 | 6.38973125 | -3.952154674 | 0.000976829682096962 | 0.011820856386622 | -0.890738194 | Down |
| SLC25A44 | 0.851939743589744 | 6.718124375 | 4.77020642357557 | 0.000164038223411969 | 0.00378538502283441 | 0.855927632943508 | Up |
| TMEM14B | 0.851312307692305 | 10.44337125 | 3.35956304096384 | 0.00359443757758182 | 0.0284563711347485 | -2.152201667 | Up |
| RPL18A | 0.851192051282052 | 10.88524688 | 5.69536711499942 | 2.34096317243205e-05 | 0.00111576336727758 | 2.7713650232062 | Up |
| LGMN | 0.850944871794873 | 10.36339938 | 3.04093356621135 | 0.0071900487562569 | 0.0447114371296904 | -2.815109347 | Up |
| ALKBH6 | 0.850896410256412 | 7.48626 | 4.58694690052653 | 0.000243718505711547 | 0.00482612337520732 | 0.467178918170271 | Up |
| C2CD3 | 0.850797948717951 | 6.79644 | 4.86928312397831 | 0.000132591758915717 | 0.00325982713612723 | 1.0650752168845 | Up |
| C8orf59 | 0.850687692307689 | 6.60299375 | 4.12921362070127 | 0.000661941353777892 | 0.00923271521992898 | -0.511177508 | Up |
| PUS7L | 0.850387435897437 | 6.899633125 | 3.12434836504321 | 0.00600221104348168 | 0.0397876941952296 | -2.64318208 | Up |
| SALL3 | -0.849784103 | 5.74074375 | -5.733884794 | 2.16336373239053e-05 | 0.0010548119445103 | 2.84900740020949 | Down |
| OASL | 0.849659743589743 | 5.301661875 | 5.32209948069111 | 5.07619095072966e-05 | 0.0017956889368073 | 2.00957127727343 | Up |
| AASS | -0.849594615 | 7.358124375 | -3.729207305 | 0.00159572951096666 | 0.0163947342861851 | -1.367842276 | Down |
| HLA-B | 0.849306410256411 | 12.33107813 | 3.34567598211872 | 0.00370535091205989 | 0.0289218398216275 | -2.181406196 | Up |
| C7orf25 | -0.849013077 | 5.462056875 | -3.255990768 | 0.00450741154588107 | 0.0329931530015765 | -2.369404374 | Down |
| SOX7 | -0.848472564 | 5.907979375 | -3.69912716 | 0.00170497096772497 | 0.0171876117408157 | -1.432057592 | Down |
| MIR187 | -0.848398974 | 5.3723825 | -3.770183716 | 0.00145807455526959 | 0.0154399562288362 | -1.280291339 | Down |
| SNCB | -0.848378718 | 5.064295625 | -3.99331236 | 0.000892279731290931 | 0.01124554420982 | -0.802523937 | Down |
| QSER1 | 0.84737717948718 | 8.319520625 | 3.96530841758974 | 0.000948967586435217 | 0.0116531019689387 | -0.862547904 | Up |
| POLR2G | 0.846621794871796 | 7.211586875 | 3.61654356198758 | 0.00204475493337651 | 0.019319016728212 | -1.60807901 | Up |
| KCNT1 | -0.846540769 | 4.945215625 | -5.299500583 | 5.3225433632188e-05 | 0.00185429773044156 | 1.96293042889351 | Down |
| LRCH1 | 0.846222564102564 | 7.0287525 | 3.05882523414828 | 0.00691735942368324 | 0.0435032099535308 | -2.778343385 | Up |
| GRB7 | -0.846051282 | 5.89867 | -3.487745659 | 0.00271382156894841 | 0.0234263108546225 | -1.881587822 | Down |
| PLK5 | -0.845730256 | 5.4804775 | -5.989082029 | 1.28879397741123e-05 | 0.000776173675233168 | 3.35856709725976 | Down |
| COX15 | 0.845506666666666 | 7.4853475 | 3.72569114915318 | 0.00160812956696648 | 0.0164924143358568 | -1.37535109 | Up |
| DERA | -0.845352308 | 7.17226125 | -3.590077771 | 0.0021673119906118 | 0.0200849067853635 | -1.66439062 | Down |
| ACTL10 | -0.845256154 | 5.660609375 | -6.493361575 | 4.74918592215196e-06 | 0.000403975460903634 | 4.33941848345805 | Down |
| ACSL3 | -0.84519641 | 7.93485125 | -3.320585945 | 0.00391436404966978 | 0.0299139224917357 | -2.2341087 | Down |
| RN7SL215P | -0.844635641 | 4.067136875 | -4.233890941 | 0.000526184098464478 | 0.0079738444622312 | -0.286861122 | Down |
| CASR | -0.843483333 | 4.328263125 | -5.868053071 | 1.64593309141447e-05 | 0.00088742602751956 | 3.11797084437575 | Down |
| PDXDC2P | 0.843050769230771 | 8.13550875 | 3.41647063746749 | 0.00317316438054569 | 0.0261609275618601 | -2.032283519 | Up |
| RNA5SP463 | 0.842803846153846 | 4.166628125 | 3.33338268330903 | 0.00380634786044855 | 0.0293562374531682 | -2.207238812 | Up |
| NPFF | -0.841295128 | 4.803164375 | -4.470514523 | 0.000313853841189957 | 0.00569260037090609 | 0.219114889340259 | Down |
| SIRT4 | -0.841134615 | 4.427188125 | -3.719507755 | 0.00163016966737428 | 0.0166422971692915 | -1.388554271 | Down |
| MICB | 0.840557692307692 | 6.687533125 | 3.38751602751284 | 0.0033810252311388 | 0.0273237014778613 | -2.093345201 | Up |
| BTG3 | -0.840548718 | 7.3375875 | -3.885478623 | 0.00113121049264208 | 0.0130909250009975 | -1.033584642 | Down |
| ZNF622 | -0.840244872 | 6.558804375 | -3.918261765 | 0.00105246496816847 | 0.0124579994987823 | -0.963361851 | Down |
| MIPEP | -0.840205641 | 6.03091625 | -5.035045112 | 9.30660378258477e-05 | 0.00261967408648192 | 1.41313246564365 | Down |
| NT5C1A | -0.83999 | 4.939068125 | -4.236667134 | 0.000522994305987804 | 0.00795135570101614 | -0.280914584 | Down |
| USP30 | 0.839794871794874 | 8.04081 | 3.99061958065606 | 0.000897579496398136 | 0.0112714899367195 | -0.80829606 | Up |
| KPNA1 | -0.839636667 | 7.939181875 | -3.898902942 | 0.00109827478109554 | 0.0128115567182151 | -1.004832293 | Down |
| RBM25 | 0.839581025641023 | 8.41538625 | 4.41073086472335 | 0.000357508192773454 | 0.00621735677488887 | 0.0914785667549554 | Up |
| UBE2H | -0.839500769 | 9.146305625 | -5.155146026 | 7.21396599898083e-05 | 0.00226472844723962 | 1.6637070310918 | Down |
| PSMA6 | -0.839380769 | 8.798043125 | -3.334013567 | 0.00380109931620639 | 0.0293351727691464 | -2.20591357 | Down |
| TET2 | 0.839180256410255 | 7.527290625 | 4.476759412 | 0.000309617482423759 | 0.00564210685132959 | 0.23243794152958 | Up |
| NKX2-8 | -0.839144359 | 5.073621875 | -6.257901639 | 7.53745007356397e-06 | 0.000526509789039861 | 3.88585498517531 | Down |
| RNA5SP421 | -0.838968718 | 7.81744125 | -3.149268041 | 0.00568617546380435 | 0.038378381939547 | -2.591574807 | Down |
| SAMD1 | -0.838940769 | 6.404440625 | -4.622706834 | 0.00022554989270078 | 0.00457518829345264 | 0.543211350589115 | Down |
| MRPL35 | 0.838225641025644 | 6.978235 | 3.85585325967885 | 0.00120744026900667 | 0.0136876509483164 | -1.097019406 | Up |
| LSM5 | 0.83813205128205 | 6.239005625 | 4.12002267335492 | 0.000675431515669076 | 0.00936458170700577 | -0.530879821 | Up |
| NCBP2-AS2 | 0.838076666666666 | 5.907330625 | 3.31455670780899 | 0.00396629790093374 | 0.0301606868440661 | -2.246761138 | Up |
| ATG4B | -0.838035385 | 6.43783125 | -3.803748103 | 0.00135420900208295 | 0.0147088762726058 | -1.208520707 | Down |
| STAG1 | -0.837841282 | 7.559430625 | -3.208530165 | 0.0049986186638456 | 0.0354111869903493 | -2.468427283 | Down |
| RBMS1P1 | 0.837538717948719 | 6.917896875 | 2.96986824826022 | 0.00838025682425094 | 0.0495659403585516 | -2.960504392 | Up |
| ALAD | 0.837124871794871 | 6.729670625 | 4.32961946274122 | 0.000426755428643074 | 0.00700449913759445 | -0.081928278 | Up |
| RN7SL515P | -0.836768462 | 3.433675625 | -4.052029383 | 0.000784224727974239 | 0.0103440439925838 | -0.676647654 | Down |
| CPPED1 | 0.836671794871794 | 7.9444825 | 4.25207336381745 | 0.000505644524663702 | 0.00777378425879744 | -0.247918008 | Up |
| HCG4 | -0.836378462 | 6.1584225 | -3.033887891 | 0.00730028310334352 | 0.0451359277674287 | -2.829570384 | Down |
| RAPSN | -0.836244103 | 5.089495 | -4.746501412 | 0.000172630155374133 | 0.00387619559855965 | 0.805774252939218 | Down |
| PET117 | -0.836232308 | 6.21106125 | -5.286029957 | 5.47519009833433e-05 | 0.00189052230550931 | 1.93510232115318 | Down |
| PROSP | -0.836165128 | 3.7647525 | -3.235613942 | 0.00471220923597344 | 0.0341251404844892 | -2.411960698 | Down |
| SMCR8 | 0.835061538461536 | 7.4081775 | 4.02930432045145 | 0.000824389639300762 | 0.0106626244856731 | -0.72536737 | Up |
| SKP2 | 0.834708717948716 | 7.0655375 | 3.00686936232506 | 0.00773846383655704 | 0.0470380757108894 | -2.884932624 | Up |
| PAPD4 | 0.834634102564102 | 8.644796875 | 4.74137537699688 | 0.000174547620616285 | 0.00390522314679644 | 0.794923471269949 | Up |
| MAST4 | 0.834272564102564 | 6.492433125 | 5.27926032697702 | 5.5535906019668e-05 | 0.00191192815598287 | 1.92110989638715 | Up |
| DACT3 | -0.833917692 | 6.227201875 | -6.030038994 | 1.18692336538875e-05 | 0.000737696610056419 | 3.4395422852441 | Down |
| PIGU | 0.833910256410259 | 7.59484875 | 3.64058717481376 | 0.00193940544126842 | 0.0186322022339832 | -1.556877515 | Up |
| HMGCS1 | 0.833838461538462 | 7.34766375 | 4.338487809 | 0.000418565671107179 | 0.00691119709767475 | -0.06295705 | Up |
| TSPYL2 | 0.8337758974359 | 7.22425625 | 4.13112865939315 | 0.000659164892406938 | 0.00919949469899911 | -0.507072397 | Up |
| ELN | -0.833532308 | 6.987225 | -4.475086292 | 0.000310746758212171 | 0.00564943423841737 | 0.22886863938695 | Down |
| CBLN3 | 0.833410000000001 | 5.892475625 | 3.21929774464996 | 0.00488276152583186 | 0.0348659690203931 | -2.445991609 | Up |
| EXOSC10 | 0.833343076923077 | 8.98471125 | 3.86313229668362 | 0.00118824625919017 | 0.0135557785428024 | -1.081435641 | Up |
| DNAJA2 | -0.833063077 | 7.94036625 | -4.207403648 | 0.000557623316415581 | 0.00826751058250505 | -0.343604424 | Down |
| CES2 | 0.832626666666666 | 7.7841925 | 3.06294326573015 | 0.00685603798581099 | 0.0432798099496437 | -2.769872359 | Up |
| ZCCHC7 | 0.831919743589746 | 6.972238125 | 3.90096295249589 | 0.00109330647857738 | 0.0127843082974201 | -1.00041975 | Up |
| A4GALT | -0.831914615 | 6.434769375 | -3.524992057 | 0.00250065644168629 | 0.0221439208534887 | -1.802639025 | Down |
| MN1 | -0.831863846 | 5.768170625 | -3.619010845 | 0.00203368710214854 | 0.0192444763661291 | -1.602826731 | Down |
| MID1 | 0.830765641025642 | 7.35984375 | 3.70133698130034 | 0.00169669764410891 | 0.0171393950212805 | -1.42734174 | Up |
| PXMP2 | -0.830411538 | 7.217370625 | -4.295897366 | 0.00045940595184808 | 0.00737361591906568 | -0.154090017 | Down |
| ANGPT2 | -0.830292564 | 6.351120625 | -3.712903665 | 0.00165404236001624 | 0.016827047265342 | -1.402653499 | Down |
| PIWIL2 | -0.829964615 | 3.68886375 | -3.131812612 | 0.00590578784477647 | 0.0393274849423444 | -2.627735377 | Down |
| PIM3 | -0.829112821 | 6.8010425 | -3.758758892 | 0.00149521589463702 | 0.0156765617887113 | -1.304709853 | Down |
| CCP110 | 0.828872820512821 | 6.0868025 | 4.49714804694401 | 0.000296186057330382 | 0.00550934432418134 | 0.275922280872188 | Up |
| KDM1A | -0.828547949 | 8.147818125 | -4.883093946 | 0.000128725317152934 | 0.00321967506889744 | 1.09416618365529 | Down |
| NDUFB9 | -0.828425641 | 8.8208675 | -3.783657622 | 0.00141545510489025 | 0.0151462249182836 | -1.251485812 | Down |
| RN7SL217P | -0.828249744 | 3.86097375 | -5.566728192 | 3.05079098015612e-05 | 0.00127886304630393 | 2.51071484016912 | Down |
| TCF15 | -0.828056154 | 6.535264375 | -5.920881217 | 1.4789134987137e-05 | 0.000826595609460919 | 3.22322867182775 | Down |
| PTPLA | -0.827965128 | 5.551995 | -4.833731847 | 0.000143099145831589 | 0.0034633559625097 | 0.990117827749924 | Down |
| NACC1 | 0.827667692307693 | 7.43504 | 3.33941730499689 | 0.0037564350371718 | 0.0291351851618513 | -2.194560315 | Up |
| POLE4 | -0.827434872 | 7.0958125 | -3.361722861 | 0.00357748444508905 | 0.0283703402387514 | -2.147657415 | Down |
| CNOT2 | 0.827414358974362 | 8.8928175 | 5.73287796974643 | 2.16782477976759e-05 | 0.0010548119445103 | 2.84698028226245 | Up |
| CTDSPL2 | 0.827396666666667 | 8.441403125 | 4.18204958678746 | 0.000589493515772387 | 0.00859244863796562 | -0.397932372 | Up |
| ENDOG | -0.827142308 | 6.456246875 | -4.837391453 | 0.00014197938355798 | 0.00344340633983958 | 0.997838611092374 | Down |
| CYB561D2 | 0.827079487179486 | 6.36240875 | 3.81297784949441 | 0.00132696769008089 | 0.0145243859603995 | -1.188776786 | Up |
| EIF4G1 | -0.826853333 | 8.349385 | -3.853941241 | 0.00121253335320794 | 0.0137105869952558 | -1.101112599 | Down |
| SUPT5H | 0.826443589743591 | 7.63585875 | 4.05243551594961 | 0.000783525117244728 | 0.0103432394254247 | -0.675776944 | Up |
| RPS4XP21 | -0.826360256 | 4.075795625 | -3.392704477 | 0.00334281328308446 | 0.0270994605874259 | -2.082410464 | Down |
| C1D | -0.826106667 | 7.78287 | -3.114332165 | 0.00613402252036457 | 0.0403446270601647 | -2.663894369 | Down |
| MAPT-AS1 | -0.826025128 | 4.51793125 | -5.686763772 | 2.38264367094193e-05 | 0.00112870479753341 | 2.75399711496513 | Down |
| ZAR1 | -0.825733077 | 5.997711875 | -5.858195444 | 1.67919286358318e-05 | 0.000896318408532845 | 3.09828921325423 | Down |
| SLC12A2 | -0.825652564 | 7.818070625 | -3.930019813 | 0.00102558205362405 | 0.0122643616848721 | -0.938169859 | Down |
| RNA5SP345 | 0.825407948717948 | 5.058290625 | 3.87562504939551 | 0.00115601410343755 | 0.0132961648477582 | -1.054686162 | Up |
| BRIX1 | -0.825338205 | 6.898619375 | -3.964733572 | 0.000950168373172655 | 0.0116563183213946 | -0.863779931 | Down |
| PSMA4 | -0.825185128 | 8.95865375 | -3.90618874 | 0.00108080387582578 | 0.0126967217408627 | -0.989225662 | Down |
| FRS3 | 0.82506641025641 | 6.581223125 | 3.21757472299155 | 0.00490112215337754 | 0.0349435466591527 | -2.449582961 | Up |
| PFN3 | -0.824826154 | 5.71020875 | -4.980577765 | 0.000104513514352342 | 0.00280387249217961 | 1.29903720309384 | Down |
| SDF4 | 0.824803076923076 | 7.7739425 | 3.68469605388644 | 0.00175999771700112 | 0.0175225402777211 | -1.462847277 | Up |
| CYP26C1 | -0.824552308 | 5.49799125 | -5.026423149 | 9.4788926939024e-05 | 0.00264897544384632 | 1.39509007926443 | Down |
| CHDH | -0.824418205 | 5.591886875 | -3.000194878 | 0.00785058985306902 | 0.0475256357676571 | -2.898585966 | Down |
| HIST1H1T | -0.824238462 | 3.18141625 | -4.338014894 | 0.000418998357511869 | 0.00691119709767475 | -0.063968646 | Down |
| RNY4P29 | 0.823759230769233 | 4.610364375 | 3.97662537629434 | 0.000925635696345963 | 0.0114930395658559 | -0.838292148 | Up |
| OAT | -0.823684103 | 8.58837 | -3.658618402 | 0.00186396272092984 | 0.0182152533067974 | -1.51845391 | Down |
| PRPS2 | 0.823626410256412 | 8.016463125 | 4.29194691822042 | 0.000463392677647671 | 0.00739491095100411 | -0.162545832 | Up |
| ZNF195 | 0.823525128205128 | 7.0272675 | 4.04224878695826 | 0.00080126412267078 | 0.010464707242748 | -0.697616238 | Up |
| ZMIZ2 | 0.82316205128205 | 8.0980725 | 4.11345928632773 | 0.000685234310520303 | 0.00943256765026092 | -0.544949922 | Up |
| RNY4P3 | 0.822598205128205 | 5.930174375 | 2.97312595883614 | 0.00832173609162312 | 0.0493523417525344 | -2.953862454 | Up |
| KIAA0825 | 0.822582820512819 | 5.970561875 | 3.10514812355703 | 0.00625736673908141 | 0.040869570971443 | -2.682870066 | Up |
| MEMO1 | -0.822552436 | 6.974822813 | -4.114770698 | 0.000683264246037311 | 0.00942759731885006 | -0.542138591 | Down |
| SV2A | 0.822076153846155 | 5.590356875 | 3.10362843843159 | 0.00627800887515466 | 0.0409634806420016 | -2.686008508 | Up |
| ANP32B | 0.821819743589742 | 8.678361875 | 4.1313410775738 | 0.000658857648456681 | 0.00919949469899911 | -0.506617055 | Up |
| FLJ36848 | -0.821592564 | 5.143899375 | -4.200536357 | 0.000566079754447763 | 0.00837690211867556 | -0.358318352 | Down |
| NUDCD1 | -0.821554359 | 6.66588375 | -3.837125659 | 0.00125826236250005 | 0.0140451728365846 | -1.137105899 | Down |
| FUBP3 | 0.821545897435895 | 8.361769375 | 3.07635296355841 | 0.00666000654855696 | 0.0424924096981158 | -2.742265384 | Up |
| CCDC170 | 0.821315384615384 | 5.90590875 | 3.44821618238111 | 0.00295977233863236 | 0.024903759529424 | -1.965229505 | Up |
| ZNF780B | -0.821050513 | 7.568313125 | -5.165221634 | 7.06194819830602e-05 | 0.00223696561503502 | 1.6846630137109 | Down |
| RCN3 | -0.820870769 | 5.5872425 | -4.254882819 | 0.000502543908514006 | 0.00775099491369798 | -0.241901413 | Down |
| C15orf48 | 0.820507179487179 | 4.76836875 | 3.21577756737795 | 0.00492034496462332 | 0.0350591501346609 | -2.453328343 | Up |
| CAPRIN2 | 0.819916153846155 | 6.061901875 | 4.48561545601088 | 0.00030370905513401 | 0.00557030264157471 | 0.251328431381273 | Up |
| ZNF597 | 0.819712820512821 | 6.28442 | 4.18665598977103 | 0.000583569544984559 | 0.00853813897360648 | -0.388061101 | Up |
| RARB | 0.819428205128205 | 6.92095875 | 2.97885186978676 | 0.00821983758527188 | 0.0489848515980393 | -2.942182735 | Up |
| ZNF302 | -0.819418205 | 7.786009375 | -4.782027151 | 0.000159917900541911 | 0.00371458514962104 | 0.880921281418924 | Down |
| MFSD9 | 0.819323076923075 | 5.36979 | 3.93448190951638 | 0.00101556149256509 | 0.0121695073044805 | -0.928608967 | Up |
| LPPR3 | -0.818893077 | 5.320329375 | -5.913889225 | 1.49997550166559e-05 | 0.000828958901555419 | 3.20931863026464 | Down |
| IL1R1 | -0.818874359 | 8.82295125 | -4.50888671 | 0.000288722766921698 | 0.00543000795729164 | 0.300948610551654 | Down |
| ZYG11B | -0.818037436 | 8.40969125 | -3.724454971 | 0.00161251188152157 | 0.0165271831234051 | -1.377990817 | Down |
| SSR2 | 0.818002564102562 | 11.14709375 | 5.00106340626336 | 0.000100047965329796 | 0.00272873210748579 | 1.34198169837647 | Up |
| ZNF747 | -0.817849487 | 6.884320625 | -5.191689338 | 6.67804994943994e-05 | 0.00216474701212235 | 1.73966274560283 | Down |
| SH2B3 | 0.81739846153846 | 7.11307625 | 3.39579481608792 | 0.00332025660985654 | 0.026954099897571 | -2.075896043 | Up |
| MYOZ3 | -0.817215128 | 5.575359375 | -4.227631575 | 0.000533448286812779 | 0.00803170492296216 | -0.300269153 | Down |
| EXTL3 | -0.816839744 | 6.305354375 | -4.187312247 | 0.000582730481911397 | 0.00853813897360648 | -0.386654805 | Down |
| MLST8 | 0.816379230769233 | 7.868158125 | 3.99655328399783 | 0.000885942828877822 | 0.0111977378647683 | -0.795576742 | Up |
| SMARCD1 | 0.816376410256409 | 7.7907425 | 3.45920292073954 | 0.00288927949654153 | 0.0244607472669428 | -1.941998131 | Up |
| ZNF480 | 0.815814871794872 | 7.83926625 | 4.9116527580929 | 0.00012109099899099 | 0.00308782047427025 | 1.15427097143576 | Up |
| TRA2A | 0.815763717948719 | 8.464179688 | 3.34683141421181 | 0.00369599533867053 | 0.0288847405103803 | -2.178977236 | Up |
| ARHGDIA | 0.815696025641024 | 8.866694688 | 4.37468202825287 | 0.000386757379054499 | 0.00657487544392649 | 0.0144411109263913 | Up |
| ATP6AP1 | 0.815648205128209 | 9.5852075 | 3.13688259239706 | 0.00584115959775217 | 0.0390533295309265 | -2.617237869 | Up |
| DBNDD2 | -0.815610256 | 6.97138 | -4.249627766 | 0.000508359309544439 | 0.0077898293409285 | -0.253155539 | Down |
| PDLIM5 | -0.815586923 | 8.418045625 | -3.491590079 | 0.00269101075150049 | 0.0232552419670826 | -1.873445063 | Down |
| PPARD | 0.815240512820513 | 8.12368625 | 3.09178113094279 | 0.0064412295388888 | 0.0415285579150432 | -2.710461013 | Up |
| MSL3P1 | 0.815224358974359 | 6.067483125 | 2.9712444911717 | 0.00835548573938931 | 0.0495398896280709 | -2.957698737 | Up |
| CEBPA-AS1 | -0.814551795 | 4.67882 | -3.775661712 | 0.00144059443996689 | 0.0152965533541268 | -1.268581023 | Down |
| RN7SL464P | -0.814474872 | 5.0909325 | -3.764857057 | 0.00147527502980845 | 0.0155655206517635 | -1.291676859 | Down |
| LDB1 | 0.814397435897437 | 9.95837125 | 3.9200161004284 | 0.00104840952519836 | 0.0124289322501516 | -0.959603309 | Up |
| ATE1 | -0.814322051 | 8.23574 | -5.124502179 | 7.69723782321999e-05 | 0.00235723107019211 | 1.59990837413356 | Down |
| OTUD7A | -0.813873077 | 5.380458125 | -4.142238561 | 0.000643287572158543 | 0.00909223980855013 | -0.483257691 | Down |
| GAA | 0.813823333333336 | 7.049888125 | 3.45547332579526 | 0.00291302084273229 | 0.0246259618358946 | -1.949885726 | Up |
| ABCB6 | -0.813016923 | 5.97467375 | -4.297186599 | 0.000458112401233502 | 0.00736360395555119 | -0.151330552 | Down |
| PHF23 | -0.812578974 | 6.64515625 | -3.896174462 | 0.00110489015914702 | 0.0128758374696198 | -1.010676542 | Down |
| MED14 | 0.812245128205126 | 9.1067125 | 5.9711402409323 | 1.33622331783513e-05 | 0.00078888047801904 | 3.32302356657235 | Up |
| HS3ST6 | -0.81208641 | 6.023003125 | -4.771733983 | 0.000163499735109174 | 0.00378362586071704 | 0.85915808804925 | Down |
| AMER1 | -0.811991795 | 5.39949 | -4.966408048 | 0.000107721036341507 | 0.00284654670522847 | 1.26931052103151 | Down |
| TMEM39B | 0.811465128205129 | 6.56232875 | 3.84502622340979 | 0.00123656601332508 | 0.0138817430901631 | -1.120196094 | Up |
| MSX1 | -0.811264872 | 6.080820625 | -5.761214929 | 2.04581384760958e-05 | 0.00102182520865907 | 2.90398383323188 | Down |
| NDUFV2 | 0.810975256410257 | 8.636144063 | 3.42315255202463 | 0.00312701976345208 | 0.0259364589419137 | -2.018178811 | Up |
| RN7SL310P | -0.810687949 | 3.848909375 | -3.369215219 | 0.00351928398524412 | 0.028061564093084 | -2.131889117 | Down |
| PERM1 | -0.810431026 | 5.456688125 | -4.274491413 | 0.000481431584886473 | 0.00755744723235686 | -0.199914119 | Down |
| TANK | 0.81011794871795 | 7.1944675 | 3.42196892342622 | 0.00313514513300422 | 0.0259550707842258 | -2.020677665 | Up |
| ADRA2B | -0.810008462 | 5.678048125 | -5.075798852 | 8.5345673516348e-05 | 0.0025011072105583 | 1.49831814340127 | Down |
| RYBP | 0.809315128205126 | 7.924171875 | 3.29033425503425 | 0.004181870770754 | 0.0312995703448823 | -2.297543212 | Up |
| SCAF4 | 0.80930153846154 | 8.5089875 | 4.46236418997061 | 0.000319471398801424 | 0.00576755994722292 | 0.201723866147773 | Up |
| DIS3L | -0.809298718 | 7.381588125 | -4.753295223 | 0.000170121858837874 | 0.00385577466504896 | 0.820152396782538 | Down |
| FIP1L1 | 0.809222564102562 | 8.82175 | 6.14344980385881 | 9.46019778733863e-06 | 0.000615890586115926 | 3.66257384721584 | Up |
| PCYOX1L | 0.808866153846155 | 6.69408375 | 3.33734818405912 | 0.00377347575657417 | 0.0292284478093965 | -2.198907979 | Up |
| TPP1 | 0.808677179487185 | 8.781146875 | 3.0257703475374 | 0.00742932880015515 | 0.0456905538474341 | -2.846219131 | Up |
| VPS8 | -0.808537949 | 7.33990625 | -4.386889753 | 0.000376590264173888 | 0.00645241101441408 | 0.0405352122737179 | Down |
| RN7SL509P | -0.807791282 | 5.18179625 | -3.776540666 | 0.00143780929243259 | 0.015273938550012 | -1.266701959 | Down |
| KCNG2 | -0.807781538 | 6.0796675 | -6.308677725 | 6.81852929173968e-06 | 0.000498180132296479 | 3.98432725372709 | Down |
| RNU6-1161P | -0.807031795 | 6.55555 | -4.499495185 | 0.000294678273095963 | 0.00549040756306294 | 0.280926846987573 | Down |
| KIAA0586 | 0.806992564102563 | 7.165378125 | 4.63523454763355 | 0.000219515869964108 | 0.00449966798477154 | 0.569828807668412 | Up |
| VANGL1 | 0.806968974358976 | 6.152725625 | 3.23072754218854 | 0.0047626632856936 | 0.0343427127050548 | -2.422156571 | Up |
| KIF27 | -0.806660427 | 7.43088395833333 | -3.385198908 | 0.00339822946726033 | 0.027339500929733 | -2.098227553 | Down |
| SLC35F6 | 0.806388461538463 | 8.209650625 | 3.0108534485897 | 0.007672278369621 | 0.0467253179934039 | -2.876778383 | Up |
| SNX4 | -0.806238205 | 7.433428125 | -3.927482042 | 0.00103132534560933 | 0.0123077828111197 | -0.943607347 | Down |
| CCDC6 | 0.806210256410255 | 9.7456025 | 3.52738611255741 | 0.00248753776608326 | 0.0220576362669122 | -1.797560169 | Up |
| EVI5 | -0.80614641 | 6.984559375 | -3.995769587 | 0.000887471014790888 | 0.0111988559511268 | -0.797256672 | Down |
| TTC4 | -0.805777692 | 6.655885625 | -4.052322378 | 0.000783719947882609 | 0.0103432394254247 | -0.676019501 | Down |
| ATP5B | -0.805771795 | 11.04594375 | -4.090066862 | 0.000721353027293464 | 0.00977475291112138 | -0.595098948 | Down |
| ATXN2 | 0.805747948717952 | 8.814216875 | 3.5550646202393 | 0.00234074030675071 | 0.0212361363680182 | -1.738805595 | Up |
| NKX6-2 | -0.805696154 | 5.431411875 | -5.188405306 | 6.72449700247254e-05 | 0.00216774345278876 | 1.73284248502197 | Down |
| MRPS10 | -0.80542359 | 8.25859 | -3.026586676 | 0.00741625172586406 | 0.0456431420582819 | -2.844545472 | Down |
| TTC33 | -0.805277949 | 6.126945 | -4.496190956 | 0.00029680313122455 | 0.00551202436609608 | 0.273881490131445 | Down |
| TIMM44 | -0.805073077 | 7.268918125 | -3.791986787 | 0.00138973433651738 | 0.0149609876125684 | -1.233675223 | Down |
| VPS37D | -0.804383077 | 6.77626875 | -4.946640968 | 0.000112364469749042 | 0.00293596266417142 | 1.22781093427966 | Down |
| TCN2 | 0.804325128205129 | 7.4987075 | 3.24851906297782 | 0.00458146969624128 | 0.0333792792154722 | -2.385015909 | Up |
| DENND2C | -0.803825256 | 4.855390313 | -3.362602549 | 0.00357060212794464 | 0.0283330047137929 | -2.145806392 | Down |
| ATP1B4 | -0.803622051 | 4.36001375 | -4.052806887 | 0.000782885937936527 | 0.0103432394254247 | -0.67498076 | Down |
| CASP2 | 0.803255897435897 | 7.63978875 | 3.49565308333727 | 0.00266710954237453 | 0.0231172637055125 | -1.86483779 | Up |
| RN7SL735P | -0.802792308 | 4.73469125 | -4.270785898 | 0.000485351399894941 | 0.00760732015961762 | -0.207847862 | Down |
| XPNPEP2 | -0.802766923 | 4.751651875 | -4.412716499 | 0.000355963809990143 | 0.00619600337523545 | 0.0957203805449529 | Down |
| NFYC-AS1 | -0.802660513 | 6.280985 | -4.435845208 | 0.000338465148069956 | 0.00601393280189171 | 0.145116595252813 | Down |
| PSME1 | 0.802647692307691 | 9.26190125 | 4.73672945931689 | 0.00017630423383035 | 0.003932174907066 | 0.785087336747726 | Up |
| ARHGEF3 | 0.80260205128205 | 7.2463975 | 3.01123847158598 | 0.00766591144920031 | 0.0466987449415869 | -2.875990182 | Up |
| MED23 | 0.80223923076923 | 8.519299375 | 5.46840768704228 | 3.74037563288758e-05 | 0.00146025016542229 | 2.31013661793301 | Up |
| RNA5SP188 | -0.802097436 | 4.1667425 | -4.86667315 | 0.000133335654440527 | 0.00327135074160516 | 1.05957580639153 | Down |
| MIR219A1 | -0.802020769 | 4.475568125 | -4.181073306 | 0.000590756814620353 | 0.00860325723891061 | -0.400024531 | Down |
| INTS8 | -0.801889487 | 6.650518125 | -3.763233383 | 0.0014805582999464 | 0.0155781923983237 | -1.29514714 | Down |
| PSMD13 | 0.80183692307692 | 7.2644325 | 3.01613720347814 | 0.00758535115099105 | 0.0463865040809943 | -2.865959085 | Up |
| VPS4A | -0.801041282 | 8.206120625 | -3.88780257 | 0.00112543877690033 | 0.0130370783167078 | -1.028607512 | Down |
| HES2 | -0.800929231 | 4.766405 | -4.451753132 | 0.000326938141871605 | 0.00586149790200115 | 0.179077467605326 | Down |
| PRKAG3 | -0.800499487 | 4.5684975 | -4.251540436 | 0.000506234861017133 | 0.00777447037486489 | -0.249059322 | Down |
| CD300LF | 0.800441538461538 | 5.11822875 | 3.82845812299285 | 0.0012825036551921 | 0.0142339584245535 | -1.155654856 | Up |
| RPL10AP2 | -0.800294615 | 6.245280625 | -3.856425906 | 0.00120591907302836 | 0.0136770588005216 | -1.09579348 | Down |
| EIF3M | -0.800182051 | 9.09055875 | -4.803510332 | 0.000152697626902279 | 0.00360945597384525 | 0.926317662653169 | Down |
| FLVCR1 | 0.799847692307692 | 6.25281625 | 3.97154873574886 | 0.000936029952146311 | 0.0115375974224406 | -0.849173173 | Up |
| GTF2A1 | 0.79971333333333 | 8.60251375 | 3.73547249389186 | 0.0015738708528113 | 0.0162382505385007 | -1.354461276 | Up |
| C11orf54 | -0.799655128 | 8.362686875 | -4.742994515 | 0.000173939625976501 | 0.00390183913631792 | 0.798351068908056 | Down |
| PCBP2 | 0.799492307692306 | 11.1838875 | 5.81925974489174 | 1.8174857926072e-05 | 0.000934487582232039 | 3.02042629812543 | Up |
| TAF13 | -0.799267949 | 6.580768125 | -2.99554865 | 0.00792957375870965 | 0.0478422406404985 | -2.90808484 | Down |
| NDUFS1 | -0.798750513 | 8.626631875 | -3.203908754 | 0.00504916765894431 | 0.0356933426226918 | -2.478051049 | Down |
| NEURL1 | -0.798724103 | 5.2149 | -4.268923302 | 0.000487333882910837 | 0.00761013408148394 | -0.211835935 | Down |
| MED15 | 0.79799128205128 | 8.69957125 | 4.07895223962437 | 0.00073918051070116 | 0.00992972920052562 | -0.618927431 | Up |
| KMT2C | 0.79795846153846 | 9.36931125 | 4.14262138666453 | 0.000642747396575298 | 0.00909223980855013 | -0.482437106 | Up |
| RNASEK | 0.797800000000001 | 11.1430125 | 3.11797762371948 | 0.0060857246138363 | 0.0401017765266279 | -2.65635807 | Up |
| PEX19 | -0.797447949 | 7.858556875 | -4.122466995 | 0.000671817005447724 | 0.00934079702762493 | -0.525639949 | Down |
| KLRAP1 | 0.797411025641027 | 3.902613125 | 3.70567659838342 | 0.00168056698045745 | 0.017015193142277 | -1.418080014 | Up |
| TAGLN2 | 0.797121025641022 | 9.0953375 | 3.06339545769589 | 0.00684933680205651 | 0.0432621931830707 | -2.768941976 | Up |
| WDR34 | 0.796882564102563 | 7.58111375 | 3.46577978900602 | 0.00284787935240147 | 0.0241981494955964 | -1.928085482 | Up |
| CDC42EP5 | -0.796839231 | 6.253358125 | -6.324035454 | 6.6153538670768e-06 | 0.000487107808249859 | 4.01403977841753 | Down |
| LOC494141 | -0.79678 | 4.47299625 | -5.507301779 | 3.45020010776604e-05 | 0.00139511634606871 | 2.38962032461321 | Down |
| MAP7D3 | 0.796655128205127 | 7.193355625 | 3.3844989942905 | 0.00340344319446099 | 0.0273559869517904 | -2.099702201 | Up |
| URB1 | -0.796302051 | 7.03803125 | -3.996418257 | 0.000886205939192789 | 0.0111977378647683 | -0.795866186 | Down |
| ERI2 | 0.796086153846153 | 5.41145 | 3.51249650981038 | 0.00257025055747332 | 0.0225630243853223 | -1.829139296 | Up |
| ATP6V0C | 0.795635384615387 | 10.71873375 | 3.90830731930711 | 0.00107577615527394 | 0.0126440929522322 | -0.984687303 | Up |
| SPRNP1 | -0.794962821 | 6.669159375 | -5.123186889 | 7.71870780672729e-05 | 0.00235779715401564 | 1.59716790043703 | Down |
| KAT6B | 0.794678974358972 | 8.4522 | 4.11711226720739 | 0.0006797608138537 | 0.00939133686335993 | -0.537118896 | Up |
| ZC3H7B | -0.794638205 | 8.603913125 | -3.56872583 | 0.00227149041884255 | 0.0208022110773923 | -1.70978251 | Down |
| ZMYND11 | -0.794372308 | 8.8845725 | -3.072879974 | 0.00671024576762706 | 0.0427310650563071 | -2.749418618 | Down |
| NRROS | 0.794356923076922 | 6.512495 | 4.48910726862652 | 0.00030141101148281 | 0.00555334896808684 | 0.258775611296633 | Up |
| USP12 | -0.794304615 | 7.5708375 | -3.580416314 | 0.00221384947136773 | 0.0204397061221782 | -1.684934254 | Down |
| GALT | 0.793871538461538 | 7.081930625 | 3.09636823806782 | 0.00637754698766512 | 0.0413122533745166 | -2.700996408 | Up |
| GPR137C | -0.793637436 | 4.54541625 | -4.824707826 | 0.000145898962689425 | 0.00351340720256159 | 0.971074969445203 | Down |
| MSH2 | 0.793518974358975 | 6.7189275 | 3.02629878817874 | 0.0074208609500039 | 0.0456594525242188 | -2.845135723 | Up |
| SCCPDH | -0.793461026 | 7.85007625 | -3.189103545 | 0.00521450695307108 | 0.0364093809332617 | -2.508859068 | Down |
| MYOCD | -0.792892821 | 4.28148125 | -3.114875141 | 0.006126805080867 | 0.0403154844776305 | -2.66277202 | Down |
| ASTE1 | 0.792497435897435 | 5.4927175 | 3.4942431343991 | 0.00267537982900704 | 0.0231717122536853 | -1.867824875 | Up |
| KLHDC10 | 0.792491452991454 | 6.95960375 | 3.98636088333532 | 0.000906025858807665 | 0.0113348065975471 | -0.817424661 | Up |
| RN7SL484P | -0.791790513 | 3.695796875 | -4.157555917 | 0.000622027557672734 | 0.00893259167386224 | -0.450426229 | Down |
| LARS | -0.791293333 | 8.4190475 | -4.807047156 | 0.000151541198812263 | 0.00359832645457619 | 0.933787930116282 | Down |
| PIPSL | -0.791238462 | 3.76842875 | -4.636029327 | 0.000219138646021625 | 0.00449966798477154 | 0.571517126175635 | Down |
| OSBP | 0.790949230769231 | 8.66061625 | 5.05071811549529 | 9.00157430259819e-05 | 0.00257107466017961 | 1.44591186409219 | Up |
| RTN2 | -0.790673846 | 5.2308775 | -4.692856764 | 0.000193807073260526 | 0.0041666657912392 | 0.692125565495583 | Down |
| CDC27 | 0.790572051282051 | 8.296603125 | 3.64896551667552 | 0.00190397940220361 | 0.0184078956024112 | -1.539026359 | Up |
| PSMC3 | -0.790460769 | 7.644460625 | -3.544429288 | 0.0023961001422036 | 0.0215454884314581 | -1.761389515 | Down |
| MFSD6 | 0.789967435897436 | 8.956691875 | 3.23309985392232 | 0.00473810228558533 | 0.0342146780809411 | -2.417206998 | Up |
| PGRMC2 | 0.789668974358976 | 8.149599375 | 3.40693577945707 | 0.00324017929144245 | 0.0265071459268688 | -2.05240186 | Up |
| STAT3 | -0.78955359 | 10.52785438 | -5.25059664 | 5.89852266514364e-05 | 0.00200552742490093 | 1.86180875464998 | Down |
| LY75-CD302 | 0.789394358974358 | 9.02311625 | 3.27149543725294 | 0.00435746757000944 | 0.032179815162931 | -2.336982753 | Up |
| TRIM4 | 0.78907846153846 | 7.04184625 | 4.19885011538084 | 0.000568175929374222 | 0.00839193687320975 | -0.36193144 | Up |
| PSMD14 | -0.789032821 | 7.8599675 | -3.152906972 | 0.00564141008954526 | 0.0382428069950306 | -2.584029824 | Down |
| CCDC112 | 0.788885128205127 | 4.3213625 | 3.19414529102722 | 0.00515761489209215 | 0.0362510646230373 | -2.498371675 | Up |
| GABRG3 | 0.788625384615385 | 4.628718125 | 3.11273538118172 | 0.00615529578220752 | 0.040423070948411 | -2.667194671 | Up |
| CCDC64B | -0.788391026 | 5.705385625 | -3.687851323 | 0.00174781712647682 | 0.0174459844825676 | -1.456116346 | Down |
| ACTL9 | -0.788192308 | 5.96234375 | -4.299830379 | 0.000455471277810455 | 0.00732620363832178 | -0.145671978 | Down |
| CD164 | 0.787903333333333 | 10.91946813 | 2.97982596195957 | 0.00820262365953492 | 0.0489448411758271 | -2.940195083 | Up |
| DNAJC8 | -0.787615385 | 7.3515225 | -4.006791592 | 0.000866219733472007 | 0.0110601580626898 | -0.773629429 | Down |
| CHURC1-FNTB | 0.787582820512822 | 7.013494375 | 3.26833599933444 | 0.00438761873617169 | 0.0323307713828497 | -2.343592215 | Up |
| FZD3 | -0.787560769 | 7.060556875 | -3.177446213 | 0.00534841691147808 | 0.0369765582960469 | -2.533091875 | Down |
| RNU6-882P | -0.787451795 | 3.79275875 | -4.433389391 | 0.00034028102043385 | 0.00602654235809403 | 0.139872797916334 | Down |
| MFN2 | -0.787445641 | 8.97528375 | -3.183875969 | 0.00527414565131097 | 0.0366938843865985 | -2.519728681 | Down |
| SERBP1 | -0.786801282 | 7.258450625 | -4.292919627 | 0.000462407800939739 | 0.00739491095100411 | -0.160463736 | Down |
| SRRM2 | 0.786642564102563 | 10.13441375 | 4.69246383924206 | 0.000193971577982964 | 0.0041666657912392 | 0.691292386249051 | Up |
| SFPQ | 0.786447179487176 | 9.274395 | 4.27584880753963 | 0.00048000371023352 | 0.00754689074820152 | -0.197007942 | Up |
| ASCC1 | -0.786340513 | 6.969915 | -4.276101669 | 0.000479738192479148 | 0.00754689074820152 | -0.196466571 | Down |
| MGARP | -0.786159231 | 5.163785625 | -4.61657025 | 0.000228566889475968 | 0.00461637882831125 | 0.530169417327158 | Down |
| TMEM183B | -0.785870128 | 9.005702188 | -3.372696048 | 0.00349256395717228 | 0.0279249359004509 | -2.124561107 | Down |
| TBC1D10B | -0.785380769 | 6.139448125 | -3.923542338 | 0.00104030539865649 | 0.0123584778878412 | -0.9520484 | Down |
| SARNP | -0.785318205 | 7.042705625 | -3.988164413 | 0.00090243917484494 | 0.0113020686986088 | -0.813558784 | Down |
| DENND2A | -0.785268205 | 4.89066625 | -4.114547663 | 0.000683598895990758 | 0.00942759731885006 | -0.542616719 | Down |
| ALS2 | -0.785167179 | 5.856315 | -5.074797995 | 8.55271998461821e-05 | 0.0025011072105583 | 1.49622801238331 | Down |
| PPP1R26 | -0.78505 | 6.337966875 | -4.546747463 | 0.000265927091864035 | 0.00513076384939989 | 0.381616257293984 | Down |
| KANSL2 | -0.785030513 | 6.545429375 | -4.585187344 | 0.000244649966617787 | 0.00483159732526086 | 0.463435758418759 | Down |
| BDH1 | 0.785023589743591 | 6.235105 | 3.34452260250889 | 0.00371471316305833 | 0.0289464459015047 | -2.183830673 | Up |
| PPP1R12C | -0.784558718 | 7.231119375 | -3.474821425 | 0.00279192159135627 | 0.0238782155274073 | -1.908951784 | Down |
| SHKBP1 | 0.784040256410256 | 7.974529375 | 3.52386677667974 | 0.00250684632703496 | 0.022178206633403 | -1.805026069 | Up |
| EHMT1 | 0.783915897435897 | 7.190585 | 3.55282981917445 | 0.0023522666392517 | 0.0212973608977981 | -1.743551939 | Up |
| MPST | -0.783658462 | 6.1531275 | -4.870741895 | 0.00013217782635096 | 0.00325982713612723 | 1.0681487094748 | Down |
| KMT2A | 0.783274358974358 | 8.76445375 | 3.81654757218236 | 0.0013165794129059 | 0.0144948117036362 | -1.181139706 | Up |
| TRIML1 | -0.783270256 | 3.33056625 | -4.815748054 | 0.000148734144980821 | 0.00356640608751851 | 0.952161255541294 | Down |
| TMEM190 | -0.783108718 | 5.7004775 | -4.757640901 | 0.000168536925441321 | 0.0038472968866414 | 0.829347616461806 | Down |
| SNRPD2 | -0.783041026 | 7.7267725 | -3.311428795 | 0.00399350757795989 | 0.030337901277546 | -2.253323211 | Down |
| FASTKD2 | -0.782874615 | 6.852704375 | -4.398309936 | 0.000367324226254746 | 0.00632772556139766 | 0.0649405981909386 | Down |
| RNU6-714P | 0.782346923076922 | 4.222786875 | 3.25280607285427 | 0.00453883264416724 | 0.0331584048253978 | -2.376059543 | Up |
| FABP3P2 | -0.781882821 | 3.075986875 | -3.622001846 | 0.00202034987943038 | 0.0191805680814191 | -1.596458995 | Down |
| HIGD1AP1 | -0.781412308 | 8.4172125 | -3.700785291 | 0.00169875935369714 | 0.01714724307346 | -1.428519097 | Down |
| CNIH1 | 0.78136051282051 | 8.36054875 | 4.20840640284345 | 0.00055639923188332 | 0.00825881168948759 | -0.341455984 | Up |
| RN7SL79P | -0.780360769 | 4.601856875 | -3.976027701 | 0.000926853370065109 | 0.0114930395658559 | -0.839573193 | Down |
| DCUN1D5 | -0.780352821 | 6.38285 | -3.413195208 | 0.00319602946969187 | 0.0263029162606315 | -2.039195748 | Down |
| RAB2A | -0.780304872 | 8.802665625 | -3.144952594 | 0.00573971402559663 | 0.0386345927343262 | -2.600519553 | Down |
| ANKIB1 | 0.780252564102563 | 8.947351875 | 5.11729896487324 | 7.81557277996584e-05 | 0.00237803596322016 | 1.58489799787487 | Up |
| OPN3 | -0.779881282 | 7.499963125 | -3.90055302 | 0.00109429334763604 | 0.0127843082974201 | -1.001297833 | Down |
| SLC39A6 | 0.779821282051283 | 8.164758125 | 3.68260765609007 | 0.00176810627839738 | 0.0175732422305363 | -1.467301996 | Up |
| SERPINB6 | -0.779752821 | 8.0911275 | -3.7297308 | 0.00159389153744358 | 0.0163867799131881 | -1.366724288 | Down |
| RABGEF1 | -0.779654359 | 7.7710275 | -3.535477088 | 0.0024437052274724 | 0.0218052977552447 | -1.780391874 | Down |
| TECRL | -0.779613333 | 2.8585275 | -3.530863583 | 0.00246860388747331 | 0.0219685951910426 | -1.790182005 | Down |
| TRA2B | 0.779265641025642 | 9.24456 | 4.10576340628944 | 0.000696911325191436 | 0.00952663475439108 | -0.561448143 | Up |
| IMPDH2 | -0.779040769 | 8.425989375 | -4.598417146 | 0.000237734175480909 | 0.00473377166174695 | 0.491575372128509 | Down |
| PTF1A | -0.778828205 | 6.09599875 | -5.368494952 | 4.60643152077592e-05 | 0.00168279152750352 | 2.10514680799735 | Down |
| PAX3 | -0.778731538 | 3.720940625 | -5.105254367 | 8.0176197702326e-05 | 0.00241742126759135 | 1.55978738546854 | Down |
| HES7 | -0.778613077 | 5.364586875 | -5.041989253 | 9.17017259438716e-05 | 0.00258912801326509 | 1.42765871344907 | Down |
| SNX29 | 0.778075897435898 | 7.07878 | 3.66348662342551 | 0.00184410019618687 | 0.0180590097783728 | -1.508076374 | Up |
| ITIH3 | -0.777579744 | 4.804133125 | -5.1582213 | 7.1672150347558e-05 | 0.00225539537732155 | 1.6701043096865 | Down |
| CXorf57 | -0.777195641 | 5.449881875 | -3.398134365 | 0.00330328012253973 | 0.0268724432167656 | -2.070963553 | Down |
| RN7SKP75 | 0.776793846153847 | 4.607255 | 3.94103638758911 | 0.00100101996163919 | 0.0120416481134911 | -0.914564081 | Up |
| DPPA5 | -0.776789231 | 3.68069875 | -3.425773304 | 0.00310910287699138 | 0.0258522514284831 | -2.012645385 | Down |
| STXBP5 | -0.776683333 | 7.083038125 | -3.303119682 | 0.00406668468244318 | 0.0306442187273791 | -2.270748609 | Down |
| SUGT1 | -0.776599487 | 7.75301625 | -4.007393023 | 0.000865074957510799 | 0.0110538936593773 | -0.772340146 | Down |
| CYP1A1 | -0.776062051 | 3.87232625 | -3.654399409 | 0.00188134870400938 | 0.0183160376960512 | -1.527446267 | Down |
| MRPL13 | 0.77583435897436 | 4.48193875 | 4.25333733245222 | 0.000504247177906539 | 0.00776625494058868 | -0.245211129 | Up |
| TAF5 | -0.775360769 | 5.882379375 | -3.51514136 | 0.00255536148246267 | 0.0224831295099122 | -1.823531336 | Down |
| ALG13 | 0.775298846153846 | 6.620470313 | 4.93102735683157 | 0.000116176465888616 | 0.00300191229541681 | 1.19500671672217 | Up |
| CDC42P6 | -0.774458974 | 9.10501875 | -4.748149119 | 0.000172018376156044 | 0.00387619559855965 | 0.809261706416318 | Down |
| FAM65A | 0.774275384615384 | 7.55253875 | 3.62301531568272 | 0.00201585047624561 | 0.0191534557887715 | -1.59430121 | Up |
| NCOA6 | 0.773986410256411 | 7.569260625 | 3.38449265533181 | 0.00340349045010938 | 0.0273559869517904 | -2.099715556 | Up |
| BCAS3 | 0.773489487179488 | 7.972926875 | 4.28740557445772 | 0.000468018976627352 | 0.00744073553086882 | -0.172266998 | Up |
| CYB5R3 | 0.773475641025643 | 9.309895625 | 3.3406147884314 | 0.00374660758157345 | 0.0290976950695543 | -2.192043899 | Up |
| GALNT10 | 0.773464871794872 | 8.040066875 | 3.19777750358575 | 0.00511700597069733 | 0.0360715889443644 | -2.490813747 | Up |
| CLK4 | -0.773097949 | 7.26283125 | -3.387043695 | 0.00338452522675305 | 0.0273293401294747 | -2.094340494 | Down |
| RN7SL681P | -0.773037436 | 4.75487375 | -5.400984482 | 4.30423898937652e-05 | 0.00161284402130866 | 2.17193124750959 | Down |
| ZBTB47 | -0.773012308 | 6.5087375 | -3.016545842 | 0.00757866839156568 | 0.046385510557306 | -2.865122099 | Down |
| GPCPD1 | 0.772878205128202 | 8.176336875 | 3.02166200498349 | 0.00749548339965064 | 0.0459850570138609 | -2.854640123 | Up |
| HAPLN4 | -0.772198974 | 6.34399 | -4.645841896 | 0.000214535296626898 | 0.00444065200575764 | 0.592358225773213 | Down |
| ZRANB1 | -0.772172821 | 8.61832625 | -3.695370947 | 0.00171912624797791 | 0.0172705497679402 | -1.440072871 | Down |
| SIAH1P1 | -0.771904103 | 3.53653125 | -5.126584336 | 7.66337493376219e-05 | 0.00235323161503551 | 1.60424629710833 | Down |
| SLC35G3 | -0.771157179 | 4.656728125 | -3.259306056 | 0.00447492916827282 | 0.0327879044458281 | -2.362474732 | Down |
| B3GALT5 | 0.770849743589744 | 4.62957875 | 2.99581170880916 | 0.00792508131342917 | 0.0478399042144765 | -2.907547156 | Up |
| ASCL5 | -0.770010769 | 4.39535625 | -3.265293572 | 0.00441684715546413 | 0.0324742765464992 | -2.349955547 | Down |
| NENF | -0.769984359 | 8.094624375 | -3.199859924 | 0.00509386567135445 | 0.035943907720938 | -2.486479687 | Down |
| RBM42 | -0.769974359 | 6.5006425 | -4.339560253 | 0.000417586130020487 | 0.00691119709767475 | -0.060663051 | Down |
| OTUB1 | 0.769766666666669 | 9.49193875 | 4.24422591589974 | 0.000514408053121655 | 0.00785668970780236 | -0.264724733 | Up |
| CTDNEP1 | -0.769132564 | 8.160863125 | -3.503606931 | 0.0026209275896268 | 0.0228414598266281 | -1.847983444 | Down |
| HTR1B | -0.768804872 | 5.401209375 | -4.154470282 | 0.000626252564685602 | 0.00898443955077844 | -0.457039807 | Down |
| CDKN2AIPNL | -0.768537949 | 4.48619625 | -3.926203509 | 0.00103423104190481 | 0.0123172319334059 | -0.946346716 | Down |
| RN7SL430P | -0.768536667 | 5.575030625 | -4.381169558 | 0.000381320138427735 | 0.00651451888733437 | 0.0283089774311183 | Down |
| ZNF275 | 0.76838205128205 | 7.11978375 | 3.09613315497494 | 0.00638079563199177 | 0.0413156560271955 | -2.701481551 | Up |
| GFM2 | -0.767862564 | 6.705115 | -4.624954195 | 0.000224455156609157 | 0.00456092095474247 | 0.54798701991886 | Down |
| GART | -0.767737949 | 7.34967625 | -4.068725562 | 0.000755975464460459 | 0.0101087321573035 | -0.640852491 | Down |
| CENPC | 0.767641538461538 | 6.97253875 | 4.28500683174234 | 0.000470481414483963 | 0.00745445977388016 | -0.177401966 | Up |
| ZBTB44 | -0.767578974 | 8.75202875 | -3.149641103 | 0.00568157018845197 | 0.0383715897949145 | -2.590801403 | Down |
| ASPG | -0.76752641 | 5.716148125 | -4.341289307 | 0.000416011743122464 | 0.00690472112542769 | -0.056964624 | Down |
| INTS4 | 0.767503504273502 | 7.60480770833333 | 3.82537293202084 | 0.00129124465449125 | 0.0143105274190336 | -1.162256687 | Up |
| C1QTNF4 | -0.767318718 | 6.098506875 | -4.676118193 | 0.000200942436988317 | 0.00424987783928014 | 0.656622751010192 | Down |
| SF3B6 | 0.767191794871797 | 9.05219 | 4.14911726302995 | 0.000633650966753812 | 0.00901618014782118 | -0.468513441 | Up |
| WBP4 | -0.766849231 | 6.184385 | -3.931002935 | 0.00102336576059845 | 0.0122441405453122 | -0.936063365 | Down |
| TRMT61B | 0.76655230769231 | 6.46936375 | 3.9259104057495 | 0.00103489832713837 | 0.0123188842240112 | -0.94697471 | Up |
| ANKRD60 | -0.766186154 | 5.36743375 | -4.914996473 | 0.000120227919526949 | 0.00307020215523927 | 1.16130357258589 | Down |
| GPR62 | -0.766148462 | 5.764264375 | -4.96697904 | 0.000107589858568963 | 0.00284630741619389 | 1.27050875867918 | Down |
| SMIM3 | -0.765898462 | 6.2945575 | -6.631721097 | 3.63294441114985e-06 | 0.000336004108693134 | 4.60224667648328 | Down |
| VPS72 | -0.765737179 | 8.277741875 | -3.846690668 | 0.00123204314888501 | 0.0138716607594106 | -1.116633375 | Down |
| LOC100288910 | -0.765476154 | 5.873170625 | -4.492652091 | 0.000299096128113324 | 0.00554257590948195 | 0.266335220857474 | Down |
| SETMAR | 0.765275128205127 | 6.810289375 | 3.52838204646261 | 0.00248210049768607 | 0.0220467068493494 | -1.795447201 | Up |
| PHF20 | -0.765248205 | 6.8993425 | -3.269410224 | 0.00437734423667522 | 0.0322959044394395 | -2.341345125 | Down |
| CD59 | -0.76507 | 10.14118063 | -3.144639626 | 0.00574361591359838 | 0.0386345927343262 | -2.601168126 | Down |
| VPS53 | 0.765016666666666 | 8.154044375 | 4.18668626962751 | 0.000583530803604922 | 0.00853813897360648 | -0.387996214 | Up |
| LIMS1 | -0.764561026 | 8.2565775 | -3.742192996 | 0.00155075592649678 | 0.0161067149638416 | -1.340105629 | Down |
| C10orf120 | -0.764347179 | 3.22015125 | -4.463737134 | 0.000318518012038833 | 0.00576755994722292 | 0.204653651588186 | Down |
| NFATC3 | 0.764074871794868 | 8.8464775 | 3.82578486789547 | 0.00129007411223331 | 0.0143043564861188 | -1.161375228 | Up |
| NAALADL2 | 0.763647435897435 | 5.335836875 | 3.14363894235554 | 0.00575610925324238 | 0.0386866304510199 | -2.60324176 | Up |
| PITX1 | -0.763573077 | 5.110566875 | -5.407184093 | 4.24892809273587e-05 | 0.00159983468590299 | 2.18466127981909 | Down |
| FOXE3 | -0.763264615 | 7.2162775 | -3.88438618 | 0.00113393390668259 | 0.0131159293116879 | -1.035924245 | Down |
| PTBP3 | 0.76298205128205 | 8.35133625 | 3.48239720163544 | 0.00274587570383717 | 0.0235981286981316 | -1.892913873 | Up |
| PPP2R2A | -0.762974872 | 8.06340625 | -4.119293721 | 0.000676513233966446 | 0.00936868327038382 | -0.532442479 | Down |
| CD44 | 0.762945641025642 | 10.37808 | 3.158520904 | 0.00557302461939979 | 0.0379685719977641 | -2.572385457 | Up |
| PRR14 | 0.762901794871797 | 7.609074375 | 3.94140127977403 | 0.00100021659396915 | 0.01204134718783 | -0.91378217 | Up |
| ITGB3BP | 0.762489999999998 | 6.123493125 | 3.43873610104518 | 0.00302196477709144 | 0.0253033303773237 | -1.985264957 | Up |
| TCF4 | 0.762390256410258 | 9.28334875 | 3.28321182011277 | 0.00424742480812337 | 0.0316483809981338 | -2.312460047 | Up |
| TRIM71 | -0.762142051 | 5.97662625 | -4.125066321 | 0.000667994669069199 | 0.00931157401435157 | -0.520067845 | Down |
| ATP6V1C1 | -0.76181 | 8.006449375 | -3.09759659 | 0.00636059847996352 | 0.0412678558700433 | -2.698461285 | Down |
| PPCS | -0.761536923 | 8.13650125 | -4.209135464 | 0.000555510955404248 | 0.00825193998572774 | -0.339893956 | Down |
| ATPAF1 | -0.761152564 | 5.966706875 | -4.573370629 | 0.000250999864745688 | 0.00491188400304596 | 0.438292939557837 | Down |
| POFUT1 | -0.761128205 | 6.66425 | -4.251430894 | 0.000506356289056717 | 0.00777447037486489 | -0.249293917 | Down |
| RB1 | 0.760945641025639 | 8.977295 | 3.72095210521522 | 0.00162499458298736 | 0.0165967347702395 | -1.385470382 | Up |
| ASB16 | -0.760922564 | 5.77496375 | -3.528042669 | 0.00248395198954132 | 0.0220467068493494 | -1.796167232 | Down |
| C1GALT1 | 0.760279230769233 | 7.351986875 | 3.22440039306155 | 0.00482878257164155 | 0.0346824146062402 | -2.435353309 | Up |
| KANK1 | -0.760050769 | 6.77588875 | -3.279744532 | 0.00427970228774706 | 0.0317990219269289 | -2.319719188 | Down |
| AGO1 | 0.759793333333331 | 7.75465875 | 3.24885812449771 | 0.00457808322526104 | 0.0333661884944314 | -2.384307644 | Up |
| NDUFA5P9 | -0.759605385 | 3.027780625 | -4.218174539 | 0.000544616078344242 | 0.00815245146947287 | -0.3205284 | Down |
| GMPPA | 0.759507179487183 | 7.71328625 | 3.8699504216964 | 0.00117054498076699 | 0.0134063350696493 | -1.066837225 | Up |
| TRAPPC10 | 0.759450256410257 | 7.93458 | 4.36293065000891 | 0.00039680704350874 | 0.00665830220522549 | -0.010682937 | Up |
| CD8B | 0.75912858974359 | 4.990345313 | 3.24405606552316 | 0.00462627525499396 | 0.0336216393414855 | -2.394337068 | Up |
| PDZD8 | -0.758978205 | 7.845456875 | -3.335344199 | 0.00379005269705087 | 0.0292790050414864 | -2.203118258 | Down |
| CORO1B | 0.758928974358972 | 7.726023125 | 3.69300526379455 | 0.00172810142387023 | 0.0173308347186504 | -1.445120523 | Up |
| GJC2 | -0.758875641 | 6.727746875 | -4.485146706 | 0.00030401890142532 | 0.00557030264157471 | 0.250328655422357 | Down |
| SLC10A6 | -0.75885 | 5.181004375 | -3.591024953 | 0.00216280227973779 | 0.0200750429047585 | -1.662376193 | Down |
| PRRC1 | 0.758724871794875 | 8.715630625 | 3.80276974071459 | 0.00135712920595394 | 0.0147088762726058 | -1.210613389 | Up |
| TMEM42 | -0.758557949 | 6.539435 | -3.440826585 | 0.00300814029891746 | 0.0252378423134878 | -1.980847688 | Down |
| CLNS1A | 0.75829205128205 | 8.292095625 | 3.34888079221625 | 0.00367945873895765 | 0.0287968921520772 | -2.174668603 | Up |
| SUMO4 | 0.758040769230771 | 5.960028125 | 3.27738790263801 | 0.00430177812971446 | 0.0318999500061263 | -2.324652081 | Up |
| USP3 | 0.757998461538461 | 8.34616375 | 3.3516832318092 | 0.00365696371890342 | 0.0287172686645829 | -2.168775875 | Up |
| IPO7 | -0.757637692 | 9.607979375 | -4.014092981 | 0.000852424516923542 | 0.0109462579702132 | -0.757977314 | Down |
| LRPPRC | -0.757418718 | 8.557960625 | -3.323474914 | 0.00388971748314381 | 0.0298117873658773 | -2.228044465 | Down |
| ST14 | 0.756947948717951 | 8.248486875 | 3.08638354913429 | 0.00651695928616786 | 0.0418766732687985 | -2.721592897 | Up |
| ZP3 | 0.75668923076923 | 4.62064 | 3.60010468716541 | 0.00212004271121031 | 0.0198441106305938 | -1.643062341 | Up |
| PRSS41 | -0.756675897 | 5.7260375 | -3.135203053 | 0.00586249208129482 | 0.0391286090889858 | -2.62071589 | Down |
| YIPF2 | 0.75667307692308 | 7.884776875 | 3.33630845574237 | 0.00378206743170463 | 0.0292418535297795 | -2.201092464 | Up |
| FSD1L | -0.756307692 | 3.62501 | -4.006636969 | 0.000866514292807808 | 0.0110601580626898 | -0.773960894 | Down |
| CPNE3 | 0.756268205128205 | 9.76622125 | 4.07641903459836 | 0.000743305384737611 | 0.00996217285916015 | -0.624358376 | Up |
| ARIH2 | -0.755943333 | 8.113269375 | -3.565975342 | 0.00228526724877835 | 0.0208791547500106 | -1.715627116 | Down |
| TMEM214 | 0.755860256410259 | 9.253553125 | 3.72873747123292 | 0.0015973808818299 | 0.0163947342861851 | -1.368845651 | Up |
| RNA5SP502 | -0.755612051 | 4.323631875 | -2.979628824 | 0.00820610459921403 | 0.0489530790616538 | -2.940597362 | Down |
| RN7SL566P | -0.755608462 | 5.825828125 | -3.02230345 | 0.00748511687895038 | 0.0459370197028211 | -2.853325558 | Down |
| CTAG2 | -0.755264872 | 6.763720625 | -4.367836474 | 0.000392579862771365 | 0.00661595000839638 | -0.00019382 | Down |
| PI4K2B | -0.755258462 | 7.1523425 | -3.711420975 | 0.00165944981841582 | 0.0168526348225785 | -1.405818605 | Down |
| WDR70 | -0.755061282 | 7.010649375 | -4.009485352 | 0.000861104213713445 | 0.01102128276168 | -0.767854814 | Down |
| RN7SL563P | -0.754772564 | 4.791790625 | -4.9875392 | 0.000102973617989431 | 0.00277638222773064 | 1.31363492792376 | Down |
| PUS7 | -0.753821795 | 5.931563125 | -3.656881473 | 0.00187110093162923 | 0.0182467570767709 | -1.522156136 | Down |
| CLPX | -0.753632564 | 8.047046875 | -4.678882301 | 0.000199745968311757 | 0.00423610489849147 | 0.662486792342551 | Down |
| NR2F2 | -0.753621282 | 7.769639375 | -3.5742609 | 0.00224401568173299 | 0.0206154014561099 | -1.69801901 | Down |
| NUDT11 | -0.753207949 | 3.569811875 | -4.532852401 | 0.000274072916773994 | 0.00524021121513656 | 0.352019916159493 | Down |
| LYRM4 | -0.753187436 | 5.906371875 | -5.160135339 | 7.13827421195145e-05 | 0.00225130929713062 | 1.67408546290383 | Down |
| SHC4 | -0.753159744 | 3.700094375 | -3.97797354 | 0.000922894913167264 | 0.0114780745684042 | -0.835402505 | Down |
| PANK1 | -0.753097949 | 6.77664125 | -4.380410995 | 0.000381951876774132 | 0.00651694904244122 | 0.0266875431408788 | Down |
| NEXN-AS1 | -0.752639744 | 5.329316875 | -3.553404741 | 0.00234929601610164 | 0.0212888966746816 | -1.742330941 | Down |
| RPGRIP1L | 0.752522820512819 | 5.353808125 | 3.73907725337552 | 0.00156142995335884 | 0.0161743324101931 | -1.346761439 | Up |
| MOCS1P1 | -0.752367179 | 4.147225 | -3.845803072 | 0.00123445298308972 | 0.0138816953680802 | -1.118533271 | Down |
| LILRA1 | 0.752302051282052 | 5.38569875 | 3.18984591189272 | 0.00520609146737801 | 0.0363908863531653 | -2.507315119 | Up |
| CHRAC1 | 0.752275128205127 | 7.965876875 | 4.43084888912633 | 0.000342169906036047 | 0.0060462122820183 | 0.134447892788526 | Up |
| LHX5 | -0.752121538 | 5.03477125 | -3.843528992 | 0.0012406487077021 | 0.0139085134345421 | -1.123400819 | Down |
| ZC3H11A | -0.752060256 | 9.033814375 | -4.757071274 | 0.00016874381700481 | 0.00384779541712814 | 0.828142396559689 | Down |
| ART5 | -0.750988205 | 4.64772875 | -4.432316704 | 0.000341077279933299 | 0.0060360578309836 | 0.137582251682359 | Down |
| MIR135A1 | -0.750912051 | 2.898020625 | -5.143754464 | 7.38988152777272e-05 | 0.00229037192510371 | 1.64000156805815 | Down |
| MKLN1 | -0.750366923 | 8.210986875 | -5.009555376 | 9.82544876382567e-05 | 0.00269681509824689 | 1.35977225774718 | Down |
| SLC9A3R1 | 0.750192307692309 | 8.50669125 | 3.88227870127937 | 0.00113920634981939 | 0.0131589691225797 | -1.040437588 | Up |
| MIR124-2 | -0.749978462 | 4.8925425 | -4.878458484 | 0.000130010049380318 | 0.0032309980861779 | 1.08440387854006 | Down |
| RTF1 | 0.749896923076923 | 8.25651125 | 3.61633156126962 | 0.00204570872635806 | 0.019319016728212 | -1.608530291 | Up |
| HIBCH | -0.749880513 | 6.84784875 | -3.196596874 | 0.00513017114211551 | 0.0361344511360792 | -2.493270638 | Down |
| SLC38A2 | -0.749700769 | 10.53086813 | -3.001726392 | 0.00782472280325284 | 0.0474059824214749 | -2.895453914 | Down |
| ENTPD7 | 0.749529999999999 | 6.288783125 | 3.95920019108906 | 0.000961805298065916 | 0.0117181370005344 | -0.875638999 | Up |
| ZNF418 | -0.74926 | 5.60016625 | -5.653713269 | 2.55000100714589e-05 | 0.00117922368003074 | 2.68719031029392 | Down |
| NEUROD2 | -0.749139744 | 5.045610625 | -4.217606322 | 0.00054529455644446 | 0.00815736856678499 | -0.321745718 | Down |
| ZC3H12C | -0.749019231 | 6.936101875 | -3.177706976 | 0.0053453849457738 | 0.0369688091783828 | -2.532550053 | Down |
| PIGT | 0.748679487179487 | 6.32508375 | 4.04726533107272 | 0.000792478451585702 | 0.0104154479452453 | -0.686861315 | Up |
| WFDC1 | -0.748662051 | 5.66962875 | -4.152810559 | 0.00062853710069322 | 0.00898730932874655 | -0.460597213 | Down |
| ISCA2 | -0.7485 | 7.09475375 | -3.392114539 | 0.00334713646982727 | 0.0271062229681251 | -2.083653924 | Down |
| AKIRIN1 | -0.748208718 | 8.66888375 | -3.541376275 | 0.00241223076408798 | 0.0216237932379225 | -1.767870758 | Down |
| IFT57 | 0.748077948717945 | 7.81743 | 4.3329174768883 | 0.000423690998464265 | 0.00695910225595957 | -0.074872834 | Up |
| VRK2 | 0.74783923076923 | 7.663249375 | 4.30885829285324 | 0.000446567967876882 | 0.00724890269171651 | -0.126350804 | Up |
| IRF2BP1 | -0.747556923 | 6.62724 | -4.154104805 | 0.000626754907865768 | 0.00898443955077844 | -0.457823158 | Down |
| CSNK1G1 | 0.74740846153846 | 6.221799375 | 4.86665377084933 | 0.000133341193826958 | 0.00327135074160516 | 1.05953497070804 | Up |
| PLAGL2 | 0.747305384615383 | 6.936585625 | 3.52896286340323 | 0.00247893499396681 | 0.0220437000779795 | -1.794214903 | Up |
| SMG9 | 0.747263589743591 | 6.978005 | 2.9672677129164 | 0.00842725883134186 | 0.0497594014321332 | -2.965804814 | Up |
| SEMA6C | -0.747058462 | 5.661165 | -3.916606374 | 0.00105630611389447 | 0.0124721014796423 | -0.96690835 | Down |
| PARP4 | 0.746349743589745 | 9.0224625 | 3.37480878503551 | 0.00347644365946738 | 0.0278377847534889 | -2.120112561 | Up |
| SAV1 | -0.745884872 | 8.312581875 | -3.120097458 | 0.00605781053081759 | 0.0400232179118639 | -2.651974622 | Down |
| SH3PXD2A | -0.745627692 | 6.1299675 | -3.813594944 | 0.00132516603348856 | 0.0145243859603995 | -1.187456606 | Down |
| GPR25 | -0.745535385 | 6.2271825 | -3.513582551 | 0.00256412634736148 | 0.0225177440760942 | -1.826836606 | Down |
| TUBG1 | 0.745023846153844 | 8.987741875 | 3.28875147284796 | 0.00419635189650645 | 0.0313576061724514 | -2.300858711 | Up |
| RBM39 | -0.744773077 | 9.875971875 | -5.93712703 | 1.43114601246317e-05 | 0.000809604857099006 | 3.25552340423596 | Down |
| RNF183 | -0.74458641 | 4.528456875 | -3.780935012 | 0.00142396542247789 | 0.0151961364934488 | -1.257307045 | Down |
| MEOX1 | -0.744535128 | 5.565651875 | -3.102904484 | 0.00628786585164632 | 0.0409848267731773 | -2.687503466 | Down |
| LRG1 | -0.744525897 | 5.055749375 | -4.215000812 | 0.000548416601668396 | 0.00817209222654618 | -0.327327695 | Down |
| COG2 | -0.744518205 | 6.647905625 | -3.914636888 | 0.00106089440593893 | 0.0125160506910151 | -0.971127689 | Down |
| FLJ45684 | -0.744322051 | 4.852205 | -3.292570435 | 0.00416149541430616 | 0.0312272935032948 | -2.292858431 | Down |
| NTMT1 | -0.744099231 | 6.082659375 | -3.169230586 | 0.00544481008712658 | 0.0373351540749218 | -2.550156839 | Down |
| OLIG1 | -0.744015128 | 5.824334375 | -5.867081706 | 1.64918010337788e-05 | 0.00088742602751956 | 3.11603199301253 | Down |
| ZNF75A | 0.743786923076923 | 6.458686875 | 4.38287134465917 | 0.000379906722771654 | 0.00650109103350876 | 0.0319464772253415 | Up |
| NDUFB7 | -0.743766923 | 7.420229375 | -3.064391551 | 0.00683459788573467 | 0.0432042237382202 | -2.766892379 | Down |
| ACSS1 | -0.743454615 | 7.016873125 | -3.186646017 | 0.00524246080143976 | 0.036549120656994 | -2.513969516 | Down |
| KANK2 | -0.743405897 | 7.417369375 | -3.803916347 | 0.00135370746213204 | 0.0147088762726058 | -1.208160834 | Down |
| AHDC1 | 0.743238974358975 | 6.498055 | 3.58722818735755 | 0.00218093585113873 | 0.0201790678374317 | -1.670450581 | Up |
| SPARC | 0.74318717948718 | 11.07640625 | 3.26301771488213 | 0.00443883628565024 | 0.0326050921240624 | -2.354714703 | Up |
| EIF2B5 | -0.743094615 | 6.365945625 | -4.171296092 | 0.000603560114157975 | 0.008721125592486 | -0.420977794 | Down |
| RBBP7 | 0.74304333333334 | 9.799049375 | 3.48169159198627 | 0.0027501324528146 | 0.0236197919326284 | -1.894407885 | Up |
| IDS | 0.742670641025642 | 9.556926563 | 3.97943880322128 | 0.000919925315396952 | 0.0114636582893626 | -0.832261847 | Up |
| PLA2G2C | -0.742659231 | 5.040859375 | -3.802881387 | 0.00135679564626426 | 0.0147088762726058 | -1.210374583 | Down |
| C1DP2 | -0.742332308 | 7.111055 | -3.280979415 | 0.00426817900742779 | 0.031731562400676 | -2.317134021 | Down |
| EPG5 | -0.742175641 | 7.160225625 | -5.430553555 | 4.04691195663651e-05 | 0.00154381676130923 | 2.23260742268515 | Down |
| HTRA1 | -0.74208359 | 8.13931375 | -3.689481486 | 0.00174155702458901 | 0.0174214780356002 | -1.452638596 | Down |
| RNMTL1 | -0.741992821 | 6.3892375 | -3.403598688 | 0.00326396274597496 | 0.0266455970999785 | -2.059440636 | Down |
| KDELR1 | -0.741711282 | 9.86352625 | -3.095592264 | 0.00638827641209804 | 0.0413243292636051 | -2.702597752 | Down |
| HS3ST2 | -0.741619231 | 5.681594375 | -3.792261681 | 0.00138889347032401 | 0.0149609876125684 | -1.233087359 | Down |
| SIPA1L2 | -0.741317179 | 6.735573125 | -3.239503059 | 0.00467242809589116 | 0.0338967445310088 | -2.403843168 | Down |
| NCOA5 | -0.741079231 | 7.982233125 | -3.63056949 | 0.00198262572866956 | 0.0189614517267548 | -1.578215303 | Down |
| HSF2 | -0.740993846 | 6.6299725 | -3.528033368 | 0.00248400275395338 | 0.0220467068493494 | -1.796186966 | Down |
| LOC100130285 | -0.740950769 | 6.9482675 | -4.506588496 | 0.000290168761110958 | 0.00544083935254473 | 0.29604947929365 | Down |
| ATP5O | -0.740139231 | 8.642436875 | -3.135247926 | 0.00586192114167712 | 0.0391286090889858 | -2.620622972 | Down |
| SLC39A11 | 0.739875641025644 | 8.159325625 | 3.10058077094682 | 0.00631960652911882 | 0.041119784861578 | -2.692301261 | Up |
| OR10G4 | -0.739798205 | 4.442620625 | -4.567553443 | 0.000254187091917189 | 0.00495820200347472 | 0.425912511029162 | Down |
| FAM53B | 0.739718717948718 | 7.445588125 | 3.01066816932716 | 0.0076753440673647 | 0.0467317774759846 | -2.877157667 | Up |
| RBM34 | -0.739712051 | 6.982650625 | -4.819707947 | 0.000147474232075503 | 0.00354714337150025 | 0.960521215169746 | Down |
| HAAO | 0.739617948717949 | 6.89034625 | 3.85402557850249 | 0.00121230824965202 | 0.0137105869952558 | -1.100932055 | Up |
| C1orf115 | -0.739061026 | 7.34709625 | -3.916961153 | 0.00105548170750797 | 0.0124721014796423 | -0.966148278 | Down |
| YES1 | -0.739049487 | 7.662905625 | -3.247712983 | 0.00458953052864432 | 0.0334171159110007 | -2.386699658 | Down |
| TRNP1 | -0.739002308 | 6.543270625 | -5.353208955 | 4.75606303829284e-05 | 0.0017159374803946 | 2.07368402127522 | Down |
| RPRD1B | -0.738745385 | 7.988629375 | -4.293651538 | 0.000461668130686564 | 0.00739491095100411 | -0.15889709 | Down |
| CHD7 | 0.738538461538462 | 7.0746525 | 3.53627737580213 | 0.00243941159576231 | 0.0217945607207414 | -1.778693429 | Up |
| OLIG2 | -0.738444359 | 4.160340625 | -4.484446778 | 0.000304482154089595 | 0.00557030264157471 | 0.248835792169496 | Down |
| TBC1D25 | 0.737998205128205 | 6.644796875 | 4.26164924916171 | 0.000495154859013864 | 0.00767835948039663 | -0.227411546 | Up |
| ZNF518A | 0.737580256410257 | 7.146470625 | 3.57097389816223 | 0.00226029146977786 | 0.0207339928221551 | -1.705005062 | Up |
| SNORD96A | 0.737293333333334 | 5.7810175 | 3.22972387330549 | 0.00477309206607624 | 0.0343883946782191 | -2.424250362 | Up |
| NCDN | 0.736947179487178 | 7.19156625 | 3.02921250223244 | 0.00737433942396911 | 0.0454572147459529 | -2.839161026 | Up |
| PRKCD | 0.736788974358971 | 8.813954375 | 3.32944991564792 | 0.00383922743885233 | 0.0295413911909314 | -2.215498882 | Up |
| PPM1B | -0.73676641 | 7.922890625 | -3.202349816 | 0.0050663321792862 | 0.0357806371630626 | -2.481296669 | Down |
| TNPO2 | 0.736598461538459 | 8.05336625 | 4.41555756525973 | 0.000353765840876274 | 0.00617278375119602 | 0.101789322359535 | Up |
| NUP155 | 0.736546666666668 | 8.1279675 | 3.7773576293265 | 0.00143522540220483 | 0.0152696330505455 | -1.264955392 | Up |
| RNU6-1263P | 0.735864871794871 | 3.717116875 | 3.14795758497341 | 0.00570238143355862 | 0.0384564247893376 | -2.594291363 | Up |
| SUV39H1 | 0.735726923076922 | 5.786618125 | 4.06141812327368 | 0.000768211092951617 | 0.0102147977319476 | -0.656519022 | Up |
| TRIM55 | -0.735613846 | 4.41668375 | -2.98684949 | 0.0080795380057427 | 0.0484500111149638 | -2.925857475 | Down |
| TRIM65 | -0.735591026 | 7.050815625 | -4.483482513 | 0.000305121534542544 | 0.0055776216514377 | 0.246779086564422 | Down |
| UBTD1 | -0.735238205 | 7.028395625 | -3.569309059 | 0.00226857972778084 | 0.0207918945007424 | -1.708543109 | Down |
| FAM212B | -0.734982308 | 4.851826875 | -3.729776523 | 0.00159373110502702 | 0.0163867799131881 | -1.366626639 | Down |
| LOC100134368 | 0.734634102564103 | 9.295596875 | 3.22739451820037 | 0.00479738209805083 | 0.0345176430578274 | -2.429109126 | Up |
| RSC1A1 | -0.734616923 | 7.71741375 | -3.352119274 | 0.00365347585351821 | 0.028699548944371 | -2.167858915 | Down |
| EPC2 | 0.734568974358973 | 8.128960625 | 4.10082686159838 | 0.00070450692392791 | 0.00958352962944284 | -0.572031155 | Up |
| PPP2R1A | 0.734449487179484 | 9.451946875 | 3.30981366813391 | 0.00400762945468115 | 0.0303771972463996 | -2.256711087 | Up |
| LOC100131826 | -0.734418974 | 3.58200125 | -3.812845703 | 0.0013273538209269 | 0.0145243859603995 | -1.189059491 | Down |
| ALDH1A2 | -0.734279744 | 4.755804375 | -3.346568852 | 0.00369811926386815 | 0.0288847405103803 | -2.179529211 | Down |
| LOC220077 | -0.734203333 | 5.937343125 | -3.502832438 | 0.00262538940768689 | 0.0228661998972191 | -1.849624869 | Down |
| POU3F4 | -0.733692564 | 4.476288125 | -2.985111983 | 0.00810981928433831 | 0.0485402049460896 | -2.929405342 | Down |
| RN7SL862P | -0.733114872 | 5.4623375 | -3.480358573 | 0.00275819204719835 | 0.0236690655537746 | -1.897230202 | Down |
| HDGFRP2 | -0.733089231 | 6.667905 | -4.375264779 | 0.000386265778594102 | 0.00657131131510419 | 0.0156868751830181 | Down |
| CARS | -0.732994615 | 6.623891875 | -2.995573162 | 0.00792915504264229 | 0.0478422406404985 | -2.908034739 | Down |
| TMEM8C | -0.732602564 | 4.91096375 | -4.756218481 | 0.000169054039865243 | 0.00384779541712814 | 0.826338007220034 | Down |
| CCDC102B | 0.732195897435896 | 5.5867625 | 3.27870018330257 | 0.00428947148536562 | 0.0318433507129357 | -2.321905313 | Up |
| FEZ1 | -0.731303333 | 4.553009375 | -3.128206296 | 0.00595218359222742 | 0.0395347799897533 | -2.635199602 | Down |
| KLC1 | -0.731298462 | 8.29156 | -3.372494678 | 0.00349410426701001 | 0.0279276708337456 | -2.12498508 | Down |
| CACNG1 | -0.731033077 | 4.269835625 | -3.012400198 | 0.00764673173466648 | 0.0466184610358021 | -2.873611767 | Down |
| SIRT7 | -0.731007436 | 6.160093125 | -3.46644847 | 0.00284370318371002 | 0.0241802955500654 | -1.926670716 | Down |
| USP16 | 0.730771794871794 | 8.44057875 | 3.96737280760134 | 0.000944667864280737 | 0.0116186669724491 | -0.858123403 | Up |
| APRT | 0.730208205128202 | 6.9767075 | 3.06672010852791 | 0.00680026344138492 | 0.0431266706625562 | -2.762100317 | Up |
| PIEZO2 | 0.729634017094016 | 5.42632208333333 | 3.64907370958845 | 0.00190352617261731 | 0.0184078956024112 | -1.53879581 | Up |
| WNT9B | -0.729564103 | 5.5101225 | -4.262949657 | 0.000493747420861119 | 0.00766163191611858 | -0.22462694 | Down |
| PPP2R5D | -0.729371538 | 7.797415625 | -4.266426297 | 0.000490004459392212 | 0.0076151279492287 | -0.21718251 | Down |
| ZNF568 | -0.729369231 | 5.4859475 | -4.338125795 | 0.000418896850129035 | 0.00691119709767475 | -0.063731421 | Down |
| FAM171A1 | 0.728771282051282 | 6.95936 | 4.26980524491384 | 0.000486394155101993 | 0.00760831447849809 | -0.209947563 | Up |
| MRPL19 | -0.728456923 | 6.77267875 | -4.428169117 | 0.000344173862005779 | 0.00605868639848446 | 0.128725285934645 | Down |
| NEK8 | 0.728437435897437 | 6.29364875 | 3.0422372249557 | 0.00716983066663497 | 0.0446333449111274 | -2.812432549 | Up |
| RBMS1 | 0.728314871794872 | 7.8810525 | 3.25312746246055 | 0.00453565198122968 | 0.0331490877160615 | -2.375387991 | Up |
| DDX51 | -0.727771026 | 6.013249375 | -4.226569794 | 0.000534690528089726 | 0.00804521119314864 | -0.302543651 | Down |
| TCF21 | -0.727755641 | 4.358701875 | -5.168792478 | 7.00886327129963e-05 | 0.00223163355552159 | 1.69208742037606 | Down |
| COL18A1 | -0.727374615 | 7.192468125 | -3.772454478 | 0.00145080304316013 | 0.0153769288435348 | -1.275437291 | Down |
| ZNF180 | -0.727266923 | 6.345995625 | -3.985587898 | 0.000907567479439674 | 0.0113480017399681 | -0.819081549 | Down |
| BCL9 | 0.726924358974361 | 7.473669375 | 3.96446501895379 | 0.000950729872097271 | 0.0116563183213946 | -0.8643555 | Up |
| FAM117A | 0.726591025641023 | 7.294111875 | 4.42273411884869 | 0.000348274813557694 | 0.00611698649554573 | 0.117117971550554 | Up |
| AGPAT6 | -0.726402051 | 7.493595 | -3.152077527 | 0.0056515832990365 | 0.0382608302286393 | -2.5857498 | Down |
| CBLN1 | -0.726397179 | 5.253615625 | -4.615949299 | 0.000228874451815179 | 0.00461637882831125 | 0.528849594816343 | Down |
| RBMX2 | -0.726007949 | 7.277041875 | -3.356590753 | 0.00361789773078804 | 0.0285354796654744 | -2.15845441 | Down |
| SLC25A17 | 0.725779743589742 | 7.037539375 | 3.37007758335694 | 0.00351264543576398 | 0.0280305609478535 | -2.130073762 | Up |
| ACADVL | -0.72560641 | 9.315408125 | -3.450086222 | 0.0029476547212756 | 0.0248409684627726 | -1.961276203 | Down |
| NRP2 | 0.725266794871796 | 6.687185938 | 3.59043117884803 | 0.00216562825807334 | 0.0200849067853635 | -1.663639015 | Up |
| RALY | -0.725081538 | 9.34486125 | -4.447230914 | 0.000330173878210031 | 0.00590588072098327 | 0.169424435402727 | Down |
| RN7SL521P | -0.724597692 | 6.266034375 | -4.390591015 | 0.000373561502752975 | 0.00640662100416746 | 0.0484455303774647 | Down |
| C15orf52 | -0.724516923 | 6.27809 | -4.175519159 | 0.000597995993328137 | 0.00867298856036024 | -0.411927287 | Down |
| SUMF1 | -0.724477179 | 6.276495625 | -3.570935371 | 0.00226048293478766 | 0.0207339928221551 | -1.705086941 | Down |
| YWHAZP3 | 0.72391871794872 | 9.498240625 | 3.83720232917017 | 0.00125804999217147 | 0.0140451728365846 | -1.13694181 | Up |
| RHOBTB2 | 0.723830769230772 | 7.6200425 | 3.39752665465645 | 0.00330768159046161 | 0.0268825788983313 | -2.072244854 | Up |
| CCDC102A | -0.723644872 | 6.166261875 | -3.783053569 | 0.00141733884870539 | 0.0151462249182836 | -1.252777369 | Down |
| SHQ1 | -0.723325897 | 7.182654375 | -5.424833663 | 4.09542715470992e-05 | 0.00155713084330871 | 2.22087798719321 | Down |
| TBC1D15 | -0.723125641 | 8.84690375 | -4.598219287 | 0.000237836127168047 | 0.00473377166174695 | 0.491154606398244 | Down |
| RASSF8 | -0.722889231 | 6.8765825 | -3.978821893 | 0.000921174413029423 | 0.0114689166904256 | -0.83358414 | Down |
| ASB14 | -0.722715897 | 3.02667 | -3.935720535 | 0.00101279736673963 | 0.0121488771109627 | -0.925954909 | Down |
| MIF4GD | 0.721443076923078 | 6.6968125 | 3.18141463753449 | 0.00530245673503577 | 0.0368243408162878 | -2.524844951 | Up |
| HADH | -0.721225897 | 8.067870625 | -5.216099498 | 6.34295305681196e-05 | 0.00210891878595031 | 1.79032235391469 | Down |
| TOMM40 | -0.721155641 | 6.827284375 | -3.042825998 | 0.00716071770939599 | 0.0445885246200621 | -2.811223513 | Down |
| APPL1 | -0.720672308 | 8.90298375 | -4.655130303 | 0.000210268485393266 | 0.00439133296510828 | 0.612080274426464 | Down |
| GLRX2 | -0.720504615 | 5.99385 | -4.306965413 | 0.000448420020508858 | 0.00726199500617577 | -0.130401662 | Down |
| C1QL4 | -0.720451795 | 5.89916625 | -4.382411361 | 0.000380288237010523 | 0.00650284515040664 | 0.030963292379738 | Down |
| RN7SL864P | -0.720072051 | 3.237998125 | -4.056889664 | 0.000775893422752891 | 0.0102826707709049 | -0.66622765 | Down |
| ZNF787 | -0.719875128 | 6.444108125 | -5.958690531 | 1.37019007710672e-05 | 0.000801926010263813 | 3.29833472185253 | Down |
| RN7SL606P | -0.719552308 | 2.91192375 | -4.450434361 | 0.00032787841307013 | 0.00587240679295382 | 0.17626254367128 | Down |
| RUNDC1 | -0.719512308 | 7.04080625 | -3.820390371 | 0.00130548739770234 | 0.0144147827565748 | -1.172917881 | Down |
| NTN1 | -0.71944 | 6.651605 | -3.770990864 | 0.00145548571418056 | 0.0154195479729119 | -1.278565982 | Down |
| F8A2 | 0.719315555555557 | 9.281445 | 3.31671882768967 | 0.00394759650065037 | 0.0300577039009011 | -2.242224451 | Up |
| DGAT1 | 0.71870512820513 | 7.62415125 | 3.3398052269115 | 0.00375324867571092 | 0.0291201620788263 | -2.193745148 | Up |
| ACADS | -0.71830641 | 6.729139375 | -3.146095884 | 0.00572548221623163 | 0.038589882595058 | -2.598150134 | Down |
| VEGFB | -0.718217692 | 7.989248125 | -3.028878656 | 0.00737965531245722 | 0.045477955147393 | -2.839845679 | Down |
| PCNXL2 | 0.718113076923077 | 6.643076875 | 3.34992343464486 | 0.00367107360660572 | 0.0287661405903654 | -2.172476339 | Up |
| GLTSCR1L | 0.717933846153845 | 7.21430125 | 4.91483926989216 | 0.000120268355761507 | 0.00307020215523927 | 1.16097295949553 | Up |
| CCDC149 | -0.717613846 | 6.05310875 | -3.52099927 | 0.00252268858392794 | 0.0222628939135208 | -1.811108366 | Down |
| APOB | -0.717396667 | 3.736531875 | -3.219497906 | 0.00488063297881784 | 0.0348614504558098 | -2.445574377 | Down |
| ZNF547 | 0.71733205128205 | 5.238245625 | 3.16928602406068 | 0.00544415396260086 | 0.0373351540749218 | -2.550041723 | Up |
| RN7SL333P | -0.717035641 | 5.924711875 | -3.342396938 | 0.00373202884120959 | 0.0290328425240561 | -2.188298515 | Down |
| PELI3 | -0.716773846 | 5.32900125 | -4.084318551 | 0.000730518396513072 | 0.00987025638697402 | -0.607422628 | Down |
| DERL1 | 0.716660256410256 | 9.065113125 | 3.55744787672303 | 0.00232851010671553 | 0.0211411587888687 | -1.733743497 | Up |
| PRKRIP1 | 0.716203846153846 | 7.199915625 | 3.14101966839538 | 0.00578893641419502 | 0.038857937303903 | -2.60866865 | Up |
| ACTR1B | -0.716113846 | 7.9614275 | -4.551275482 | 0.000263326062139124 | 0.00510957905556466 | 0.391258571137241 | Down |
| STT3A | 0.715942051282052 | 10.34729625 | 3.14915951809134 | 0.00568751582010535 | 0.038378381939547 | -2.591799785 | Up |
| UTP3 | -0.715889487 | 6.722003125 | -3.309983169 | 0.00400614511871483 | 0.0303771972463996 | -2.256355561 | Down |
| DMRTA1 | -0.71528 | 5.653515 | -3.646908032 | 0.00191261887335974 | 0.0184585615822154 | -1.543410531 | Down |
| SMARCB1 | 0.715270512820514 | 8.047870625 | 3.67710924846032 | 0.0017896333599647 | 0.017735661963854 | -1.479029288 | Up |
| TNFAIP8L2 | 0.715010512820512 | 5.209359375 | 3.31824102843474 | 0.0039344822699138 | 0.0300162334714347 | -2.23903011 | Up |
| OR7E5P | 0.714607692307693 | 7.52484875 | 3.22304450371224 | 0.00484306857678512 | 0.0347208241523011 | -2.438180537 | Up |
| FAM195A | -0.714435641 | 6.139084375 | -3.109735491 | 0.00619545716394921 | 0.0406082370562094 | -2.673393732 | Down |
| RN7SL395P | -0.714332051 | 6.263591875 | -3.303658449 | 0.00406190006758355 | 0.0306278566403008 | -2.269619021 | Down |
| KRTAP23-1 | -0.7142 | 4.6961425 | -4.626240813 | 0.000223830851925797 | 0.00456000516557857 | 0.550720956944185 | Down |
| ZNF92 | 0.714012307692309 | 6.667725 | 3.40871461785633 | 0.00322757158934595 | 0.0264318380298265 | -2.048649323 | Up |
| SNX7 | -0.714006923 | 4.978739375 | -3.358777738 | 0.00360062131178168 | 0.0284763084199849 | -2.153853799 | Down |
| ZNF567 | 0.713899487179487 | 4.84751 | 3.99239981910634 | 0.000894072207295424 | 0.01124554420982 | -0.804480028 | Up |
| VAX2 | -0.713580513 | 6.0789625 | -4.269359334 | 0.00048686905349362 | 0.00761013408148394 | -0.210902323 | Down |
| DUSP9 | -0.713458205 | 6.174161875 | -4.136947045 | 0.000650801088541087 | 0.00914850480737462 | -0.494600206 | Down |
| PEX6 | -0.713328718 | 6.61626375 | -3.786691924 | 0.001406030409203 | 0.0150668279297904 | -1.244997778 | Down |
| SCFD2 | 0.71318205128205 | 7.16617375 | 3.52849005188196 | 0.00248151155508687 | 0.0220467068493494 | -1.795218052 | Up |
| GPR75 | 0.712376410256407 | 7.0116525 | 3.03816693738267 | 0.00723313982910048 | 0.0449171072893926 | -2.820788944 | Up |
| CASP6 | -0.712307949 | 5.993223125 | -2.979038725 | 0.00821653281475444 | 0.0489776803870797 | -2.94180147 | Down |
| RPL36AP39 | -0.712200769 | 4.153776875 | -3.017192004 | 0.00756811291540272 | 0.0463330726869691 | -2.863798538 | Down |
| CHRD | -0.712051538 | 5.414468125 | -3.663100123 | 0.00184566939314649 | 0.0180667856136351 | -1.508900327 | Down |
| GTF2H1 | 0.711974358974358 | 7.9883125 | 3.88225176735148 | 0.00113927389129896 | 0.0131589691225797 | -1.040495269 | Up |
| RASL12 | -0.711927179 | 5.8073225 | -4.153745722 | 0.000627248857959707 | 0.00898536216725108 | -0.458592805 | Down |
| NPIPA3 | 0.711814487179486 | 9.39486260416667 | 3.33280515051344 | 0.00381115882700571 | 0.0293641913325693 | -2.20845194 | Up |
| CHUK | -0.711801538 | 6.81591125 | -3.568404184 | 0.00227309722864798 | 0.0208087498460717 | -1.710466018 | Down |
| HDAC5 | -0.711797436 | 7.13433125 | -3.975332217 | 0.000928272339510443 | 0.0114930395658559 | -0.841063873 | Down |
| CNOT10 | -0.711703077 | 6.79470125 | -4.869759584 | 0.000132456416075754 | 0.00325982713612723 | 1.06607909230891 | Down |
| CYCSP39 | -0.711493846 | 2.75805125 | -4.059592305 | 0.00077129925946968 | 0.0102423357547775 | -0.660433423 | Down |
| HMX1 | -0.71137 | 6.176711875 | -3.267531563 | 0.00439532835815691 | 0.0323466744690758 | -2.345274848 | Down |
| TMEM19 | 0.711193589743588 | 7.851408125 | 3.06537036928004 | 0.00682014471988811 | 0.0431772246790555 | -2.764878143 | Up |
| ING1 | -0.710621026 | 6.01899375 | -5.757575521 | 2.06107966006288e-05 | 0.00102644409480952 | 2.89666843216182 | Down |
| RN7SL668P | -0.710270256 | 5.29104875 | -3.103757795 | 0.00627624921069712 | 0.0409634669150708 | -2.685741377 | Down |
| TRIM39-RPP21 | 0.710193179487177 | 6.884688625 | 3.07998945029926 | 0.00660779561574205 | 0.0422518223363786 | -2.734772963 | Up |
| GET4 | -0.709782564 | 6.846375 | -3.757984582 | 0.00149776706753316 | 0.0156894558438211 | -1.306364586 | Down |
| PLXNA3 | 0.709518717948717 | 6.766260625 | 2.97732065556322 | 0.00824696779566323 | 0.0490837789615738 | -2.945306795 | Up |
| ABCD3 | -0.709162308 | 7.790845625 | -3.578048711 | 0.00222540452139962 | 0.0205009893993126 | -1.689967495 | Down |
| ZFR | -0.709004615 | 9.43745375 | -4.597723137 | 0.000238091976235113 | 0.00473482055470288 | 0.49009948586534 | Down |
| TMEM62 | 0.70847282051282 | 7.7585675 | 3.16988136633694 | 0.00543711286575693 | 0.0373153090583618 | -2.548805486 | Up |
| ATP5G1P5 | 0.708334871794871 | 3.52849875 | 3.4669275337921 | 0.00284071497319689 | 0.0241725242352318 | -1.925657105 | Up |
| EIF4E1B | -0.707628205 | 6.08362875 | -4.283425754 | 0.000472111634091593 | 0.00746187129489195 | -0.180786653 | Down |
| BARHL1 | -0.707305385 | 5.177044375 | -4.624338573 | 0.000224754500195706 | 0.00456302537984436 | 0.546678848034684 | Down |
| CPSF3L | 0.707282307692309 | 7.807336875 | 3.42968939932015 | 0.00308251940165668 | 0.0256678384045774 | -2.004375594 | Up |
| CAB39 | -0.70713 | 9.392626875 | -3.748284239 | 0.00153009837826954 | 0.0159276475669174 | -1.327092216 | Down |
| KLF1 | -0.707121538 | 6.09838375 | -4.054320649 | 0.0007802859701309 | 0.0103261011805802 | -0.67173539 | Down |
| SESN2 | -0.706145128 | 6.02110375 | -4.219254315 | 0.000543329124673921 | 0.00814364752975889 | -0.318215168 | Down |
| IGF2R | -0.706120256 | 8.322440625 | -3.053430657 | 0.00699849947514658 | 0.0438832465071944 | -2.789435385 | Down |
| RN7SL362P | -0.706038462 | 4.48003375 | -3.442632319 | 0.00299624928341719 | 0.0251561894987768 | -1.977031734 | Down |
| ZNF30 | -0.70585 | 4.129566875 | -3.122489981 | 0.00602645601369349 | 0.0398998884629376 | -2.647026341 | Down |
| KLF9 | -0.705694872 | 8.23893625 | -3.123756024 | 0.00600992850664555 | 0.0398162034407015 | -2.644407465 | Down |
| CLIC4 | -0.70561641 | 9.52536 | -3.063527601 | 0.00684737973393828 | 0.0432615558305501 | -2.768670084 | Down |
| MBD1 | -0.705564615 | 7.44168875 | -4.038236946 | 0.000808360692700591 | 0.0105209582213189 | -0.706217133 | Down |
| TRIM28 | -0.705248462 | 8.961505625 | -3.110177947 | 0.00618951767805319 | 0.0406082370562094 | -2.672479531 | Down |
| HSD17B1P1 | -0.70520359 | 6.48188875 | -4.349743013 | 0.000408400299343589 | 0.0068087165785415 | -0.038883728 | Down |
| NOL4L | 0.705143846153848 | 6.361029375 | 4.96922559980981 | 0.000107075324619732 | 0.00283914060399557 | 1.27522291790657 | Up |
| BMX | -0.704947949 | 3.886713125 | -3.683360858 | 0.00176517755594338 | 0.0175516183005002 | -1.465695385 | Down |
| SLC35A1 | -0.704506923 | 6.594058125 | -4.368246662 | 0.000392228490592198 | 0.00661481145458202 | 0.000683159120696608 | Down |
| SMTN | -0.704406923 | 6.274039375 | -3.424559426 | 0.00311738895122721 | 0.0258842124283052 | -2.015208447 | Down |
| VPS13A | -0.703118718 | 7.162929375 | -4.057918219 | 0.000774141766838647 | 0.0102691645758158 | -0.664022519 | Down |
| RTFDC1 | -0.702924615 | 7.10619375 | -4.052631646 | 0.000783187484889141 | 0.0103432394254247 | -0.675356458 | Down |
| RNU6-725P | 0.702878205128204 | 4.299991875 | 3.75136284232544 | 0.00151976255209584 | 0.0158435376439121 | -1.320514361 | Up |
| DYM | 0.702841794871793 | 9.069605625 | 4.00479007069821 | 0.000870040447974437 | 0.0110627565307912 | -0.777920054 | Up |
| ARFGAP1 | 0.702585641025643 | 7.5764875 | 4.32345674265328 | 0.000432541918685434 | 0.00706464926335068 | -0.095113156 | Up |
| RN7SL219P | -0.702477949 | 4.99624 | -3.60640112 | 0.00209088544930732 | 0.0196263661566677 | -1.629665333 | Down |
| LOC100132005 | 0.702254871794872 | 4.81485875 | 3.98124102979865 | 0.000916285967660624 | 0.0114386058105336 | -0.828398903 | Up |
| LMBR1 | 0.70215 | 8.368266875 | 3.56143491139998 | 0.00230819154618636 | 0.0210308914648028 | -1.725273886 | Up |
| CMAHP | 0.701826410256409 | 7.617660625 | 3.59240769299407 | 0.00215623554687441 | 0.0200460238895102 | -1.659435317 | Up |
| VPS26B | 0.701784102564104 | 7.85681625 | 3.29208768617697 | 0.00416588578131736 | 0.0312355447528351 | -2.293869845 | Up |
| C11orf73 | -0.70166359 | 6.893205 | -5.066388275 | 8.70681698198814e-05 | 0.0025150203372353 | 1.47866182773742 | Down |
| PCSK6 | -0.701569487 | 5.332718125 | -3.149292042 | 0.00568587907583822 | 0.038378381939547 | -2.591525051 | Down |
| GPR27 | -0.701444359 | 7.349213125 | -4.511084673 | 0.000287346691875616 | 0.005414057677886 | 0.305633778287378 | Down |
| SLC35E3 | 0.701305384615385 | 6.691000625 | 5.50638124080621 | 3.45679340809516e-05 | 0.00139511634606871 | 2.38774119108004 | Up |
| PDPK1 | 0.701196068376067 | 6.60649625 | 3.01849429942196 | 0.00754688253408095 | 0.0462395350215102 | -2.861130733 | Up |
| SPPL2B | 0.701085641025643 | 7.19542875 | 3.04803911766091 | 0.0070805205201593 | 0.0442428128051884 | -2.800515487 | Up |
| FEV | -0.700872564 | 5.688384375 | -4.711282018 | 0.000186250398920008 | 0.00408366702505045 | 0.731183437190224 | Down |
| EMX2 | -0.700775385 | 4.376 | -3.097855804 | 0.00635702753595675 | 0.0412678558700433 | -2.697926274 | Down |
| PPP1CB | -0.700503333 | 9.557714375 | -4.68719175 | 0.000196192630934507 | 0.00419125724032132 | 0.680112118553692 | Down |
| DAAM1 | 0.70043358974359 | 6.880895625 | 3.07885674357301 | 0.00662401549622673 | 0.0423323085194835 | -2.737106997 | Up |
| TNKS1BP1 | -0.700411282 | 7.1857225 | -3.322084671 | 0.00390155886312285 | 0.0298730724122222 | -2.23096286 | Down |
| NR2C2 | 0.700384871794874 | 8.681059375 | 3.95973114943605 | 0.000960682490478472 | 0.0117105788732122 | -0.874501076 | Up |
| ZNRF2P1 | -0.700274872 | 7.2247 | -3.679250211 | 0.0017812202826089 | 0.0176659153730917 | -1.474463148 | Down |
| GAPVD1 | -0.700265641 | 8.0806675 | -3.649308498 | 0.00190254299416764 | 0.0184078956024112 | -1.538295494 | Down |
| SLC6A19 | -0.699770769 | 4.55657625 | -4.228078166 | 0.000532926664509571 | 0.00802903798947936 | -0.299312493 | Down |
| TNIP2 | -0.699746923 | 6.681395625 | -3.251631349 | 0.00455047707749243 | 0.0332157748966853 | -2.37851403 | Down |
| GUCY2D | -0.699633077 | 5.515338125 | -4.400264728 | 0.000365761468430522 | 0.00631450581972969 | 0.0691175382104099 | Down |
| RETN | -0.699161026 | 5.888395 | -3.998122669 | 0.00088289052186368 | 0.0111834398875417 | -0.792212596 | Down |
| LRRC8D | 0.698951025641023 | 8.399384375 | 3.15877425331116 | 0.005569957686108 | 0.0379587730380465 | -2.571859836 | Up |
| GPR150 | -0.698598462 | 6.66509875 | -5.344287548 | 4.84568967777246e-05 | 0.00173294040307882 | 2.05530916947913 | Down |
| FAM124B | -0.698117436 | 5.31119625 | -3.620703761 | 0.00202612746463503 | 0.0191963222838409 | -1.59922265 | Down |
| CPSF2 | -0.69805359 | 8.884428125 | -3.670341508 | 0.00181648912823756 | 0.0178854250872767 | -1.49346136 | Down |
| BTNL3 | -0.697996154 | 3.017968125 | -3.559752062 | 0.00231674604011282 | 0.0210676550748769 | -1.728848903 | Down |
| KEAP1 | -0.697989744 | 7.71699 | -5.20444545 | 6.50073267348974e-05 | 0.00214149571822662 | 1.76614391543039 | Down |
| CDH19 | -0.697852564 | 3.175618125 | -3.595536387 | 0.00214145024772662 | 0.0199802966067912 | -1.652780526 | Down |
| HERC4 | -0.697626154 | 7.67123875 | -3.265680582 | 0.0044131185633182 | 0.0324571014058875 | -2.349146176 | Down |
| MGST2 | -0.697253333 | 7.516025 | -3.30767542 | 0.00402640095104577 | 0.0304686126513064 | -2.261195723 | Down |
| WDR61 | 0.697103846153847 | 6.937006875 | 3.97580468113703 | 0.000927308151574711 | 0.0114930395658559 | -0.840051208 | Up |
| NET1 | -0.697 | 8.1441475 | -4.083249801 | 0.00073223534612772 | 0.00987274161576672 | -0.609713909 | Down |
| NKD1 | -0.696615641 | 5.543043125 | -4.177799813 | 0.000595012659203017 | 0.00865125392891124 | -0.4070397 | Down |
| DND1 | -0.696453846 | 7.37003125 | -3.32019424 | 0.00391771761786818 | 0.0299181666184973 | -2.234930844 | Down |
| RN7SL317P | -0.696180769 | 4.258933125 | -3.074687227 | 0.0066840566135425 | 0.0426225191496128 | -2.745696545 | Down |
| RNU6-862P | 0.695632820512821 | 3.920955 | 2.97689449359006 | 0.00825453403613853 | 0.0490927583879987 | -2.946176183 | Up |
| FBXO33 | -0.695608462 | 6.484998125 | -3.121047739 | 0.0060453378523394 | 0.0399712593828296 | -2.650009347 | Down |
| NKX1-2 | -0.694907692 | 6.0611475 | -4.275661247 | 0.000480200754261932 | 0.00754689074820152 | -0.197409505 | Down |
| LINS | 0.694305384615383 | 6.625173125 | 4.71596777764967 | 0.000184376954603098 | 0.00407324519519849 | 0.741112503430339 | Up |
| ZNF771 | -0.693896154 | 5.499679375 | -4.677771264 | 0.000200226016523459 | 0.00424242524282933 | 0.660129795366504 | Down |
| HRAS | -0.693695641 | 6.989195625 | -3.759925903 | 0.00149137906670633 | 0.015664520913801 | -1.302215851 | Down |
| MRPL9 | -0.693655385 | 8.472515 | -3.959963861 | 0.000960190795195573 | 0.0117105788732122 | -0.874002339 | Down |
| ECEL1P2 | -0.693367436 | 4.730005625 | -4.62579041 | 0.0002240491994696 | 0.00456000516557857 | 0.549763906703735 | Down |
| YWHAZ | 0.692885897435897 | 10.59915313 | 4.60961989630279 | 0.000232033572342007 | 0.00466207454359927 | 0.5153951584681 | Up |
| FLJ38576 | -0.692251538 | 5.540625625 | -3.622345632 | 0.00201882248650651 | 0.0191738776255124 | -1.595727046 | Down |
| G3BP1 | -0.692151282 | 9.47912375 | -3.035043987 | 0.007282082979263 | 0.0451032442194214 | -2.827198207 | Down |
| PWP2 | -0.691535897 | 6.40548375 | -3.171738825 | 0.00541520204953502 | 0.0372526901323828 | -2.54494807 | Down |
| HERPUD2 | 0.6915217948718 | 8.867878125 | 5.34684487665342 | 4.81982229251365e-05 | 0.00173187634388303 | 2.06057724752378 | Up |
| BAZ2A | 0.691391025641025 | 8.587181875 | 3.81319261011626 | 0.00132634040116841 | 0.0145243859603995 | -1.18831734 | Up |
| RAE1 | -0.691342821 | 6.801150625 | -3.870000199 | 0.00117041672502404 | 0.0134063350696493 | -1.066730641 | Down |
| C1orf186 | 0.691064615384615 | 5.53729 | 2.97809524777004 | 0.00823323263887187 | 0.0490521352541377 | -2.943726496 | Up |
| NEUROG3 | -0.690990513 | 4.801756875 | -3.951340962 | 0.000978580014003945 | 0.0118358922607109 | -0.892482005 | Down |
| GCM2 | -0.690724359 | 4.020663125 | -3.000056157 | 0.00785293694196635 | 0.0475274996900571 | -2.898869637 | Down |
| DNAJC4 | 0.690667179487178 | 7.12781375 | 4.05962759717516 | 0.000771239447736459 | 0.0102423357547775 | -0.660357758 | Up |
| SOX12 | -0.690664615 | 6.268465 | -4.276870304 | 0.000478931998342266 | 0.00754220816578594 | -0.194820954 | Down |
| PARK7 | 0.690314102564102 | 9.435266875 | 3.24662813558453 | 0.0046004010575642 | 0.033476307979537 | -2.38896555 | Up |
| ITM2A | 0.690166153846156 | 8.20913 | 3.06647797703694 | 0.00680382580453165 | 0.0431266706625562 | -2.76259866 | Up |
| FTSJ1 | 0.689990512820514 | 7.377800625 | 3.82948794395853 | 0.00127959915941486 | 0.0142203261329247 | -1.153451124 | Up |
| RPL27A | -0.689941538 | 6.1232475 | -3.56007407 | 0.00231510673239521 | 0.0210609651100449 | -1.728164853 | Down |
| CIRBP | 0.689746666666668 | 10.2754525 | 3.04485187788797 | 0.00712944753889746 | 0.0444665816467578 | -2.807062882 | Up |
| BZW1 | -0.689694872 | 8.89165625 | -3.303117999 | 0.0040666996406137 | 0.0306442187273791 | -2.270752138 | Down |
| PARS2 | -0.689643846 | 6.754574375 | -4.254990318 | 0.000502425650196404 | 0.00775099491369798 | -0.2416712 | Down |
| EFCAB7 | -0.689242821 | 5.624986875 | -4.338955094 | 0.000418138580736232 | 0.00691119709767475 | -0.061957506 | Down |
| RNF185 | -0.689184615 | 7.8188775 | -3.012898055 | 0.00763852658137995 | 0.0466048926619643 | -2.872592415 | Down |
| ZNF548 | 0.689112820512821 | 7.3474775 | 3.97452778934357 | 0.00092991630606531 | 0.0114930395658559 | -0.842788053 | Up |
| MNX1 | -0.688994615 | 6.210651875 | -4.652444515 | 0.000211493304723366 | 0.00440901113880813 | 0.60637813004211 | Down |
| RN7SL43P | -0.688661282 | 3.435589375 | -3.67160941 | 0.00181142743509689 | 0.0178663321829824 | -1.490757798 | Down |
| COPS2 | -0.688262564 | 9.71913 | -3.353935719 | 0.00363898154327728 | 0.0286469178846321 | -2.164038831 | Down |
| FAM179A | -0.687895641 | 5.366868125 | -3.034131743 | 0.00729644052641635 | 0.0451359277674287 | -2.829070051 | Down |
| WDR7 | 0.687824102564102 | 8.13707375 | 4.26685294450436 | 0.00048954710896047 | 0.0076151279492287 | -0.216268962 | Up |
| C16orf62 | 0.687589487179489 | 8.060923125 | 4.20351974374213 | 0.000562390196324213 | 0.00832759104557079 | -0.35192601 | Up |
| CCDC186 | 0.687405897435899 | 7.921160625 | 2.97019636260118 | 0.00837434460754655 | 0.0495659403585516 | -2.959835524 | Up |
| RPS4Y2 | -0.687119744 | 3.313241875 | -4.363303773 | 0.000396483922635136 | 0.00665767347612184 | -0.009885133 | Down |
| UXT | 0.686992820512819 | 8.782395 | 3.96589667618942 | 0.000947740359728809 | 0.0116503083144511 | -0.861287126 | Up |
| HOXB6 | -0.686987179 | 4.41152625 | -3.781339498 | 0.001422697854206 | 0.0151895643096561 | -1.25644223 | Down |
| FAR1 | -0.686744359 | 7.680736875 | -3.048638952 | 0.00707134916829261 | 0.0442072104638109 | -2.799283053 | Down |
| DUPD1 | -0.686591538 | 5.066434375 | -3.690561288 | 0.00173742271712148 | 0.0173943776924185 | -1.450334887 | Down |
| PRSS3P2 | -0.686365897 | 4.354664375 | -3.137025633 | 0.0058393462975715 | 0.0390524086535148 | -2.616941635 | Down |
| TXNRD3NB | -0.686342564 | 5.46121 | -3.481643424 | 0.00275042327649004 | 0.0236197919326284 | -1.894509872 | Down |
| LSM11 | -0.686230513 | 4.962064375 | -5.419185763 | 4.14391807385983e-05 | 0.00156535329898624 | 2.20929247193264 | Down |
| ACTL6A | -0.686119744 | 6.176164375 | -3.232333247 | 0.00474602547844993 | 0.0342463206892361 | -2.418806534 | Down |
| LAIR2 | 0.686113076923077 | 5.538236875 | 2.98981975553344 | 0.00802802649435084 | 0.0482737908936623 | -2.919790927 | Up |
| RAD18 | 0.686102564102565 | 7.011125 | 4.08730534629865 | 0.000725741569650312 | 0.00982279835298479 | -0.601019289 | Up |
| UXS1 | -0.68595 | 8.392015625 | -3.221689538 | 0.00485738630668179 | 0.0347699946713245 | -2.441005557 | Down |
| LOC101929908 | -0.685810769 | 5.67658875 | -4.061371242 | 0.000768290231437085 | 0.0102147977319476 | -0.656619532 | Down |
| RNF11 | -0.685681282 | 7.774440625 | -2.997743455 | 0.00789216719299312 | 0.0476659084651699 | -2.903598282 | Down |
| RN7SL385P | -0.685335641 | 3.950228125 | -3.661344458 | 0.00185281419177865 | 0.018121502462352 | -1.512642991 | Down |
| PRRX2 | -0.685135897 | 6.48088375 | -5.033303699 | 9.34114168877712e-05 | 0.00262622423812218 | 1.40948893693295 | Down |
| GTF2H5 | 0.684912307692308 | 6.52161125 | 2.99231914705133 | 0.00798492847324839 | 0.0480642375841943 | -2.914684664 | Up |
| RTTN | 0.683861025641026 | 5.88225375 | 3.10287157617024 | 0.00628831426356383 | 0.0409848267731773 | -2.687571418 | Up |
| POLR3H | 0.683516923076923 | 6.7217675 | 3.84571847735525 | 0.00123468290633845 | 0.0138816953680802 | -1.118714345 | Up |
| HNRNPUL1 | 0.683466153846158 | 9.44708625 | 4.75840936482098 | 0.000168258224851072 | 0.0038472968866414 | 0.830973497760948 | Up |
| PRM3 | -0.683445128 | 5.8425675 | -3.961914118 | 0.000956080023074448 | 0.0117005507438196 | -0.869822603 | Down |
| PSRC1 | -0.683088205 | 5.2976275 | -3.811761678 | 0.00133052557885887 | 0.0145384714798236 | -1.191378559 | Down |
| KLHL13 | -0.682689231 | 3.756685 | -3.137922211 | 0.0058279930710522 | 0.0389988614720108 | -2.615084762 | Down |
| KLHL9 | 0.682447179487178 | 8.432315 | 4.21370478284527 | 0.000549976281878555 | 0.00818537496918485 | -0.330104326 | Up |
| FAM208A | -0.682439231 | 7.635538125 | -3.523596644 | 0.0025083345212018 | 0.022178206633403 | -1.805599082 | Down |
| AMBRA1 | 0.682324102564102 | 7.094465 | 5.15477088090335 | 7.21969037756485e-05 | 0.00226472844723962 | 1.66292657578747 | Up |
| TIMM17B | -0.682284872 | 6.708926875 | -3.086005885 | 0.00652229044339302 | 0.0418886944380702 | -2.722371582 | Down |
| ABHD8 | -0.682244615 | 6.35490625 | -4.18450925 | 0.000586322804321142 | 0.00856491439348071 | -0.392661406 | Down |
| DNAJC12 | -0.68207 | 4.283078125 | -3.755898104 | 0.00150466319774971 | 0.0157402087746645 | -1.310823334 | Down |
| ACOT1 | -0.681688718 | 6.65953125 | -3.670055484 | 0.00181763293484153 | 0.0178854250872767 | -1.494071238 | Down |
| PRSS42 | -0.681569487 | 6.675898125 | -5.032491498 | 9.35729509389159e-05 | 0.00262759610546182 | 1.40778948408318 | Down |
| PLSCR3 | 0.681443076923077 | 7.1497125 | 3.33608954679826 | 0.00378387881725983 | 0.0292418535297795 | -2.201552377 | Up |
| SEMA6B | -0.681426923 | 6.024190625 | -3.938081049 | 0.00100755051743566 | 0.0121046288195222 | -0.920896854 | Down |
| ZNF670 | -0.681202821 | 5.061499375 | -4.477176475 | 0.000309336634169407 | 0.00564139979075617 | 0.233327648258305 | Down |
| ANGPTL7 | -0.681151795 | 3.7384175 | -3.163406943 | 0.00551416709109216 | 0.0376556379701392 | -2.562246555 | Down |
| UBE2E3 | 0.681141025641026 | 8.16571375 | 4.21022585464608 | 0.000554185111015208 | 0.00823749514185679 | -0.33755779 | Up |
| LCE3B | -0.681081026 | 6.699795 | -3.479354886 | 0.0027642758996804 | 0.0236986999115807 | -1.899355129 | Down |
| CTDSP2 | -0.680460256 | 9.380829375 | -3.648910338 | 0.00190421059327298 | 0.0184078956024112 | -1.53914394 | Down |
| BAG5 | -0.68034359 | 7.0231175 | -3.736814896 | 0.00156922637304318 | 0.016204678367974 | -1.351593956 | Down |
| SCOC-AS1 | 0.679343589743589 | 4.28103 | 3.16889700824654 | 0.00544875966688195 | 0.0373512475164758 | -2.550849488 | Up |
| GEMIN6 | -0.678504359 | 5.140431875 | -3.033847744 | 0.00730091593440624 | 0.0451359277674287 | -2.829652758 | Down |
| CUL9 | 0.678348205128206 | 6.67688125 | 2.98693498109741 | 0.00807805091020477 | 0.0484500111149638 | -2.925682893 | Up |
| RN7SL666P | -0.678338205 | 5.096936875 | -3.270281929 | 0.00436902414221527 | 0.0322549400325028 | -2.339521549 | Down |
| ACP1 | 0.678295641025638 | 8.743841875 | 4.23251254495298 | 0.000527775143223213 | 0.00798238498579067 | -0.289813677 | Up |
| RN7SL299P | -0.677842564 | 5.16395625 | -4.267043876 | 0.00048934257730953 | 0.0076151279492287 | -0.215860137 | Down |
| LRRC58 | 0.677751538461539 | 8.096243125 | 3.99417885775435 | 0.000890581040981505 | 0.0112320196548463 | -0.800666536 | Up |
| NES | -0.677519231 | 6.029675625 | -3.173323344 | 0.00539657924942087 | 0.03716846116024 | -2.541657019 | Down |
| MRPL38 | -0.677205385 | 6.570190625 | -2.968369989 | 0.00840730515355529 | 0.0496759707505062 | -2.963558329 | Down |
| SELT | 0.676533846153847 | 10.90555375 | 3.43030598565397 | 0.00307835439199639 | 0.0256514858113192 | -2.00307337 | Up |
| TRIM23 | -0.675958205 | 6.111370625 | -4.140211916 | 0.000646154852160774 | 0.00911096159756534 | -0.487601829 | Down |
| FOXD1 | -0.675497436 | 5.000475 | -4.012199361 | 0.000855980957589366 | 0.0109730295306638 | -0.762036738 | Down |
| RAI1 | 0.675438974358975 | 6.3420075 | 3.38548334456258 | 0.00339611292224793 | 0.027339500929733 | -2.097628256 | Up |
| RNU2-68P | 0.675093076923076 | 3.648423125 | 3.21481899646876 | 0.00493062831414496 | 0.0350924430644843 | -2.455325859 | Up |
| EID2 | -0.674878205 | 7.277288125 | -4.457111521 | 0.000323145706413998 | 0.00581138655817211 | 0.19051414350604 | Down |
| SBK2 | -0.674676923 | 5.723645 | -4.020333743 | 0.000840808465701229 | 0.0108269187348611 | -0.744598585 | Down |
| FDPS | -0.674609487 | 6.763973125 | -3.002042164 | 0.00781939976766833 | 0.0473983746124957 | -2.894808077 | Down |
| FZD9 | -0.674387179 | 6.38566375 | -5.214859648 | 6.3595506722136e-05 | 0.00211142517830887 | 1.78775073915003 | Down |
| PFKFB4 | -0.674381795 | 4.695198125 | -3.796665916 | 0.00137549060628891 | 0.0148694617628829 | -1.223668401 | Down |
| RNASE2 | 0.673175128205126 | 4.716098125 | 3.0493402006793 | 0.00706064190342143 | 0.0441659637259912 | -2.797842163 | Up |
| GAN | -0.673148205 | 6.79414375 | -3.536200741 | 0.00243982242706374 | 0.0217945607207414 | -1.778856073 | Down |
| RER1 | -0.672260256 | 8.632001875 | -3.653952793 | 0.00188319858937266 | 0.0183263922849723 | -1.528398117 | Down |
| RPL29P12 | -0.672226923 | 5.463725625 | -3.299633738 | 0.00409777668414091 | 0.0308213370815466 | -2.278056363 | Down |
| JMJD1C | 0.672056923076924 | 8.53032625 | 3.30720229351223 | 0.00403056617358418 | 0.0304803393276205 | -2.262187947 | Up |
| UNC93B3 | -0.671817949 | 6.92776125 | -3.013254657 | 0.00763265471682491 | 0.0465813782364593 | -2.871862249 | Down |
| CHCHD2P9 | -0.671735385 | 3.839655 | -3.342466273 | 0.00373146278277093 | 0.0290328425240561 | -2.188152792 | Down |
| FAM84B | -0.670862564 | 5.7546975 | -4.368748468 | 0.000391799069543672 | 0.00661481145458202 | 0.00175601073817688 | Down |
| RABEPK | 0.670763333333333 | 5.930851875 | 3.96331131285895 | 0.000953145871362851 | 0.0116797953858328 | -0.86682814 | Up |
| PAF1 | -0.670500769 | 7.655388125 | -3.425098949 | 0.00311370341053916 | 0.0258628244438476 | -2.014069283 | Down |
| CALM1 | 0.670192307692309 | 8.59003125 | 3.32749824662666 | 0.00385564800109969 | 0.0296344274972232 | -2.21959727 | Up |
| POU3F3 | -0.669961282 | 6.050163125 | -4.611972318 | 0.000230854290994533 | 0.00465040705290371 | 0.520395999872791 | Down |
| CRLS1 | -0.669632051 | 6.810740625 | -4.068430396 | 0.000756465869544514 | 0.0101094896912122 | -0.641485302 | Down |
| SKI | 0.669588205128205 | 8.47604375 | 3.86178791604636 | 0.00119176808126302 | 0.013569388700536 | -1.084313959 | Up |
| MTNR1A | -0.669168205 | 4.2627075 | -3.32586738 | 0.00386942254242863 | 0.0297050827392569 | -2.223021612 | Down |
| RXRG | -0.669165641 | 4.37997625 | -3.669499599 | 0.00181985796582304 | 0.0178854250872767 | -1.495256517 | Down |
| PKN3 | -0.669027436 | 5.988261875 | -3.697797876 | 0.00170996702894734 | 0.0172156378158426 | -1.434894206 | Down |
| ATP7A | 0.668697179487179 | 7.044033125 | 4.37645849897018 | 0.000385260746838982 | 0.00655900089596506 | 0.0182386895449502 | Up |
| MYF5 | -0.668528974 | 3.504166875 | -3.078109757 | 0.00663473328585348 | 0.0423891800146346 | -2.738646093 | Down |
| SEMA3G | -0.668518462 | 5.61358875 | -3.808360701 | 0.00134052583062058 | 0.0146134871535425 | -1.198654022 | Down |
| TMEM242 | -0.66823641 | 6.84503625 | -3.725611387 | 0.00160841197002628 | 0.0164924143358568 | -1.375521417 | Down |
| EHD4 | 0.6682341025641 | 7.691186875 | 3.1976747039181 | 0.00511815096919436 | 0.0360715889443644 | -2.491027682 | Up |
| SMG5 | -0.668014359 | 6.997025 | -3.491752449 | 0.00269005152742133 | 0.0232552419670826 | -1.873101121 | Down |
| PRPF8 | 0.667861794871794 | 10.34671438 | 4.71699457566309 | 0.000183968993731165 | 0.00407195188688724 | 0.743288067411938 | Up |
| CCDC42B | -0.667811282 | 5.554365 | -4.409857453 | 0.000358189661745346 | 0.00622019171512847 | 0.0896126878953396 | Down |
| CAMTA1 | 0.667759743589743 | 5.630958125 | 3.75336636559173 | 0.00151307359861183 | 0.0157927480353094 | -1.316233318 | Up |
| MAP2K2 | -0.667612051 | 8.205971875 | -3.300340895 | 0.00409145050467115 | 0.0308071907589639 | -2.276574049 | Down |
| EIF3F | -0.667542821 | 7.176878125 | -3.486781529 | 0.00271957222202877 | 0.0234498963295689 | -1.883629697 | Down |
| PLEKHA1 | -0.667291026 | 8.350259375 | -3.594497889 | 0.00214634667561117 | 0.0200099607873878 | -1.654989514 | Down |
| LOC100996760 | -0.667150513 | 5.145086875 | -3.676474616 | 0.00179213479995972 | 0.0177509321576151 | -1.480382748 | Down |
| ABI1 | 0.667142820512819 | 8.391366875 | 4.1135369365229 | 0.000685117501483173 | 0.00943256765026092 | -0.54478346 | Up |
| C6orf48 | 0.66712717948718 | 8.9331775 | 3.16456945342975 | 0.00550025332428697 | 0.0376267696592769 | -2.559833668 | Up |
| CCDC166 | -0.667079744 | 5.358734375 | -3.783179857 | 0.00141694481250174 | 0.0151462249182836 | -1.252507348 | Down |
| DCAF17 | 0.666886923076922 | 7.355475625 | 3.01257907198046 | 0.00764378273715819 | 0.0466126751059513 | -2.873245532 | Up |
| FBXO2 | -0.666811795 | 6.58450875 | -4.791914751 | 0.000156552511920372 | 0.00365992084099791 | 0.901819329255678 | Down |
| LGALS7B | -0.66672141 | 6.157492188 | -3.979273323 | 0.000920260207637082 | 0.0114636582893626 | -0.83261654 | Down |
| CEP120 | 0.666189999999999 | 7.897629375 | 3.56056108130271 | 0.00231262959669999 | 0.0210478109956257 | -1.727130265 | Up |
| HERC2P2 | -0.666083846 | 8.423136875 | -3.681569047 | 0.00177215271553068 | 0.0175909554262664 | -1.469517336 | Down |
| AUP1 | 0.665607948717946 | 8.421523125 | 4.53637186559891 | 0.000271986003975829 | 0.00521313963377028 | 0.359517346950351 | Up |
| ZNF644 | 0.665557692307692 | 8.295925625 | 4.05109483440729 | 0.000785836985934787 | 0.0103542700723392 | -0.678651239 | Up |
| KCNA7 | -0.665469744 | 4.1082625 | -4.003101847 | 0.000873276274894296 | 0.0110917984408509 | -0.781539042 | Down |
| NIPA2 | 0.665266153846154 | 8.00015875 | 3.8181804076856 | 0.00131185485062599 | 0.0144632928115137 | -1.177646254 | Up |
| MDH1 | -0.665086667 | 8.10721375 | -3.891709862 | 0.00111580116628118 | 0.0129504980064862 | -1.02023907 | Down |
| NGF | -0.664895385 | 5.6165025 | -3.421690569 | 0.00313705901227804 | 0.0259550707842258 | -2.021265299 | Down |
| TMEM200B | -0.664787692 | 6.63223 | -4.494225103 | 0.000298074688265505 | 0.00553123149634087 | 0.269689587322792 | Down |
| MCM9 | 0.664604487179485 | 6.160327813 | 3.86246622390405 | 0.00118998983915464 | 0.0135623927536319 | -1.082861709 | Up |
| RNU6-208P | 0.664222564102565 | 3.6292975 | 3.06063242423698 | 0.00689038306124791 | 0.0433785044274297 | -2.774626294 | Up |
| SDHA | -0.663937179 | 9.170604375 | -3.118478071 | 0.00607912337869796 | 0.0400901680129338 | -2.655323303 | Down |
| SUCO | 0.663789230769232 | 7.70164875 | 3.18602594467623 | 0.00524953717120173 | 0.0365772684153061 | -2.515258807 | Up |
| AQR | 0.663675384615383 | 8.65466625 | 3.17076832168991 | 0.00542663941333087 | 0.0372983440892075 | -2.546963602 | Up |
| NCOA2 | 0.663626923076924 | 7.595806875 | 3.1961749581768 | 0.00513488397106823 | 0.0361348854811857 | -2.494148592 | Up |
| CAMKK2 | 0.66337384615385 | 6.95171125 | 3.28377299574999 | 0.00424222331786302 | 0.0316293982307849 | -2.311285008 | Up |
| EPB41L4A-AS2 | -0.662994872 | 5.92161 | -4.151028414 | 0.000630999503261933 | 0.00900043171513211 | -0.464417051 | Down |
| DNAJB13 | -0.662864872 | 3.875525625 | -4.77836023 | 0.000161184658916672 | 0.00373804064216008 | 0.873169110875409 | Down |
| RN7SL766P | -0.662744103 | 3.68012375 | -3.319132645 | 0.00392682066526131 | 0.0299680449395041 | -2.237158909 | Down |
| PDZD4 | -0.662470769 | 4.9295425 | -3.12357479 | 0.00601229169135655 | 0.039820540622463 | -2.644782373 | Down |
| HIP1 | 0.662177435897436 | 6.6266275 | 3.11561685451795 | 0.00611695934489489 | 0.0402620647984934 | -2.661238787 | Up |
| SMURF2 | 0.66206923076923 | 8.42826125 | 4.04214063837079 | 0.000801454602836282 | 0.010464707242748 | -0.697848096 | Up |
| RAB11FIP3 | -0.661971538 | 6.747408125 | -3.905281198 | 0.00108296481861387 | 0.0127050049233934 | -0.991169741 | Down |
| LRRC25 | 0.661824102564106 | 6.28645875 | 3.03412677093679 | 0.00729651885566303 | 0.0451359277674287 | -2.829080252 | Up |
| PRR15 | -0.661442308 | 5.941628125 | -3.845245275 | 0.00123596982572464 | 0.0138817430901631 | -1.119727222 | Down |
| LRBA | 0.661257692307693 | 8.820951875 | 3.59243561132998 | 0.0021561031650565 | 0.0200460238895102 | -1.659375937 | Up |
| RPL36A-HNRNPH2 | -0.661078547 | 8.91816479166667 | -3.093942342 | 0.00641114857781996 | 0.0414262932917243 | -2.706002256 | Down |
| SLU7 | -0.661067949 | 7.790195625 | -3.776735982 | 0.0014371911252551 | 0.015273938550012 | -1.266284401 | Down |
| RN7SL168P | -0.661021538 | 2.77937 | -4.082875677 | 0.00073283733701759 | 0.0098729709906757 | -0.61051599 | Down |
| AAED1 | 0.660708205128204 | 7.53806875 | 3.69790824018621 | 0.0017095516749337 | 0.0172156378158426 | -1.4346587 | Up |
| NKX2-6 | -0.660542308 | 5.359589375 | -4.174406672 | 0.000599456715631782 | 0.0086833671045556 | -0.414311447 | Down |
| AP2S1 | -0.660422821 | 7.914783125 | -4.198211256 | 0.000568972144028269 | 0.00839305934232079 | -0.36330033 | Down |
| POLR2A | 0.659853076923078 | 8.947380625 | 3.03745458168633 | 0.00724427564511241 | 0.044924609414956 | -2.822251089 | Up |
| ZNF780A | -0.658816923 | 6.15440125 | -3.00174974 | 0.00782432910562462 | 0.0474059824214749 | -2.895406162 | Down |
| TRMU | -0.658528974 | 6.341201875 | -4.024154131 | 0.000833776189092549 | 0.0107601448721927 | -0.736408453 | Down |
| NEIL1 | 0.658508974358976 | 5.904821875 | 3.08773109501362 | 0.00649797178018205 | 0.0418018847034786 | -2.718814246 | Up |
| RN7SL823P | -0.658245128 | 4.2009625 | -3.041644138 | 0.00717902181836477 | 0.0446568623945304 | -2.813650375 | Down |
| SLC22A15 | -0.65816641 | 5.252253125 | -4.054108879 | 0.000780649173217589 | 0.0103261011805802 | -0.672189406 | Down |
| ADH5 | -0.657844615 | 8.09023125 | -4.042455378 | 0.000800900384689207 | 0.010464707242748 | -0.697173331 | Down |
| GATC | -0.657820256 | 9.030494375 | -3.181284617 | 0.00530395641310672 | 0.0368243408162878 | -2.525115193 | Down |
| SRD5A2 | -0.657457692 | 3.854845625 | -3.16379377 | 0.0055095334413112 | 0.0376451295447389 | -2.561443688 | Down |
| RN7SL468P | -0.656928718 | 4.29724875 | -3.674709564 | 0.00179911020016385 | 0.0178054613313031 | -1.484146889 | Down |
| TIGD5 | -0.656875128 | 6.678575625 | -4.791992859 | 0.000156526216056747 | 0.00365992084099791 | 0.901984385867759 | Down |
| MIR140 | -0.656771538 | 3.187443125 | -3.587688344 | 0.00217873008918918 | 0.0201666648882972 | -1.669472048 | Down |
| EGR4 | -0.656745385 | 5.564894375 | -3.759322775 | 0.00149336076604112 | 0.0156712108843406 | -1.303504796 | Down |
| CAPG | 0.656357692307696 | 8.203160625 | 3.50480934997575 | 0.00261401540257828 | 0.0228173724533282 | -1.845434982 | Up |
| ASB18 | -0.656181282 | 4.662609375 | -3.721019576 | 0.00162475323586013 | 0.0165967347702395 | -1.385326318 | Down |
| WTIP | -0.655817179 | 6.536831875 | -3.853769039 | 0.00121299310868912 | 0.0137105869952558 | -1.10148124 | Down |
| TPSD1 | -0.655730513 | 6.357515625 | -3.350139223 | 0.00366934055272423 | 0.0287661405903654 | -2.172022605 | Down |
| QTRTD1 | 0.654956666666668 | 6.036745625 | 3.23182308647181 | 0.00475130540418144 | 0.0342738084355484 | -2.419870942 | Up |
| DPAGT1 | 0.654822564102562 | 8.45864 | 3.03773226346134 | 0.00723993283301724 | 0.044924609414956 | -2.821681146 | Up |
| DDX59 | -0.654529487 | 5.485478125 | -4.212714188 | 0.000551171412475042 | 0.00819792732007391 | -0.332226612 | Down |
| HDAC8 | 0.654404615384615 | 7.69728375 | 3.41580622426135 | 0.00317778939512992 | 0.0261712853117643 | -2.033685745 | Up |
| VMP1 | 0.653941538461538 | 10.2516375 | 3.23506500241575 | 0.00471785097264303 | 0.0341285428045677 | -2.413106284 | Up |
| KLRF1 | 0.653231282051282 | 2.84169375 | 3.00812632503718 | 0.00771752285251361 | 0.0469272906661974 | -2.882360347 | Up |
| BCL10 | 0.653134615384613 | 7.249401875 | 4.13833785226909 | 0.000648817727572321 | 0.00912612841069891 | -0.491618945 | Up |
| ARL14EP | 0.653091538461538 | 8.047736875 | 3.69611899065828 | 0.00171629793073752 | 0.0172495713116427 | -1.438476706 | Up |
| PPP1R2 | 0.653007179487179 | 8.847625 | 2.96459573245616 | 0.00847581867247334 | 0.0499736670375249 | -2.971249331 | Up |
| MYBPC3 | -0.652623846 | 5.486283125 | -4.151562873 | 0.000630260018718669 | 0.00900043171513211 | -0.463271493 | Down |
| GLRB | -0.652274359 | 3.31844375 | -3.22374363 | 0.0048356972261196 | 0.0346999985373059 | -2.436722792 | Down |
| ELK4 | 0.651876923076924 | 7.51198 | 3.30395177283336 | 0.00405929747721419 | 0.0306252448570146 | -2.269004014 | Up |
| ASCC2 | 0.651774102564105 | 8.388403125 | 4.2929251188955 | 0.00046240224645158 | 0.00739491095100411 | -0.160451981 | Up |
| SLC25A24 | -0.65143641 | 7.00615125 | -3.15574527 | 0.005606733628283 | 0.038076334479586 | -2.578143319 | Down |
| WDR83 | -0.651266923 | 6.084175625 | -3.777198624 | 0.00143572794049163 | 0.0152696330505455 | -1.265295328 | Down |
| BPIFB3 | -0.651187179 | 4.92898375 | -4.883585129 | 0.000128589945753132 | 0.00321967506889744 | 1.09520051216277 | Down |
| TWIST1 | -0.651042051 | 6.038215 | -3.648659686 | 0.00190526113514558 | 0.0184104151230672 | -1.539678053 | Down |
| POLK | 0.650450512820513 | 7.234984375 | 3.72291106119913 | 0.00161800186985536 | 0.0165688794291384 | -1.381287561 | Up |
| SOS1 | 0.650254102564102 | 9.031928125 | 3.35982030913507 | 0.00359241404372533 | 0.0284563711347485 | -2.151660406 | Up |
| ACACA | -0.65012 | 6.4955775 | -3.550452971 | 0.00236458747059672 | 0.0213610233244953 | -1.74859951 | Down |
| KCNA4 | -0.650097949 | 4.36522875 | -3.917831407 | 0.00105346221423607 | 0.0124634740239594 | -0.964283852 | Down |
| CLEC4G | -0.650069744 | 5.581575 | -4.706575339 | 0.000188151726952518 | 0.00410988969079881 | 0.721208477076474 | Down |
| DPY19L3 | 0.650019230769232 | 6.432720625 | 3.12846052712719 | 0.0059489012336621 | 0.0395242420333417 | -2.634673479 | Up |
| TMEM102 | -0.649965128 | 6.05865 | -3.462627525 | 0.00286764841873591 | 0.02433064495649 | -1.9347543 | Down |
| PIGK | 0.649746153846155 | 6.91222875 | 2.99982497838849 | 0.00785684986856399 | 0.0475388369383751 | -2.899342365 | Up |
| TRIP12 | -0.649356154 | 9.370548125 | -3.395141423 | 0.00332501321279734 | 0.0269833157906225 | -2.077273484 | Down |
| LOC101929829 | 0.64919487179487 | 5.9511775 | 3.00575037110513 | 0.00775715271125933 | 0.0470945449964369 | -2.887222278 | Up |
| LOC646976 | -0.648932821 | 5.23945875 | -3.933718451 | 0.00101726900312483 | 0.0121837043452365 | -0.93024485 | Down |
| MIA | -0.648641795 | 5.811851875 | -4.446014986 | 0.000331049426114041 | 0.00591271207557555 | 0.166828779346387 | Down |
| ALDOAP2 | -0.648462051 | 4.94329125 | -3.102414804 | 0.0062945416356866 | 0.0410024823652732 | -2.688514594 | Down |
| CLCN7 | 0.648247692307692 | 7.78174125 | 3.47035824078636 | 0.00281940630182593 | 0.02403507778956 | -1.91839769 | Up |
| JSRP1 | -0.647799231 | 7.020003125 | -3.957988425 | 0.000964372735048295 | 0.0117310205301517 | -0.87823598 | Down |
[truncated: 335,928 more chars]
